# Supplementary material for: Cytotoxic T-cells mediate exercise-induced reductions in tumor growth
Source: eLife. 2020 Oct 23;9:e59996. doi: 10.7554/eLife.59996 (PMC7584454; doi:10.7554/eLife.59996)
Supplement: Figure 2—source data 1. [file elife-59996-fig2-data1.xlsx]

## Sheet: Human plasma
												CLIENT IDENTIFIER	#101/1° 1 hr	#101/1° post	#101/1° pre	#119/1° 1 hr	#119/1° post	#119/1° pre	#121/2° 1 hr	#121/2° post	#121/2° pre	#122/2° 1 hr	#122/2° post	#122/2° pre	#124/2° 1 hr	#124/2° post	#124/2° pre	#125/2° 1 hr	#125/2° post	#125/2° pre	#126/1° 1 hr	#126/1° post	#126/1° pre	#128/1° 1 hr	#128/1° post	#128/1° pre
												PARENT SAMPLE ID	6703034	6703035	6703036	6703037	6703038	6703039	6703040	6703041	6703042	6703043	6703044	6703045	6703046	6703047	6703048	6703049	6703050	6703051	6703052	6703053	6703054	6703055	6703056	6703057
												SAMPLE NAME	PD-UCAM-00096	PD-UCAM-00097	PD-UCAM-00098	PD-UCAM-00099	PD-UCAM-00100	PD-UCAM-00101	PD-UCAM-00102	PD-UCAM-00103	PD-UCAM-00104	PD-UCAM-00105	PD-UCAM-00106	PD-UCAM-00107	PD-UCAM-00108	PD-UCAM-00109	PD-UCAM-00110	PD-UCAM-00111	PD-UCAM-00112	PD-UCAM-00113	PD-UCAM-00114	PD-UCAM-00115	PD-UCAM-00116	PD-UCAM-00117	PD-UCAM-00118	PD-UCAM-00119
												BOX NUMBER	Box1	Box1	Box1	Box1	Box1	Box1	Box1	Box1	Box1	Box1	Box1	Box1	Box1	Box1	Box1	Box1	Box1	Box1	Box1	Box1	Box1	Box1	Box1	Box1
												CLIENT SAMPLE NUMBER	60	61	62	63	64	65	66	67	68	69	70	71	72	73	74	75	76	77	78	79	80	81	82	83
												DONOR ID	101	101	101	119	119	119	121	121	121	122	122	122	124	124	124	125	125	125	126	126	126	128	128	128
												GROUP ID	HS_1H	HS_Post	HS_Pre	HS_1H	HS_Post	HS_Pre	HS_1H	HS_Post	HS_Pre	HS_1H	HS_Post	HS_Pre	HS_1H	HS_Post	HS_Pre	HS_1H	HS_Post	HS_Pre	HS_1H	HS_Post	HS_Pre	HS_1H	HS_Post	HS_Pre
												GROUP NUMBER	12	13	11	12	13	11	12	13	11	12	13	11	12	13	11	12	13	11	12	13	11	12	13	11
												NO SAMPLES	24	24	24	24	24	24	24	24	24	24	24	24	24	24	24	24	24	24	24	24	24	24	24	24
												SAMPLE AMOUNT	100	100	100	100	100	100	100	100	100	100	100	100	100	100	100	100	100	100	100	100	100	100	100	100
												SAMPLE BOX LOCATION	B3	B4	B5	B6	B7	B8	B9	C1	C2	C3	C4	C5	C6	C7	C8	C9	D1	D2	D3	D4	D5	D6	D7	D8
												UNITS	microliters	microliters	microliters	microliters	microliters	microliters	microliters	microliters	microliters	microliters	microliters	microliters	microliters	microliters	microliters	microliters	microliters	microliters	microliters	microliters	microliters	microliters	microliters	microliters
												VOLUME EXTRACTED	70	70	70	70	70	70	70	70	70	70	70	70	70	70	70	70	70	70	70	70	70	70	70	70
PATHWAY SORTORDER	BIOCHEMICAL	SUPER PATHWAY	SUB PATHWAY	COMP ID	PLATFORM	CHEMICAL ID	RI	MASS	PUBCHEM	CAS	KEGG	Group HMDB	human serum 1h post-exercise	human serum immediately post-exercise	human serum pre-exercise	human serum 1h post-exercise	human serum immediately post-exercise	human serum pre-exercise	human serum 1h post-exercise	human serum immediately post-exercise	human serum pre-exercise	human serum 1h post-exercise	human serum immediately post-exercise	human serum pre-exercise	human serum 1h post-exercise	human serum immediately post-exercise	human serum pre-exercise	human serum 1h post-exercise	human serum immediately post-exercise	human serum pre-exercise	human serum 1h post-exercise	human serum immediately post-exercise	human serum pre-exercise	human serum 1h post-exercise	human serum immediately post-exercise	human serum pre-exercise
1560	(12 or 13)-methylmyristate (a15:0 or i15:0)	Lipid	Fatty Acid, Branched	38293	LC/MS Neg	100002344	5499	241.217	151014	2485-71-4			15867067	12455605	11817727	1894400	3501483	3429954	5041668	6687390	2642752	9127272	17074444	14777885	7786776	10884362	5741810	9555730	10548620	6592334	17792252	11869305	12861315	11985938	14276730	15342670
1565	(14 or 15)-methylpalmitate (a17:0 or i17:0)	Lipid	Fatty Acid, Branched	38768	LC/MS Neg	100002945	5695	269.249					25822604	21322130	21311562	6408009	7453794	10355038	11231829	11899471	7046449	18723672	26897344	26944216	14324366	20655672	11334895	28326094	23132876	17743960	40706224	27323096	33312064	21054688	22642184	24280916
1571	(16 or 17)-methylstearate (a19:0 or i19:0)	Lipid	Fatty Acid, Branched	38296	LC/MS Neg	100002356	5993	297.28	3083779	2724-59-6		HMDB37397	1.63259e+06	1321635	1565439	720685	797512	1142516	1016415	968590	596800	1.86356e+06	2141005	1.9245e+06	1345560	1170828	879942	2244767	1.8035e+06	1.74262e+06	2905030	1872834	2132260	1794111	1373690	1646371
1423	(2 or 3)-decenoate (10:1n7 or n8)	Lipid	Medium Chain Fatty Acid	63436	LC/MS Neg	100021502	4990	169.123					169682	187959	234023	130382	63261	143820		57728	46882	224479	317317	342455	312464	243887	136030	245563	251286	278485	445322	279746	474795	528501	325837	297456
4979	(2,4 or 2,5)-dimethylphenol sulfate	Xenobiotics	Food Component/Plant	62533	LC/MS Neg	100020519	3474	201.023					23822	27613	32299	353578	541504	386603	639111	728864	694477	63771	63311	49449	93156	132097	135819	551397	803303	756914	45789	83760	66459	49774	53207	65649
5838	(2-butoxyethoxy)acetic acid	Xenobiotics	Chemical	63380	LC/MS Pos Early	100021457	3177	177.112	106312				801020	715257	533087	104123			117476	99911						105916		316808	128940	163665						133053
501	(N(1) + N(8))-acetylspermidine	Amino Acid	Polyamine Metabolism	57814	LC/MS Pos Early	100016038	3080	188.176					846087	796523	999280	829271	991620	688797	783175	637172	496841	1104085	1050542	925755	582693	703369	589589	654813	895541	523593	981877	846635	457444	1164829	1170167	1111175
1829	(R)-3-hydroxybutyrylcarnitine	Lipid	Fatty Acid Metabolism (Acyl Carnitine, Hydroxy)	43264	LC/MS Pos Early	100003926	2400	248.149	53481617			HMDB13127	835131	667178	809091	780212	615568	305930	535511	440478	282834	999215	1083965	614262	1108671	1083876	624951	887465	985809	381908	1426766	1295489	352053	980010	652286	683697
1830	(S)-3-hydroxybutyrylcarnitine	Lipid	Fatty Acid Metabolism (Acyl Carnitine, Hydroxy)	52984	LC/MS Pos Early	100009271	2340	248.149					600164	648439	590976	748230	951220	484202	397892	426504	271638	637824	849046	479508	1213709	1296515	651491	674719	824593	282506	1405751	1209663	581086	747950	584456	550631
5803	1,2,3-benzenetriol sulfate (2)	Xenobiotics	Chemical	48762	LC/MS Neg	100006374	1709	204.981					136922	131164	223677	384229	446614	660287	261449	219424	301881	117942	123157	154234	461306	698503	770945	1738741	2245083	2230395	66214	76038	127961	154739	134234	149837
2246	1,2-dilinoleoyl-GPC (18:2/18:2)	Lipid	Phosphatidylcholine (PC)	52603	LC/MS Pos Late	100008903	2006	782.569	5288075	998-06-1		HMDB08138	177733760	198521408	220514560	248917232	326754944	303864640	203508384	221641328	188375296	196996400	231046848	193527184	241483632	336987168	263591824	293530464	340038240	333771328	227930976	241374848	274380192	289094816	299333408	241199344
2337	1,2-dilinoleoyl-GPE (18:2/18:2)*	Lipid	Phosphatidylethanolamine (PE)	53174	LC/MS Pos Late	100009217	2083	740.523	9546812			HMDB09093	1.04207e+06	1171485	1.97892e+06	1326011	1589605	1397738	1740815	2761179	2189267	1158348	1225158	972759	2170438	2073897	2532891	1.04618e+06	2272219	1914772		409606	595906	1499969	2321124	2435985
2231	1,2-dioleoyl-GPC (18:1/18:1)	Lipid	Phosphatidylcholine (PC)	52457	LC/MS Pos Late	100008905	2346	786.601	10350317	4235-95-4			110991512	112804416	152880864	202992688	250732304	216808128	161270480	104091600	153691328	106542368	121125288	88241664	118782192	114992208	117617432	169655840	180382624	161750192	154954240	134271328	196290064	184810688	172200896	215051536
2168	1,2-dipalmitoyl-GPC (16:0/16:0)	Lipid	Phosphatidylcholine (PC)	19130	LC/MS Pos Late	100000657	2365	734.569	452110	63-89-8		HMDB00564	82868640	85951792	85406120	67526544	74257360	72199520	77247128	78281136	68824736	65361512	75647976	65400496	109073728	116657232	97341904	84977976	80352928	82368488	88297320	92056584	96172040	96329504	95544168	93975528
2289	1,2-dipalmitoyl-GPE (16:0/16:0)*	Lipid	Phosphatidylethanolamine (PE)	57341	LC/MS Pos Late	100009204	2498	692.523	445468			HMDB08923	248916	264485	438843					199931		106225			113294	315863	370041		214622					197197	154159	225401
4418	1,3,7-trimethylurate	Xenobiotics	Xanthine Metabolism	34404	LC/MS Neg	100001397	1985	209.068	79437	5415-44-1	C16361	HMDB02123	33908	47515	40450	1894554	4060983	2624538	207681	216116	196011	305996	592881	299966	109116	162427	93684	159203	195041	195429	422721	487227	585622	211657	345336	355632
4415	1,3-dimethylurate	Xenobiotics	Xanthine Metabolism	32391	LC/MS Neg	100001106	1671.4	195.052	70346	944-73-0		HMDB01857	291717	382490	420433	969799	1538465	1179018	663048	693997	605938	823976	1188756	1.04115e+06		199953	309075	191043	197210	230889	835686	854021	1004059	898412	1085601	1091407
1156	1,5-anhydroglucitol (1,5-AG)	Carbohydrate	Glycolysis, Gluconeogenesis, and Pyruvate Metabolism	20675	LC/MS Neg	100000580	802	163.061	64960	154-58-5	C07326	HMDB02712	61497048	59076804	69871840	69536208	70585352	77058768	107724040	85003880	84438792	60133244	59669372	52763600	75955648	86745616	77883272	95115320	84283384	92451104	100214264	92776504	107146848	95930592	89307536	88858432
4416	1,7-dimethylurate	Xenobiotics	Xanthine Metabolism	34400	LC/MS Neg	100001399	1578.6	195.052	91611	33868-03-0	C16356	HMDB11103	545925	744713	737575	4897605	7.93265e+06	5880348	1750949	2239978	1808619	1538745	2504610	1.85832e+06	877117	1111151	1052876	782831	1.02614e+06	830059	2961138	3221875	3169791	1706819	2156010	2091862
2714	1-(1-enyl-oleoyl)-GPE (P-18:1)*	Lipid	Lysoplasmalogen	44621	LC/MS Pos Late	100005372	1566	464.314					379392	197287	461519	632726	386618	708340	414294	213851	342752	698025	333178	542003	255267	257943	430333	582245	368855	874543	601197	306150	960878	731344	465494	402532
2691	1-(1-enyl-palmitoyl)-2-arachidonoyl-GPC (P-16:0/20:4)*	Lipid	Plasmalogen	52689	LC/MS Pos Late	100009014	2154	766.574				HMDB11220	30755332	33839820	32172808	38805392	42000372	40683424	29125340	27889700	25748348	56258252	60302240	54643172	37827704	42706804	37989852	43584136	40326392	41745316	41645248	45807388	49853468	43854624	42120932	41549144
2683	1-(1-enyl-palmitoyl)-2-arachidonoyl-GPE (P-16:0/20:4)*	Lipid	Plasmalogen	52673	LC/MS Pos Late	100009002	2270	724.528				HMDB11352	40722952	40708360	45723828	42214920	54118368	50695008	25109716	26533176	22480580	64733184	71251576	63785616	33219462	38776824	30841348	42887480	43443152	44984812	32232314	34354776	39698784	51666352	52341696	49226280
2692	1-(1-enyl-palmitoyl)-2-linoleoyl-GPC (P-16:0/18:2)*	Lipid	Plasmalogen	52682	LC/MS Pos Late	100009009	2226	742.574				HMDB11211	46185464	48619360	50453040	88376360	112002448	97065120	53656108	56275948	49634088	84673568	97833592	77903096	80556912	101997192	76892800	130346560	127679568	128178888	90562016	93928168	98479528	81721760	78139960	77549064
2680	1-(1-enyl-palmitoyl)-2-linoleoyl-GPE (P-16:0/18:2)*	Lipid	Plasmalogen	52677	LC/MS Pos Late	100009069	2351	700.528				HMDB11343	4615350	4878353	5003314	8.02844e+06	8147385	9375125	6587443	6905886	6205902	10523436	10996971	10150420	4350679	4.12499e+06	3.772e+06	9286928	8198026	9278592	4967177	5694046	5804926	10088302	9056971	9965757
2685	1-(1-enyl-palmitoyl)-2-oleoyl-GPC (P-16:0/18:1)*	Lipid	Plasmalogen	52478	LC/MS Pos Late	100009007	2443	744.59					27350160	28964956	30561830	38772476	48675304	40352008	27199580	29095228	23936294	30196800	34491684	27265168	42015204	53459896	42021940	43497776	45314372	42169536	43712300	46487712	47843744	41070952	40295932	39484104
2679	1-(1-enyl-palmitoyl)-2-oleoyl-GPE (P-16:0/18:1)*	Lipid	Plasmalogen	52477	LC/MS Pos Late	100009005	2600	702.543				HMDB11342	5575903	6168241	6693009	8915880	9909367	9595275	6840931	7302492	6219514	9298461	10159141	9223860	4231890	5205480	4158647	10374315	9471170	10200960	6122253	6042652	6952577	10738008	9651484	10064663
2682	1-(1-enyl-palmitoyl)-2-palmitoleoyl-GPC (P-16:0/16:1)*	Lipid	Plasmalogen	52713	LC/MS Pos Late	100009160	2218	716.559				HMDB11207	1915278	2249943	2116568	2535496	3248522	2461902	2204872	2317502	1855413	2994082	3357813	2.79767e+06	2506095	2705028	2162536	2664689	2744130	2894783	3071981	3216986	3606794	2861725	2566663	2.8383e+06
2681	1-(1-enyl-palmitoyl)-2-palmitoyl-GPC (P-16:0/16:0)*	Lipid	Plasmalogen	52716	LC/MS Pos Late	100009162	2454	718.574	11146967			HMDB11206	15142648	15076813	16938036	16923920	22112000	18581552	16430576	17736188	15241101	19781864	22359644	18176522	20606640	27430964	20340334	23573558	23686216	23176752	23549060	25431124	25455814	21955112	22037366	20987456
2711	1-(1-enyl-palmitoyl)-GPC (P-16:0)*	Lipid	Lysoplasmalogen	52474	LC/MS Pos Late	100002875	1547	480.345	10917802			HMDB10407	3211995	2609721	3065912	4368078	4.10454e+06	4627734	3181697	2836697	2995437	3544615	2708460	3660784	2895764	3319800	3.77238e+06	4842805	3592411	6009016	5894542	4721999	7618478	4897473	4008382	3690321
2712	1-(1-enyl-palmitoyl)-GPE (P-16:0)*	Lipid	Lysoplasmalogen	39270	LC/MS Neg	100003000	6285	436.283					5828965	3679916	6814905	6102530	5439032	6686805	4071846	3262471	4.13905e+06	5.90267e+06	4203248	5722469	3352262	2529935	4606682	5655899	6.9144e+06	8.36879e+06	8469043	5433159	8824709	7358346	5.74015e+06	6604536
2696	1-(1-enyl-stearoyl)-2-arachidonoyl-GPE (P-18:0/20:4)*	Lipid	Plasmalogen	52475	LC/MS Pos Late	100008999	2511	752.559	9547058			HMDB05779	69988592	70767832	82113656	69570256	95804336	81265296	46750612	45336360	37283924	105014200	127963888	106385056	91599064	110347664	86821888	102839888	106935080	105041384	77364488	77146896	89654728	83264384	81839968	81601216
2688	1-(1-enyl-stearoyl)-2-linoleoyl-GPE (P-18:0/18:2)*	Lipid	Plasmalogen	52748	LC/MS Pos Late	100009225	2633	728.559				HMDB11376	22194646	22956664	25563090	40559652	49035004	44808232	32044950	35162712	29878318	41200264	46321212	42388644	28605074	34432456	29906028	67236960	70149696	69846608	29867874	31464914	33117632	43225252	41641816	42709088
2687	1-(1-enyl-stearoyl)-2-oleoyl-GPE (P-18:0/18:1)	Lipid	Plasmalogen	52614	LC/MS Pos Late	100008919	2950	730.574		144371-68-6		HMDB11375	6261586	6254336	6718822	8576754	11261621	9786268	7861165	8098525	7063396	9393082	10792210	8775580	6471771	7704669	6215956	14625017	15440482	15229344	7084700	7205473	8106258	8807638	9264720	9053968
2716	1-(1-enyl-stearoyl)-GPE (P-18:0)*	Lipid	Lysoplasmalogen	39271	LC/MS Pos Late	100003001	1649	466.329					1112549	719066	1281805	1480574	1213691	1.8338e+06	1197728	782622	980338	2215058	1095936	1789490	1248205	1111414	1.77092e+06	1993160	1669739	3007696	1966774	1193498	2729931	2292134	1717735	1.54309e+06
2514	1-arachidonoyl-GPC* (20:4)*	Lipid	Lysophospholipid	33228	LC/MS Pos Late	100001551	1460	544.34			C05208	HMDB10395	46064696	34900608	51798352	38598364	35731184	50255248	24973318	19680056	24467076	40803068	27398738	40464736	39199904	34721756	49119576	44365440	36981628	65302180	63055720	41925640	90679792	66811944	51275752	46471420
2565	1-arachidonoyl-GPE (20:4n6)*	Lipid	Lysophospholipid	35186	LC/MS Pos Late	100001571	1470	502.293	42607465			HMDB11517	5830649	6.1197e+06	7010250	3855083	6097123	5357744	4008835	3879071	3.82777e+06	4636074	5731624	4883268	6090557	8105839	6932844	6558335	7.27756e+06	7842887	9009950	7984869	8553443	6398477	5938525	6057321
2610	1-arachidonoyl-GPI* (20:4)*	Lipid	Lysophospholipid	34214	LC/MS Neg	100001654	5482	619.289				HMDB61690	5279128	5069917	6.37743e+06	5401177	4149257	7180774	3489093	2105977	3257645	6356707	5546022	5707723	5212844	3.98134e+06	7032934	7402350	6.88432e+06	10030795	7205083	2941487	9596399	6767058	5226041	6151132
2740	1-arachidonylglycerol (20:4)	Lipid	Monoacylglycerol	34397	LC/MS Neg	100001433	6250	303.233	5282281	35474-99-8	C13857	HMDB11549	443766	262285	392831	337606	191704	196946	205534	161807	119338	557243	368650	588186	608870	243542	511512	410560	570279	936709	873360	202847	819429	537361	742623	627639
353	1-carboxyethylisoleucine	Amino Acid	Leucine, Isoleucine and Valine Metabolism	62558	LC/MS Neg	100020427	2628	202.108					173489	230476	149536	278830	363715	67318	297521	346145	172792	348331	361935	94052	600926	687526	199543	374694	461664	202145	227565	210065	62309	203736	272195	285433
305	1-carboxyethylleucine	Amino Acid	Leucine, Isoleucine and Valine Metabolism	62559	LC/MS Neg	100020425	2663	202.108					206108	363950	136983	331312	604602	78444	324068	517587	144298	321665	499980	94847	623735	959739	165906	468069	692684	191240	327785	412833	66602	122484	233502	232682
139	1-carboxyethylphenylalanine	Amino Acid	Phenylalanine Metabolism	62566	LC/MS Neg	100020419	2844	236.093					530051	897167	421149	1.03221e+06	1774773	265325	907893	1279536	508637	1139187	1568190	313092	1677499	2239179	501270	1238532	1726257	654640	905976	1.01051e+06	173476	474731	864681	945946
157	1-carboxyethyltyrosine	Amino Acid	Tyrosine Metabolism	62564	LC/MS Neg	100020421	1846	252.088					111145	176070	83109	217439	367262	48594	236891	293079	124221	221600	299161	48522	421251	547900	110490	271192	405655	144792	168738	163563	26238	92701	187801	200270
376	1-carboxyethylvaline	Amino Acid	Leucine, Isoleucine and Valine Metabolism	62562	LC/MS Neg	100020423	2008	188.093					1073771	1400778	634255	1522134	1.96916e+06	345573	1891960	2080682	684653	1901865	2022979	474024	2981591	3372773	744711	2136197	2759072	993603	1.72639e+06	1531879	389891	978451	1320399	1472424
2739	1-dihomo-linolenylglycerol (20:3)	Lipid	Monoacylglycerol	48341	LC/MS Neg	100006121	6400	305.249					246582	208451	276182	221914	118746	136978	99242			187147	132132	261558	236040	101246	200620	214960	306736	639604	495528	84988	439570	381519	609294	437958
2744	1-docosahexaenoylglycerol (22:6)	Lipid	Monoacylglycerol	35153	LC/MS Neg	100001481	6150	309.222				HMDB11587	187321	106755	157296	64206		65659				99663	41165	98959	220050	57660	180852	116989	178190	232149	423801	59204	469683	237067	319755	234613
2528	1-lignoceroyl-GPC (24:0)	Lipid	Lysophospholipid	49617	LC/MS Pos Late	100002873	1907	608.465		325171-59-3		HMDB10405	466453	523394	624332	493581	800044	746230	429883	404241	512365	363254	415238	273414	973940	1154837	968683	708506	803815	719991	653241	703529	866216	973504	965716	1.01224e+06
2498	1-linolenoyl-GPC (18:3)*	Lipid	Lysophospholipid	45951	LC/MS Pos Late	100005350	1410	518.324				HMDB10388	4462860	4262740	5741480	3.73695e+06	4242379	4488341	3022459	2683276	3221246	2343236	2325257	2444588	5032912	5308281	5865388	4679471	4486693	6575921	4782763	4147189	7085716	6680931	6144946	6258720
2735	1-linolenoylglycerol (18:3)	Lipid	Monoacylglycerol	34393	LC/MS Neg	100001435	6214	277.217	53480978	124151-74-2		HMDB11569	577719	875406	1212771	259283		94522					206057		231695	435219	517445	375821	824079	574771		167337	288805	250313	515403	636758
2251	1-linoleoyl-2-arachidonoyl-GPC (18:2/20:4n6)*	Lipid	Phosphatidylcholine (PC)	52710	LC/MS Pos Late	100009131	1969	806.569				HMDB08147	86799008	93897632	102492528	76163784	104917968	85742232	55403640	58698368	48660584	73300520	91531344	72158080	102831120	117427720	93348968	111241184	120929120	108110344	65285616	65708520	78187224	102181528	91864024	96714128
2247	1-linoleoyl-2-linolenoyl-GPC (18:2/18:3)*	Lipid	Phosphatidylcholine (PC)	53176	LC/MS Pos Late	100009343	1939	780.554				HMDB08141	6179596	11194950	8512810	6437755	9861254	8674168	3032420	5245563	4532578	4492450	6415473	4846521	13595623	17541414	12908355	13392669	15193008	15362284	12245002	13189980	15339586	17041264	16483867	16349035
2496	1-linoleoyl-GPC (18:2)	Lipid	Lysophospholipid	34419	LC/MS Pos Late	100001395	1465	520.34	11988421		C04100	HMDB10386	235159856	191286432	279941440	257083536	297512512	376674048	206578624	188500080	239221184	228086752	191433392	246353392	213363952	226780688	287419040	259840560	232420512	379327744	289412608	230728352	426881344	376500864	349429504	308331360
2552	1-linoleoyl-GPE (18:2)*	Lipid	Lysophospholipid	36600	LC/MS Pos Late	100001570	1482	478.293	52925130			HMDB11507	11497579	10690857	12811082	7824685	13403140	13374372	12173699	13878747	13135271	8710476	10820039	9449876	11855795	15710118	14436470	12424173	14647182	16326112	10344140	10263506	12025572	12267621	13636335	12954994
2594	1-linoleoyl-GPG (18:2)*	Lipid	Lysophospholipid	54885	LC/MS Neg	100009227	5516	507.273					297788	343525	419824	229647	286756	217275	175257	307217	206991	209251	382359	212144	224998	334166	296905	270496	426141	257103	270441	259421	229240	319482	337338	373207
2604	1-linoleoyl-GPI* (18:2)*	Lipid	Lysophospholipid	36594	LC/MS Neg	100001778	5494	595.289					2350385	2454163	2642090	2482281	2409510	3680411	1901189	1444174	1883410	2881678	3108068	2742922	2078466	1.81102e+06	2684634	3146832	3283160	4522088	2557417	1274961	3405352	6399160	5371772	6198562
2734	1-linoleoylglycerol (18:2)	Lipid	Monoacylglycerol	27447	LC/MS Neg	100001040	6477	279.233	5283469	2277-28-3			5828274	6142198	11976833	3015338	3203632	3699807	1973104	2480232	2097388	4846271	6510295	4473018	5608967	5683130	6826098	5766195	9982007	10001297	6818076	2438005	7112127	6.97857e+06	7401800	7310581
86	1-methyl-4-imidazoleacetate	Amino Acid	Histidine Metabolism	32350	LC/MS Pos Early	100001208	2064	141.066	75810	2625-49-2	C05828	HMDB02820	1618604	1310800	1558394	2165474	1949163	1711549	2225032	2.00695e+06	1.92755e+06	1281875	1325231	1203328	2580920	2491580	2103741	1.92215e+06	1758952	1697985	1740794	1557096	1712286	3092092	3025315	3091642
87	1-methyl-5-imidazoleacetate	Amino Acid	Histidine Metabolism	62946	LC/MS Pos Early	100002910	1989	141.066	6451814	4200-48-0		HMDB04988	4640121	3978619	5353205	6441137	6473086	5765300	16925230	12314245	15067513	18822060	14263447	15584478	3187887	3118902	3188833	3805915	3780465	3734557	14261220	9458900	14095561	7.96437e+06	5550259	5355723
68	1-methylhistidine	Amino Acid	Histidine Metabolism	30460	LC/MS Neg	100001051	1227	168.078	92105	332-80-9	C01152	HMDB00001	164234	119746	172221	227623	145219	253695	296444	218675	216906	287916	302491	215013	151596	197759	149892	277783	269743	266109	225905	94428	234755	238850	207908	199581
4156	1-methylnicotinamide	Cofactors and Vitamins	Nicotinate and Nicotinamide Metabolism	27665	LC/MS Pos Early	55	1940	137.071	457	1005-24-9	C02918	HMDB00699	1.96762e+06	1313920	1501058	1457400	1319059	1055493	2832915	2.01682e+06	1795688	1.01241e+06	1229217	817330	923649	688607	344237	1409598	2125638	1143900	6354586	2633059	1882038	2789979	1674678	1665067
4413	1-methylurate	Xenobiotics	Xanthine Metabolism	34395	LC/MS Pos Early	100001400	1461	183.051	69726	708-79-2	C16359	HMDB03099	105579	124345	201754	866878	1136562	755312	503271	450574	368077	560765	754318	599791	133036	146623	165091	42745	72214	77647	458632	441852	478993	560238	676371	736905
4419	1-methylxanthine	Xenobiotics	Xanthine Metabolism	34389	LC/MS Neg	100001405	1568.8	165.042	80220	6136-37-4	C16358	HMDB10738	1471740	1553645	1989618	5782527	6533220	6222865	3774045	3569429	3670527	4537444	5545592	5447887	1187949	1054357	1398058	529948	617543	685092	5444561	4441033	5378573	6612201	6819048	6466335
2156	1-myristoyl-2-arachidonoyl-GPC (14:0/20:4)*	Lipid	Phosphatidylcholine (PC)	53195	LC/MS Pos Late	100009139	1914	754.538				HMDB07883	8454914	9163498	9626101	9014047	11835681	10844250	8085966	8705514	6941100	11013956	12907289	9574131	22940804	26249948	19413208	18231276	18595900	16846332	13647123	14563192	15585237	15094506	13647202	13539909
2152	1-myristoyl-2-palmitoyl-GPC (14:0/16:0)	Lipid	Phosphatidylcholine (PC)	19258	LC/MS Pos Late	100000672	2147	706.538	129657	69525-80-0		HMDB07869	19302888	19995314	19611576	17716294	22892896	21317524	35227824	35170660	31856010	16016090	17272050	14249500	41249620	46624180	36029480	21505266	21767236	21232820	16042731	17792990	17497500	20995904	21654508	21193396
2245	1-oleoyl-2-docosahexaenoyl-GPC (18:1/22:6)*	Lipid	Phosphatidylcholine (PC)	52697	LC/MS Pos Late	100009130	2011	832.585				HMDB08123	39791968	40689280	45148292	34318964	43991764	38823044	16058050	16742312	14373685	22954152	25577404	21798404	38292320	45138900	35930992	35603780	36672428	34878372	49229784	49396508	49982092	54819072	56079336	53586452
2336	1-oleoyl-2-docosahexaenoyl-GPE (18:1/22:6)*	Lipid	Phosphatidylethanolamine (PE)	53209	LC/MS Pos Late	100009220	2119	790.538					2338584	2248585	2782540	1.01817e+06	1692332	2048513	1073588	935747	1068079	927287	965085	951838	1245894	2054906	1518754	1349386	1.82529e+06	2545295	2512186	3010477	3519800	1798112	2198831	2122714
2329	1-oleoyl-2-linoleoyl-GPE (18:1/18:2)*	Lipid	Phosphatidylethanolamine (PE)	52687	LC/MS Pos Late	100009078	2270	742.538	9546753			HMDB05349	16436224	14778841	19855286	12077806	19940282	19998384	18747072	27352684	20461292	14628124	15671261	15023599	12659766	16910624	18381110	12088633	24425342	21841056	7120651	6509193	8907634	11191203	16966744	16165501
2493	1-oleoyl-GPC (18:1)	Lipid	Lysophospholipid	48258	LC/MS Pos Late	100001272	1540	522.355	16081932	19420-56-5		HMDB02815	150073968	131721040	183397888	190839600	202827360	238428288	150685280	126838096	157284640	101496856	83748624	99680224	134507456	135184160	166081952	168197360	147612224	216247984	224925264	180599136	301589664	207841952	193236768	186569984
2550	1-oleoyl-GPE (18:1)	Lipid	Lysophospholipid	35628	LC/MS Pos Late	100001569	1554	480.308	9547071	89576-29-4		HMDB11506	7156007	8.11661e+06	9896552	8313059	14774094	15737357	5202287	6224689	6526168	6127886	7.52329e+06	6497699	6112780	8338307	7.97292e+06	5820033	6964087	8094864	4745266	4850819	6918917	7912982	9360394	8661130
2592	1-oleoyl-GPG (18:1)*	Lipid	Lysophospholipid	45968	LC/MS Neg	100005716	5610	509.288					903732	971494	1291527	828398	1128371	934517	629088	749728	613101	715330	835044	608554	786135	923027	781069	564423	955088	609918	677499	713968	436692	721065	573926	784392
2602	1-oleoyl-GPI (18:1)	Lipid	Lysophospholipid	36602	LC/MS Neg	100001777	5599	597.304					4993893	5.37518e+06	5773146	6053439	5355126	8.20723e+06	4434576	3200988	4946351	5706277	5234854	5086787	3914242	2727481	5013136	5272722	5818201	9077730	4575235	1840624	6120914	7324836	6684573	7176615
2733	1-oleoylglycerol (18:1)	Lipid	Monoacylglycerol	21184	LC/MS Neg	100000924	6650	281.249	5283468	111-03-5		HMDB11567	12135308	16789468	19277494	5219789	6954697	6208742	3785878	3.95997e+06	3327164	5668659	10386248	7.42972e+06	5669987	7300012	8903488	8.26558e+06	13328067	11011236	6460465	3.78933e+06	7099242	6223978	9013367	9386437
2199	1-palmitoleoyl-2-linolenoyl-GPC (16:1/18:3)*	Lipid	Phosphatidylcholine (PC)	53180	LC/MS Pos Late	100009345	1850	754.538				HMDB08008	1577938	1797315	2110453	1551134	2.24976e+06	1628451	1373847	1332875	986328	1077514	1329722	1148716	2519397	3182274	2454666	2720726	3172025	3118043	2214158	2660946	3036207	2494018	2531378	2296896
2198	1-palmitoleoyl-2-linoleoyl-GPC (16:1/18:2)*	Lipid	Phosphatidylcholine (PC)	52683	LC/MS Pos Late	100009075	2003	756.554				HMDB08006	29077122	38428224	42147904	43398376	59834864	49980580	31008332	31279834	25167480	41926504	45552020	35467048	41777552	50812344	41373552	49266448	58890992	52299012	52217556	54607348	58916348	47224888	51495076	47418364
2484	1-palmitoleoyl-GPC* (16:1)*	Lipid	Lysophospholipid	33230	LC/MS Pos Late	100001511	1450	494.324	24779461			HMDB10383	9218194	8610905	11304349	10323385	12152402	12996020	8.17226e+06	8.13252e+06	7847858	5729036	5.64034e+06	5595276	8.18474e+06	9162530	9251019	9259642	9160736	11888966	13238787	11400767	16807966	11559790	10223148	9801967
2730	1-palmitoleoylglycerol (16:1)*	Lipid	Monoacylglycerol	52431	LC/MS Neg	100008952	6094	253.217					776519	1082849	1173229	179443	245317	421456	277941	306113	183390	295217	518164	427696	383527	293528	441373	663850	626051	708807	408013	255698		301721	408741	533949
2177	1-palmitoyl-2-alpha-linolenoyl-GPC (16:0/18:3n3)*	Lipid	Phosphatidylcholine (PC)	52684	LC/MS Pos Late	100009076	2034	756.554				HMDB07975	112274896	114005520	126475808	86440536	113118944	108194216	87052944	93429200	80962536	77484696	93741256	79652944	181066560	214584032	163580752	168011664	173420672	175821728	112153648	115590304	125442120	127417096	124200728	123381520
2186	1-palmitoyl-2-arachidonoyl-GPC (16:0/20:4n6)	Lipid	Phosphatidylcholine (PC)	52462	LC/MS Pos Late	100008914	2091	782.569	10747814	35418-58-7		HMDB07982	1104689152	1183991552	1278465408	830099904	996681216	968741184	687424704	666729600	548295104	1023520064	1194416128	999630272	1162871552	1364371200	1138418432	1185264384	1174732288	1126704640	1062431424	1116385152	1181547136	1141053696	1193619200	1094172288
2301	1-palmitoyl-2-arachidonoyl-GPE (16:0/20:4)*	Lipid	Phosphatidylethanolamine (PE)	52464	LC/MS Pos Late	100008990	2198	740.523	9546800			HMDB05323	13877719	14242605	16398803	6435648	9693096	9008072	12846784	15045860	14401196	10730607	11561937	10125120	11159362	13826774	13490312	9841077	13290267	14866211	13525816	14140312	15728353	10373584	10931972	10867756
2423	1-palmitoyl-2-arachidonoyl-GPI (16:0/20:4)*	Lipid	Phosphatidylinositol (PI)	52467	LC/MS Pos Late	100008993	2567	876.56				HMDB09789	2958447	3600994	3837298	4094674	5725828	4635074	2464430	2658998	1758364	3040135	3708222	2821174	5809698	6791234	5446790	4566573	5987110	5040473	2144841	2245183	2943049	4.0072e+06	4728327	3.96374e+06
2182	1-palmitoyl-2-dihomo-linolenoyl-GPC (16:0/20:3n3 or 6)*	Lipid	Phosphatidylcholine (PC)	52454	LC/MS Pos Late	100008985	2199	784.585					862914688	918789376	950531840	858420032	1009439872	950814528	736928128	771209984	689598848	731612800	830138688	703266816	797561216	898421056	779672448	1030830528	1015567616	1029199488	889436864	909800448	957586816	1136720256	1089953152	1118969600
2192	1-palmitoyl-2-docosahexaenoyl-GPC (16:0/22:6)	Lipid	Phosphatidylcholine (PC)	52610	LC/MS Pos Late	100008915	2023	806.569	6441886	59403-54-2		HMDB07991	676150976	687525376	715822208	429881120	534627040	484215392	203498880	215234224	174410672	399190304	445138976	383861824	673746880	787833664	631615616	570474048	585702080	562837248	691331840	667174016	689748992	700141440	684181120	675618624
2303	1-palmitoyl-2-docosahexaenoyl-GPE (16:0/22:6)*	Lipid	Phosphatidylethanolamine (PE)	52465	LC/MS Pos Late	100008991	2119	764.523	9546799			HMDB05324	19598570	19719728	20077752	6483655	8999120	9986581	10437872	8827834	9011834	7672945	9067302	8379140	7424887	10219320	9030239	12307453	13862176	19026828	18513608	20859626	25841924	11682411	12801705	12812806
2175	1-palmitoyl-2-linoleoyl-GPC (16:0/18:2)	Lipid	Phosphatidylcholine (PC)	42446	LC/MS Pos Late	1537	2160	758.569	5287971	40811-94-7		HMDB07973	1869851904	1955894912	2041386880	1751779072	1996954880	1941633792	1745668480	1806456192	1677473024	1924402176	2125874816	1884717824	2068521088	2247531008	2048525952	2119097856	2099941376	2138530432	1835035136	1890461440	1992420352	1924760448	1951577600	1917063680
2295	1-palmitoyl-2-linoleoyl-GPE (16:0/18:2)	Lipid	Phosphatidylethanolamine (PE)	42449	LC/MS Pos Late	100001870	2275	716.523	9546747			HMDB05322	14418170	12793585	14774221	7.13248e+06	11873415	12097499	20763326	25971696	20215028	11202241	12086178	11876703	13987454	15889441	16987938	11900320	18586720	18873364	8467022	8579366	11196328	9249232	10870301	10523415
2420	1-palmitoyl-2-linoleoyl-GPI (16:0/18:2)	Lipid	Phosphatidylinositol (PI)	52450	LC/MS Pos Late	1528	2730	852.56				HMDB09784	1662782	1924322	2162314	2239746	3734814	2970811	1628044	2118474	1384864	1520948	1.97967e+06	1372067	3566149	4612428	2373864	2866433	3704942	3279412	1733321	1778780	1967381	5040496	5230812	5.20009e+06
2172	1-palmitoyl-2-oleoyl-GPC (16:0/18:1)	Lipid	Phosphatidylcholine (PC)	52461	LC/MS Pos Late	1539	2358	760.585	6436017	26853-31-6;26853-31-6		HMDB07972	1608217472	1666712704	1748810496	1393510144	1595878528	1517081088	1432761856	1466757376	1317971328	1177824256	1344044160	1150581760	1728249728	1880331904	1601051136	1720259072	1622878976	1646414464	1551842048	1608781696	1672534656	1522152064	1498862976	1515236992
2293	1-palmitoyl-2-oleoyl-GPE (16:0/18:1)	Lipid	Phosphatidylethanolamine (PE)	19263	LC/MS Pos Late	1526	2509	718.538	5283496	26662-94-2		HMDB05320	13787639	13642207	16317306	5627734	10276807	10080874	12262177	13948230	10588599	9021167	10783429	9128092	8211295	11707408	9981979	7724603	12572474	11932825	5.46502e+06	5525450	6382018	6416648	7198363	7225698
2418	1-palmitoyl-2-oleoyl-GPI (16:0/18:1)*	Lipid	Phosphatidylinositol (PI)	52669	LC/MS Pos Late	100009066	3140	854.575				HMDB09783	4918732	6406309	6.34753e+06	5127485	6073437	7122538	5080581	4420988	3.53659e+06	3679129	3898266	2359382	5739006	7108548	5049093	8284893	5311214	7191869	3895959	3226469	3815694	5952701	6544711	6.25292e+06
2169	1-palmitoyl-2-palmitoleoyl-GPC (16:0/16:1)*	Lipid	Phosphatidylcholine (PC)	52470	LC/MS Pos Late	100008984	2160	732.554					81477600	87144520	95562184	70607184	92631536	84767984	99891224	93347136	86365256	61747696	69393912	57484408	114441928	131071352	105690992	89420096	85771984	91617616	73539456	80189328	79632640	77499776	74036056	71561368
2170	1-palmitoyl-2-stearoyl-GPC (16:0/18:0)	Lipid	Phosphatidylcholine (PC)	52616	LC/MS Pos Late	100008921	2653	762.601		59403-51-9		HMDB07970	29426392	30936720	34279116	24243912	28228756	27113964	27429940	28973696	25367102	22773086	24826818	22801948	37764196	47067152	37765776	51403152	50337748	53443880	37047844	40052380	44707460	38593752	34871760	36733264
2482	1-palmitoyl-GPC (16:0)	Lipid	Lysophospholipid	33955	LC/MS Pos Late	100001263	1525	496.34	86554	17364-16-8		HMDB10382	469299424	435195776	543398528	454163872	492817856	522343424	396595232	373446592	387543744	331029504	303254912	311656672	480472736	511379328	553901824	548775936	524051552	624750080	633673600	580815488	758355200	593586048	549740928	536580544
2541	1-palmitoyl-GPE (16:0)	Lipid	Lysophospholipid	35631	LC/MS Pos Late	100001567	1544	454.293	9547069	53862-35-4		HMDB11503	4304706	4475173	5277322	3639457	4005941	4434038	5141617	4695054	4469802	2206081	2024208	2159821	4.92626e+06	5397039	5369584	3565709	2793991	4563669	5.81474e+06	5360333	6881936	4857905	5400289	5280552
2587	1-palmitoyl-GPG (16:0)*	Lipid	Lysophospholipid	45970	LC/MS Neg	100005717	5570	483.273	3300276				362341	417257	512005	212455	263589	276555	307044	366312	288409	234868	331976	227081	268653	286963	330005	287827	391087	304433	250814	268736	204458	335591	364053	406634
2596	1-palmitoyl-GPI* (16:0)	Lipid	Lysophospholipid	35305	LC/MS Neg	100001655	5564	571.289				HMDB61695	2079560	1040313	2164353	2597138	1018202	3204418	2301343	1073536	2354586	1996748	1110939	1887489	2141008	615328	3.33853e+06	2402174	1686317	4588478	2139987	493086	3248059	3959118	2953683	3332893
2729	1-palmitoylglycerol (16:0)	Lipid	Monoacylglycerol	21127	LC/MS Neg	100000827	6550	255.233	14900	542-44-9		HMDB31074	8491829	8627637	9561607	4.13161e+06	3764693	6441281	4840308	4979071	4590850	5742565	7224353	6446309	7.61074e+06	5293595	9294113	6194351	8197308	11764171	7.64383e+06	3.55896e+06	8145527	6413762	8.13318e+06	7.40736e+06
90	1-ribosyl-imidazoleacetate*	Amino Acid	Histidine Metabolism	61868	LC/MS Pos Early	100001668	2006	259.092	5117448	29605-99-0	C05131	HMDB02331	1161730	1152089	1181892	1703502	1894027	1465775	1.85393e+06	1.90085e+06	1512313	796849	875861	666167	2289604	2354447	1792270	2121913	2222145	1773440	1568662	1543779	1411325	3557829	3879077	3834310
2220	1-stearoyl-2-arachidonoyl-GPC (18:0/20:4)	Lipid	Phosphatidylcholine (PC)	42450	LC/MS Pos Late	100001869	2300	810.601	16219824	35418-59-8		HMDB08048	793784768	808196160	842061760	577054080	775738624	667460416	449278656	472202336	370151936	698616768	835049984	692190912	888235840	1059630656	814909056	912408448	911871552	887080128	811947072	844987392	885946304	903335488	909131776	880900160
2323	1-stearoyl-2-arachidonoyl-GPE (18:0/20:4)	Lipid	Phosphatidylethanolamine (PE)	52447	LC/MS Pos Late	100008977	2424	768.554	5289133			HMDB09003	50122744	53079892	59156476	22408776	40851684	34273544	36559320	42865464	37785648	39496816	46318472	41816456	36067508	49862784	45652656	52308548	66142296	70204456	51408252	55779596	59699260	36463096	41469984	40094136
2439	1-stearoyl-2-arachidonoyl-GPI (18:0/20:4)	Lipid	Phosphatidylinositol (PI)	52449	LC/MS Pos Late	100000616	3000	904.591		383907-33-3		HMDB09815	50346116	51888424	59883652	50153928	74710040	59539416	33006192	37193832	29289580	55109260	64567012	50013616	79729056	99080088	69907528	104526768	105301672	92623744	77596960	83317496	80425584	56969800	55980408	57957752
2393	1-stearoyl-2-arachidonoyl-GPS (18:0/20:4)	Lipid	Phosphatidylserine (PS)	52235	LC/MS Pos Late	100001872	2565	812.544				HMDB12383	276900				451582	163881	997997				339349		294543	1889683		465328	339176	196098				287678	261300	298403
2226	1-stearoyl-2-docosahexaenoyl-GPC (18:0/22:6)	Lipid	Phosphatidylcholine (PC)	52611	LC/MS Pos Late	100008916	2197	834.601		59403-52-0		HMDB08057	233276896	248798928	257780736	142939232	176785712	156753216	75042832	78267696	67462856	134771264	155713376	121367856	244511952	297295328	230384640	199343344	191926960	185949232	198857920	206428240	212196896	236242448	220768704	235938384
2327	1-stearoyl-2-docosahexaenoyl-GPE (18:0/22:6)*	Lipid	Phosphatidylethanolamine (PE)	52466	LC/MS Pos Late	100008992	2317	792.554	9546798			HMDB05334	15772200	14088695	15357439	14496795	14580252	17365000	8911567	8813199	7.45358e+06	11402926	12918128		8143955	10702455	9964347	11645349	13874439	14366976	11863741	12668336	14959904	13963918	15321302	16239998
2212	1-stearoyl-2-linoleoyl-GPC (18:0/18:2)*	Lipid	Phosphatidylcholine (PC)	52452	LC/MS Pos Late	100008980	2380	786.601					1438981888	1557628928	1572602368	1537404928	1730174848	1699027840	1477046784	1619131392	1384792704	1605991168	1834283264	1598061568	1823133056	1968889728	1714642304	1948425856	1871249408	1939046400	1573530496	1696252032	1720657536	1793682944	1810455424	1773964672
2314	1-stearoyl-2-linoleoyl-GPE (18:0/18:2)*	Lipid	Phosphatidylethanolamine (PE)	52446	LC/MS Pos Late	100008976	2522	744.554	9546749			HMDB08994	58701680	55961416	70159384	45429108	52889016	54477328	66298608	90248648	65774700	57349072	70343432	63822044	60231420	71895304	76522864	61545608	107482088	97671864	32869440	38500372	45778120	42132128	50239900	50382248
2427	1-stearoyl-2-linoleoyl-GPI (18:0/18:2)	Lipid	Phosphatidylinositol (PI)	52468	LC/MS Pos Late	100008994	3185	880.591				HMDB09809	9860640	14244261	14999493	13171076	22606632	16831036	8987024	10766837	6675379	8927784	11008242	9692726	13316415	18213486	12469929	23055060	23949600	19898568	14187550	15988747	12530144	24846844	24763888	28276778
2209	1-stearoyl-2-oleoyl-GPC (18:0/18:1)	Lipid	Phosphatidylcholine (PC)	52438	LC/MS Pos Late	100008904	2644	788.616		56421-10-4		HMDB08038	463572352	508443488	558795904	496931968	631384576	575292608	528073120	584185152	475823456	346149696	406477504	338258688	574711936	678661312	556269312	697486656	695724416	688346112	466436416	509576544	506957536	486718624	486847552	492982400
2310	1-stearoyl-2-oleoyl-GPE (18:0/18:1)	Lipid	Phosphatidylethanolamine (PE)	42448	LC/MS Pos Late	100001856	2858	746.569				HMDB08993	16182261	16143637	19787552	11750656	22429526	21037984	11831206	18752818	12618683	14007275	16250509	15504398	12641504	16736047	18363868	14653816	24876672	20955208	6343653	7297870	8607003	10439553	11757810	12300259
2426	1-stearoyl-2-oleoyl-GPI (18:0/18:1)*	Lipid	Phosphatidylinositol (PI)	52726	LC/MS Pos Late	100009181	3711	882.607					4964052	6537973	7176172	4885874	8302949	4456660	3642729	5241973	3751191	2718634	4199808	2607994	4796865	6383137	4215766	9394704	10730343	8849978	4183065	6604579	5764795	6005940	5504169	4071942
2390	1-stearoyl-2-oleoyl-GPS (18:0/18:1)	Lipid	Phosphatidylserine (PS)	19265	LC/MS Pos Late	100000639	3000	790.559	9547087			HMDB10163	571233	283492		130607	1093281		479477	432055	281331	1016275	767996	359994	442858	1582623	179088	662672	908709	249962	217475	463452	219471	488113	537116	675472
2491	1-stearoyl-GPC (18:0)	Lipid	Lysophospholipid	33961	LC/MS Pos Late	100001271	1606	524.371	497299	19420-57-6		HMDB10384	148207600	125781944	172923216	169056672	184091104	199802816	145216032	135444864	139125168	132219488	106685920	122462168	174206208	192994048	215290672	233863936	228338928	284318528	271831040	225652368	328061088	258791168	221973984	200952192
2548	1-stearoyl-GPE (18:0)	Lipid	Lysophospholipid	42398	LC/MS Pos Late	100001461	1626	482.324	9547068	69747-55-3		HMDB11130	5494408	4789144	6167952	4426872	5979035	6082871	6258529	6362944	5997648	3729792	3479134	3.69057e+06	5780958	7388790	6835116	6.9266e+06	7.33169e+06	9081055	8092152	7.92446e+06	10337011	6396303	6572301	6269506
2590	1-stearoyl-GPG (18:0)	Lipid	Lysophospholipid	34437	LC/MS Neg	100001462	5816	511.304					222778	214428	250905	172040	216624	286286	264007	235098	197496	257157	275549	185395	216828	323991	210682	361332	453095	426228	197516	179943	218790	284974	277170	318001
2600	1-stearoyl-GPI (18:0)	Lipid	Lysophospholipid	19324	LC/MS Neg	100000656	5794	599.32		796963-93-4		HMDB61696	11451673	5647297	13477290	13374795	5796959	15352377	9420852	4727520	10046835	12688112	6.61806e+06	10515783	11315238	3992965	15777170	15771006	11656696	26433744	18452932	5517733	19945458	16532046	14087281	15108064
2581	1-stearoyl-GPS (18:0)*	Lipid	Lysophospholipid	45966	LC/MS Neg	100004327	5800	524.299	9547101				114602	29868	70625	63450	97434	39995	168529	27855	68729	232145	56446	74749	65098	97920	87487	112917	59062	80797	119070	19880	44968	80408	94240	97512
1456	10-heptadecenoate (17:1n7)	Lipid	Long Chain Monounsaturated Fatty Acid	33971	LC/MS Neg	100001278	5555	267.233	5312435	29743-97-3		HMDB60038	14416250	11579911	9845949	2901814	4275812	4474321	4377076	5519457	2239571	7675586	13943225	11331733	7978194	18945832	4971562	19609920	19100054	8633873	39881672	28679164	34326636	13590355	19061024	21218408
1465	10-nonadecenoate (19:1n9)	Lipid	Long Chain Monounsaturated Fatty Acid	33972	LC/MS Neg	100001277	5780	295.264	5312513	73033-09-7		HMDB13622	7.47989e+06	6433519	5772389	1.89831e+06	2710817	3312708	2990825	3209794	1144193	5635395	8429186	7.53154e+06	5300454	7836126	3272688	9869787	8192678	5325886	17340154	11033289	12767579	7.18642e+06	7876777	8600965
1425	10-undecenoate (11:1n1)	Lipid	Medium Chain Fatty Acid	32497	LC/MS Neg	100001197	5085.8	183.139	14891	1333-28-4	C13910	HMDB33724	5340055	5629659	6313539	1351047	1993663	2227784	1396763	1845387	1471983	2824362	4.16538e+06	3295056	2458967	3058356	2326037	3607711	4640855	4.19071e+06	4881006	4778718	5236489	5571345	5211486	4712834
3197	11-ketoetiocholanolone glucuronide	Lipid	Androgenic Steroids	47135	LC/MS Neg	100005402	4280	479.229		17181-16-7						60179	80528	71945	32553	27078		39251	66584	52720							43907	33448	41949	20892	20803	19863
3260	11beta-hydroxyandrosterone glucuronide	Lipid	Androgenic Steroids	63251	LC/MS Neg	100020541	4209	481.244					216420	157427	234438	381655	411642	332996	448426	353288	296978	245786	184024	182417	258802	204648	154994	254502	208911	177186	508360	388843	372788	191739	235422	220282
1936	12,13-DiHOME	Lipid	Fatty Acid, Dihydroxy	38395	LC/MS Neg	62	5137	313.238	10236635	263399-35-5	C14829	HMDB04705	324580	267544	376262	455758	271052	633306	388409	428054	444117	431883	364881	365947	446229	543605	302801	366314	735455	823459	332687	304957	441871	550477	960360	830517
2036	12-HETE	Lipid	Eicosanoid	37536	LC/MS Neg	100002167	5326	319.228	5312983	71030-37-0;73837-14-6		HMDB06111	265297	275482	200697	82973	183628	116220	221869	91348	167155	170325	306407	152075	187673	170824	256830	240544	205548	59973	408872	309166		296711	240836	231085
1920	13-HODE + 9-HODE	Lipid	Fatty Acid, Monohydroxy	37752	LC/MS Neg	100002196	5275	295.228					1.81697e+06	1320685	943476	564312	676772	688443	1001038	1400263	829721	1125600	1588939	1347556	827210	1693983	686630	1242258	2581482	1346693	1515698	1653207	1747789	1830963	2790452	2566310
1968	14-HDoHE/17-HDoHE	Lipid	Docosanoid	53034	LC/MS Neg	100009278	5296	343.228					136113	22130	71993	38428				26624		85719				110202		71661.8	46290.1		50340	81027	56431.7	93251	61376	67468.7
1916	16-hydroxypalmitate	Lipid	Fatty Acid, Monohydroxy	39609	LC/MS Neg	100002953	5236.2	271.228	10466	506-13-8	C18218	HMDB06294	616808	807929	626303	390507	569011	462293	490149	547035	386865	565944	882420	699492	701359	968421	493165	705640	803600	436210	1515961	1074572	1334274	921281	1142844	1174288
3200	16a-hydroxy DHEA 3-sulfate	Lipid	Androgenic Steroids	38168	LC/MS Neg	100002126	4240	383.153					1368109	1427799	1539919	3126178	3.74887e+06	3289548	1557328	1529417	1227787	2172273	2274289	1952164	1555742	1691599	1448009	2463135	2414704	2380384	1465931	1590028	1576295	5273016	5275441	5294269
3117	17alpha-hydroxypregnanolone glucuronide	Lipid	Pregnenolone Steroids	47403	LC/MS Neg	100005418	5071.9	509.276					77677	60694	95845	488288	448914	358666		38092		108562	62872	112313	414267	454510	347682	79463	100365	64101	396555	210288	244339	103950	121566	106579
3116	17alpha-hydroxypregnenolone 3-sulfate	Lipid	Pregnenolone Steroids	37482	LC/MS Neg	100002128	4800	411.185	152971	28901-70-4		HMDB00416		28845		69490	171937	83047	83040	105354	70825	55700	121588	25415	187994	248831	127438	59513	140865	54380	326035	278438	101184	52617	110709	103662
4081	2'-deoxyuridine	Nucleotide	Pyrimidine Metabolism, Uracil containing	52602	LC/MS Neg	536	1586	227.067	13712	951-78-0	C00526	HMDB00012	106357	112018	123610	129904	165389	123620	108833	141845	92536	139413	161621	152000	170305	300079	135541	149756	186151	117325	145241	201753	142218	126276	134763	130441
4107	2'-O-methylcytidine	Nucleotide	Pyrimidine Metabolism, Cytidine containing	57554	LC/MS Pos Early	100010895	2411	258.108	150971	2140-72-9			626026	649141	633921	672451	885421	737401	949767	955730	768936	503759	672845	501481	521043	621160	524745	858631	926965	811232	859399	867644	955319	851397	960144	785292
4069	2'-O-methyluridine	Nucleotide	Pyrimidine Metabolism, Uracil containing	57655	LC/MS Neg	100010896	1831	257.078	102212	2140-76-3			31119	29664	33216	45362	55592	63336	57781	67031	58061	36770	39156	23560	27976	48974	31661	49859	67889	46577	53315	60440	63075	44924	45769	44771
384	2,3-dihydroxy-2-methylbutyrate	Amino Acid	Leucine, Isoleucine and Valine Metabolism	57547	LC/MS Neg	100010869	787	133.051	301941	14868-24-7		HMDB29576	266685	180901	117429	380200	396793	376434	376355	351770	239783	254494	230544	142536	260905	275869	155443	487045	415382	358900	416938	280176	234969	833387	622753	712570
403	2,3-dihydroxy-5-methylthio-4-pentenoate (DMTPA)*	Amino Acid	Methionine, Cysteine, SAM and Taurine Metabolism	62805	LC/MS Neg	100020893	1156	177.023					3068409	2993753	3481710	3630532	4.01097e+06	3.80596e+06	3.90655e+06	3460700	2875937	3.88585e+06	3.76519e+06	3043369	4383033	4798102	3977484	4561273	4536606	3729903	3.96155e+06	3568978	4140479	3743734	3423722	3395901
4563	2,3-dihydroxyisovalerate	Xenobiotics	Food Component/Plant	38276	LC/MS Polar	100002417	1050	133.051	677	1756-18-9	C04039	HMDB12141	1.00204e+06	976387	1376380	608798	653253	630255	1888145	1932331	1663446	414252	373398	401391	2018099	2222591	1564413	3291246	3.63976e+06	3984735	373960	278489	430084	5030340	5086802	5886860
5763	2,4-di-tert-butylphenol	Xenobiotics	Chemical	64328	LC/MS Neg	100021918	5749	205.16		96-76-4			18297784	26188436	22469190	17456188	34092072	22154978	13756072	21084482	12190686	17163490	29675270	16011700	20855012	38568404	18010352	21492264	37732928	19810170	22005840	37703592	21824042	19989738	21870236	22164116
5593	2,6-dihydroxybenzoic acid	Xenobiotics	Drug - Topical Agents	63042	LC/MS Neg	100020837	2575	153.019	9338	303-07-1		HMDB13676	2488767	2642245	2670526	9071788	10771351	9105809	7110486	7561175	6008114	7.31988e+06	7837411	6289159	4629914	5576528	4877891	10630134	11772164	10711119	4212884	4459808	4552030	21768636	21717324	22640858
4568	2,8-quinolinediol sulfate	Xenobiotics	Food Component/Plant	48691	LC/MS Neg	100004321	2612	239.997								74508	46761		38325	53635	21401	100777	187213	100546	112744	187200	87130		42516
5025	2-acetamidophenol sulfate	Xenobiotics	Food Component/Plant	48580	LC/MS Neg	100006190	2251	230.013	181671	40712-60-5			165824	237204	227344	62454	106332	79498	559562	793026	584731	1186988	1756636	1802875	192781	341280	359009	389167	588547	698613	398830	407444	456574	310170	385785	366289
5751	2-acrylamidoglycolic acid	Xenobiotics	Chemical	63259	LC/MS Pos Early	100021060	810	146.045	92230	6737-24-2			457512	500794	646224	469173	470834	321902	622091	474745	356376	473033	437691	270185	441845	593720	353670	580517	696656	465996	629660	562869	542462	655011	490321	697038
116	2-aminoadipate	Amino Acid	Lysine Metabolism	6146	LC/MS Polar	381	3500	160.061	469	542-32-5;1118-90-7	C00956	HMDB00510	401295	461921	454770	251095	365236	257466	462118	541372	427446	412188	472874	357632	409057	590166	401327	320338	287662	185438	256801	236626	243660	159585	207918	231519
531	2-aminobutyrate	Amino Acid	Glutathione Metabolism	42374	LC/MS Pos Early	1128	2059	104.071	439691	1492-24-6	C02261	HMDB00650	75068840	67663336	88143488	41340636	36385784	44596616	56258728	46662960	52959904	55248880	49749628	58303356	35137248	36528408	40083728	65162116	63253012	71003408	51026736	46998840	56793560	45844208	44710432	44464148
1673	2-aminoheptanoate	Lipid	Fatty Acid, Amino	43761	LC/MS Pos Early	100004542	3160	146.118	227939	1115-90-8			607721	529441	644300	719814	684121	793283	598113	493760	523541	1.02297e+06	940577	955372	280090	458578	443886	886416	1063706	1057645	475251	381853	440246	1001379	981321	833974
1678	2-aminooctanoate	Lipid	Fatty Acid, Amino	43343	LC/MS Neg	100004227	3385	158.119	69522	644-90-6		HMDB00991	263613	224437	301352	149459	144221	162532	341175	281300	305098	195227	174628	194170	264446	281378	348556	390073	397983	411359	201454	175902	242220	268328	256627	260103
5026	2-aminophenol sulfate	Xenobiotics	Food Component/Plant	43266	LC/MS Neg	100004322	1677	188.002	181670			HMDB61116	2197147	2465445	2430390	662162	855194	567894	3461999	3710121	3139491	6900544	9578991	8135236	2794125	3512623	3.52696e+06	4258815	5440487	5099853	2420915	2552078	2820806	4298266	5167158	4966243
2751	2-arachidonoylglycerol (20:4)	Lipid	Monoacylglycerol	19266	LC/MS Neg	100000584	6170	303.233	5282280	53847-30-6	C13856	HMDB04666	240221	72252	215307	139701	40537	156661	127303	72361.4	205729	170976	47035	147852	150637	103715	329325	160096	195461	490480	305905	64471.3	659215	511278	207871	230776
4346	2-ethylphenylsulfate	Xenobiotics	Benzoate Metabolism	36847	LC/MS Neg	100001809	3416	201.023								97572	134033	99191	213265	149944	149120		16140					154725	205310	210782		22985
355	2-hydroxy-3-methylvalerate	Amino Acid	Leucine, Isoleucine and Valine Metabolism	36746	LC/MS Neg	100001541	1800	131.071	164623	488-15-3		HMDB00317	975670	1.03144e+06	1155140	852629	862188	500200	1254916	1157691	996376	908052	773425	644561	1069439	946712	718670	966317	991609	797956	875325	750929	750592	564437	828681	748560
404	2-hydroxy-4-(methylthio)butanoic acid	Amino Acid	Methionine, Cysteine, SAM and Taurine Metabolism	63739	LC/MS Polar	100021372	1065	149.028		583-91-5			423445	397089	458465	984685	892563	604540	929886	727184	507317	672538	567725	457167	734656	821065	566815	712611	613104	416043	575789	518388	564246	399005	363349	393350
1590	2-hydroxyadipate	Lipid	Fatty Acid, Dicarboxylate	31934	LC/MS Polar	100001153	3000	161.046	193530	18294-85-4	C02360	HMDB00321	226359		272279	1601452	193738			309968	196818	465749	232322	258752	240729	314282	208288	344737	274679		276361	409359	265589		313714	325303
1879	2-hydroxyarachidate*	Lipid	Fatty Acid, Monohydroxy	61700	LC/MS Neg	100019892	5990	327.291	5225199				376025	345639	613097	345621	304634	613192	372522	308101	347917	257213	293989	346373	497671	485474	719910	419400	271811	351798	285740	239681	341691	451145	390939	464701
1880	2-hydroxybehenate	Lipid	Fatty Acid, Monohydroxy	57663	LC/MS Neg	100015637	6384	355.322	193484				376453	354488	473340	339772	342149	492854	368612	357739	309328	370973	416435	449133	439441	426087	511394	520104	330276	382961	367498	324702	362884	417975	383165	434142
533	2-hydroxybutyrate/2-hydroxyisobutyrate	Amino Acid	Glutathione Metabolism	52281	LC/MS Polar	100008928	1258	103.04					85668152	62568852	57720240	65542400	48483976	25678476	62536208	42310256	18594464	111991440	70859224	48862236	72115800	58216568	29828872	122075232	83309232	41964000	92889328	61215852	36961640	64740476	39175156	44539004
1871	2-hydroxydecanoate	Lipid	Fatty Acid, Monohydroxy	42489	LC/MS Neg	100004089	4840	187.134	21488	5393-81-7			2390480	2316966	3530586	1258117	867574	2248525	978500	906321	1184382	4766500	4647707	6015038	1537337	1778918	2150568	1650138	1355018	2655198	1465083	1480789	2265396	2797405	2305211	2313265
4440	2-hydroxyfluorene sulfate	Xenobiotics	Tobacco Metabolite	62528	LC/MS Neg	100020585	4372	261.023					17286	22161	29538	55765	44268	29829	46328	39553	39483	46621	42333	36596	28602	28245	34400	31846	35783	46502	34442	37969	38157	18112		22448
1586	2-hydroxyglutarate	Lipid	Fatty Acid, Dicarboxylate	52294	LC/MS Pos Early	100002070	958	166.071	43	40951-21-1	C02630	HMDB0059655	421220	250802	395334	504062	461883	397317	353985	313210	352897	353097	276713	293368	258590	286456	329905	459975	355072	393057	411612	236294	292662	407839	446512	369106
4298	2-hydroxyhippurate (salicylurate)	Xenobiotics	Benzoate Metabolism	18281	LC/MS Neg	1869	2184	194.046	10253	487-54-7	C07588	HMDB00840	74260	144860	99932	191718	465583	202574	645791	968373	453587	319311	593026	242162	164941	252165	146439	364941	552024	328981	110931	143825	98384	141504	288479	305918
1872	2-hydroxylaurate	Lipid	Fatty Acid, Monohydroxy	52916	LC/MS Neg	100008934	5211	215.165	97783	2984-55-6			500600	474220	494486	434468	529586	570400	476828	429985	431655	333172	393100	419856	922327	1079824	893051	599828	576542	570213	696966	722622	881792	653644	611556	606740
1882	2-hydroxynervonate*	Lipid	Fatty Acid, Monohydroxy	61698	LC/MS Neg	100015638	6345	381.337	5312783				1188607	1070288	1738629	856565	820743	1252611	888778	702620	714502	1015962	958010	1164055	1083892	930225	1032139	1354037	809675	1071599	1070378	857693	1073306	1772907	1306784	1501438
1869	2-hydroxyoctanoate	Lipid	Fatty Acid, Monohydroxy	22036	LC/MS Neg	100000743	3736.8	159.103	94180	617-73-2		HMDB02264	891927	1314035	1.32575e+06	376965	574275	401141	564209	739196	570623	498509	635959	436271	608019	775137	552832	563442	783178	684741	335544	414653	305152	481931	542109	505909
1874	2-hydroxypalmitate	Lipid	Fatty Acid, Monohydroxy	35675	LC/MS Neg	100001579	5511.2	271.228	92836	764-67-0		HMDB31057	28427068	19713068	37194268	28447488	18013226	33756044	23284574	17050492	22993856	33302348	23742380	32293756	25336104	18380172	31109706	30335200	24823804	37256632	42169748	23662162	39847800	41242400	31736002	31115286
149	2-hydroxyphenylacetate	Amino Acid	Phenylalanine Metabolism	1432	LC/MS Neg	235	2164.6	151.04	11970	614-75-5	C05852	HMDB00669	194336	231422	250069	199657	259790	238915	203336	192323	222570	231491	241786	237761	155704	171602	178962	129354	112372	152910	138829	120567	215787	295843	296459	227541
1632	2-hydroxysebacate	Lipid	Fatty Acid, Dicarboxylate	63357	LC/MS Neg	100020378	1324	217.108	128458	103963-71-9		HMDB00424	127660	149688	181385	136478	195706	221666	135609	201917	143316	320316	433790	398571	101606	133030	107330	126302	155386	145774	224600	187016	184822	184504	139845	153607
1877	2-hydroxystearate	Lipid	Fatty Acid, Monohydroxy	17945	LC/MS Neg	1239	5695	299.259	69417	629-22-1	C03045		7490201	4985637	9591916	8998923	5910671	11215914	8511050	5589893	7.58268e+06	10341188	7014172	9860727	7.95845e+06	5469331	9147475	9812999	7115686	11560561	11022497	6189151	11433111	10479415	7904693	7819534
4908	2-keto-3-deoxy-gluconate	Xenobiotics	Food Component/Plant	48141	LC/MS Polar	100005946	1900	177.041	161227	17510-99-5	C00204	HMDB01353	934857	491511	1409285	1562092	1628797	324886	2503620	2321760	1605979	3.68621e+06	2987905	2409327	1528130	2501666	1.97755e+06	2633084	1009097	1709747	2603256	2601034	2324149	1671256	680500	350578
312	2-ketocaprylate	Amino Acid	Leucine, Isoleucine and Valine Metabolism	63120	LC/MS Neg	100020833	3951	157.087	67600	328-51-8		HMDB13211	1236920	1148829	1690480	625115	858964	878408	794754	947720	746767	946912	798471	980347	857092	805327	888881	1169538	1289850	1350658	825137	920309	967110	1309219	1158703	1341709
2750	2-linoleoylglycerol (18:2)	Lipid	Monoacylglycerol	32506	LC/MS Neg	100000987	6250	279.233	5365676	3443-82-1		HMDB11538	716490	652268	2512564	1.80678e+06	808128	1299457	1.31024e+06	570300	1769532	837623	402142	1400129	982676	247811	2432516	636456	3073354	3741693	2518422	411895	3165319	3041038	1503471	1303829
4406	2-methoxyhydroquinone sulfate (1)	Xenobiotics	Benzoate Metabolism	64049	LC/MS Neg	100021839	1505	218.997					870537	1414587	606994	265266	581692	279010	137592	235052	147055	112518	264787	556069	50320	73152	92261	75613	280801	132375	64995	82544	106802	44285	69029	78016
4407	2-methoxyhydroquinone sulfate (2)	Xenobiotics	Benzoate Metabolism	64050	LC/MS Neg	100021840	1619	218.997					198046	325040	138851	45238	111909	93853	52238	59973		48855	95768	105332				48865	82993	43537			29690		27591
357	2-methylbutyrylcarnitine (C5)	Amino Acid	Leucine, Isoleucine and Valine Metabolism	45095	LC/MS Pos Early	100001509	3050	246.17	6426901	31023-25-3		HMDB00378	1525671	1.60754e+06	2099912	1430014	1.76547e+06	1448528	1926720	1.79153e+06	1582366	2150677	2452297	2190126	1564905	1.9324e+06	1588919	1544935	1787798	1532347	1094360	896665	1023972	1336196	1224751	1298280
1391	2-methylcitrate/homocitrate	Energy	TCA Cycle	52282	LC/MS Neg	100008929	575	205.035					1014120	966215	1131346	1039624	1072854	1078148	918993	977345	810924	1250025	1029556	1023727	865224	650122	753782	1456675	1433576	1171852	1136361	787221	1205976	1110784	873446	899450
1698	2-methylmalonylcarnitine (C4-DC)	Lipid	Fatty Acid Metabolism (also BCAA Metabolism)	35482	LC/MS Pos Early	100001596	2440	262.128	53481628	149181-64-6		HMDB13133	130415	146900	188660				152346	80496	70022	102972	148653		122351	129524	64715	117279		166678	116718				55107	68573
15	2-methylserine	Amino Acid	Glycine, Serine and Threonine Metabolism	53229	LC/MS Pos Early	100009246	1652	120.066	94309		C02115		4859645	1898909	5329964	544547	1160544	2479617	2862844							2735865	3534549	1615626	4093300	1275096	5184334	5093132		4338038	3409773	2913696
5762	2-naphthol sulfate	Xenobiotics	Chemical	62520	LC/MS Neg	100020515	3658	223.007	74428				68164	74471	75709	543898	682848	629700	147152	166034	137615	289928	309776	282894	127778	167511	154021	222572	247514	236035	226542	227258	256433	117376	120275	123188
4189	2-O-methylascorbic acid	Cofactors and Vitamins	Ascorbate and Aldarate Metabolism	63990	LC/MS Polar	100003258	1512	189.041	99779	17860-87-6			6903968	7282236	7871611	9898788	10526163	9324834	8185798	5828580	4728012	13724588	11136946	8778269	8572640	9360584	8658842	17625644	15696176	11706386	9815697	8809771	8968070	11318186	9084555	10166383
2749	2-oleoylglycerol (18:1)	Lipid	Monoacylglycerol	21232	LC/MS Neg	100000943	6500	281.249	5319879	3443-84-3		HMDB11537	1344784	1462849	2246859	867977	863966	967147		579478		995494	1.02588e+06	995198	917150	735129	1601887	880838	1437473		846662	352739			1529443	1134681
4572	2-oxindole-3-acetate	Xenobiotics	Food Component/Plant	40479	LC/MS Neg	100003109	2076	190.051	3080590	2971-31-5		HMDB35514				86160	135781	66765	42692	58520	31880	240057	353699	184745		33540									27702	28904
444	2-oxoarginine*	Amino Acid	Urea cycle; Arginine and Proline Metabolism	55072	LC/MS Pos Early	100002784	1760	174.087	558	3715-10-04	C03771	HMDB04225	1638053	2431778	1867622	2139841	3251092	1994642	2224285	2678325	1347653	1629780	2432699	1535976	2376125	3253394	1813553	2165897	2878144	1896607	840078	918512	756704	4806567	5860180	6057491
2485	2-palmitoleoyl-GPC* (16:1)*	Lipid	Lysophospholipid	35819	LC/MS Pos Late	100001561	1425	494.324				HMDB10383	610293	649084	569993	547210	789836	705363	494598	517252	396218	295832	353614	282719	316844	512784	530611	606294	562919	553645	759438	731850	925987	586984	576642	609705
2483	2-palmitoyl-GPC* (16:0)*	Lipid	Lysophospholipid	35253	LC/MS Neg	100001562	6215	570.341	15061532			HMDB61702	13346746	13249431	17540404	12354588	14555244	16463051	11784161	11139672	11487558	9246496	8356472	8275212	12087664	13050953	14511189	15618490	18460674	18050412	18161766	18463380	22456200	15615221	14407033	15889403
2746	2-palmitoylglycerol (16:0)	Lipid	Monoacylglycerol	33419	LC/MS Neg	100001048	6400	255.233	123409	23470-00-0		HMDB11533	2331000	1596633	3589323	1657125	778012	2406833	2335345	1127661	2634264	1633542	1093670		1278573	329455	3399830		1477197	5535580	2651410	844785	4889826	4690591
4447	2-piperidinone	Xenobiotics	Food Component/Plant	43400	LC/MS Pos Early	100004295	1675	100.076	12665	675-20-7		HMDB11749	13269853	10920092	9380913	11449274	12221685	14029709	11397602	10336480	8768665	6765981	6178656	6962888	3853114	4564742	4616865	6900083	8177942	8415583	5431654	5742229	5601612	9534388	8598830	10291449
58	2-pyrrolidinone	Amino Acid	Glutamate Metabolism	31675	LC/MS Pos Early	100001081	1262	86.06	12025	616-45-5		HMDB02039	603262	436114	499324	538255	420963	707871	495460	503799	454644	363430	370654	383474	523558	721718	667934	439832	615717	482151	554531	612652	451329	396615	363772	352140
2549	2-stearoyl-GPE (18:0)*	Lipid	Lysophospholipid	41220	LC/MS Neg	100003901	6350	480.31				HMDB11129	1422579	1502775	1.84672e+06	1208975	1683057	1.68763e+06	1879024	2.04971e+06	1648500	1033496	1134793	867249	1475194	1643329	1620782	1964195	2433023	2287480	2154229	2442534	2170535	1574510	1754136	1893014
3122	21-hydroxypregnenolone disulfate	Lipid	Pregnenolone Steroids	46115	LC/MS Neg	100001999	3935	245.067	134595	1164-98-3			404975	372423	418091	794127	876924	726456	691876	692807	536123	503115	569422	484139	792977	877570	742338	546158	515106	395823	2.02167e+06	1780961	1.80321e+06	675624	734054	763821
3119	21-hydroxypregnenolone monosulfate (1)	Lipid	Pregnenolone Steroids	37174	LC/MS Neg	100002003	4624	411.185	174681	88378-34-1			18644			59814	57227	43856	43881	38797	20870	54538	44518	31918	79419	89739	52405	51231	47647		227405	147499	92240	71372	80268	74920
3120	21-hydroxypregnenolone monosulfate (2)	Lipid	Pregnenolone Steroids	37175	LC/MS Neg	100002004	4711	411.185	10670474							30366	30917	25577	26141	20129					24806	24658	31214	15218			29855	19579		29314	25589	26375
1940	2R,3R-dihydroxybutyrate	Lipid	Fatty Acid, Dihydroxy	63109	LC/MS Polar	100002367	1543	119.035	13120901	759-06-8		HMDB00498	16171192	16108776	18300674	13697405	13256030	14514255	14825321	11616145	9878279	17926986	17240300	14037056	19771004	22526612	16920888	13754824	11196560	11253087	17242872	15425609	19928844	13866331	11492303	13108833
1939	2S,3R-dihydroxybutyrate	Lipid	Fatty Acid, Dihydroxy	62950	LC/MS Polar	100002284	1660	119.035	10964471	5057-93-2		HMDB02453	23619960	26547072	30261988	13430495	11245911	14318709	24331324	19613466	20037108	33761700	28495234	25738370	16783484	14796567	12770940	26740184	22879910	24816368	20609456	20513892	24907734	22474004	18055830	20123288
1943	3,4-dihydroxybutyrate	Lipid	Fatty Acid, Dihydroxy	62952	LC/MS Polar	100001730	2204	119.035		51267-44-8			3388901	2956095	4247786	3660284	3544584	3700559	3416802	2662472	2497638	3968304	3301405	3946859	3412263	4497342	3666321	4930792	3112897	3206193	4370752	3393297	4863777	4751438	4.13914e+06	5070915
5841	3,5-dichloro-2,6-dihydroxybenzoic acid	Xenobiotics	Chemical	63589	LC/MS Polar	100021324	693	220.941					601836	536492	615440	629846	687072	647243	757772	764944	659824	327078	317091	261143	265330	286243	243229	414110	538457	492879	379861	427912	467945	192342	168249	194784
4417	3,7-dimethylurate	Xenobiotics	Xanthine Metabolism	34399	LC/MS Neg	100001398	1418	195.052	83126	13087-49-5	C16360	HMDB01982		30790	29062	155026	232697	209489	298575	349069	236318	113796	174887	128940	785676	1082520	774119	195449	248084	264857	135068	217404	236831	293785	372301	354926
4089	3-(3-amino-3-carboxypropyl)uridine*	Nucleotide	Pyrimidine Metabolism, Uracil containing	62924	LC/MS Neg	100001426	1369	344.11	171198	52745-94-5				17635	28915	22683	33120	23344	31981	24974	24541	32289	32978	20911	25400	25453	29595	27810	30592	25718	31597	23094	29780	25845		26186
4396	3-(3-hydroxyphenyl)propionate	Xenobiotics	Benzoate Metabolism	35635	LC/MS Neg	100001624	1980	165.056	91	621-54-5	C11457	HMDB00375	158927	150488	129846	212947	319197	374119	209557	205701	137646	55535	107281	323881	1021642	1179969	1318968	42461	94864	129362	719264	840167	876729	925468	1614590	1595932
4393	3-(3-hydroxyphenyl)propionate sulfate	Xenobiotics	Benzoate Metabolism	45415	LC/MS Neg	100005391	1294	245.012	187488	86321-32-6			39493	60972	51342	80102	166395	73786	83835	102722	44897	54069	107987	104054	259392	449140	251713				136122	145128	108661	125316	230343	254712
171	3-(4-hydroxyphenyl)lactate (HPLA)	Amino Acid	Tyrosine Metabolism	32197	LC/MS Neg	240	1379	181.051	9378	6482-98-0	C03672	HMDB00755	15260229	12667910	11563743	23684842	19970332	12784555	24449352	17816248	12561892	13789004	12245735	8164657	19659732	17513496	11160928	18510388	18419516	10956379	16528602	11265923	10856441	13670273	11694228	11728145
5698	3-acetylphenol sulfate	Xenobiotics	Chemical	48693	LC/MS Neg	100004326	2477	215.002						28270	26853	157167	232807	189929	118833	134523	101538	77033	133155	112052	156480	240786	226156		33014	29613	75937	104869	120317	143224	178514	200636
442	3-amino-2-piperidone	Amino Acid	Urea cycle; Arginine and Proline Metabolism	62853	LC/MS Pos Early	100020361	2065	115.087	5200225	1892-22-4		HMDB00323	424688	380245	513125	757356	808816	851910	886892	685789	696637	585381	519911	624906	458743	491556	511643	584892	586606	591393	667927	633005	697411	543738	439423	486211
4123	3-aminoisobutyrate	Nucleotide	Pyrimidine Metabolism, Thymine containing	1566	LC/MS Pos Early	1114	2190	104.071	64956	10569-72-9;214139-20-5	C05145	HMDB03911	4338136	2697823	3785449	5806419	7300432	6282253	6991758	5770440	5554575	5769435	5004724	5412346	4501381	4988202	4205542	9098648	9606760	10684784	12674078	13137520	13067691	8606543	8654243	7258802
5842	3-bromo-5-chloro-2,6-dihydroxybenzoic acid*	Xenobiotics	Chemical	63681	LC/MS Neg	100021707	4505	264.891					365433	407741	413654	379844	438500	411409	262477	260686	211185	173486	188107	166703	160232	189768	152625	298907	339179	292304	256074	266496	256151	134204	132122	150182
1630	3-carboxy-4-methyl-5-pentyl-2-furanpropionate (3-CMPFP)	Lipid	Fatty Acid, Dicarboxylate	61871	LC/MS Neg	100020004	4000	267.124	194501				12367624	12629193	13739145	11973838	14821018	13501605	14111858	14631924	12929218	10101676	11261865	9629800	8539890	10202016	9197493	20978736	22086312	22668692	14121884	14528403	15367678	10926678	10918510	11410280
1628	3-carboxy-4-methyl-5-propyl-2-furanpropanoate (CMPF)	Lipid	Fatty Acid, Dicarboxylate	31787	LC/MS Neg	100001178	2800	239.093	123979	86879-39-2		HMDB61112	94028216	95264960	100820984	52598104	64585416	58468104	8074471	8412894	7225443	11106524	11830446	10229081	16731281	19225742	17039102	11970281	12706749	12349426	25742080	26143334	26351124	28308940	27865070	29057996
1792	3-decenoylcarnitine	Lipid	Fatty Acid Metabolism (Acyl Carnitine, Monounsaturated)	63361	LC/MS Pos Late	100021136	1045	314.233					1145333	807213	1081951	380778	437346	842988	546570	666839	626327	789684	1391159	1454079	1870680	1886464	1750208	1103026	1124389	1690432	2027452	1253124	2877319	3064124	1364891	1.55429e+06
4686	3-ethylcatechol sulfate (1)	Xenobiotics	Food Component/Plant	62796	LC/MS Neg	100020851	3422	217.018					65215	86936	107779	564443	681679	569813	160081	180066	149103	491473	559979	328301		23370		615587	712491	702424	206278	221768	245386	456904	497327	514241
4687	3-ethylcatechol sulfate (2)	Xenobiotics	Food Component/Plant	62797	LC/MS Neg	100020852	3555	217.018								199954	196961	168818	63450	72921	67607	58014	74452	75458				87895	108199	111187	22455	23633	37437	30950	41115	46168
4347	3-ethylphenylsulfate	Xenobiotics	Benzoate Metabolism	36848	LC/MS Neg	100001808	3530	201.023			C14386	HMDB62721	186352	242708	206895	109547	257335	185259	442949	653721	500720	164466	193026	138376	197902	254592	250359	323061	435405	482273	158473	186725	171514	153521	182757	171578
4576	3-formylindole	Xenobiotics	Food Component/Plant	62863	LC/MS Pos Early	100020219	2736	146.06	10256	487-89-8	C08493	HMDB29737	1248030	1335101	1526921	2140740	2395875	2202920	1250732	1412903	1344623	2542362	2406881	2079847	1747620	1.90229e+06	1779787	1.86783e+06	1.8239e+06	1675027	1784437	1559644	1912741	2.06266e+06	2128181	1775821
363	3-hydroxy-2-ethylpropionate	Amino Acid	Leucine, Isoleucine and Valine Metabolism	32397	LC/MS Neg	100001170	975	117.056	188979	4374-62-3		HMDB00396	1.29601e+06	1217059	1446142	849295	910477	702040	1022678	830264	643255	1259391	1025733	1040176	1478972	1257570	1104167	1123606	1084938	958316	1299034	850050	1116044	1121148	1036471	1015950
5836	3-hydroxy-2-methylpyridine sulfate	Xenobiotics	Chemical	63227	LC/MS Neg	100020975	1849	188.002					155679	237657	304860	478924	629560	688383	290734	329635	324336	397610	465683	419091	127989	136913	156674	48710	50485	66742	51466	52152	70272	96217	150442	165161
3047	3-hydroxy-3-methylglutarate	Lipid	Mevalonate Metabolism	531	LC/MS Polar	112	2850	161.046	1662	503-49-1	C03761	HMDB00355	3969350	4019260	4368558	6363819	5629809	4099411	5142015	4851249	4703482	6623420	4744305	4507827	4786125	7064419	5242712	6582894	7119462	5.25123e+06	3.90348e+06	3455403	3624301	4088585	4256815	5179652
1591	3-hydroxyadipate*	Lipid	Fatty Acid, Dicarboxylate	62069	LC/MS Polar	100004396	3131	161.046	151913			HMDB00345	639906	656661	857659	529009	420223	483270	714251	712652	561924	953127	755641	739437	688259	691557	584856	738739	777803	613421	892411	761031	720387	1.94231e+06	1493044	1.69632e+06
1897	3-hydroxyarachidate*	Lipid	Fatty Acid, Monohydroxy	61701	LC/MS Neg	100019893	5950	327.291	5282918				76359	100948	105741	83385	79238	128979	86527	72920	66370	104789	115333	82064	66791	71624	68608	95728	116913	85798	72312	46853	51797	86241	74641	96996
1848	3-hydroxybutyrate (BHBA)	Lipid	Ketone Bodies	542	LC/MS Polar	254	1480	103.04	441	625-72-9	C01089	HMDB00357	15350020	18799624	13450305	11746088	16567995	9062207	11684958	12801158	4917250	15027158	24689222	15813553	31386448	26232468	13782698	12776207	18482718	4807967	25794672	24390644	28875032	25671796	18234556	19684060
1749	3-hydroxybutyroylglycine	Lipid	Fatty Acid Metabolism (Acyl Glycine)	62064	LC/MS Pos Early	100020211	978	162.076					436784	585513	682278	929577	982931	652213	392603	372407	264541	461089	550303	540567	992747	1157468	957981	362113	544583	288250	1411797	1577877	788609	431132	337893	351498
4433	3-hydroxycotinine glucuronide	Xenobiotics	Tobacco Metabolite	43470	LC/MS Neg	100004494	1745	367.115	183115	132929-88-5		HMDB01204							60072	49122	39669
1888	3-hydroxydecanoate	Lipid	Fatty Acid, Monohydroxy	22053	LC/MS Neg	100000997	4634.7	187.134	26612	5561-87-5		HMDB02203	854964	571177	887119	537240	452213	538855	562141	456831	415863	889789	1.03614e+06	982183	1.00172e+06	790085	614003	960743	927994	793601	1992667	990898	1165893	2902742	1776867	1724334
1838	3-hydroxydecanoylcarnitine	Lipid	Fatty Acid Metabolism (Acyl Carnitine, Hydroxy)	63358	LC/MS Pos Late	100021141	961	332.243				HMDB61636	1278787	528075	965513	394506	232475	505709	670307	438469	498175	781579	891360	1075904	2637811	1676254	1296260	1459784	1209931	1587452	2689544	1253530	2601905	3881656	1202809	1069564
1885	3-hydroxyhexanoate	Lipid	Fatty Acid, Monohydroxy	53230	LC/MS Polar	100006367	1082	131.071	151492	10191-24-9			1510792	1371204	2119905	729647	681977	684499	1318613	917867	969747	1.61731e+06	1727189	1.71671e+06	2101463	1.62137e+06	1483184	1614160	1470942	1733788	1973271	1326549	1545445	2902102	1986406	1.99427e+06
1831	3-hydroxyhexanoylcarnitine (1)	Lipid	Fatty Acid Metabolism (Acyl Carnitine, Hydroxy)	62557	LC/MS Pos Early	100020825	2918	276.181					263652	355960	387267		284834	274124	237103	192936	212197	335404	298751	188316	393385	394496	262568	302204	296590	245443	400742	398330	344697	383989	189807	251896
4300	3-hydroxyhippurate	Xenobiotics	Benzoate Metabolism	39600	LC/MS Neg	100002122	1687	194.046	450268	1637-75-8		HMDB06116	622757	1058600	741198	1293210	3.53882e+06	1.934e+06	897438	1224236	562820	607634	1496278	1739930	4080747	7368628	4500391	169358	408859	427217	2.08722e+06	3275606	2209401	3.71464e+06	7962733	7.87284e+06
4301	3-hydroxyhippurate sulfate	Xenobiotics	Benzoate Metabolism	62530	LC/MS Neg	100020410	1047	274.003	186339					32745	21822	99726	179261	99825	62354	69688	29164	55046	94302	103195	132270	223649	127698				99326	120207	120311	153788	254844	250746
383	3-hydroxyisobutyrate	Amino Acid	Leucine, Isoleucine and Valine Metabolism	1549	LC/MS Polar	111	1619	103.04	87	2068-83-9	C06001	HMDB00336	12569548	13441449	10590699	12027166	10487993	5726423	17991772	12035150	5992348	21088370	10713683	8754776	16099739	13787785	7472224	13804639	10981143	5507535	12413514	8951860	4302489	9496894	10621819	13457590
1891	3-hydroxylaurate	Lipid	Fatty Acid, Monohydroxy	32457	LC/MS Neg	100001112	5175	215.165	94216	53941-38-1		HMDB00387	828892	512866	688101	216429	286464	310780	394632	361909	251532	597365	951885	744647	934844	804887	466550	1009414	995812	842483	2.04952e+06	1.01164e+06	1.75566e+06	1523846	799968	805128
1886	3-hydroxyoctanoate	Lipid	Fatty Acid, Monohydroxy	22001	LC/MS Neg	100000773	3446	159.103	26613	88930-08-9		HMDB01954	440066	318204	552963	276205	278359	398272	213429	167374	200387	497019	672482	575639	518891	379664	340758	429830	506410	436810	720703	426300	579863	2820675	1903195	1834947
1896	3-hydroxyoleate*	Lipid	Fatty Acid, Monohydroxy	61843	LC/MS Neg	100019966	5508	297.243					1436349	1679577	2568337	1057621	1127951	1476909	925896	730247	497834	1.90265e+06	2392554	2617891	2745423	1256115	1572870	1591514	1252295	1112270	4731786	1785794	1977294	3849432	2369486	2351995
5806	3-hydroxypyridine sulfate	Xenobiotics	Chemical	48448	LC/MS Neg	100006098	1595.5	173.987		1955-23-3			1494802	1680695	1820304	4492941	5453941	4952463	11380739	12870843	13964588	7207853	8311855	7167994	1152922	1419806	1447224	1042841	1097771	1178743	3580930	3882102	4262687	4130875	5322178	5040991
1890	3-hydroxysebacate	Lipid	Fatty Acid, Monohydroxy	31943	LC/MS Neg	100001145	1282	217.108	3017884	73141-46-5		HMDB00350	82662	56583	73627			75467	68098	74449	38249	121471	157244	137736	120944	97154	56225	100891	82829	60622	243188	121015	87835	411023	317865	341731
4849	3-hydroxystachydrine*	Xenobiotics	Food Component/Plant	62062	LC/MS Pos Early	100020203	1049	160.097	442640				822153	811006	939018	99105	127238	101822		93511	73217	230868	338283	322055	2102435	2314117	1.99998e+06	61516668	45542748	26510334	12724264	12221701	12229690	2.04144e+06	1540321	2028590
1895	3-hydroxystearate	Lipid	Fatty Acid, Monohydroxy	52938	LC/MS Neg	100008933	5674	299.259	5282907	45261-96-9			1467589	1432371	1301568	871841	1063024	1055204	1505072	1083274	740947	1411673	1957991	1426465	1.54811e+06	1.58525e+06	903549	1.49284e+06	1686950	1290875	1784491	1861488	1323578	1.73729e+06	1325386	1417739
4990	3-indoleglyoxylic acid	Xenobiotics	Food Component/Plant	63583	LC/MS Neg	100020372	2140	188.035	73863	1477-49-2			150096	58288	164378	149222	115295	145144	150048	76593	123274	166251	116937	168781	96795	82999	134536	171720	83163	217885	165264	30707	190580	179180	102677	105311
293	3-indoxyl sulfate	Amino Acid	Tryptophan Metabolism	27672	LC/MS Neg	100000467	2222.2	212.002	10258	2642-37-7		HMDB00682	45536740	48197488	42415828	48059360	68517384	62856852	57497548	52432208	34231320	85063672	110180936	76752592	30667902	41002928	34559784	52908072	61340540	56350732	45145756	48688344	55628164	88568520	99851968	100312424
4366	3-methoxycatechol sulfate (1)	Xenobiotics	Benzoate Metabolism	48763	LC/MS Neg	100006375	2163	218.997					283269	294897	317577	1790427	2591908	2218437	659058	711231	626540	783304	1085195	943072	1342228	2251624	2226524	2.02059e+06	2900602	3143425	443167	579576	663087	415580	602470	577360
4367	3-methoxycatechol sulfate (2)	Xenobiotics	Benzoate Metabolism	48752	LC/MS Neg	100006376	2200	218.997					127537	133987	127036	445749	574364	465341	670942	716800	480697	786726	1142732	1057301	73626	144772	136502	179809	341950	372573	117253	151215	186097	477107	611213	637537
196	3-methoxytyramine sulfate	Amino Acid	Tyrosine Metabolism	44618	LC/MS Neg	100004634	1722	246.044					123324	128693	164552	121424	137036	111162	130448	128217	108200	79452	72238	64818	110793	100812	70354	167006	155523	133996	118039	103054	124138	182178	198372	195424
194	3-methoxytyrosine	Amino Acid	Tyrosine Metabolism	12017	LC/MS Pos Early	1342	2555	212.092	1670	300-48-1		HMDB01434	476923	475650	487402	375396	364699	412636	463624	363858	358222	384916	388174	319750	391141	421060	395390	563908	554124	590140	565170	456360	535051	548912	581810	508190
4332	3-methyl catechol sulfate (1)	Xenobiotics	Benzoate Metabolism	46165	LC/MS Neg	100004112	2790	203.002					721671	858817	1017834	5395029	6795374	6.1761e+06	1949724	2185052	2026483	3415540	3827913	3.6984e+06	307101	409203	372660	4008928	4984653	5112065	1427311	1628763	1900588	3429450	3.69616e+06	3964142
4333	3-methyl catechol sulfate (2)	Xenobiotics	Benzoate Metabolism	46164	LC/MS Neg	100004110	2860	203.002							19221	252559	366324	296138	77006	87962	80176	88356	117032	82237				55916	84887	93149	26481	32797	38317	70881	89540	102497
378	3-methyl-2-oxobutyrate	Amino Acid	Leucine, Isoleucine and Valine Metabolism	44526	LC/MS Polar	100000936	911	115.04	49	3715-29-5	C00141	HMDB00019	23552220	33217318	23240724	21893892	30695594	16954160	26561144	32833780	15031179	22820708	25421672	16386273	34932944	42357984	22313144	25840232	34836300	17135262	30919336	33924968	20703642	20027712	23575172	25809536
354	3-methyl-2-oxovalerate	Amino Acid	Leucine, Isoleucine and Valine Metabolism	15676	LC/MS Neg	100000036	2064.2	129.056	47	1460-34-0;51829-07-3	C00671	HMDB03736	32709798	51452544	37801064	36594208	57447648	30553228	43543692	43798604	26189752	33821680	39195296	26581614	61175920	61644216	43820964	46023888	49274368	31489152	46042816	50731992	28587736	28863190	39651936	37963340
1592	3-methyladipate	Lipid	Fatty Acid, Dicarboxylate	36749	LC/MS Polar	100001765	2865	159.066	12292	3058-01-03		HMDB00555	244582	167862	238272	116282	182358					258909	401194	176344		257212	171015				389595	344096	280295	180146	225717	94053
4098	3-methylcytidine	Nucleotide	Pyrimidine Metabolism, Cytidine containing	35132	LC/MS Pos Early	100001466	2176	258.108	159649	21028-20-6			199080	224206	278831	226026	273242	215548	191950	199282	129198	196515	205301	183174	138260	147439	137847	221574	247768	165348	210073	239246	164259	250623	240839	220504
330	3-methylglutaconate	Amino Acid	Leucine, Isoleucine and Valine Metabolism	57747	LC/MS Polar	100002458	2700	99.0452	1551553	5746-90-7		HMDB00522	1.03669e+06	947329	1.0033e+06	806559	787274	759124	869433	708760	584714	916420	826719	688952	911858	1114125	817415	702027	805228	503469	1460368	1318619	1377952	891853	716797	773087
338	3-methylglutarylcarnitine (2)	Amino Acid	Leucine, Isoleucine and Valine Metabolism	46548	LC/MS Pos Early	100005850	2687	290.16	128145			HMDB00552	820936	941307	979753	236752	375518	286883	408546	385484	318457	611256	700961	583767	379838	476226	293505	350356	487958	346632	1906020	1716565	1771670	306958	361574	359961
69	3-methylhistidine	Amino Acid	Histidine Metabolism	15677	LC/MS Neg	100000042	906.3	168.078	64969	368-16-1	C01152	HMDB00479	2218382	2251794	3103477	1258148	1308505	1574626	11939475	10313226	11156016	13206630	12269398	13218870	404711	452650	492894	1151142	1259369	1378844	12510338	10811648	14417474	3460412	3255691	3332730
4420	3-methylxanthine	Xenobiotics	Xanthine Metabolism	32445	LC/MS Pos Early	100001108	1415	167.056	70639	1076-22-8	C16357	HMDB01886	176317	200639	197276	846124	888580	899542	765873	701885	602742	393866	419043	338073	2853803	3.10742e+06	2880714	584316	707524	547788	799379	711798	656444	1404686	1461033	1396256
4399	3-phenylpropionate (hydrocinnamate)	Xenobiotics	Benzoate Metabolism	15749	LC/MS Neg	100000010	2860	149.061	107	501-52-0	C05629	HMDB00764	790854	487294	724736	1356004	885065	1845953	1370083	825918	1068793	1982940	1693152	4300246	38828	97478	46113	500970	507841	701839	1.00586e+06	976102	1924070	2361200	1833255	1712690
4084	3-ureidopropionate	Nucleotide	Pyrimidine Metabolism, Uracil containing	3155	LC/MS Pos Early	1053	875	133.061	111	462-88-4	C02642	HMDB00026	478475	433617	373606	867084	898928	787883	669186	619692	598316	820758	857731	768811	1438288	1404875	1300428	708008	880868	628536	859238	704890	609034	1.9069e+06	1.81238e+06	1944525
3388	3b-hydroxy-5-cholenoic acid	Lipid	Secondary Bile Acid Metabolism	43507	LC/MS Neg	100004182	5205	373.275	92997	5255-17-4		HMDB00308				48663	51092	71797							138947	176239	146455	28000	34619	33422	16279	24163	39688	41122	39563	49343
3078	3beta,7alpha-dihydroxy-5-cholestenoate	Lipid	Sterol	36803	LC/MS Neg	100001611	5275	431.317	3081084	115538-84-6	C17335		159214	102688	224670	195204	248715	106131	146066	173810	329845	93436	243636	204124	254393	317177	400597	305894	275573	182944	502910	620403	282413	705391	254100	414067
3079	3beta-hydroxy-5-cholestenoate	Lipid	Sterol	54805	LC/MS Neg	100006370	5398	415.322	165511	6561-58-6	C17333		203205	283032	245424	283961	478699	493778	468046	503833	316266	225105	319957	170022	433431	646430	425102	532221	796830	512000	944520	817369	916258	1022180	936260	963028
5820	4-acetamidobenzoate	Xenobiotics	Chemical	57585	LC/MS Neg	100009413	1403	178.051	19266	556-08-1	D03836					75799	79455	71515	68389	67135	54002	35699		43221	41519	22925	38947	26091	25723	37534			26196
511	4-acetamidobutanoate	Amino Acid	Polyamine Metabolism	1558	LC/MS Pos Early	1113	1350	146.081	18189	3025-96-5	C02946	HMDB03681	1957629	1810553	1907396	2849843	2698298	2435521	2751060	2646385	1.8687e+06	2899085	2550982	2249623	2988498	3294069	2429255	2509575	3.27595e+06	2265856	2640480	2073486	2368822	3508941	3.65905e+06	2986293
4345	4-acetylphenyl sulfate	Xenobiotics	Benzoate Metabolism	44620	LC/MS Neg	100000711	2375	215.002	4684006				122659	168252	175576	180631	273625	289948	443266	481771	376108	268744	379839	407369	115303	149100	130967	110341	151417	174417	80317	80229	102363	101747	153812	161928
4336	4-allylcatechol sulfate	Xenobiotics	Benzoate Metabolism	63597	LC/MS Neg	100020578	3571	229.018					1301262	1345565	1099407	1957285	2572003	2752744	2175700	2285382	1.67075e+06	2642082	2364856	1.8517e+06	1.75155e+06	2443509	2414361	707763	906986	943414	889377	1041473	1200852	1330048	1553445	1633192
4872	4-allylphenol sulfate	Xenobiotics	Food Component/Plant	37181	LC/MS Neg	100001868	3805	213.023					5232367	5597686	5702097	1528824	1915147	1681797	5021003	5308008	4475602	878367	932924	793322	977709	1205841	1072095	1889992	2036692	1921536	1937470	2.02685e+06	2100259	2742494	2812271	2850492
5848	4-chlorobenzoic acid	Xenobiotics	Chemical	63988	LC/MS Neg	100021784	3015	154.99		74-11-3					101318	34625		48193					67822	33310		29538	37584		41104	33052	80164	34755	43772			30166
3089	4-cholesten-3-one	Lipid	Sterol	38125	LC/MS Pos Late	100002227	2520	385.346	91477	601-57-0	C00599	HMDB00921	212823	206808	240796	172398	403316	389033	369890	124030	196457	271864	328290	178317	277423	500337		801406	657786	683132			406627	384980	297173	444527
4334	4-ethylcatechol sulfate	Xenobiotics	Benzoate Metabolism	63072	LC/MS Neg	100020536	3379	217.018					887021	1141924	1251984	1838876	2299701	2104037	3506257	3794813	2879263	3378922	4090079	3.95372e+06	1265031	1702078	1479183	697627	983175	894467	1931650	2147466	2471858	1687939	1905574	2002120
4349	4-ethylphenyl sulfate	Xenobiotics	Benzoate Metabolism	36099	LC/MS Neg	100001756	3580	201.023	20822574	123-07-9	C13637	HMDB62551	3.42808e+06	3.90312e+06	3.94744e+06	2031997	2.46083e+06	2.23278e+06	5360824	5.51276e+06	4.47317e+06	2837653	3100247	2.20212e+06	2528405	3063472	2.56264e+06	4090743	4.60604e+06	4.14741e+06	2.84609e+06	3.09405e+06	3213549	2997015	2.96536e+06	3153193
514	4-guanidinobutanoate	Amino Acid	Guanidino and Acetamido Metabolism	15681	LC/MS Pos Early	100000096	2320	146.092	500	463-003;463-00-3	C01035	HMDB03464	2734627	1753634	3434786	2643914	1.66751e+06	2539244	4483922	2783689	5446147	2587892	1788947	3064144	2716344	2001554	2.75896e+06	2458525	2324895	3.51904e+06	818051	629612	1712898	9866956	3331341	3.07506e+06
5798	4-hydroxychlorothalonil	Xenobiotics	Chemical	48441	LC/MS Neg	100006082	4427	244.908	34217	28343-61-5			1376596	1.39574e+06	1.49712e+06	1367562	1602626	1543840	1.48026e+06	1.55351e+06	1341370	1233077	1351893	1234948	643711	669329	546321	1715477	1.80987e+06	1657128	1541695	1456456	1534162	997566	998203	1067655
5344	4-hydroxycoumarin	Xenobiotics	Drug - Cardiovascular	37445	LC/MS Neg	100002049	2470	161.024	54682930	1076-38-6	C20414		346217	353435	536581	307860	338235	431565	176316	140130	141752	336127	312553	346520	145306	156127	151283	368427	300107	418705	119245	83535	95993	385025	375404	394984
48	4-hydroxyglutamate	Amino Acid	Glutamate Metabolism	40499	LC/MS Pos Early	100002544	1141	164.055	439902	2485-33-8	C03079	HMDB01344	178038	154910	184079	178207	209511	124510	113262	139632	132698	218174	232329	155094	77446	85879	53103	88876	129767	44024	93602		53696		60955	68528
4302	4-hydroxyhippurate	Xenobiotics	Benzoate Metabolism	35527	LC/MS Neg	100001423	1475	194.046	151012	2482-25-9		HMDB13678	636185	871879	724959	840055	1674407	1212731	976881	1205511	1.00006e+06	437409	653204	611697	4770525	6646084	4643829	1103445	1680806	1398664	523420	669619	627183	667548	988583	973869
152	4-hydroxyphenylacetate	Amino Acid	Phenylalanine Metabolism	541	LC/MS Neg	144	1361	151.04	127	156-38-7	C00642	HMDB00020	223142	303228	372371	145033	241551	182100	265489	209442	245103	118801	174318	106528	286568	258868	205794	181749	216134	155994	154173	174982	157356	205622	254470	243915
1126	4-hydroxyphenylacetylglutamine	Peptide	Acetylated Peptides	55017	LC/MS Neg	100010850	1650	279.099					91609	136840	128676	77302	171396	108175	78855	69570	28589	40178	58675	25074	58474	90548	51683	67775	83724	62822	26906	31117	41252	61109	78872	83777
166	4-hydroxyphenylpyruvate	Amino Acid	Tyrosine Metabolism	1669	LC/MS Neg	1141	1690	179.035	979	156-39-8	C01179	HMDB00707	938940	1825478	897101	1252484	3.43823e+06	1195452	2404100	3.01335e+06	1375893	1.01198e+06	2471783	507587	2734239	4825038	1367028	1684869	3179443	722906	1033602	1.99542e+06	517871	759442	1.44796e+06	1713033
91	4-imidazoleacetate	Amino Acid	Histidine Metabolism	32349	LC/MS Pos Early	100001207	2055	127.05	96215	645-65-8	C02835	HMDB02024	429797	529199	702369	481453	380735	655691	416057	548706	680901	435191		287702	422052	290915	582242	586651	410485	514958	411816	259884	420156	1219908	903095	1.04661e+06
183	4-methoxyphenol sulfate	Amino Acid	Tyrosine Metabolism	48457	LC/MS Neg	100006262	2412	203.002		3233-60-1			557144	552357	464337	224619	340878	216748	2385587	2638186	1969624	1168765	1508831	1100365	166566	307555	219524	934483	1205611	1028217	366381	477780	437292	646442	841550	814296
307	4-methyl-2-oxopentanoate	Amino Acid	Leucine, Isoleucine and Valine Metabolism	22116	LC/MS Neg	100000551	2170	129.056	70	816-66-0	C00233	HMDB00695	54519772	89615752	63150068	58435920	100366840	55714276	74122320	77869352	43237088	53784464	63936016	41927152	92372992	98351856	66742688	71298616	84770280	54346472	76193016	86626032	48079032	50141608	71358032	67281504
4335	4-methylcatechol sulfate	Xenobiotics	Benzoate Metabolism	46146	LC/MS Neg	100004111	2665	203.002					6149400	6916504	7.50634e+06	14175486	17492340	14477737	16059181	16176226	12029474	32233170	36252732	27212898	5182667	6810803	6272379	11318509	14243339	14229221	12383049	13621889	14088590	16631366	17720698	18329500
4330	4-methylguaiacol sulfate	Xenobiotics	Benzoate Metabolism	48418	LC/MS Neg	100006105	2978	217.018		756760-43-7			115358	159321	194692	429786	621043	525925	269902	358179	308629	578901	743127	551544	72683	105572	93088	120844	149806	166752	183886	187185	220355	173609	230714	235769
1705	4-methylhexanoylglutamine	Lipid	Fatty Acid Metabolism (Acyl Glutamine)	62735	LC/MS Neg	100020631	3390	257.151					40316	33079	59946								40961	19742				15709			65041	52846	29162	44585	34844	33815
1774	4-methylnonanoylcarnitine	Lipid	Fatty Acid Metabolism (Acyl Carnitine, Medium Chain)	63612	LC/MS Pos Late	100021138	1055	316.248					102976	98582	123278	56726	181141	114750	113137	135839	78498	47404	91694	73413		104903	98944	120533	221546	168772	117759	199293	151233		78146	77735
4898	4-vinylguaiacol sulfate	Xenobiotics	Food Component/Plant	48442	LC/MS Neg	100006126	3354	229.018					186144	258112	548052	378225	449485	538245	1351981	2246742	2209240	180327	186832	246011	33317	99014	119194	282029	421224	569286	80266	128858	256102	87110	118082	153483
4351	4-vinylphenol sulfate	Xenobiotics	Benzoate Metabolism	36098	LC/MS Neg	100001755	3320	199.007	6426766	2628-17-3	C05627	HMDB62775	893706	1017827	1066543	16918636	21741188	21372660	11363921	11732764	10474597	7588018	8363387	6822168	5690826	7224532	6541503	5734366	6624868	6494404	6060186	6727784	7.47848e+06	9356805	9937594	10514924
4121	5,6-dihydrothymine	Nucleotide	Pyrimidine Metabolism, Thymine containing	1418	LC/MS Neg	158	1637.8	127.051	93556	696-04-8	C00906	HMDB00079	132887	211623	132683	126623	173715	117168	210481	379429	153057	172515	211585	81589	194871	293424	132070	225115	271720	118186	216981	244979	201482	214142	225450	245467
4068	5,6-dihydrouridine	Nucleotide	Pyrimidine Metabolism, Uracil containing	61833	LC/MS Neg	100001425	1119	245.078	94312	5627-05-04			2212591	2263422	2157428	3203690	3158412	3395729	3613241	2939767	2483899	3318066	3251064	2398165	3117557	3424239	2514006	3294798	2947718	3240438	2921746	2333790	3595677	3678950	3377825	3404859
113	5-(galactosylhydroxy)-L-lysine	Amino Acid	Lysine Metabolism	43582	LC/MS Pos Early	100002462	2755	325.161	123986	32448-36-5			224189	212438	248652	260195	270698	251191	349843	208302	163372	240833	277460	181774	239964	231255	174828	289347	209995	240074	271499	190795	230329	159244	303904	184383
4422	5-acetylamino-6-amino-3-methyluracil	Xenobiotics	Xanthine Metabolism	34424	LC/MS Polar	100001403	1710	197.068	88299	1196153-01-1	C16366	HMDB04400	1844106	1913273	2.61633e+06	9392420	9889565	8826478	4153647	3754707	3350825	7937699	7568175	8434413	2823108	3448067	3576649	2.47567e+06	2764080	2450151	5534513	5017591	5766671	5905149	5126644	5747272
4423	5-acetylamino-6-formylamino-3-methyluracil	Xenobiotics	Xanthine Metabolism	34401	LC/MS Polar	100001402	1424	225.063	108214	85438-96-6	C16365	HMDB11105	400454	632655	357956	1105871	1536431	1083417	513884	384292	271705	579398	886272	474474	706127	869651	767589	529029	982345	723546	508944	775690	297287	374984	578588	525366
1429	5-dodecenoate (12:1n7)	Lipid	Medium Chain Fatty Acid	33968	LC/MS Neg	100001232	5224	197.155	5312378	2430-94-6		HMDB00529	3509512	2292332	2088246	579394	1296883	408606	597448	1.42696e+06	1076583	2221057	3082212	2580822	2236099	3179126	1803782	2071841	3099316	1518836	5219702	3749839	5692137	3112669	3389657	3831540
1795	5-dodecenoylcarnitine (C12:1)	Lipid	Fatty Acid Metabolism (Acyl Carnitine, Monounsaturated)	61769	LC/MS Pos Late	100016069	1135	342.264				HMDB13326	1361692	825121	982550	296537	355042	448214	313283	372347	387786	557914	1359924	981638	1130655	1273335	1091957	1347324	1417972	1596716	3310898	1944054	3579601	2378324	981953	1086525
5834	5-hydroxy-2-methylpyridine sulfate	Xenobiotics	Chemical	63230	LC/MS Neg	100020973	2074	188.002					81891	126796	215076	9847161	15288885	20091062	164273	176598	225277	132057	195287	163283	55916	103137	129333	25722	21180	43767	57102	72369	98440	74535	133860	145303
1901	5-hydroxyhexanoate	Lipid	Fatty Acid, Monohydroxy	31938	LC/MS Neg	100001148	1267	131.071	170748	44843-89-2		HMDB00525	153641	189261	182777	86320		119950	250545	228612	201624	131021	239050	134267	130440	159715	158158	135754	73007	129839	281818	219402	216718	237970	109272	120263
291	5-hydroxyindole sulfate	Amino Acid	Tryptophan Metabolism	52914	LC/MS Neg	100009042	1928	212.002						39050			52069	28331	54210	49805		161254	175874	127726		37771			48032	78729				100898	93374	103546
274	5-hydroxyindoleacetate	Amino Acid	Tryptophan Metabolism	437	LC/MS Neg	71	1510.2	190.051	1826	54-16-0	C05635	HMDB00763			58788			28913	176370	179459	256637	25157	39346		244239	181755	217593	151257	115532	123535			67316	122869	206911	194509
112	5-hydroxylysine	Amino Acid	Lysine Metabolism	15685	LC/MS Pos Early	100000054	2790	163.108	1029	13204-98-3	C16741	HMDB00450	517397	437775	560147	1654681	1281329	1464993	607615	601052	705578	946712	839387	882213	413203	662259	556988	605293	558468	546573	536751	490767	627216	739513	742052	695856
507	5-methylthioadenosine (MTA)	Amino Acid	Polyamine Metabolism	1419	LC/MS Pos Early	212	2752	298.097	439176	2457-80-9	C00170	HMDB01173	382263	451809	394748	424971	599349	400465	554706	513851	344183	435111	481422	389355	563220	540232	457918	640442	650707	501864	461154	455038	479315	597684	632426	551361
402	5-methylthioribose	Amino Acid	Methionine, Cysteine, SAM and Taurine Metabolism	62100	LC/MS Pos Early	100002103	790	181.053	494	23656-67-9		HMDB01087	1408627	1450302	1846179	1673278	1800296	1.87067e+06	1620904	1316443	1295598	1720639	1.71179e+06	1262886	1.72436e+06	1964300	1536952	1850143	1667659	1778649	2.0829e+06	2104813	1923291	1459744	1412600	1483418
4070	5-methyluridine (ribothymidine)	Nucleotide	Pyrimidine Metabolism, Uracil containing	35136	LC/MS Neg	100001446	1778.1	257.078	445408	1463-10-1		HMDB00884	599455	550178	643201	687875	768897	772523	637005	579876	502182	679104	695248	632595	545585	665568	564216	584611	604676	594616	773204	772514	823409	621159	618278	590190
530	5-oxoproline	Amino Acid	Glutathione Metabolism	1494	LC/MS Pos Early	1021	1000	130.05	7405	98-79-3	C01879	HMDB00267	56060816	64641600	57893912	43638608	51295984	38419376	55634920	64020312	47159280	53831884	58226032	42067264	48293128	64499040	44211928	52293496	82678272	52755240	61385060	66518440	56633788	54321888	61141032	60337432
3217	5alpha-androstan-3alpha,17alpha-diol monosulfate	Lipid	Androgenic Steroids	37183	LC/MS Neg	100002008	5208	371.19					127233	141706	131832	258843	341619	317112	122929	118644	99072	100345	111502	100195	99536	57976	52387	64757	76970	66471	85770	53894	100081	195164	180508	190088
3240	5alpha-androstan-3alpha,17beta-diol 17-glucuronide	Lipid	Androgenic Steroids	47132	LC/MS Neg	100005396	4930	467.265					109864	102108	127211	78507	109351					36812	34773	38169			30938	33137	39598	37056		49673	48065	53093	89239	59189
3239	5alpha-androstan-3alpha,17beta-diol disulfate	Lipid	Androgenic Steroids	37184	LC/MS Neg	100002017	4275	225.07					250920	267947	264263	154675	197597	171565	237763	243321	211738	57970	66556	44569	550343	606392	521025	323752	347886	321759	133301	106939	112398	105121	82077	95376
3237	5alpha-androstan-3alpha,17beta-diol monosulfate (1)	Lipid	Androgenic Steroids	37186	LC/MS Neg	100002018	4925	371.19					941793	1122754	993702	852260	1185613	786224	494145	585424	391829	361637	445288	292599	277285	415226	240084	264982	365438	246060	203860	233517	190204	772139	852127	909925
3238	5alpha-androstan-3alpha,17beta-diol monosulfate (2)	Lipid	Androgenic Steroids	37185	LC/MS Neg	100006005	5080	371.19					242920	330641	308570	559632	829074	843210	1.85688e+06	2099714	1.80438e+06	572276	560766	511906	4490709	5212621	4339179	1.69554e+06	1918488	1766096	728207	803370	788771	853134	816908	772906
3248	5alpha-androstan-3beta,17alpha-diol disulfate	Lipid	Androgenic Steroids	37187	LC/MS Neg	100002021	4215	225.07					515666	551658	573951	1701731	2185231	1972344	438069	423847	332869	367104	393967	313716	465081	531556	468080	118548	114477	111701	353638	361624	372119	229614	227150	224585
3245	5alpha-androstan-3beta,17beta-diol disulfate	Lipid	Androgenic Steroids	37190	LC/MS Neg	100001987	3880	225.07	242332	571-20-0	C12525	HMDB00493	13635858	14131002	14673368	5129045	6340904	5778406	4211288	4421538	3743189	2295586	2683905	2219583	9047126	10642863	9420862	3867194	4252897	4109870	1572595	1607320	1656568	3570765	3604605	3622884
3244	5alpha-androstan-3beta,17beta-diol monosulfate (2)	Lipid	Androgenic Steroids	37192	LC/MS Neg	100002024	4685	371.19					468174	542333	489704	576059	786459	559715	296698	332419	235054	251260	291860	212759	197041	255061	162563	182750	237922	170264	112002	120076	111126	532782	584721	599265
3149	5alpha-pregnan-3beta,20alpha-diol disulfate	Lipid	Progestin Steroids	37198	LC/MS Neg	100001988	3962	239.085					603826	669710	745094	1760158	2363047	2104747	1473049	1629008	1394524	853382	889362	814249	1966809	2311976	2096871	509898	581851	529796	1650757	1817357	1924930	567347	654367	640149
3143	5alpha-pregnan-3beta,20alpha-diol monosulfate (2)	Lipid	Progestin Steroids	37200	LC/MS Neg	100002014	5060	399.221					78001	75381	77103	646094	799038	713261	438124	468382	378352	321360	354097	292153	804956	924505	769083	126747	135508	119498	662227	648676	637301	309892	297314	321394
3140	5alpha-pregnan-3beta,20beta-diol monosulfate (1)	Lipid	Progestin Steroids	37196	LC/MS Neg	100002009	5180	399.221					46682	44615	51550	288806	388260	329321	144076	187491	146219	116052	147309	111440	380168	449146	368080	104359	108693	71170	567861	501637	461520	124598	132492	126114
3139	5alpha-pregnan-3beta-ol,20-one sulfate	Lipid	Progestin Steroids	37480	LC/MS Neg	100002035	5136	397.205		7730-00-9						96422	88586	180808	108342	39886	60122	52042	25005	22360	141442	154838	142259				122968	68539	109059			39551
3150	5alpha-pregnan-diol disulfate	Lipid	Progestin Steroids	46172	LC/MS Neg	100002015	4310	239.085	5127902				29445	39640	29254	72564	85323	58362	38796	30136	24425	25733	25857		48381	49109	33980	37727	39828	33503	163702	130381	116300		14493
297	6-bromotryptophan	Amino Acid	Tryptophan Metabolism	62503	LC/MS Neg	100020414	3565	280.993					223468	209856	246439	223161	239254	275537	174234	136979	144394	166286	141847	101008	209641	225656	239929	262703	234355	259248	352747	317248	385253	273145	251240	260270
5817	6-hydroxyindole sulfate	Xenobiotics	Chemical	48698	LC/MS Neg	100006260	2498	212.002	122198196				1789854	1841197	1742776	1637285	2308329	1776224	1913692	1803985	1241340	3227001	4253496	3335602	1.00073e+06	1203933	1226173	1832427	2311885	2043405	2.00831e+06	2170596	2239580	2311010	2650564	2493321
126	6-oxopiperidine-2-carboxylate	Amino Acid	Lysine Metabolism	43231	LC/MS Neg	100004499	965	142.051	3014237	34622-39-4		HMDB61705	576201	628498	746928	498682	643120	420568	506817	495416	506350	712553	634281	612290	936151	846418	819855	540128	713363	421349	736697	690056	638843	360772	352220	359908
3076	7-HOCA	Lipid	Sterol	36776	LC/MS Neg	100001609	5288.1	429.301	3081085	115538-85-7	C17337	HMDB12458	851886	901455	835896	813389	1467456	991666	1231336	1696390	978898	758887	1080250	589875	1197505	1.9248e+06	1.0478e+06	1574419	2401391	1273238	2212573	1980714	1794359	1885711	1771851	1692839
292	7-hydroxyindole sulfate	Amino Acid	Tryptophan Metabolism	52915	LC/MS Neg	100009043	1765	212.002					24100	33061	29507	30562	44961	33861	57648	45276	33256	94375	114424	99730	16768		19029	24856	35176	27538	37612	31941	32964	77344	88929	79122
4033	7-methylguanine	Nucleotide	Purine Metabolism, Guanine containing	35114	LC/MS Pos Early	100001456	2175	166.072	11361	578-76-7	C02242	HMDB00897	1958394	1793191	2149290	2253995	2604468	2281661	2518651	2398886	2099903	1920756	1820504	1642342	2243942	2593157	2298542	2430492	2699097	2393563	2603021	2286950	2516865	2418007	2267290	2223198
4414	7-methylurate	Xenobiotics	Xanthine Metabolism	39598	LC/MS Pos Early	100002241	1321	183.051	69160	612-37-3	C16355	HMDB11107				65328	113254	67038	125418	94676	105011	82959	74423		183208	329343	228794	69700	102063	74613	47347		37887	109522	105568	98812
4421	7-methylxanthine	Xenobiotics	Xanthine Metabolism	34390	LC/MS Pos Early	100001396	1350	167.056	68374	552-62-5	C16353	HMDB01991	218416	234709	286842	827370	985046	837415	1359019	1255632	1076006	807004	807625	664430	3.83526e+06	4653067	4160165	758089	793277	677939	852298	832996	819475	2088334	2188356	2326221
263	8-methoxykynurenate	Amino Acid	Tryptophan Metabolism	62955	LC/MS Neg	100020360	2863	218.046	76230	2929-14-8	C05830	HMDB60426		28677	28350	73062	112699	81997	54574	58825	44188	101705	113683	96895	180693	205534	126331	67758	52425	30224	93140	62138	79731	68560	78879	80532
1937	9,10-DiHOME	Lipid	Fatty Acid, Dihydroxy	38399	LC/MS Neg	179	5180	313.238	9966640	263399-34-4	C14828	HMDB04704	191922	72787	227861	143622	36088	155707	73393	128142	232955	419801	298602	432611	102323	126400	65799	126833	270786	325641	122636	114867	194450	240672	407576	328446
1908	9-hydroxystearate	Lipid	Fatty Acid, Monohydroxy	47120	LC/MS Neg	100005834	5384	299.259	9570127	25498-28-6		HMDB61661	1219585	746746	662673	520950	624027	558672	360998	640271	149046	881348	1308179	1.01478e+06	902437	1292757	667429	629649	814446	266882	1598578	1297475	1340261	1220928	1528640	1508244
4828	acesulfame	Xenobiotics	Food Component/Plant	48569	LC/MS Neg	100006203	1581	161.987	36573	55589-62-3		HMDB33585	821240	1314741	1.62059e+06	54103092	86323632	66671712							2326511	3.26341e+06	3274625				2887445	3399044	3926930	876112	727651	752272
1758	acetylcarnitine (C2)	Lipid	Fatty Acid Metabolism (Acyl Carnitine, Short Chain)	32198	LC/MS Pos Early	100000802	2282	204.123	1	5080-50-2	C02571	HMDB00201	253953600	299700032	174255776	316969024	448840800	194577888	276129184	344821408	104465992	275811232	428971264	181819184	354469120	488332064	176504480	331256192	531961824	172137808	452095520	564623168	242744080	376421440	373282784	372364288
502	acisoga	Amino Acid	Polyamine Metabolism	43258	LC/MS Pos Early	100004541	1813	185.129	129397	106692-36-8			3.88055e+06	4379397	4237753	2833041	2997895	2348107	2432040	2584520	2577755	4492995	4810964	4325335	2215920	2409606	2447137	3750825	4245541	3392950	2258992	2234952	1.93434e+06	5073227	6.6895e+06	6469645
1371	aconitate [cis or trans]	Energy	TCA Cycle	46173	LC/MS Neg	100001359	580	173.009					26200760	31200538	28829068	33363174	37497852	24915068	41341504	39642724	31305072	34760184	35815464	23518476	49656120	49126368	36602312	35583960	38706096	29639252	42019628	34938852	24925376	27824606	34333504	33650664
3986	AMP	Nucleotide	Purine Metabolism, Adenine containing	32342	LC/MS Pos Early	209	1013	348.07	6083	149022-20-8	C00020	HMDB00045	66902		65910	27880	56415	44774	48900	44737	65529	60655	34802	58876	49017	57455	73352	64083	43992	90063	55996		67167	58713	51829	60250
1817	adipoylcarnitine (C6-DC)	Lipid	Fatty Acid Metabolism (Acyl Carnitine, Dicarboxylate)	52988	LC/MS Pos Early	100006614	2570	290.16	71296139			HMDB61677	521025	524916	533637	167552	240735	191343	490064	442185	387623	545602	587591	540438	364920	394560	340497	432704	504214	445681	804396	729252	642474	271206	307020	222364
1500	adrenate (22:4n6)	Lipid	Long Chain Polyunsaturated Fatty Acid (n3 and n6)	32980	LC/MS Neg	100001193	5678	331.264	5497181	2091-25-0	C16527	HMDB02226	5243136	5030403	4234622	2582880	2972948	3676946	3706001	2333875	2107234	5.75587e+06	6686319	3522288	4621240	4977822	3980756	6.52278e+06	5.59185e+06	6060617	11378780	5986512	8704879	7540840	8131386	6177510
28	alanine	Amino Acid	Alanine and Aspartate Metabolism	1126	LC/MS Pos Early	811	1700	90.055	5950	56-41-7	C00041	HMDB00161	713287808	712283072	666111616	706815808	730418944	580484992	729806720	645698240	548239360	645696256	624571904	515426048	768806016	833503680	713250816	673984448	786020480	629282944	918384064	890203072	681368640	730607744	751583104	780873536
3980	allantoin	Nucleotide	Purine Metabolism, (Hypo)Xanthine/Inosine containing	1107	LC/MS Polar	1002	1672	157.037	204	97-59-6	C02350	HMDB00462	2877559	2658904	3154962	2961928	3077711	2497585	4228159	4102402	3525153	2783559	2697275	2916423	2556117	3.57143e+06	2665803	3553847	3.80628e+06	3146236	2868239	2322496	2682700	3.47672e+06	3330792	3912685
4606	alliin	Xenobiotics	Food Component/Plant	41494	LC/MS Pos Early	100003473	1470	178.053	87310	556-27-4	C08265	HMDB33592				1293643	1371040	1457644	310789	321784	322836							831926	715743	948746	388829	213681	364292	330413	230051
4208	alpha-CEHC sulfate	Cofactors and Vitamins	Tocopherol Metabolism	47666	LC/MS Neg	100005972	3090	357.101						57394	121988		275731	81491					22029		120402	116983	87950	48488		41015			38418			23649
4196	alpha-CMBHC glucuronide	Cofactors and Vitamins	Tocopherol Metabolism	63926	LC/MS Neg	100005977	3664	495.224					29443	26257	42596	33169	49985	56875					16611		60754	63931	76010							44487	48677	51115
1867	alpha-hydroxycaproate	Lipid	Fatty Acid, Monohydroxy	37073	LC/MS Neg	100001723	1920	131.071	99824	6064-63-7		HMDB01624	179531	62864		93384	112329		105521			76414	140415					97630	117264		185200			84044	66867	151698
311	alpha-hydroxyisocaproate	Amino Acid	Leucine, Isoleucine and Valine Metabolism	22132	LC/MS Neg	100000706	1840	131.071	83697	10303-64-7	C03264	HMDB00746	847822	958216	687369	1138667	1316662	522404	1364254	1112614	561969	956890	879599	472430	1168964	1197437	538890	1060534	1211030	586251	1307558	868663	560589	653150	842348	808835
379	alpha-hydroxyisovalerate	Amino Acid	Leucine, Isoleucine and Valine Metabolism	46537	LC/MS Polar	100001300	1052	117.056	99823	600-37-3		HMDB00407	45432392	35350836	36069692	57709536	48357504	39837000	73037720	61361276	44312588	42202720	33239156	28786888	45694164	47657048	35985604	52021280	44528720	30304878	53462728	40887648	40315832	52309532	40697868	49757580
409	alpha-ketobutyrate	Amino Acid	Methionine, Cysteine, SAM and Taurine Metabolism	4968	LC/MS Polar	796	940	101.024	58	600-18-0	C00109	HMDB00005	948125	1049107	1323002	833266	667487	472343	839993			1340949	1137454	873240	788219	923701	692149	2305960	1182385		1053196	1190014	510879	482707	826284	845758
44	alpha-ketoglutaramate*	Amino Acid	Glutamate Metabolism	62101	LC/MS Polar	100002397	1916	144.03	48	18465-19-5			2050225	3209858	2655251	1.72209e+06	2748065	1542307	2920192	2880772	1392239	1.84888e+06	2018767	1066268	2597308	4368652	1941645	3509456	4162474	1841416	2923226	3245506	2240632	2318450	2.59819e+06	3025972
1375	alpha-ketoglutarate	Energy	TCA Cycle	528	LC/MS Polar	93	2700	145.014	51	305-72-6;328-50-7;22202-68-2	C00026	HMDB00208	43185212	55779656	46646192	73044144	102878824	51988532	74547920	71929616	33433706	57837044	73027592	38632168	76441832	111196952	57007612	59541384	85071952	34658364	77227632	68108576	41671552	48937764	61597356	71530160
4197	alpha-tocopherol	Cofactors and Vitamins	Tocopherol Metabolism	1561	LC/MS Pos Late	1105	2522	430.378	14985	59-02-9;10191-41-0	C02477	HMDB01893	196009536	191604960	195802304	149800384	163644368	149040848	112698432	126374880	124183640	127363712	127285496	126238552	130640800	134447040	137373440	253671472	243705600	246498288	157885856	162327616	160610608	131744680	134776224	142578112
3252	andro steroid monosulfate C19H28O6S (1)*	Lipid	Androgenic Steroids	32827	LC/MS Neg	100002152	3871	383.153					102175	106833	109087	323518	344092	297435	171845	151830	136587	185056	188884	180636	155407	160959	155101	226685	203210	212942	193793	181427	187193	539472	509993	496198
3226	androstenediol (3alpha, 17alpha) monosulfate (2)	Lipid	Androgenic Steroids	37207	LC/MS Neg	100002026	4712	369.174					242930	285725	267894	557635	682612	569495	397136	411735	327717	454360	557801	375861	520309	690204	484227	338352	421541	287418	805480	721881	474194	737783	910278	896119
3227	androstenediol (3alpha, 17alpha) monosulfate (3)	Lipid	Androgenic Steroids	37209	LC/MS Neg	100002027	5180	369.174					5359886	5728572	5268688	6000016	7435769	7808860	6940625	5255813	5.75525e+06	4180824	3661840	2400091	7066446	8622184	8023274	3364010	4320107	4026557	3502970	3187383	3980604	6.29026e+06	6620461	6338303
3222	androstenediol (3beta,17beta) disulfate (1)	Lipid	Androgenic Steroids	37202	LC/MS Neg	100001992	3740	224.062	87120982		C04295	HMDB03818	43247132	45159212	47075988	26131458	32358020	28963482	18129604	18727440	15962542	22599588	24663374	20775254	17081996	19866588	18013528	23354408	25257074	24341980	21011260	21478210	22206072	26264328	27344704	27743008
3223	androstenediol (3beta,17beta) disulfate (2)	Lipid	Androgenic Steroids	37203	LC/MS Neg	100001994	4065	224.062					4457349	4641623	4744286	5505762	6840906	5.96523e+06	3943419	3979186	3163349	3985264	4306197	3566713	5260840	5.70824e+06	4850241	3625956	3561496	3.32306e+06	6479421	6205781	6188241	6412400	6273623	6582856
3219	androstenediol (3beta,17beta) monosulfate (1)	Lipid	Androgenic Steroids	37211	LC/MS Neg	100002028	4535	369.174	13847309	521-17-5		HMDB03818	1957173	2296775	1987297	3830934	5037891	3.52929e+06	2998499	3404255	2521032	3352358	4152771	2879389	2564527	3.63659e+06	2291368	3130176	3.90683e+06	2793198	4383450	5075071	4357704	9309388	9821131	9963705
3220	androstenediol (3beta,17beta) monosulfate (2)	Lipid	Androgenic Steroids	37210	LC/MS Neg	100002029	4500	369.174					577076	542216	577900	763343	891402	772947	496031	490909	417940	403176	423059	394620	263271	322161	275864	333199	351522	336716	574568	618011	635938	640481	618442	603483
3201	androsterone glucuronide	Lipid	Androgenic Steroids	61846	LC/MS Neg	100002761	4953	465.249	114833	1852-43-3	C11135	HMDB02829	394755	343332	388057	2626964	2834046	2350168	395768	362617	271243	480152	542558	375954	1207407	1170441	843201	574920	531231	377214	896521	710173	685626	741118	854242	779175
3211	androsterone sulfate	Lipid	Androgenic Steroids	31591	LC/MS Neg	100001073	5022	369.174	159663	2479-86-9		HMDB02759	25601840	25848904	27734840	34418808	41477748	37821540	18150324	19232652	16181247	12001206	13247916	11597915	15631717	17183644	15413977	9186942	9696210	8961372	10847513	10600048	10188254	28325272	28671720	28285348
259	anthranilate	Amino Acid	Tryptophan Metabolism	4970	LC/MS Pos Early	1258	2606	138.055	227	118-92-3	C00108	HMDB01123	655363	251507	751514	843979	235393	626959	973447	384281	1.29635e+06	1185740	312008	1492792	366429	213776	541415	570807	311445	1166824	719996	215425	1.412e+06	1448740	382784	340381
1205	arabinose	Carbohydrate	Pentose Metabolism	575	LC/MS Polar	828	1804.5	195.051	66308	28697-53-2	C00216	HMDB00646	457219		301295	427882	397984	624515	535303	208472	334415	541294			450030	740103	495065	692703	674878	260743	623171	210501	640837	383672	360493	481616
1213	arabitol/xylitol	Carbohydrate	Pentose Metabolism	48885	LC/MS Polar	100006430	1932.4	151.061					1282999	1211780	1381335	1599550	1827818	1641455	2327306	1894620	1585021	1782027	1609005	1242362	1.73029e+06	2163791	1587331	2163945	2.02596e+06	1688106	1417577	1335003	1613949	1645435	1466259	1658302
1219	arabonate/xylonate	Carbohydrate	Pentose Metabolism	48255	LC/MS Polar	100006115	2700	165.041					5272494	4747498	5264798	9486182	9332038	7016102	7942253	6336060	3.87316e+06	7.40863e+06	6911829	7897473	5383076	8.10608e+06	6875934	9366056	14466473	7801838	9289353	7.89737e+06	8265123	5852925	5367391	6456706
1442	arachidate (20:0)	Lipid	Long Chain Saturated Fatty Acid	1118	LC/MS Neg	893	6240	311.296	10467	506-30-9	C06425	HMDB02212	9780494	10421239	11584576	8556328	10002278	10817121	8469782	8689018	7406269	9982606	12589295	11959186	12586372	14052006	10506065	13033993	11952286	11388785	16827820	13322944	14034195	12470085	13120952	13511687
1498	arachidonate (20:4n6)	Lipid	Long Chain Polyunsaturated Fatty Acid (n3 and n6)	1110	LC/MS Neg	229	5535	303.233	444899	506-32-1	C00219	HMDB01043	56234172	28474102	60677812	37855088	23993166	55177296	27029652	15667293	24972332	49479880	31469266	43016632	45474136	34727028	58134604	60746380	53538392	96358296	115220480	50982576	132000512	91646232	74364944	75431760
1807	arachidonoylcarnitine (C20:4)	Lipid	Fatty Acid Metabolism (Acyl Carnitine, Polyunsaturated)	57518	LC/MS Pos Late	100015837	1353	448.342					254043	233787	292508	151468	156170	168422	146122	145106	169151	161809	147297	146776	202656	300275	251541	342506	302744	298178	260784	223982	441170	344493	218748	229596
1861	arachidonoylcholine	Lipid	Fatty Acid Metabolism (Acyl Choline)	53261	LC/MS Pos Late	100009332	1390	390.337					1600123	214170	1.87116e+06	3352681	88690	2320503	1597526	237994	1613492	2773756	295634	3.99839e+06	964384	64967	4093810	1576482	400432	7108315	2342066		9626446	8267354	1.94758e+06	1822440
1783	arachidoylcarnitine (C20)*	Lipid	Fatty Acid Metabolism (Acyl Carnitine, Long Chain Saturated)	57513	LC/MS Pos Late	100015833	1512	456.405				HMDB06460	261843	229202	338318		154579			261581	229896	127176	132339	111449		419588	319804	482434	438501	449420	303186	276188	299033		277146	283363
474	argininate*	Amino Acid	Urea cycle; Arginine and Proline Metabolism	57461	LC/MS Pos Early	100002769	2150	176.103	160437	157-07-3		HMDB03148	1825503	2005393	1907148	5563693	6488478	5397554	2708005	2300775	2109183	2262971	2491146	2120886	1249738	1195217	955162	3323184	2942126	2929178	1107170	975449	1060958	5255286	4871801	4984571
436	arginine	Amino Acid	Urea cycle; Arginine and Proline Metabolism	1638	LC/MS Pos Early	231	2825	175.119	232	1119-34-2	C00062	HMDB00517	546841472	464995200	604342272	641542720	579361600	648102784	860148608	706433280	796268928	584578240	547529728	683944256	584044288	625194688	731082240	745600128	714532416	786127552	628379008	580555328	655719040	769190336	680692864	696964736
437	argininosuccinate	Amino Acid	Urea cycle; Arginine and Proline Metabolism	15497	LC/MS Pos Early	232	2745	291.13	16950	156637-58-0	C03406	HMDB00052			36345	80126	166626	95063	214409	204726	140776	69613	179067		227394	272637	129201	147116	102844	117495	53367			58644	195137	209918
4186	ascorbic acid 2-sulfate	Cofactors and Vitamins	Ascorbate and Aldarate Metabolism	63590	LC/MS Polar	100009329	3042	254.982	86484				4937181	4071395	4933446	9048749	8.21586e+06	7564312	6181252	5689191	4705175	9109019	6.76774e+06	6590856	6.74806e+06	8945377	7859501	8408680	9143798	5720358	7122421	6606674	6128296	6478716	4661046	6154824
4187	ascorbic acid 3-sulfate*	Cofactors and Vitamins	Ascorbate and Aldarate Metabolism	63687	LC/MS Polar	100020409	2025	254.982	11425365				1230103	1221893	1272617	3770124	4033293	3716440	2644033	2251819	1.63876e+06	2636003	2455241	2045647	2951710	3992777	2619231	2421106	2869506	1984929	2651519	2589004	2589618	3126527	2364369	3008622
39	asparagine	Amino Acid	Alanine and Aspartate Metabolism	512	LC/MS Pos Early	917	1225	133.061	6267	70-47-3	C00152	HMDB00168	117776456	97015144	141141248	149783792	132356416	156290096	166976192	129281520	153571440	137625504	116598496	147641280	120251208	119899240	140808304	146447616	129854256	140329616	159614320	131285280	161644016	146346432	138273264	138214720
35	aspartate	Amino Acid	Alanine and Aspartate Metabolism	443	LC/MS Pos Early	234	1165	134.045	5960	56-84-8	C00049	HMDB00191	7227264	7651401	8433949	4345109	6365790	5021985	6028258	6118388	4847886	6207316	8075402	6804535	3.18195e+06	6.80822e+06	4311369	7574197	8814690	4843839	3361758	5169034	3811276	4000366	5140557	5053958
1602	azelate (C9-DC)	Lipid	Fatty Acid, Dicarboxylate	18362	LC/MS Neg	2029	1276	187.098	2266	123-99-9	C08261	HMDB00784	214253	120308	214361	578551	636867	871500	621616	584929	581478	1081696	1009345	1286892	413550	301496	221815	522153	292356	265317	385705	185791	320827	340846	418322	434534
2970	behenoyl dihydrosphingomyelin (d18:0/22:0)*	Lipid	Dihydrosphingomyelins	57331	LC/MS Pos Late	100009026	3150	789.684				HMDB12091	9593733	10772439	11241027	7426426	9260572	8111044	7814147	8751411	7584224	8577497	9953723	8880889	6174280	7453859	6125079	13223341	13983955	13041557	8535905	8407615	8552104	10097435	9526440	9737527
2976	behenoyl sphingomyelin (d18:1/22:0)*	Lipid	Sphingomyelins	48492	LC/MS Pos Late	100006294	3083	787.669				HMDB12103	362836512	367978688	400282368	375795136	481143360	423588544	337316416	357645696	285241472	403104000	470986112	397420096	517604480	631050688	508829408	550640960	567088704	551061312	461634624	465752832	517963712	454915680	454346560	442768704
1784	behenoylcarnitine (C22)*	Lipid	Fatty Acid Metabolism (Acyl Carnitine, Long Chain Saturated)	57514	LC/MS Pos Late	100015832	1561	484.436					141188	143911	221947	98431	145871	172585	137703	141699	103784	68846	96474	70608	181450	182474	154019	153078	186168	190908	108436		90596	131501	124934
4308	benzoate	Xenobiotics	Benzoate Metabolism	15778	LC/MS Neg	100000008	1750	121.029	243	65-85-0	C00180	HMDB01870	1583623	1171832	1252572	828433	1500842	967688	1141449	2166476	1126153	1332782	1927114	1250099	1070502	1.45408e+06	1026388	1189902	1654382	1260171	1195448	1730153	1.30592e+06	1258535	1913412	1611773
5775	benzoylcarnitine*	Xenobiotics	Chemical	43265	LC/MS Pos Early	100004555	3041	266.139		105450-08-6					70272	62280	128587			102664		187787	132697					135955	140134	129790	200368	115170	140478
4085	beta-alanine	Nucleotide	Pyrimidine Metabolism, Uracil containing	55	LC/MS Pos Early	244	1905	90.055	239	56-41-7;107-95-9	C00099	HMDB00056	3.75388e+06	4652254	5541000	6.05437e+06	7176708	6.6845e+06	5450956	8.37125e+06	5899499	8990376	14533866	12768428	6801191	6994176	4568871	4497201	5664011	4861259	5027413	9398100	6218988	9514160	5705129	5424875
54	beta-citrylglutamate	Amino Acid	Glutamate Metabolism	54923	LC/MS Neg	100003271	530	320.062	72715786	73590-26-8	C20775		65870	112272	84670	67574	143454	79877	86996	101196	67487	108617	142672	62041	70840	110894	55643	113138	158480	104892	65737	75687	49352	42161	58244	67882
4271	beta-cryptoxanthin	Cofactors and Vitamins	Vitamin A Metabolism	57591	LC/MS Pos Late	100001977	2560	552.433	6384256	472-70-8		HMDB33844	1137517	1348073	1109007	1959988	2.65034e+06	2.92809e+06	1.78177e+06	1459394	1423739	4551167	4976108	3796418	7747354	8859080	5582494	14254448	10862196	14407248	10831871	11571809	14872942	7106349	6200498	6124004
327	beta-hydroxyisovalerate	Amino Acid	Leucine, Isoleucine and Valine Metabolism	12129	LC/MS Polar	1442	1149.8	117.056	69362	625-08-1		HMDB00754	5778096	4812116	7359407	6.32389e+06	5669778	5197846	6975447	5550557	4797803	6.17657e+06	5055591	4596434	4371111	4953307	4162356	6941902	6585328	5693424	6.93044e+06	5815105	6743491	6032671	4985886	5235846
328	beta-hydroxyisovaleroylcarnitine	Amino Acid	Leucine, Isoleucine and Valine Metabolism	35433	LC/MS Pos Early	100001594	2584	262.165		99159-87-2			1196297	1176804	1134763	1089613	1.25482e+06	891871	1.64845e+06	1249706	1025060	1433319	1.2011e+06	1071311	690973	974371	846656	1.55769e+06	1499486	1211797	1508522	1348388	1180950	792383	818134	791344
6	betaine	Amino Acid	Glycine, Serine and Threonine Metabolism	3141	LC/MS Pos Early	799	1064	118.086	247	107-43-7	C00719	HMDB00043	638964864	581561856	715390656	524848192	508710400	521381920	532713376	526349472	527439488	550006144	530173440	519878272	720336576	834594240	756019840	743762112	833351360	744734464	639146368	596680576	660039232	746374848	719374336	702069312
4590	betonicine	Xenobiotics	Food Component/Plant	38100	LC/MS Pos Early	100002153	1012	160.097	164642	515-25-3	C08269	HMDB29412													2.09075e+06	2823285	2574185	2.79111e+06	1.97674e+06	1216830	702105	539927	492177	672768	131560	687889
4245	bilirubin (E,E)*	Cofactors and Vitamins	Hemoglobin and Porphyrin Metabolism	32586	LC/MS Neg	100001950	4294	583.256	5315454				1991680	1357093	1497651	809678	792755	1035127	1544200	1807348	1467026	542184	606985	671274	2516810	2998153	3201004	4376785	3699637	3536030	4276305	3415461	4656790	2061258	1739869	1911277
4246	bilirubin (E,Z or Z,E)*	Cofactors and Vitamins	Hemoglobin and Porphyrin Metabolism	47886	LC/MS Pos Late	100001951	1265	585.271	5799469			HMDB00488	307918	346749	326733	248267	301746	247999	339833	331197	257234	120251	227646	125571	478178	514958	553472	709774	794104	757517	546960	558046	613717	442512	415195	388668
4244	bilirubin	Cofactors and Vitamins	Hemoglobin and Porphyrin Metabolism	43807	LC/MS Neg	1090	4796	583.256	5280352	635-65-4	C00486	HMDB00054	829622	914918	789619	614474	704746	757378	822733	1265490	966850	343343	456816	215742	1509127	1738499	1943687	2685757	3571628	2.72237e+06	1718370	2577384	2251407	1315339	1146710	1106085
4247	biliverdin	Cofactors and Vitamins	Hemoglobin and Porphyrin Metabolism	2137	LC/MS Pos Late	250	1016	583.255	5353439	55482-27-4;55482-27-4	C00500	HMDB01008	1380310	928539	1140344	597492	731001	629530	1668042	913976	928417	533705	374898	876092	1518470	3236394	1721831	2240975	1442010	1938460	2499819	1271895	2244373	977400	792093	769129
1616	branched chain 14:0 dicarboxylic acid	Lipid	Fatty Acid, Dicarboxylate	63191	LC/MS Neg	100021374	3849	257.176					637917	713154	725669	966556	1269526	1082623	929059	1020949	814096	1782087	2.02547e+06	1614269	590488	748383	675319	491165	885655	601114	1.99387e+06	2183354	2113949	1350125	1435026	1420946
5951	branched-chain, straight-chain, or cyclopropyl 10:1 fatty acid (1)*	Partially Characterized Molecules	Partially Characterized Molecules	63615	LC/MS Neg	100021666	4805	169.123					2.86229e+06	1705303	3.27741e+06	238780	276343	399432	1490150	1026002	646742	1982340	1922490	2992153	1038553	1218152	1250710	487748	815774	802096	1.59489e+06	1228925	1676100	2292815	2199819	2300293
5952	branched-chain, straight-chain, or cyclopropyl 10:1 fatty acid (2)*	Partially Characterized Molecules	Partially Characterized Molecules	63616	LC/MS Neg	100021667	4853	169.123					581006	186673	245006	159765	207335	233394	74687	157849	148168	300467	277868	335373	238150	223422	285710	369970	407554	434698	295779	279706	386601	364315	407874	393477
5953	branched-chain, straight-chain, or cyclopropyl 10:1 fatty acid (3)*	Partially Characterized Molecules	Partially Characterized Molecules	63617	LC/MS Neg	100021668	4931	169.123					31121		25217	139410	112920	52350	178170	54387.6	119715	25271	239618	78665	230283	202405	170698	68839	50482	173737	231096	14093	96918	29378	17759	173487
5954	branched-chain, straight-chain, or cyclopropyl 12:1 fatty acid*	Partially Characterized Molecules	Partially Characterized Molecules	63683	LC/MS Neg	100021709	5261	197.155					1784989	939165	1279746	470978	486571	555195	616158	530539	388272	1170956	1965981	2397414	1.65444e+06	1425016	1054317	1527263	1797567	1619122	2570138	1304929	3697824	2416406	1273721	1323068
1414	butyrate/isobutyrate (4:0)	Lipid	Short Chain Fatty Acid	40605	LC/MS Neg	1143	1062	87.0452	264	109-92-6	C00246	HMDB00039	4404463	3992143	4.98415e+06	2443745	8690082	3307548	4846121	8888982	3711944	6294884	7.27767e+06	3204838	3439633	8575550	3485944	5025368	8468575	4163112	4706370	9024194	4090042	4489556	8383348	9153240
1691	butyrylcarnitine (C4)	Lipid	Fatty Acid Metabolism (also BCAA Metabolism)	32412	LC/MS Pos Early	100001054	2860	232.154	439829	25576-40-3	C02862	HMDB02013	4634276	4804039	4856686	3877872	5984933	4.07846e+06	5505252	6.98385e+06	5091722	5579016	7794792	5513765	3.46989e+06	6585018	4816837	5609297	7998623	7489050	2358468	3096963	2906835	14225875	14636587	15530332
1692	butyrylglycine (C4)	Lipid	Fatty Acid Metabolism (also BCAA Metabolism)	31850	LC/MS Neg	100001151	1470	144.067	88412	20208-73-5		HMDB00808	73145	88027	84172	64684	128333	64070.7	147239	153829	121537	69935	91418	131260	55006	90909.8	71138	63212	118300	65762	96250	86488	71220	137614	183543	177686
247	C-glycosyltryptophan	Amino Acid	Tryptophan Metabolism	48782	LC/MS Neg	100006379	1777	365.135	10981970	180509-18-6			119132	114013	128366	131506	157900	135699	165727	145191	138800	169764	160969	131048	149786	165920	147532	159591	167661	138508	172672	157515	172216	149613	131250	118794
4980	caffeic acid sulfate	Xenobiotics	Food Component/Plant	53254	LC/MS Neg	100009337	870	258.992				HMDB41708	161595	213225	206740	212004	440673	404783	522933	716884	658170	1249881	1471197	689324	78227	99498	41050	458528	605859	612498	138357	244592	369121	222556	291250	233362
4409	caffeine	Xenobiotics	Xanthine Metabolism	569	LC/MS Pos Early	849	2106	195.088	2519	58-08-2	C07481	HMDB01847	2107280	1.86617e+06	2640863	74617240	92392544	90767808	7.37651e+06	7.75881e+06	7.58117e+06	4438205	4796558	5447358	6180180	7.72646e+06	7361593	5209314	6978023	5603175	19317712	21906094	23541172	7001663	8260813	8040868
1420	caprate (10:0)	Lipid	Medium Chain Fatty Acid	1642	LC/MS Neg	888	5090.7	171.139	2969	334-48-5	C01571	HMDB00511	48175004	24144870	44020636	3324505	4017260	5868623	18389350	15681361	8598402	33058644	33208840	50050664	17566632	22479080	20155254	9416739	14146832	14299462	19544468	17675600	25890048	43879672	40246568	40356160
1416	caproate (6:0)	Lipid	Medium Chain Fatty Acid	32489	LC/MS Neg	926	2713.7	115.076	8892	142-62-1	C01585	HMDB00535	1559425	1421500	1968077	853503	1041701	886406	1104015	1141784	1063692	1414473	1496891	1.50105e+06	794733	1149331	1359618	1081325	1.51858e+06	1261525	1083879	1366121	1.5075e+06	1286575	1717168	1.43152e+06
1418	caprylate (8:0)	Lipid	Medium Chain Fatty Acid	32492	LC/MS Neg	932	4362	143.108	379	124-07-2	C06423	HMDB00482	12286168	7322383	17352008	1701681	1925138	2017620	7896545	5109333	5019048	9396056	8558148	12577152	5971087	5491985	6582505	3131324	3.57336e+06	4821990	3200230	3.73341e+06	6.25598e+06	18217502	13951711	13365025
56	carboxyethyl-GABA	Amino Acid	Glutamate Metabolism	40007	LC/MS Pos Early	100003260	2085	176.092	2572	4386-03-02		HMDB02201	225388	245698	209640	192612	210170	174061	236278	261319	193419	190664	253505	203313	238532	340029	204255	283963	400249	292931	236716	248283	243534	302235	296474	300169
1842	carnitine	Lipid	Carnitine Metabolism	15500	LC/MS Pos Early	100000007	1978	162.113	10917	461-05-2	C00318	HMDB00062	853552640	799689856	937514112	874753920	833715520	922686016	894862464	778801792	807756224	872470400	827602944	868630976	611333440	714129280	738815744	805089920	787689600	839700672	820897024	716826624	902487488	960324864	866183488	901842432
4267	carotene diol (1)	Cofactors and Vitamins	Vitamin A Metabolism	57635	LC/MS Pos Late	100015966	1720	568.428					5890819	6117519	6.62891e+06	9702927	12182663	11439958	2850057	2882365	3117262	14525507	17938160	14431447	10284234	12110669	9742954	26520744	28341752	26051208	9772416	10927813	10809616	20732448	20002742	21185384
4268	carotene diol (2)	Cofactors and Vitamins	Vitamin A Metabolism	57636	LC/MS Pos Late	100015967	1904	568.428					1.78146e+06	1645875	1729461	2535014	3490326	2948963	711299	1104335	848765	4196446	5080836	3863168	2763071	3080312	2732822	7054032	7.05561e+06	6548780	3.12407e+06	2989279	3754077	5752236	5817015	5394587
4269	carotene diol (3)	Cofactors and Vitamins	Vitamin A Metabolism	57637	LC/MS Pos Late	100015968	1948	568.428					371096	397003	603074	1649880	1814680	1922973	258105	472975	292584	1362156	1205444	1141016	2.05503e+06	2379836	2239776	3.79452e+06	4206973	3531296	948952	1334084	1368589	2441487	2553709	2999817
4328	catechol sulfate	Xenobiotics	Benzoate Metabolism	35320	LC/MS Neg	100001605	1906	188.986	3083879	4918-96-1		HMDB59724	18271926	17032738	14270000	36520512	42219000	36338928	23055064	22342376	17436472	39531940	46495100	37753876	17646840	22888124	22742068	21944148	26845264	27866682	21744220	25156400	30668332	53798544	62772468	63617644
2922	ceramide (d16:1/24:1, d18:1/22:1)*	Lipid	Ceramides	57437	LC/MS Pos Late	100015727	3850	620.598					3663689	3723327	4058684	2578201	3590723	2440035	2003397	1750891	1515135	2119100	2633817	2439383	392874	442642	1504794	5242367	5517309	4418203	3884690	4007356	3474758	1.99997e+06	1746092	2163072
2918	ceramide (d18:1/14:0, d16:1/16:0)*	Lipid	Ceramides	57432	LC/MS Pos Late	100015735	2477	510.488					1629786	1755774	1620074	1127931	1522852	1155071	1121182	1190391	910681	1023745	1358707	1124795	936513	1148376	761560	2.70593e+06	2514857	1895820	1732232	1891704	1611516	991103	1125463	1007087
2919	ceramide (d18:1/17:0, d17:1/18:0)*	Lipid	Ceramides	57434	LC/MS Pos Late	100015737	3055	552.535					312514	356534	329187		153987	167780	176050	177391	106059	326186	556403	420756		95620		481591	483806	373954	281127	228166	222757
1786	cerotoylcarnitine (C26)*	Lipid	Fatty Acid Metabolism (Acyl Carnitine, Long Chain Saturated)	57516	LC/MS Pos Late	100015835	1649	540.499				HMDB06347	1512723	1784224	1.87519e+06	1316686	1804932	1475626	1800792	2021646	1678417	1538766	1876968	1555640	2767765	3515231	2562144	2762572	2955353	2715720	1577820	1715839	1778414	2.03045e+06	2101760	2.08502e+06
3308	chenodeoxycholate	Lipid	Primary Bile Acid Metabolism	1563	LC/MS Neg	1123	5264	391.285	10133	474-24-9;474-25-9	C02528	HMDB00518	1791003	1675464	2532646	1795448	2009837	3260724	7287670	2716289	4189423	443627	563528	491622	6443932	2.62259e+06	2411541	2338417	2484090	2299226	2.46125e+06	2567589	2757263	1962330	1851333	1871090
2095	chiro-inositol	Lipid	Inositol Metabolism	37112	LC/MS Polar	100001859	3191.2	225.062		643-12-9	C19891	HMDB34220																6329570	4769066	2166120	1279015	1402126	1705082			388188
3305	cholate	Lipid	Primary Bile Acid Metabolism	22842	LC/MS Neg	136	5165	407.28	221493	81-25-4	C00695	HMDB00619	558856	420833	949342	701040	1260418	3.96742e+06	5401991	1.95606e+06	3.91725e+06	285167	342990	459975	2331283	773501	945903	303666	79056	144410	443331	326635	279275	305572	76055	72642
3063	cholesterol	Lipid	Sterol	63	LC/MS Pos Late	266	2707	369.352	11025495	57-88-5	C00187	HMDB00067	98348424	93876752	100490872	93196912	130811080	83570464	78975552	86325984	67253944	85754360	96677576	80096440	110725504	145234080	118569384	144698256	139411680	156186240	124386272	120383880	144930992	109364976	101820480	108914096
2123	choline	Lipid	Phospholipid Metabolism	15506	LC/MS Pos Early	1256	1961	104.107	305	67-48-1	C00114	HMDB00097	126928264	108739712	129336432	125924864	109507568	124409648	102804064	94060248	94799120	105142992	87670784	92167696	130072424	163909312	165070768	162119232	148095488	153380528	162708496	115015360	155883856	141616912	114337360	114519736
2124	phosphocholine	Lipid	Phospholipid Metabolism	34396	LC/MS Pos Early	267	700	184.073	1014	72556-74-2	C00588	HMDB01565	3372415	3937754	3509962	2489560	4641823	3580410	3156571	3861428	3381989	2522893	3230746	2576771	1874015	3.83354e+06	2774234	2658206	3719707	2650053	4666913	4516428	3820170	3649155	4276307	3.75089e+06
4643	cinnamoylglycine	Xenobiotics	Food Component/Plant	38637	LC/MS Neg	100002253	3127	204.067	709625	16534-24-0		HMDB11621	346361	577844	318700	1845345	4.11881e+06	1555089	685313	1192973	468318	885799	1849348	1631590	45015	71412	42478	344153	639087	282677	3179371	2841862	2478854	1062808	1118313	1136578
1833	cis-3,4-methyleneheptanoylcarnitine	Lipid	Fatty Acid Metabolism (Acyl Carnitine, Hydroxy)	64389	LC/MS Pos Late	100021728	845	286.201					20188560	21934364	23709872	8661503	13156399	10169072	3835572	4437300	3.5284e+06	2813754	4224554	3057001	13660874	21393400	14294075	14484737	16245475	14533548	11674048	16357136	11501631	18972196	20594138	20549736
1733	cis-3,4-methyleneheptanoylglycine	Lipid	Fatty Acid Metabolism (Acyl Glycine)	64386	LC/MS Neg	100021992	3731	198.114					191267	287753	210601	105777	157895	98004	63992	68290	48189	46574	66322	37747	169023	179069	145998	217857	262275	208007	201878	232096	201605	183759	222994	225086
1421	cis-4-decenoate (10:1n6)*	Lipid	Medium Chain Fatty Acid	62873	LC/MS Neg	100002796	4890	169.123	5312351	505-90-8			479292		589114	498352	425220	533825	475189	375909	344115	442624	1263536	704872	997324	1.18996e+06	737599	865985	1115732	1.03236e+06	1.67645e+06	1026917	1627920	1698070	1146503	1162683
1793	cis-4-decenoylcarnitine (C10:1)	Lipid	Fatty Acid Metabolism (Acyl Carnitine, Monounsaturated)	38178	LC/MS Pos Late	100002259	1057	314.233		98930-66-6			2721220	2163431	2766259	1034025	1662291	1831479	1365204	1583356	1665804	1307603	2570361	1987018	3961021	5535578	4.05106e+06	2797306	3.90413e+06	4621487	4483536	3773322	6700728	5336942	3667051	3671248
1390	citraconate/glutaconate	Energy	TCA Cycle	47076	LC/MS Polar	100006438	2600	129.019					461075	744923	592367	3320072	1.89598e+06	1372001	817934	1078191	583310	1.01658e+06	1644963	1025295	350620	936345	255945	545594	1.00484e+06	389015	618804	1870325	700075	863095	1115704	1332419
1369	citrate	Energy	TCA Cycle	1564	LC/MS Neg	1124	582	191.02	311	77-92-9	C00158	HMDB00094	190700544	187850640	194891200	242191152	209279392	138009776	304616032	207297440	174516128	262600976	229089856	159596336	349535200	234626352	210691152	228963408	227711520	158768800	352911968	196289344	189961632	204470528	180324496	170163056
445	citrulline	Amino Acid	Urea cycle; Arginine and Proline Metabolism	2132	LC/MS Pos Early	391	1520	176.103	9750	372-75-8	C00327	HMDB00904	87664440	82744960	83160832	160246144	181362096	177488432	190580656	172622512	176675600	99332720	88894896	86168960	109518128	124187328	111078080	157110368	142709648	163960912	136227488	130519064	187651424	175790000	159039200	158588608
3166	corticosterone	Lipid	Corticosteroids	5983	LC/MS Neg	272	5040	345.207	5753	50-22-6	C02140	HMDB01547		101540		73235	194929	25132	76396	108673	27042	150790	355838	21381	214565	398691		175413	454672	41997	686478	639176	46326	16482	32264	37456
3173	cortisol	Lipid	Corticosteroids	1712	LC/MS Polar	356	832	407.207	5754	50-23-7	C00735	HMDB00063	1219798	1817032	1262695	2142137	2394722	1725290	2061684	1.99394e+06	1421006	2893509	3569542	1693580	2747648	2809291	1227785	2484669	2984140	1536724	3822789	3370371	1613068	1293587	1721286	1819537
3177	cortisone	Lipid	Corticosteroids	1769	LC/MS Neg	273	4575	359.186	222786	53-06-5	C00762	HMDB02802	162320	196018	153499	124552	205032	151672	161976	195621	127776	150942	237964	138261	120153	216934	139205	183859	286526	133914	236899	279596	235503	184128	234979	227321
3183	cortolone glucuronide (1)	Lipid	Corticosteroids	57699	LC/MS Neg	100015971	4600	541.265					96745	89957	104165	130156	157112	128810	51416	53817	37097	90701	96318	78661	66963	74668	67488	136023	118149	125113	109625	85321	98595	64519	57504	66640
4429	cotinine	Xenobiotics	Tobacco Metabolite	553	LC/MS Pos Early	848	2213	177.102	854019	486-56-6		HMDB01046							22925274	20674650	19609580
4431	cotinine N-oxide	Xenobiotics	Tobacco Metabolite	38662	LC/MS Pos Early	100002719	1377	193.097	9815514	36508-80-2		HMDB01411							133410	165832	140052
480	creatine	Amino Acid	Creatine Metabolism	27718	LC/MS Pos Early	1221	1947	132.077	586	57-00-1	C00300	HMDB00064	385735520	513651872	409035712	428165408	604384512	431710144	294614528	357824096	257368832	1050640448	1151687936	906089344	128042688	234402208	167428816	431910816	422106048	289420928	263482656	354964320	228849088	256345536	362124480	374900768
481	creatinine	Amino Acid	Creatine Metabolism	513	LC/MS Pos Early	275	2055	114.066	588	60-27-5	C00791	HMDB00562	518729408	488617120	546958784	616405440	630570432	584829632	667741696	583653248	545552128	588254848	577595200	534211040	566317760	636624768	551882304	583492160	620337536	553113152	725950784	651244288	694421632	591246144	549384064	550261440
529	cys-gly, oxidized	Amino Acid	Glutathione Metabolism	18368	LC/MS Pos Early	1224	2947	355.074	333293	7729-20-6			1006138	1042551	1278628	1325652	1867676	1.35331e+06	2304407	1231891	1255644	1242694	1062717	1175718	2136193	1515583	1036125	1155483	1187829	1266940	2321527	1.02866e+06	1166527	1.80185e+06	1188197	1164634
408	cystathionine	Amino Acid	Methionine, Cysteine, SAM and Taurine Metabolism	15705	LC/MS Pos Early	310	2270	223.075	439258	535-34-2	C02291	HMDB00099	601431	618113	953348	2578262	2.96669e+06	2343311	946615	421653	508822	179208	330890		1171838	1076427	520947	3.35653e+06	2775617	2405660	178652	252792	248975	381017
410	cysteine	Amino Acid	Methionine, Cysteine, SAM and Taurine Metabolism	1868	LC/MS Pos Early	800	1475	122.027	5862	52-90-4;56-89-3	C00097	HMDB00574	2989245	3999768	2884073	2359019	4599030	2231720	2234165	3454218	2.08118e+06	2821447	3668758	1.61902e+06	2930268	5043863	2783151	3.21285e+06	5227436	2344046	3285079	4967225	2110574	2084901	4224207	4015028
416	cysteine s-sulfate	Amino Acid	Methionine, Cysteine, SAM and Taurine Metabolism	22176	LC/MS Pos Early	100000808	565	201.984	115015	1637-71-4	C05824	HMDB00731	675447	374881	687472	565823	333128	542231	663593	401075	464230	980318	374104	483602	376044	335794	468023	557516	333934	428072	457280	250356	498416	552838	308238	347042
423	cysteine sulfinic acid	Amino Acid	Methionine, Cysteine, SAM and Taurine Metabolism	37443	LC/MS Pos Early	100002113	597	154.017	109	207121-48-0	C00606	HMDB00996	494317	238207	588133	408416	138084	457991	473325	236351	637400	375712	93543	542067	324113	147166	386586	372349	162401	585294	423146	130345	610736	454658	198551	167332
524	cysteine-glutathione disulfide	Amino Acid	Glutathione Metabolism	35159	LC/MS Pos Early	100001437	2465	427.095	4247235	13081-14-6		HMDB00656	1222633	1177688	1560414	514198	694836	439759	2040600	843482	891799	382814	340111	510342	3862731	5327255	1923803	654242	498640	681327	3.93529e+06	1726680	2629857	2843659	1971677	1629300
527	cysteinylglycine	Amino Acid	Glutathione Metabolism	35637	LC/MS Pos Early	278	2132	179.048	439498	19246-18-5	C01419	HMDB00078	165196	680537			952773	42420		762749	109465		1.0207e+06	57373	391541	817991		354640	1.04047e+06		486554	718848	64752	133980	779653	527658
528	cysteinylglycine disulfide*	Amino Acid	Glutathione Metabolism	62103	LC/MS Pos Early	100002466	2547	298.053		70555-24-7		HMDB00709	25650924	28785034	28995644	28705574	34944552	27717950	41556136	27169854	29702986	25009438	23054396	30056146	39324324	29447996	25403762	25930564	22786958	30754838	43677996	24512296	33676108	34642260	29608056	23223694
417	cystine	Amino Acid	Methionine, Cysteine, SAM and Taurine Metabolism	56	LC/MS Pos Early	279	2000	241.031	67678	56-89-3	C00491	HMDB00192	20956316	10989509	12303008	16617337	12213897	12216863	8319442	11087433	10676916	8342517	6.15228e+06	15332781	10355029	8.11185e+06	16002808	8848952	10474791	7.79702e+06	14845286	13012572	11187667	9108439	6735458	6263995
4096	cytidine	Nucleotide	Pyrimidine Metabolism, Cytidine containing	514	LC/MS Pos Early	827	2124	244.093	6175	65-46-3	C00475	HMDB00089	421771	453535	404678	114209	64707	95507	688343	572779	363106	67473	53810	85103		29336	89741	242143	118425	152764	93042		106779	324906	277954	248781
4097	cytosine	Nucleotide	Pyrimidine Metabolism, Cytidine containing	573	LC/MS Pos Early	881	2060	112.05	597	71-30-7	C00380	HMDB00630	259187	295414	314032	101122	57192	86314	128485	194427	124910	91302	46623		88102	115028	82625	198605	153345	156465		62250	67600	201179	241630	248536
1605	decadienedioic acid (C10:2-DC)	Lipid	Fatty Acid, Dicarboxylate	63685	LC/MS Neg	100021711	1328	197.082					85954	87449	104461	379387	628946	615744	246305	270491	223978	498644	723285	583385	113464	109766	61384	468598	475790	353259	157795	128934	70374	346944	307734	298596
1776	decanoylcarnitine (C10)	Lipid	Fatty Acid Metabolism (Acyl Carnitine, Medium Chain)	33941	LC/MS Pos Late	100001251	1130	316.248	10245190	1492-27-9		HMDB00651	5099607	2336695	3751397	648286	979016	1736658	1257892	1594726	1566921	1765318	3834315	3547351	4910504	5925679	5551384	3647203	3791781	4227419	4189404	3198451	7102812	8.2382e+06	3275364	3874208
3198	dehydroepiandrosterone sulfate (DHEA-S)	Lipid	Androgenic Steroids	32425	LC/MS Neg	100000792	4745	367.159	12594	651-48-9	C04555	HMDB01032	19900504	20009368	20955782	50216760	59862704	53390852	32708778	32462110	28828036	40002880	43608232	37804896	44788916	50544888	44443804	35464480	36424164	34344228	62710472	58322000	58488868	97218880	97351824	98084144
1841	deoxycarnitine	Lipid	Carnitine Metabolism	36747	LC/MS Pos Early	100001662	2052	146.118	134	6249-56-5	C01181	HMDB01161	24244872	24134336	27596024	34949040	38748816	35696836	39822532	36698384	33835588	32777950	35366820	31940486	27588668	37921592	29937018	25904758	32146952	26798600	39343880	37331888	41052640	31939532	31120816	30815246
3330	deoxycholate	Lipid	Secondary Bile Acid Metabolism	1114	LC/MS Neg	302	5294	391.285	222528	83-44-3	C04483	HMDB00626	6627765	5644172	8.215e+06	6192937	8066393	15442752	3.23227e+06	2830839	2.54527e+06	3022288	3.19693e+06	4868973	9326865	6640995	6211312	3.36081e+06	3269391	7036576	3159525	3061558	3575548	6397895	5843650	5857777
3333	deoxycholic acid 12-sulfate*	Lipid	Secondary Bile Acid Metabolism	63688	LC/MS Neg	100021712	4580	235.118					257858	259941	309842	239754	461751	521405		45355		194789	293065	375238	51702	79420	47679	50379	66669	79400	67356		62403	56079	66233	78311
3335	deoxycholic acid glucuronide	Lipid	Secondary Bile Acid Metabolism	63610	LC/MS Neg	100020550	4800	567.317					233440	260357	266821	136545	219334	264800				132279	163462	148836	211010	228669	218680	241858	305621	347700	164778	170320	203241	192570	218917	212240
2767	diacylglycerol (16:1/18:2 [2], 16:0/18:3 [1])*	Lipid	Diacylglycerol	54966	LC/MS Pos Late	100010940	2733	608.525					1731086	2124210	2540888	306789	554935	307415	533989	865704	295318	368397	688647	457285	1502066	2465790	1.89114e+06	2587432	3066980	2144181	960342	939573	726909	524985	887797	986979
1495	dihomolinoleate (20:2n6)	Lipid	Long Chain Polyunsaturated Fatty Acid (n3 and n6)	17805	LC/MS Neg	1231	5730	307.264	6439848	2091-39-6	C16525	HMDB05060	10270588	8678246	8463350	5.93789e+06	6093012	9488781	5370816	4569595	3520412	7831384	9400611	8784056	10405923	12738844	6414889	17313156	14312763	11694852	33850492	21085760	27601652	15858485	15352487	17010404
1497	dihomolinolenate (20:3n3 or 3n6)	Lipid	Long Chain Polyunsaturated Fatty Acid (n3 and n6)	35718	LC/MS Neg	100001739	5596	305.249	5280581	17046-59-2	C03242	HMDB02925	18951874	12142370	18451996	13642366	8914884	18700814	10827177	7.16834e+06	10856860	14875918	11705505	14567078	12506515	13199995	14098229	23456080	20502048	30371494	37903240	20336444	39210008	33134150	29195124	30345800
1856	dihomo-linolenoyl-choline	Lipid	Fatty Acid Metabolism (Acyl Choline)	53262	LC/MS Pos Late	100009335	1424	392.352					467751	51983	601924	1417385		1.00159e+06	685811	71998	659585	814607	40801	1268096	235977		1.00791e+06	627042	124054	2858843	738641		2.94121e+06	3.41076e+06	715984	643508
1808	dihomo-linolenoylcarnitine (C20:3n3 or 6)*	Lipid	Fatty Acid Metabolism (Acyl Carnitine, Polyunsaturated)	57521	LC/MS Pos Late	100015840	1392	450.358					177079	210918	236063	129508	150393	191417	151617	165105	120017	94398	140501	96451	150606	233236	99898	281499	302685	256571	224195	222029	248222	320508	232154	249949
1806	dihomo-linoleoylcarnitine (C20:2)*	Lipid	Fatty Acid Metabolism (Acyl Carnitine, Polyunsaturated)	57520	LC/MS Pos Late	100015839	1436	452.373					96718	109320	121927		93997	106506								124505		212173	182407	150276	205684	175595	242232	153771	120452	84227
4624	dihydrocaffeate sulfate (2)	Xenobiotics	Food Component/Plant	62524	LC/MS Polar	100020822	1328	261.007					799181	1034793	732771	1347278	2081259	835068	595064	1086096	502128	1096534	1892804	1542000	79670	197346	153081	104147	358851	191783	733011	750010	522345	160025	174139	322657
4668	dihydroferulate	Xenobiotics	Food Component/Plant	40481	LC/MS Neg	100003432	1928	195.066	14340	1135-23-5			119098	112488	80293		108394	206112	42435	53745	27248	48837	71170	93463		22763		47771	69258	35559		56066			42661	66339
4052	dihydroorotate	Nucleotide	Pyrimidine Metabolism, Orotate containing	601	LC/MS Polar	923	1910	157.025	648	155-54-4	C00337	HMDB03349	479611	568722	546889	348060	525834	392737	686199	802865	496949	491806	651963	431561	606400	781368	492835	319800	397508	307807	424073	528945	432470	401409	435526	468831
5743	dimethyl sulfone	Xenobiotics	Chemical	43424	LC/MS Pos Early	100004284	832	95.0161	6213	67-71-0	C11142	HMDB04983	401187	569105	728816	498923	688860	595810	573831	530309	210603	667314	527262	471085	928350	1054745	853757	418131	594255	380879	718464	679171	438496	304938	448760	291958
451	dimethylarginine (ADMA + SDMA)	Amino Acid	Urea cycle; Arginine and Proline Metabolism	36808	LC/MS Pos Early	100001810	2850	203.15	123831	102783-24-4	C03626	HMDB01539	28509176	25960836	31785220	35394108	34765680	33752424	37719572	30714958	30434132	31376396	30602766	31695176	30438466	37334472	38420228	37819268	37594612	35300604	38884632	34464736	40095196	47079256	40942488	39402916
5	dimethylglycine	Amino Acid	Glycine, Serine and Threonine Metabolism	5086	LC/MS Pos Early	806	1104	104.071	673	1118-68-9	C01026	HMDB00092	17552028	16120074	19322200	17843168	17585520	18140444	30787644	26666370	26685986	23271280	23500956	24395090	41053816	43415160	37429200	23930136	23424420	21074188	23957328	21595952	24453602	29570812	26619136	28149640
1580	dimethylmalonic acid	Lipid	Fatty Acid, Dicarboxylate	42978	LC/MS Polar	100004251	2702	131.035	11686	595-46-0		HMDB02001	183514		131255	150918	254553	79639		194736		146859			176163		137075				229896		144720			90364
1502	docosadienoate (22:2n6)	Lipid	Long Chain Polyunsaturated Fatty Acid (n3 and n6)	32415	LC/MS Neg	100001182	6034	335.296	5282807	7370-49-2	C16533	HMDB61714	442967	365776	371425	224146	269489	285843	204735	232106	119047	366400	418364	494906	382484	418646	227784	673257	584984	413483	1236049	827875	919633	556177	524159	540577
1627	docosadioate (C22-DC)	Lipid	Fatty Acid, Dicarboxylate	39837	LC/MS Neg	100002952	5291.8	369.301	244872	505-56-6	C19625		272862	282873	480577	395791	1130819	1373573	547745	982747	906416	452033	877014	448976	472844	636391	851921	277071	275819	323686	389951	231900	814582	985160	972462	1020591
1488	docosahexaenoate (DHA; 22:6n3)	Lipid	Long Chain Polyunsaturated Fatty Acid (n3 and n6)	44675	LC/MS Neg	100000665	5525	327.233	445580	6217-54-5	C06429	HMDB02183	37477960	25704978	40196448	17818416	15947783	27402488	8828071	5881000	6244474	17378124	15494013	16183500	35622936	35792120	30458580	29660728	28712388	36671692	81590160	42266608	77989696	53668260	43488620	44732872
1860	docosahexaenoylcholine	Lipid	Fatty Acid Metabolism (Acyl Choline)	53263	LC/MS Pos Late	100009333	1378	414.337					778716	103602	764801	1197311		792523	331993		269396	643094		842878	355070		1386447	508019	114622	2273308	1002625		3229432	2736112	735598	646661
1487	docosapentaenoate (DPA; 22:5n3)	Lipid	Long Chain Polyunsaturated Fatty Acid (n3 and n6)	32504	LC/MS Neg	100001181	5571	329.249	6441454	2234-74-4	C16513	HMDB06528	8732365	6299370	8.0295e+06	3.63388e+06	3728696	5414802	3488407	2600508	2384221	5022769	6137112	5202840	5487528	6317456	4.12962e+06	12163049	11819944	10870548	27204730	14943225	23759212	9873848	9187363	10068625
1501	docosapentaenoate (n6 DPA; 22:5n6)	Lipid	Long Chain Polyunsaturated Fatty Acid (n3 and n6)	37478	LC/MS Neg	100001580	5624.5	329.249	6441454	25182-74-5	C16513	HMDB01976	2262720	1776438	2268535	1486804	1.31011e+06	2110748	1181056	740886	907028	1562989	1504472	1622278	2538990	2679977	1.95277e+06	2329359	2.29125e+06	2601729	5683114	2830251	4858516	4719240	4139873	4184324
1489	docosatrienoate (22:3n3)	Lipid	Long Chain Polyunsaturated Fatty Acid (n3 and n6)	32417	LC/MS Neg	100001195	5823	333.28	5312556	59708-86-0	C16534	HMDB02823	166198		115071		130131	243955		68513.9		230581			212223	166350		431265	246278	219828	574530	311363	473943	422248	293007	460565
1499	docosatrienoate (22:3n6)*	Lipid	Long Chain Polyunsaturated Fatty Acid (n3 and n6)	57467	LC/MS Neg	100015762	5850	333.28					85372		82510.4		35345.9	119987		17502.9		30038.9			131251	31518.1		247493	80415.6	151367	358378	165171	244363	327482	195925	126614
1612	dodecadienoate (12:2)*	Lipid	Fatty Acid, Dicarboxylate	62276	LC/MS Neg	100020478	5146	195.139					622432	465183	584981	271639	286226	503448	164886	320214	188521	461989	1193721	905727	743062	932058	612418	837221	996890	922814	1168396	899012	1.63065e+06	1220140	843889	877051
1609	dodecanedioate (C12)	Lipid	Fatty Acid, Dicarboxylate	32388	LC/MS Neg	100001102	2990	229.144	12736	693-23-2	C02678	HMDB00623	1064629	915204	1607497	704012	923260	805825	1429231	1022914	1312221	1340756	1238440	1.69519e+06	1498807	1.36417e+06	1543446	954544	816633	731537	2568652	1.7533e+06	2161621	2322537	1446308	1523874
1611	dodecenedioate (C12:1-DC)*	Lipid	Fatty Acid, Dicarboxylate	61864	LC/MS Neg	100019972	2700	227.129					86606	54509	131059	132809	113979	185270	126139	168417	217462	258520	267385	259849	227503	207781	210721	133819	90515	162845	209567	138012	164673	209584	169739	151220
214	dopamine 3-O-sulfate	Amino Acid	Tyrosine Metabolism	48407	LC/MS Neg	100006361	1556.2	232.029	122136		C13690	HMDB06275	12479360	13739766	17679252	1494583	1746909	1591670	9666940	10690724	11570326	1615597	1488018	1390877	11043660	8160656	5.8241e+06	10323274	10584982	11085316	6199299	7083599	9850636	12868376	14655343	14084423
213	dopamine 4-sulfate	Amino Acid	Tyrosine Metabolism	48406	LC/MS Neg	100006360	1511	232.029	123932		C13691	HMDB04148	6260155	6239507	10414719	613198	630171	763268	4564206	4649194	5664574	724962	492331	576674	5529620	3154029	2685447	5294050	4809752	5191274	2805583	2715309	4214499	6281896	7501819	7859841
5745	ectoine	Xenobiotics	Chemical	35651	LC/MS Pos Early	100001635	1980	143.082	126041	96702-03-3	C06231					1009637	929495	1018784	768584	852680	748758	397491	554915	394569	1372131	1790542	1414276	199906	209159	157204	159819	157149	147299	159273	135497	158050
1625	eicosanedioate (C20-DC)	Lipid	Fatty Acid, Dicarboxylate	39831	LC/MS Neg	100002951	5200.9	341.27	75502	2424-92-2			792020	803246	907630	1670760	2079129	2010728	1492954	1722627	1442010	613717	739993	663825	1496131	1806610	1654606	1026055	1167806	1065469	1148631	1212039	1290181	1293716	1216321	1347723
1485	eicosapentaenoate (EPA; 20:5n3)	Lipid	Long Chain Polyunsaturated Fatty Acid (n3 and n6)	18467	LC/MS Neg	2050	5450	301.217	446284	10-2005-9;10417-94-4	C06428	HMDB01999	10866116	6387618	11195432	4510718	3652983	5953619	2942872	2075572	3078633	4058716	3547651	3.69756e+06	5996120	5872722	6.9522e+06	9884243	9264415	14238699	21671168	11530993	26123908	10485375	9788561	10170860
1862	eicosapentaenoylcholine	Lipid	Fatty Acid Metabolism (Acyl Choline)	53258	LC/MS Pos Late	100009336	1343	388.321					319925		346881	435984		230733	153716		178215	209706		292186	87241		468067	239089	56802	1281379	447942		1881321	810595	181307	165750
1626	eicosenedioate (C20:1-DC)*	Lipid	Fatty Acid, Dicarboxylate	62923	LC/MS Neg	100021105	5095	339.254					255861	281485	355508	563954	832256	654942	458435	495644	408333	197486	213382	200565	665528	766304	698302	477779	561448	483259	649318	651672	661835	745616	756693	824237
1468	eicosenoate (20:1n9 or 1n11)	Lipid	Long Chain Monounsaturated Fatty Acid	33587	LC/MS Neg	100001335	5950	309.28	5282768		C16526	HMDB02231	25513504	23107096	21102260	10551258	12219803	16414654	8892933	9061609	4895914	15551768	20951364	19006128	27163288	38275376	15097975	39901784	29418682	19681176	73628880	46718220	57421592	31582176	31369176	34293264
1800	eicosenoylcarnitine (C20:1)*	Lipid	Fatty Acid Metabolism (Acyl Carnitine, Monounsaturated)	57519	LC/MS Pos Late	100015838	1484	454.389					425728	418784	507436	145663	220668	278191	151957	121382	128756	151232	194365	172726	344888	415519	309970	441794	447479	408450	554920	457245	627500	392542	309014	291967
3203	epiandrosterone sulfate	Lipid	Androgenic Steroids	33973	LC/MS Neg	100001287	4855	369.174	9929317	22229-22-7			9880396	9965565	10321360	21078752	25754468	23324306	7737053	8157487	7262386	7746256	8433795	7576242	8146143	9029119	8.35446e+06	4525921	5003225	4655974	4611301	4334708	4451792	13290756	13844471	13800474
4682	ergothioneine	Xenobiotics	Food Component/Plant	37459	LC/MS Pos Early	100002154	850	230.096	3032311	58511-63-0	C05570	HMDB03045	2.01313e+06	2717308	2305659	4.09749e+06	5652166	4.07774e+06	1647466	1628729	855407	3387800	3.79741e+06	3302747	2043070	4365075	1.9669e+06	6.95692e+06	7.67072e+06	5673484	3889548	3911756	2911481	2978547	3528166	3508666
1472	erucate (22:1n9)	Lipid	Long Chain Monounsaturated Fatty Acid	1552	LC/MS Neg	1087	6355.6	337.311	5281116	112-86-7	C08316	HMDB02068	3.39326e+06	3573013	4121906	1482367	1.54591e+06	1630781	1151187	1255822	952309	2086786	2235462	2292509	3199928	2979927	1857414	4061097	2928137	3.00775e+06	7344923	4778086	7168598	3338897	3294295	3597999
4684	erythritol	Xenobiotics	Food Component/Plant	20699	LC/MS Polar	100000846	1491	167.056	222285	149-32-6	C00503	HMDB02994	425724	335488	417548	664222	699493	614585	571950	494401	433929	910471	704534	630795	704750	947391	698450	730954	846538	575537	503300	365539	549261	681068	549249	672866
1361	erythronate*	Carbohydrate	Aminosugar Metabolism	42420	LC/MS Polar	100001320	2186	135.03	2781043	88759-55-1		HMDB00613	72582488	58443492	74189368	91739176	89739840	82097992	93893848	80039776	63892900	99165224	76008560	71859952	94236824	106486920	88698040	113870048	107925208	84150064	90218520	76721904	88682688	101040048	87988744	97570888
3285	estrone 3-sulfate	Lipid	Estrogenic Steroids	18474	LC/MS Neg	1230	4417.3	349.111	3001028	438-67-5	C02538	HMDB01425	58480	58486	64254	31400	40625	35894				23618	31011	34705	56718	61334	44384	37202	45980	25314	53962	51975	30158	29812	34016	28908
4873	ethyl alpha-glucopyranoside	Xenobiotics	Food Component/Plant	63152	LC/MS Pos Early	100015965	1248	226.129	428040	34625-23-5			535243	643376	877038	6285341	8.35078e+06	6327734	378478	377075	528249	229557	266522	284540	477240	600036	596068	1769939	2259598	2091368	100757	76017	124954	450036	486319	463378
5000	ethyl beta-glucopyranoside	Xenobiotics	Food Component/Plant	64131	LC/MS Pos Early	100020377	1100	226.129	121667				1481635	1675832	1593585	1037143	1430415	943324	383359	446636	562081	1853207	1994921	1776661	914648	963529	934476	7908381	8247278	6749919	1271183	1069503	1419689	851181	873076	871726
365	ethylmalonate	Amino Acid	Leucine, Isoleucine and Valine Metabolism	15765	LC/MS Polar	2054	2785	131.035	11756	601-75-2		HMDB00622	6152449	5246050	7.15945e+06	5839798	5436033	5162817	7098232	6271209	5334234	9911618	9421087	8493292	6485644	8108505	7.08728e+06	7414348	8105898	7067946	5595036	4581001	5807368	20224304	16265970	18098476
3214	etiocholanolone glucuronide	Lipid	Androgenic Steroids	47112	LC/MS Neg	100005403	4915	465.249	270605	3602-09-03		HMDB04484	141197	132246	128520	1148487	1436613	1.26932e+06	111231	123101	67982	372073	471616	278209	563072	628126	418751	108981	121992	96037	281108	207812	205173	351128	360412	427735
4904	eugenol sulfate	Xenobiotics	Food Component/Plant	48715	LC/MS Neg	100006171	3782	243.033	180632	95480-60-7			3676244	4479955	5.95441e+06	1717561	3.08331e+06	3.64638e+06	1.5457e+06	2103289	2148494	426090	497477	447721	1406711	1707848	1876189	826512	1224727	1665316	253368	318868	500992	932340	1316973	1328148
4690	ferulic acid 4-sulfate	Xenobiotics	Food Component/Plant	47114	LC/MS Neg	100005389	1200	273.007	6305574	86321-29-1		HMDB29200	208328	414716	474181	392089	1255233	1271872	753115	983421	1139447	943233	1353738	535932	119904	222445	75436	1536890	1988136	2312410	112106	175665	327968	347339	413372	343735
1118	Fibrinopeptide B (1-13)	Peptide	Fibrinogen Cleavage Peptide	62813	LC/MS Neg	100020908	2482	696.772									19299			24906						86284			33409			39428
77	formiminoglutamate	Amino Acid	Histidine Metabolism	43493	LC/MS Pos Early	100002500	1880	175.071	439233	816-90-0	C00439	HMDB00854	2087203	2988317	2796049	607305	1047268	447974	1342763	1859042	1066944	1061775	1556957	804261	1443897	2077372	1038714	813322	1200285	486072	903851	1080605	535632	561742	689530	687483
1279	fructose	Carbohydrate	Fructose, Mannose and Galactose Metabolism	48195	LC/MS Polar	878	2065	225.062	5984	57-48-7	C00095	HMDB00660	5507553	4934302	10434530	6516039	4245405	7641753	7563529	5161535	12229662	16992772	9838312	22430552	20163116	10743814	19452844	23760828	9492668	18497114	14481450	5559878	16477908	13971472	12916183	15930593
114	fructosyllysine	Amino Acid	Lysine Metabolism	46227	LC/MS Pos Early	100005373	2784	309.166	123708	21291-40-7			12920928	13892375	17882940	14928505	24047644	16180878	24234248	24046716	10790100	6835704	10487369	11906653	18590334	44342608	20528376	25844932	12592862	7738644	15037199	24258440	13991998	12439019	17202192	17749084
1379	fumarate	Energy	TCA Cycle	1643	LC/MS Polar	330	3084	115.004	444972	100-17-8	C00122	HMDB00134	1411604	3220797	1745071	2617071	6672897	1602749	2516092	4379564	1351944	1959453	4234292	1131176	3383640	7300025	2312080	2182167	5.60013e+06	1.54711e+06	3784878	5671881	1682757	2059166	3581548	4238052
1295	galactitol (dulcitol)	Carbohydrate	Fructose, Mannose and Galactose Metabolism	1117	LC/MS Polar	1003	2360	181.072	11850	608-66-2	C01697	HMDB00107	343213	465451	474253	331427	398928	326466	555750	593415	469967	461969	463705	317133	560698	856314	653932	459436	564256	529711	496716	438365	609758	658250	744050	715102
1305	galactonate	Carbohydrate	Fructose, Mannose and Galactose Metabolism	27719	LC/MS Polar	100001026	3085	195.051	128869	299-28-5	C00880	HMDB00565	1706963	1.82742e+06	2795198	708744	601819	636058	3858278	5608349	3.52743e+06	5162179	2453555	3869346	3510962	6624820	5471626	2788375	5237097	3.18453e+06	3094684	5273950	5081088	3058246	2542615	1779338
4205	gamma-CEHC	Cofactors and Vitamins	Tocopherol Metabolism	44876	LC/MS Neg	100002094	3843	263.129	133098	178167-75-4		HMDB01931	238265	246205	239614	259871	364839	362010	327859	336995	258393	111477	147713	126071	502284	614063	633145	399129	436633	474784	311673	335192	414100	299013	280943	283938
600	gamma-glutamyl-2-aminobutyrate	Peptide	Gamma-glutamyl Amino Acid	37092	LC/MS Pos Early	100001502	2380	233.113		16869-42-4			563005	562142	726169	188506	216665	234036	428730	372900	425196	299715	291037	391231	325440	150521	185282	438261	258041	472661	298140	260173	378985	301265	319243	224796
590	gamma-glutamyl-alpha-lysine	Peptide	Gamma-glutamyl Amino Acid	55015	LC/MS Pos Early	100010901	2784	276.155	65254				1941707	1.69105e+06	2385644	1716927	1413870	1518603	2578373	2.08834e+06	2465270	1632282	1283493	1523908	2.04681e+06	2195906	2603635	1500016	1572315	1.67267e+06	1482827	1035108	1.64472e+06	1517394	1391927	1369581
591	gamma-glutamyl-epsilon-lysine	Peptide	Gamma-glutamyl Amino Acid	33934	LC/MS Pos Early	100001262	2725	276.155	7015685	17105-15-6		HMDB03869	1028559	1076396	1372113	1113971	1152853	1086046	1874061	1395167	1462346	964887	880188	670882	1291783	1507431	1302074	1154627	1067240	1125911	898493	769441	694511	618955	1233430	1072118
582	gamma-glutamylalanine	Peptide	Gamma-glutamyl Amino Acid	37063	LC/MS Pos Early	100001843	1986	219.098	440103	5875-41-2		HMDB29142	2522727	2241491	2417382	2646413	2309016	1789417	3.08993e+06	2192870	2022844	2120489	1361419	1510117	3565809	2758124	2338009	2228107	2064959	2125592	2677092	2001386	1514656	2422933	2717331	2741938
599	gamma-glutamylcitrulline*	Peptide	Gamma-glutamyl Amino Acid	62104	LC/MS Pos Early	100020241	1644	305.146					528818	351623	516384	822277	905619	748317	1262184	1000719	1095309	388106	190475	466174	851717	626397	522972	869458	696809	800077	818512	559998	993507	1283343	981695	917144
584	gamma-glutamylglutamate	Peptide	Gamma-glutamyl Amino Acid	36738	LC/MS Pos Early	331	1775	277.103	92865	1116-22-9	C05282	HMDB11737	455905	616499	518632	102882	227828	98227	149519	352391	270264	258367	151431	177700	263295	231694	206472	230084	336230	129744	203961	138061		99570	137416
585	gamma-glutamylglutamine	Peptide	Gamma-glutamyl Amino Acid	2730	LC/MS Pos Early	1140	1430	276.119	150914	10148-81-9	C05283	HMDB11738	27059344	19997606	29226050	24823362	20977588	20301344	33674856	22728912	24302176	19195560	10278700	20709654	27294368	21839802	20228508	26530476	22069872	23398640	32573964	18122012	25573944	36010896	24433910	24087744
586	gamma-glutamylglycine	Peptide	Gamma-glutamyl Amino Acid	33949	LC/MS Pos Early	100001294	1535	205.082	165527	1948-29-4		HMDB11667	2187170	1979424	2603337	3221770	3.0332e+06	3174929	3782345	3392288	3291997	2569700	1507808	1.95606e+06	2818638	3.10253e+06	3.2371e+06	2594386	2572398	2629284	3813120	3366772	4031652	2863951	2.94482e+06	2840121
587	gamma-glutamylhistidine	Peptide	Gamma-glutamyl Amino Acid	18245	LC/MS Pos Early	1235	2740	285.119	7017195	37460-15-4			635846	559798	688243	670433	709660	615127	958583	778908	776764	542482	497560	435265	577314	637149	631674	677670	620402	592617	759721	588898	715404	971451	871096	818490
588	gamma-glutamylisoleucine*	Peptide	Gamma-glutamyl Amino Acid	34456	LC/MS Pos Early	100001485	2940	261.144	14253342			HMDB11170	237093	296926	456178	185914	290383	421327	392468	489802	569162	197055	243200	417380	271862	543288	612412	219268	291150	459782	238089	217641	452353	173860	213448	143423
589	gamma-glutamylleucine	Peptide	Gamma-glutamyl Amino Acid	18369	LC/MS Pos Early	1268	2991	261.144	151023	2566-39-4		HMDB11171	1.40763e+06	1343701	1.90704e+06	1385406	1361088	1578336	2308935	1.84097e+06	2001318	1.43602e+06	1087751	1297800	2143038	2445371	2406755	1435267	1376123	1450787	1319521	1052509	1343381	1321559	1237839	1374003
592	gamma-glutamylmethionine	Peptide	Gamma-glutamyl Amino Acid	44872	LC/MS Neg	100001313	1268	277.086	7009567	17663-87-5		HMDB29155	118176	92834	173811	166389	134559	173567	271217	163919	224068	149432	82495	122296	255828	196973	242049	159982	133624	167044	135426	71006	138092	168421	143472	156918
593	gamma-glutamylphenylalanine	Peptide	Gamma-glutamyl Amino Acid	33422	LC/MS Neg	100000491	1825	293.114	111299	7432-24-8		HMDB00594	113124	99194	155223	159935	170581	163199	207847	170590	174835	158029	117456	113480	180935	206992	213873	152048	139353	138050	113751	95122	151946	160257	146619	149441
594	gamma-glutamylthreonine	Peptide	Gamma-glutamyl Amino Acid	33364	LC/MS Pos Early	100001314	1750	249.108	76078708	5652-48-2		HMDB29159	1884562	1721562	2122700	1529250	1525102	1355733	2202926	2106903	2240219	1272296	1370915	1511078	1808671	1886428	1937737	1300558	1340288	1176136	2261837	1949381	2775730	1548330	1295185	1340018
595	gamma-glutamyltryptophan	Peptide	Gamma-glutamyl Amino Acid	33947	LC/MS Neg	100001295	1960	332.125	3989307	66471-20-3		HMDB29160	28759	27664	36136	26803	35266		43558	30904	28060	31031	26021	31408	45996	43541	55950	35039	29891	28146	44715	31125	36837	32583	34865	29458
596	gamma-glutamyltyrosine	Peptide	Gamma-glutamyl Amino Acid	2734	LC/MS Neg	1102	1240	309.109	94340	7432-23-7		HMDB11741	125746	92525	171771	131603	149383	156867	228865	183553	195554	114286	104031	92006	203967	209255	174165	163432	161778	164859	101145	59600	116764	137380	125453	129142
597	gamma-glutamylvaline	Peptide	Gamma-glutamyl Amino Acid	43829	LC/MS Pos Early	100001126	2700	247.129	7015683	2746-34-1		HMDB11172	1529064	1531880	2.0056e+06	866022	1050640	1055018	2699986	2615639	2020789	1602553	1825445	1.71213e+06	2125459	2174337	1.77266e+06	1223308	1261870	1281511	1.6992e+06	1593752	1.93572e+06	713019	316383	301248
4219	gamma-tocopherol/beta-tocopherol	Cofactors and Vitamins	Tocopherol Metabolism	52473	LC/MS Pos Late	100008998	2384	416.364					32656178	34592596	37895680	15258231	19679378	15514051	10200406	12326944	10972490	11815237	13221047	12883054	18917300	22699968	21092042	46366692	56605120	47929004	18898658	19223296	20383514	27548208	28534776	28909572
209	gentisate	Amino Acid	Tyrosine Metabolism	18280	LC/MS Neg	100000447	1459.8	153.019	3469	490-79-9	C00628	HMDB00152	130410	177094	166425	121261	178468	118770	463552	508972	404724	747576	965301	521333	174067	185499	162111	187796	263872	212455	236552	312207	299235	473599	558547	564005
5956	GlcNAc sulfate conjugate of C21H34O2 steroid	Partially Characterized Molecules	Partially Characterized Molecules	63699	LC/MS Neg	100021726	4336.7	299.639					63880	54170	74806	73804	91694	95105	39694	39066	36006	73197	89808	63941	53589	74647	61368	56168	74837	57893	114195	97475	114712	100624	102293	95379
4595	gluconate	Xenobiotics	Food Component/Plant	587	LC/MS Polar	338	2922	195.051	10690	527-07-1	C00257	HMDB00625	4439825	3295758	4571054	5215975	6.26993e+06	4985959	5685908	6262608	4548186	7.66109e+06	5358976	6392938	6117781	8823372	6485286	6640174	9332553	5833157	6759414	6656693	5450296	6.37011e+06	6566929	8170356
1159	glucose	Carbohydrate	Glycolysis, Gluconeogenesis, and Pyruvate Metabolism	48152	LC/MS Polar	572	2342	225.062	5793	50-99-7	C00031	HMDB00122	821742464	782939328	925673792	814273024	870281408	962206272	790807936	672408512	690676288	912573504	804192192	851152896	964091328	1150059648	829584192	964474240	895045760	724802368	1136462592	1048516032	961289984	893386304	750385408	821002560
1337	glucuronate	Carbohydrate	Aminosugar Metabolism	15443	LC/MS Polar	100000257	3233.3	193.035	444791	207300-70-7	C00191	HMDB00127	9658175	8186432	11154917	11296397	10919943	11434806	8308332	6852950	6632390	11528236	10125797	11488846	8243576	8553813	8975594	10327808	10335547	10360284	10595005	8.29144e+06	11313348	12058211	9895114	10126088
5898	glucuronide of C10H18O2 (7)*	Partially Characterized Molecules	Partially Characterized Molecules	61887	LC/MS Neg	100020014	3790	345.156					88605	84572	105467	220780	362516	487543				35749	58110	71090			30936	580552	719046	760869	78994	72481	96222	69610	116452	100948
5899	glucuronide of C10H18O2 (8)*	Partially Characterized Molecules	Partially Characterized Molecules	61888	LC/MS Neg	100020015	3865	345.156					50467	32258	59915	76352	124080	142609					50199	62351				137578	178345	200995	37317		52948	57106	56733	53538
5910	glucuronide of C12H22O4 (1)*	Partially Characterized Molecules	Partially Characterized Molecules	61874	LC/MS Neg	100019984	2590	405.177					50898	79873	121462	74845	63511	85987	119077	143529	191962	74151	50509	72894	59114	70337	86637	106342	109635	170078	25724		47283	46275	33938	41287
5915	glucuronide of C14H26O4 (1)*	Partially Characterized Molecules	Partially Characterized Molecules	61876	LC/MS Neg	100019986	3200	433.208					28249	35310	67667	57860		55469	65040	88101	110902		44299			45883	62868	48049	81440	84403
4793	glucuronide of piperine metabolite C17H21NO3 (3)*	Xenobiotics	Food Component/Plant	62290	LC/MS Neg	100020491	3951	462.177					180078	168096	178863	161041	212913	208457	114149	137255	111023	79464	100649	85969		18010	25196	290726	304346	249797	64928	74927	72094	135298	177866	175351
4794	glucuronide of piperine metabolite C17H21NO3 (4)*	Xenobiotics	Food Component/Plant	62291	LC/MS Neg	100020492	3992	462.177					513708	632559	693179	669829	870319	783295	395716	339527	332907	320665	396797	383862	98304	127449	121039	751287	985768	1084621	292271	308029	357454	653988	608462	551060
4795	glucuronide of piperine metabolite C17H21NO3 (5)*	Xenobiotics	Food Component/Plant	62292	LC/MS Neg	100020493	4039	462.177					255436	214775	232673	186316	212150	252372	130516	179955	114231	94858	102871	87197	16541	25238	35529	395563	328169	288758	80092	74511	77171	163727	220958	274272
42	glutamate	Amino Acid	Glutamate Metabolism	57	LC/MS Pos Early	561	1500	148.06	611	56-86-0	C00025	HMDB00148	206172848	310327936	244780368	148314960	242914944	188992848	172946064	227040272	126557912	196036256	266950464	222330800	87024992	161684864	94922880	263480992	236093104	141026256	80706112	207675168	87808576	86215536	150312992	149287056
43	glutamine	Amino Acid	Glutamate Metabolism	53	LC/MS Pos Early	563	1291	147.076	5961	56-85-9	C00064	HMDB00641	1864515072	1634388224	1937120512	1794317440	1710807936	1667036032	2309479936	1834403328	1748497152	1552512256	1423128320	1465541632	1624822912	1806402304	1643188096	1750475520	1879667456	1724896128	2301582080	2034274688	2204271104	2395987712	1962850432	2083318784
5920	glutamine conjugate of C6H10O2 (1)*	Partially Characterized Molecules	Partially Characterized Molecules	63657	LC/MS Pos Early	100020261	2262	243.134					218296	256211	235051	535418	737420	468510	142872	169615	109168	174429	196350	147531	563335	607451	386753	192170	192930	160769	591721	548457	295670	183770	193164	153698
5921	glutamine conjugate of C6H10O2 (2)*	Partially Characterized Molecules	Partially Characterized Molecules	63660	LC/MS Neg	100020262	2526	241.119					186577	226742	276708	63117	139896	122197	94811	114158	75355	101458	160837	121859	325355	406689	296856	85834	70697	51008	556655	622397	263527	168347	135280	166629
5922	glutamine conjugate of C7H12O2*	Partially Characterized Molecules	Partially Characterized Molecules	63658	LC/MS Pos Early	100020259	2780	257.15					377004	382311	361811	186544	322330	246819	121964	109595	102935	187938	318270	227093	521287	416926	236313	238655	183643	151619	927127	1039980	468504	311557	231676	264901
1582	glutarate (C5-DC)	Lipid	Fatty Acid, Dicarboxylate	396	LC/MS Polar	339	2900	131.035	743	110-94-1	C00489	HMDB00661	593282	806831	584185	1236025	940201	610822	724410	671718	437981	290947	451630	226936	802011	1406612	557360	439162	845305	295617	607972	658110	311174	643929	771292	953612
120	glutarylcarnitine (C5-DC)	Amino Acid	Lysine Metabolism	44664	LC/MS Pos Early	100001593	2393	276.144	71464488	102636-82-8		HMDB13130	1899193	1780873	2001510	1218544	1406244	1050325	1669728	1535730	1363564	1373956	1536821	1560463	3005741	3193678	2717530	2.03812e+06	2.09348e+06	1.92078e+06	2909129	2647299	3034147	1410183	1113743	1075210
1179	glycerate	Carbohydrate	Glycolysis, Gluconeogenesis, and Pyruvate Metabolism	1572	LC/MS Polar	1052	2070.4	105.019	752	600-19-1	C00258	HMDB00139	21865772	20162506	22615560	24036342	25628244	20939116	20764402	18269208	14414435	27145390	21848908	22781276	27814032	37457424	25735476	32195864	31221486	23250938	30391140	26715832	27008454	34183484	28548374	33998724
2719	glycerol	Lipid	Glycerolipid Metabolism	15122	LC/MS Neg	1254	758	91.0401	753	56-81-5	C00116	HMDB00131	2.01878e+06	3.3958e+06	1597841	1481737	4212995	1259595	1173591	2507671	747833	2158154	5862062	1553666	4288753	8655068	2148381	2.94069e+06	6.13818e+06	2.01232e+06	6292915	6187619	2948033	1871009	4888013	4641128
2720	glycerol 3-phosphate	Lipid	Glycerolipid Metabolism	43847	LC/MS Pos Early	100000258	580	173.021	754	29849-82-9	C00093	HMDB00126	361408	482100	384775	285810	610132	371394	529445	550600	475459	308757	540774	283023	409831	710247	530626	461321	703838	440809	644590	523618	486759	436125	540590	542603
2131	glycerophosphoethanolamine	Lipid	Phospholipid Metabolism	37455	LC/MS Pos Early	100001620	659	216.063	123874	33049-08-0	C01233	HMDB00114	2874233	2602254	3166418	3169169	3495742	3521406	2609891	2672209	3091331	3605844	3026702	3894276	2784343	2704995	3519714	3668593	3792325	5439866	3404254	2231384	4474045	4020275	3581197	3535689
2133	glycerophosphoinositol*	Lipid	Phospholipid Metabolism	52307	LC/MS Neg	100001621	630	333.059	167572	16824-65-0			253279		269121	269156		340950	185723		317456	341893		248264	179467		476281	158671		918507	372918		440498	499273	282493	215086
2127	glycerophosphorylcholine (GPC)	Lipid	Phospholipid Metabolism	15990	LC/MS Pos Early	100000269	672	258.11	71920	28319-77-9	C00670	HMDB00086	70054936	40507432	83520928	82621984	49907528	83072160	63794128	42838232	72192120	79853912	38688984	90381056	62564228	39811672	95174552	70596792	64471840	154153248	105941872	44732028	157892944	124843176	83765952	70813200
2132	glycerophosphoserine*	Lipid	Phospholipid Metabolism	57404	LC/MS Pos Early	100015666	577	260.053	3081457				61478	39259		64291	73444	67627	76697	52253	45286	51180	36297	35724	90918	100398	80600	87117	31924	49861	28807		31559	46547	39355	46521
1	glycine	Amino Acid	Glycine, Serine and Threonine Metabolism	58	LC/MS Pos Early	340	1375	76.0393	750	56-40-6	C00037	HMDB00123	70056920	60938412	76622920	94506872	87650272	96830088	102957104	87668064	90123200	65957680	65050608	71707912	80087640	86360776	92995504	77257496	84172608	81935088	109524976	95042016	116372984	88433584	79465088	82754624
5938	glycine conjugate of C10H12O2*	Partially Characterized Molecules	Partially Characterized Molecules	62145	LC/MS Neg	100020253	4005	220.098					105995	136441	122185	33218	63318	33441				36340	42741	35025	62783	80304	50312	80297	96571	62411	38411	29878	24075	84431	91237	92867
5939	glycine conjugate of C10H14O2 (1)*	Partially Characterized Molecules	Partially Characterized Molecules	62146	LC/MS Neg	100020254	4335	222.114					846540	923656	901033	210669	266313	126774	45033	98776		71584	57615	37023	438467	486570	324313	545537	692030	483733	541538	412779	299481	649703	805239	844863
3321	glyco-beta-muricholate	Lipid	Primary Bile Acid Metabolism	62066	LC/MS Neg	100020214	4762	464.302					29967	22112	47174	122385	163775	333966		19036	18380	85336	75519	111709	140716	153117	231667			23524	32934	36414	95709	255501	149880	159770
3313	glycochenodeoxycholate	Lipid	Primary Bile Acid Metabolism	32346	LC/MS Neg	1628	5236.1	448.307	12544	16564-43-5	C05466	HMDB00637	4925605	1583898	6188790	10706566	4714102	11140708	8.24115e+06	7.59057e+06	8135813	5833614	5184705	9773045	19185476	8.19466e+06	18169232	7857928	3252033	8.34819e+06	3323895	1657135	4727767	16852374	6958597	7298303
3326	glycochenodeoxycholate 3-sulfate	Lipid	Primary Bile Acid Metabolism	52974	LC/MS Neg	100006641	4820	263.628					277048	266097	334391	126394	252471	275177	624479	658394	477298	643048	763477	540209	679292	822401	976540	322828	303965	427632	308578	289338	370369	911914	797780	816157
3324	glycochenodeoxycholate glucuronide (1)	Lipid	Primary Bile Acid Metabolism	52983	LC/MS Neg	100009264	4806	311.666					896645	928390	1.02241e+06	539140	901323	1055470	136051	140461	85643	449382	589701	471858	406872	481045	428498	291496	344911	336226	127604	141506	168000	751940	824088	825559
3306	glycocholate	Lipid	Primary Bile Acid Metabolism	18476	LC/MS Neg	342	5163	464.302	10140	475-31-0;863-57-0	C01921	HMDB00138	787700	489295	1265104	2892089	2618030	3612797	1729452	2188343	2178493	2828576	2936355	4663747	3377008	2283756	5123297	1235655	801853	1644775	686592	495078	1172829	2994289	1363903	1385749
3384	glycocholenate sulfate*	Lipid	Secondary Bile Acid Metabolism	32599	LC/MS Neg	100001989	4750	254.623					2762860	2753497	2728883	1882658	2583268	2001187	2115719	2007464	1591346	1650567	1815713	1511623	3006051	3385245	3000195	3.01741e+06	2977246	2483499	3020545	2538722	2632016	2552246	2519193	2499907
3338	glycodeoxycholate	Lipid	Secondary Bile Acid Metabolism	18477	LC/MS Neg	100000436	5281	448.307	3035026	360-65-6	C05464	HMDB00631	3608036	1345127	4662411	18342992	12001395	25982290	879508	766017	816244	7716545	8303587	12624133	11237839	5480012	10922860	1815815	777042	2042463	1428528	872864	2239372	8682104	4227310	4011309
3389	glycodeoxycholate 3-sulfate	Lipid	Secondary Bile Acid Metabolism	52975	LC/MS Neg	100006642	4875	263.628					551033	532529	649128	710555	1432299	1426172	158286	130640	94815	1258106	1670302	1093916	1130599	1488549	1571731	180130	210838	239112	498252	514781	540424	1078701	964595	977281
3375	glycohyocholate	Lipid	Secondary Bile Acid Metabolism	42574	LC/MS Neg	100004083	5020	464.302					28988		41585	25566		75725	71594	83378	90928	93398	76181	101478	157246	115151	180163	66426	26650	60327		21900	75738	368740	145807	162127
3348	glycolithocholate	Lipid	Secondary Bile Acid Metabolism	31912	LC/MS Neg	100001064	5357.1	432.312	115245	474-74-8	C15557	HMDB00698	177810		232906	822431	234653	684098	171722	67796	99795	192556	68109	295841	872668	181341	1334085	188878	87461	449493			104078	290892		36569
3349	glycolithocholate sulfate*	Lipid	Secondary Bile Acid Metabolism	32620	LC/MS Neg	100001657	5011	255.631	72222	15324-64-8	C11301	HMDB02639	2668522	2477752	2826727	2010459	4239135	4222993	2283051	1965352	1451907	3.91853e+06	4.1467e+06	3.34707e+06	7.27688e+06	10067138	12037443	2593039	2854177	4075832	1716015	1740019	2279145	5104285	4846708	4705056
2950	glycosyl ceramide (d16:1/24:1, d18:1/22:1)*	Lipid	Hexosylceramides (HCER)	57457	LC/MS Pos Late	100015730	3373	782.65					675319	616126	504492	459351	593663	427519	625508	723176	592995	440562	850571	580456	321203	458556	423430	832452	1.05419e+06	751896	931653	1.13127e+06	922865	381802	640117	484896
2948	glycosyl ceramide (d18:1/20:0, d16:1/22:0)*	Lipid	Hexosylceramides (HCER)	57595	LC/MS Pos Late	100015882	3414	756.635					1100574	2462454	2499892	3173414	4409575	3156420	4393780	4715461	3835458	2668289	3075037	2513595	2356423	3079549	2391393	5078388	5387222	4614916	4570904	4837162	4644423	3418468	3479838	3.66777e+06
2951	glycosyl ceramide (d18:1/23:1, d17:1/24:1)*	Lipid	Hexosylceramides (HCER)	57448	LC/MS Pos Late	100015751	3667	796.666						255322	404077	367432	541146	314707	889527	697749	833410	665696	492957	521489	312114	647966	319441	805626	857560	722863	1.02648e+06	1325163	910896	716994	463738	630183
2952	glycosyl ceramide (d18:2/24:1, d18:1/24:2)*	Lipid	Hexosylceramides (HCER)	57453	LC/MS Pos Late	100015745	3380	808.666					1602476	1813830	1614168	1926014	2698665	2106222	2747514	3207254	2232455	2031528	2661629	2147702	3178737	3.99062e+06	3043791	2827940	3355553	2770425	4416673	4512589	4429490	4068120	3.96153e+06	4089465
2934	glycosyl-N-(2-hydroxynervonoyl)-sphingosine (d18:1/24:1(2OH))*	Lipid	Hexosylceramides (HCER)	57444	LC/MS Pos Late	100015752	3839	826.677					3348395	3519770	4.09047e+06	1.94135e+06	2761505	1686817	1544952	2100254	1634776	1316463	1457651	1631447	746624	963712	1453158	2842399	4773793	2886856	2244613	2483849	1549929	1712783	1325750	708978
2938	glycosyl-N-behenoyl-sphingadienine (d18:2/22:0)*	Lipid	Hexosylceramides (HCER)	57421	LC/MS Pos Late	100015625	3420	782.65					1613218	1.964e+06	2190209	2304134	3.22787e+06	2369270	3.40606e+06	3757114	2942859	2122124	2600149	2053273	3394468	4.2633e+06	3448675	3451448	3509713	2988762	4279225	4702188	4590937	3.75322e+06	3.24952e+06	3755358
2927	glycosyl-N-palmitoyl-sphingosine (d18:1/16:0)	Lipid	Hexosylceramides (HCER)	53013	LC/MS Pos Late	100009272	2623	700.572					6318131	6292815	6959611	6829439	7.55785e+06	8020298	9235096	10037933	8739565	6178016	7053831	6229523	8751373	9513334	8486967	10004166	9652574	8965974	11082315	11353438	10646967	11448540	11765596	11702598
2928	glycosyl-N-stearoyl-sphingosine (d18:1/18:0)	Lipid	Hexosylceramides (HCER)	52234	LC/MS Pos Late	100001882	3053	728.604					1403425	1532570	1504169	1512839	1.93597e+06	1700192	2152338	2497177	1900069	1776108	1935782	1768970	1539031	1834304	1276318	2991100	3160597	2926733	2793649	2686535	3015428	2173248	2.08638e+06	2188810
2939	glycosyl-N-tricosanoyl-sphingadienine (d18:2/23:0)*	Lipid	Hexosylceramides (HCER)	57445	LC/MS Pos Late	100015748	3724	796.666					812514	846635	883696	884261	1178853	1045049	1756267	1985025	1247337	1372239	2163613	1215938	1157534	1412953	1105112	1.73907e+06	1919700	1811753	2337684	2030223	2421467	1.47443e+06	1.73985e+06	1396874
3363	glycoursodeoxycholate	Lipid	Secondary Bile Acid Metabolism	39379	LC/MS Neg	100002911	5033	448.307	12310288	64480-66-6		HMDB00708	431733	169439	499345	682604	401051	899259	549145	442714	607635	385662	325926	632033	2182132	1142485	2430205	257766	134641	288955	212952	137241	371861	833510	301857	305627
3366	glycoursodeoxycholic acid sulfate (1)	Lipid	Secondary Bile Acid Metabolism	63731	LC/MS Neg	100020819	4309	263.628					192082	226038	213399	43378	84665	41665		62366	46855			47094	228971	296676	192488		39632		26334	33178		26691	32335
3398	glycoursodeoxycholic acid sulfate (2)	Lipid	Secondary Bile Acid Metabolism	63732	LC/MS Neg	100020820	4610	263.628					83753	106152	101233	90736	228549	179780				67642	91465	95440	15061				25355		17320				19222
4331	guaiacol sulfate	Xenobiotics	Benzoate Metabolism	46111	LC/MS Neg	100004208	2344	203.002	22473			HMDB60013	1498709	1648681	1227068	7123081	9135453	6779338	3112096	3684752	2719918	8600911	10795289	7469005	2727781	3519337	2948165	2251981	2782452	2412619	4465721	4696682	5338509	7029071	8489334	8719796
479	guanidinoacetate	Amino Acid	Creatine Metabolism	43802	LC/MS Polar	344	2884	116.047	763	352-97-6	C00581	HMDB00128	248568	233621	234723	273957	318029	230082	340150	398926	342863	285713	353518	240370	148294	290881	241626	272272	369039	244789	270285	313638	299515	315582	373352	420727
515	guanidinosuccinate	Amino Acid	Guanidino and Acetamido Metabolism	32446	LC/MS Neg	100001212	640.2	174.052	97856	6133-30-8	C03139	HMDB03157	361363	346010	378128	375431	393195	293493	497373	481020	442528	451285	375631	404311	417810	321264	380456	276750	280176	279214	691089	458871	476334	359082	245425	217590
4029	guanosine	Nucleotide	Purine Metabolism, Guanine containing	1573	LC/MS Neg	1099	1662	282.084	6802	118-00-3	C00387	HMDB00133	306374	435720	118219	208841	253383	119126	229462	337670	271459	232339	203847		443323	169872	350354	461185	419794	121850	218241	465838	309035	533368	384955	408607
4194	gulonate*	Cofactors and Vitamins	Ascorbate and Aldarate Metabolism	46957	LC/MS Polar	100001586	2750	195.051	152304	20246-53-1	C00257	HMDB03290	2424991	2688067	2418268	3.87331e+06	4504628	3052866	2606661	2125457	1548015	3264275	3.70518e+06	3174019	3.51688e+06	5762302	3.44135e+06	4443212	3631841	2858888	3590231	3498597	2584957	3.87143e+06	3325650	3219435
4243	heme	Cofactors and Vitamins	Hemoglobin and Porphyrin Metabolism	41754	LC/MS Pos Late	100001386	1124	616.176	26945	14875-96-8	C00032	HMDB03178	3748413	1451052	3.42139e+06	1764835	3026922	1531357	5957225	909258	843384	2427287	784257	5538482	1829189	12127769	1836485	2731704	1194988	1342482	4161262	449159	1470640	1549478	896219	836349
1417	heptanoate (7:0)	Lipid	Medium Chain Fatty Acid	1644	LC/MS Neg	925	3670	129.092	8094	111-14-8	C17714	HMDB00666	356212	335835	1077546	284335	452111	599494	1185537	355487	502876	349876	424403	450454	243627	284750	439059	416490	318393	382422	384377	407187	390646	1236238	395347	389333
1597	heptenedioate (C7:1-DC)*	Lipid	Fatty Acid, Dicarboxylate	61866	LC/MS Polar	100019981	2816	157.051					1099619	1202479	1.49465e+06	316117	456740	264482	651022	674282	562433	797346	887778	666018	572528	820010	372355	556391	1.00991e+06	514258	768248	705537	719541	858124	730200	882960
1491	hexadecadienoate (16:2n6)	Lipid	Long Chain Polyunsaturated Fatty Acid (n3 and n6)	57652	LC/MS Neg	100009394	5398	251.202	13932172	28290-73-5		HMDB00477	2942244	1662427	1405493	446131	840822	579211	427282	802722	285757	1.03557e+06	1939956	1322735	1914258	3.6833e+06	1044903	2718378	2894384	1482651	5742215	3945792	4885502	2116444	3261025	3346592
1618	hexadecanedioate (C16)	Lipid	Fatty Acid, Dicarboxylate	35678	LC/MS Neg	100001614	4615	285.207	10459	505-54-4	C19615	HMDB00672	718854	711400	790439	304339	334090	378628	510525	509369	406147	513273	695302	631459	445860	562645	492096	537969	480987	383581	1.62444e+06	961458	837592	981877	663884	686281
1619	hexadecenedioate (C16:1-DC)*	Lipid	Fatty Acid, Dicarboxylate	61862	LC/MS Neg	100019975	4380	283.192					416198	415831	569020	469817	534803	578198	525656	508843	503634	432310	492136	470240	475215	474908	610569	365633	334051	382878	696000	495862	497059	591322	469684	443796
1762	hexanoylcarnitine (C6)	Lipid	Fatty Acid Metabolism (Acyl Carnitine, Medium Chain)	32328	LC/MS Pos Early	100000781	3358	260.186	6426853	6920-35-0		HMDB00705	1.21828e+06	988047	1303318	377226	425302	757197	666934	719304	827976	903899	1365090	1248860	1144498	1517021	1053155	1116798	1244408	1.42219e+06	1217345	1187599	1.7439e+06	1706860	1357408	1190618
1702	hexanoylglutamine	Lipid	Fatty Acid Metabolism (Acyl Glutamine)	54907	LC/MS Neg	100001733	2780	243.135					130628	135329	171693		36455	34255	127052	153622	101981	102604	139979	98498	74480	76973	52814	118271	80302	57760	217872	187838	100214	176277	151137	158494
1724	hexanoylglycine (C6)	Lipid	Fatty Acid Metabolism (Acyl Glycine)	35436	LC/MS Neg	100001527	2900	172.098	99463	24003-67-6		HMDB00701	61292		77681				121809	86609	68684	83187	85449	78703				80526	52467		173806	92865	128937	98282	92174	101195
4294	hippurate	Xenobiotics	Benzoate Metabolism	15753	LC/MS Neg	100000014	2106.9	178.051	464	495-69-2	C01586	HMDB00714	50158536	59911392	38971648	66149824	150620736	110729280	75055352	91856616	47013904	87266952	170015520	146664960	8131969	12845108	9551967	30957726	56947008	55924936	52082760	59879000	59517016	61754052	81233968	80777744
67	histidine	Amino Acid	Histidine Metabolism	59	LC/MS Neg	355	755.9	154.062	6274	5934-29-2	C00135	HMDB00177	93877456	89637872	103693520	91705536	101882792	75732664	88135120	97723120	112644360	61084588	64374468	90310448	71354544	72664728	94520840	71951776	91628568	78970280	107677928	97857304	91808728	87001280	87492912	83231648
4719	histidine betaine (hercynine)*	Xenobiotics	Food Component/Plant	62278	LC/MS Pos Early	100004059	2094	198.124	3083620	534-30-5			2499118		2834749	3.30975e+06		3008607	1897478		3.50669e+06	1495730		3169503	735628		1023022	1887291	395562	3.3909e+06	802056		3392319	4446166
779	histidylalanine	Peptide	Dipeptide	42027	LC/MS Neg	100003542	970	225.099	351667	16874-75-2		HMDB28878					48637			113884			27826			256868			110739			160366			16706
446	homoarginine	Amino Acid	Urea cycle; Arginine and Proline Metabolism	22137	LC/MS Pos Early	100000961	2882	189.135	9085	156-86-5	C01924	HMDB00670	16649788	15494208	20955786	18802980	19135256	17677826	22360364	17168064	19388220	13471801	13307762	14520797	13993331	16805210	16926932	20506364	22673450	22973494	14476725	12122820	14591978	31546344	27210680	26055650
447	homocitrulline	Amino Acid	Urea cycle; Arginine and Proline Metabolism	22138	LC/MS Neg	100000963	789	188.104	65072	1190-49-4	C02427	HMDB00679	212942	221087	227129	293426	329121	329682	318929	299103	308013	229543	269682	269442	241381	218664	159343	257176	277486	228047	248072	212618	240591	235445	196042	251728
4722	homostachydrine*	Xenobiotics	Food Component/Plant	33009	LC/MS Pos Early	100001550	1750	158.118	441447	1195-94-4	C08283	HMDB33433	2638550	2529768	2936131	2365871	2518688	2401174	2696342	2272748	2.0647e+06	2959701	2742750	2892518	2421564	2957126	2618511	4483337	4888080	4.07801e+06	3948639	3731693	4169710	5728168	4948671	4920486
200	homovanillate (HVA)	Amino Acid	Tyrosine Metabolism	1101	LC/MS Neg	117	1649	181.051	1738	306-08-1	C05582	HMDB00118	54907	82718	65609			47217	79204	84005	54763	61941	73300	54170	81774	82470	43473	75590	83130	42416	100674	80349	47085	43382	60455	100150
73	hydantoin-5-propionate	Amino Acid	Histidine Metabolism	40473	LC/MS Polar	100002514	2080	171.041	782	5624-26-0	C05565	HMDB01212	321311	448012	567570	225579	286209	188760	501829	544118	423070	426312	499509	360702	788600	944682	801671	219077	279894	183409	240742	233140	256253	297273	322751	357142
5597	hydroquinone sulfate	Xenobiotics	Drug - Topical Agents	35322	LC/MS Neg	100001604	1395	188.986	161220	123-31-9	C00530	HMDB02434	179865	279952	145953	281127	487426	344680	419017	639482	348978	449672	819191	623392	118584	182193	173802	262131	462853	264260	34075	61905	46464	94131	149294	144467
1629	hydroxy-CMPF*	Lipid	Fatty Acid, Dicarboxylate	62277	LC/MS Polar	100019794	2153	255.087					6328602	6162777	6977583	7979509	9649625	8876085	2328312	2415144	1.93341e+06	3123413	3166274	2818133	5656787	7.33014e+06	6073439	2739021	2958009	2515649	7018039	7482952	7.57509e+06	6.83204e+06	5773626	6937333
111	hydroxy-N6,N6,N6-trimethyllysine*	Amino Acid	Lysine Metabolism	62959	LC/MS Pos Early	100021123	2759	205.155					332165	355334	390983	567616	694244	612040	1003724	720470	695961	669632	526544	549226	659028	819508	671943	624531	597139	556590	507677	443039	621726	582118	583861	492150
41	hydroxyasparagine	Amino Acid	Alanine and Aspartate Metabolism	62060	LC/MS Pos Early	100020205	1149	149.056	97663		C03124	HMDB32332	769445	688879	883819	902232	897394	888086	884780	762207	708411	875735	765451	727775	800855	914666	819437	874897	928626	747501	952588	784053	903777	802641	659789	719836
4430	hydroxycotinine	Xenobiotics	Tobacco Metabolite	38661	LC/MS Pos Early	100002717	2030	193.097	10219774	34834-67-8		HMDB01390							1644764	1522149	1433309
2974	hydroxypalmitoyl sphingomyelin (d18:1/16:0(OH))	Lipid	Sphingomyelins	62851	LC/MS Pos Late	100021000	2056	719.57					3424051	3613279	3974345	4047994	4718995	4794578	4040928	4184206	3620347	4184742	5144953	3.98313e+06	5034378	5840694	4642646	6145907	5785556	5576101	4480276	4759301	5657801	4836416	4830485	4945294
425	hypotaurine	Amino Acid	Methionine, Cysteine, SAM and Taurine Metabolism	590	LC/MS Polar	358	2763.4	108.013	107812	300-84-5	C00519	HMDB00965	79884	74187	67144	49790	92140	73989	188908	142113	94018	110221	60319	31922	173985	236919	178855	87264	90935	36631	104182	105110	80842	111950	103188	131317
3968	hypoxanthine	Nucleotide	Purine Metabolism, (Hypo)Xanthine/Inosine containing	3127	LC/MS Pos Early	171	1295	137.046	790	68-94-0	C00262	HMDB00157	44827452	95291000	16561543	49723420	121277288	6665224	43607568	61784980	14407446	76795168	62083996	14804822	39148248	101317920	18814684	64460436	139309168	12488457	38348748	65855368	13887654	28548120	34580208	37043976
78	imidazole lactate	Amino Acid	Histidine Metabolism	15716	LC/MS Pos Early	100000263	2040	157.061	793	14403-45-3	C05568	HMDB02320	5978836	5858035	6.31629e+06	5806445	6160362	5357993	3412069	3607212	3100543	5727887	5819004	4906221	3899276	3820932	4.16515e+06	4974507	5200215	4786246	5848540	5259313	5672156	6187659	7131144	7093839
76	imidazole propionate	Amino Acid	Histidine Metabolism	40730	LC/MS Pos Early	100003434	2263	141.066	70630	1074-59-5		HMDB02271	294318	253053	189540	395088	361189	355124	707543	742525	471406	318356	478271	375776	924499	1077028	1100767	343089	405501	320464	464091	399472	512557	295950	281092	360361
287	indole-3-carboxylate	Amino Acid	Tryptophan Metabolism	38116	LC/MS Neg	100002185	1710	160.04	69867	771-50-6	C19837	HMDB03320	31232	30032	31950	70722	79634	154721	60860	32987	33601	54601	49777	60192	26015	33079	33817	34659	43344	31292	38710	20547	51591	37037	27771	35622
279	indoleacetate	Amino Acid	Tryptophan Metabolism	27513	LC/MS Neg	100001034	2200	174.056	802	6505-45-9	C00954	HMDB00197	1730915	1789282	2029614	6877123	8594189	7580090	2717542	2573263	2256678	2337948	2531775	2066399	1677571	1705908	1618976	3122977	3097516	3515825	2386244	2385629	2527084	2101157	2120108	2095278
290	indoleacetoylcarnitine*	Amino Acid	Tryptophan Metabolism	62279	LC/MS Pos Early	100020479	3114	319.165					102571	106643	126668	1012614	793630	938763	177086	137802	107234	178649	144695	146089				138786	138329	169807	102302	117394	118249	273476	292985	293465
284	indoleacetylglutamine	Amino Acid	Tryptophan Metabolism	42087	LC/MS Neg	100001731	2535	302.115	25200879			HMDB13240	26149		24760	230191	288154	221959	33633	34203	25774	29850	37829	25322	21965	30606		29505	47083	49206	23962	25351	29649	37330	47201	49826
278	indolelactate	Amino Acid	Tryptophan Metabolism	18349	LC/MS Neg	100000463	2286	204.067	92904	832-97-3	C02043	HMDB00671	12013467	11692076	11185405	22130654	23872386	19296216	18419120	16786838	12686848	17414180	16839680	12157096	20381678	21161700	15992764	18279028	16081630	13336761	18686184	18146374	18671924	17293444	17196356	17387292
282	indolepropionate	Amino Acid	Tryptophan Metabolism	32405	LC/MS Neg	100001083	2795	188.072	3744	830-96-6		HMDB02302	1198301	1231327	1230072	1063051	1396388	1253961	1918054	2108950	1.71222e+06	1247878	1414046	1162134	4135417	5299777	5113133	1390451	1700628	1688263	3089210	3429843	3517438	2074264	2234944	2183658
4726	indolin-2-one	Xenobiotics	Food Component/Plant	43374	LC/MS Pos Early	100004318	2575	134.06	321710	59-48-3	C12312		153188	168157	127738	182040	249782	173727	248007	182234	128135	299856	335848	321945				143610	101474	156550	239261	137364	158612	252431	243334	247635
3967	inosine	Nucleotide	Purine Metabolism, (Hypo)Xanthine/Inosine containing	1123	LC/MS Neg	361	1602.1	267.074	6021	58-63-9	C00294	HMDB00195	4541185	4993341	1991040	2062513	3353517	1380676	2961206	3000007	3596697	2.08012e+06	2123599	467567	5486766	3089157	3.89175e+06	5137240	4895917	1736289	2404849	3.77888e+06	3599474	5439289	3.29413e+06	3229907
381	isobutyrylcarnitine (C4)	Amino Acid	Leucine, Isoleucine and Valine Metabolism	33441	LC/MS Pos Early	100001055	2810	232.154	168379	25518-49-4		HMDB00736	8551673	8344090	9992416	10323802	10521475	9452857	17206854	13953647	10316733	16865944	17257368	14979816	12683173	14998032	10193095	9168735	10738994	6480527	5818813	4946931	5408364	9224987	9728174	9944286
382	isobutyrylglycine (C4)	Amino Acid	Leucine, Isoleucine and Valine Metabolism	35437	LC/MS Neg	100001590	1420	144.067	10855600	15926-18-8		HMDB00730	148277	153078	185860	190399	231048	182366	280984	243206	179444	293443	318076	220273	322881	331258	327072	166283	158160	175102	226246	215839	185345	170588	182998	168894
1373	isocitrate	Energy	TCA Cycle	12110	LC/MS Pos Early	1206	773	210.061	1198	20226-99-7	C00311	HMDB00193	1043381	1338169	1102440	1334838	1621783	504699	863132	920634	761799	1251847	1393908	685856	1884711	1506259	1160503	1594274	1477002	1460805	1555765	1952275	1181278	1.8389e+06	1736583	1511583
4910	isoeugenol sulfate	Xenobiotics	Food Component/Plant	48997	LC/MS Neg	100006089	3893	243.033					46272	58873	60661	700428	970265	1.02011e+06	273323	320171	312511	615108	559433	498908		37224		314396	423684	459298	77593	100914	143763	92272	93827	104430
347	isoleucine	Amino Acid	Leucine, Isoleucine and Valine Metabolism	1125	LC/MS Pos Early	376	2800	132.102	6306	73-32-5	C00407	HMDB00172	799194624	766318336	1078778880	890446592	890745216	1012431552	1088899200	834864640	1044844096	884294848	769726976	946651264	1217792896	1301490176	1419888640	1037832064	956812288	1025181696	839894400	790828096	879181120	840544960	830187008	851346688
798	isoleucylglycine	Peptide	Dipeptide	40008	LC/MS Neg	100003169	1992	187.109	342532	868-28-0		HMDB28907	147622	115017	120509	220880	225471	173266	323537	128378	140716	304902	150295	59401	220905	142838	134450	227738	127938	191087	178940	111986	160717	223509	164893	183985
3358	isoursodeoxycholate	Lipid	Secondary Bile Acid Metabolism	57577	LC/MS Neg	100002488	4809	391.285	127601	78919-26-3	C17662	HMDB00686	401134	478122	547582	447175	641699	616670	251098	226731	153864	255441	358537	371489	730510	1005772	846830	171485	265341	288860	234096	269568	295480	134808	152479	149383
315	isovalerate (C5)	Amino Acid	Leucine, Isoleucine and Valine Metabolism	44656	LC/MS Neg	100000708	1564	101.061	10430	503-74-2	C08262	HMDB00718	1.57098e+06	1246637	2.05038e+06	1.87538e+06	1462313	1126660	1.70226e+06	1144001	1573762	1.52395e+06	1113291	789005	1489960	2191358	1799178	1.67553e+06	1624653	1300109	1313777	987277	1.50351e+06	2.09018e+06	1350349	1191278
318	isovalerylcarnitine (C5)	Amino Acid	Leucine, Isoleucine and Valine Metabolism	34407	LC/MS Pos Early	100001393	3085	246.17	6426851	31023-24-2		HMDB00688	6895286	6096199	7961504	4290395	3560029	3307923	4634533	3677536	3772060	6198878	5039077	4.032e+06	3315024	4700209	5300572	4052598	3892302	2771057	2150498	2022564	2349998	3571909	3987643	4.00861e+06
317	isovalerylglycine	Amino Acid	Leucine, Isoleucine and Valine Metabolism	35107	LC/MS Neg	100001452	1950	158.082	546304	16284-60-9		HMDB00678	190879	193958	219196	275469	341432	260032	327558	304290	277878	257072	297652	207660	418536	475740	402351	204817	219829	169728	238140	222225	184332	229568	285293	285405
256	kynurenate	Amino Acid	Tryptophan Metabolism	1417	LC/MS Neg	98	2224	188.035	3845	492-27-3	C01717	HMDB00715	547010	616088	610106	1137131	2056210	1322301	1523279	1783602	1457612	944259	1306010	862732	1318882	1802027	1026237	1222844	1430915	797511	895971	835851	931712	838622	1045459	1037062
252	kynurenine	Amino Acid	Tryptophan Metabolism	15140	LC/MS Pos Early	100000265	2739	209.092	161166	2922-83-0	C00328	HMDB00684	9153757	9585384	10395695	13906326	15929160	13398370	16971224	15446069	15809738	11832844	12054680	11032944	11327933	12089886	11395666	9992309	10732929	9408417	14554813	13773765	16043317	16693941	15249691	15542410
4250	L-urobilin	Cofactors and Vitamins	Hemoglobin and Porphyrin Metabolism	40173	LC/MS Pos Late	100002568	901	595.349	5280818	34217-90-8	C05793	HMDB04159	739187	372063	601565	177674	100227	148397	153580	85475	114512	218447	135640	426163				70347		39057	407965	77913	150388	212387	93452	52931
1176	lactate	Carbohydrate	Glycolysis, Gluconeogenesis, and Pyruvate Metabolism	527	LC/MS Polar	482	1469	89.0244	612	79-33-4	C00186	HMDB00190	435085568	1371552512	296910912	450693760	1850798080	516993696	471898592	1417576576	259125728	685606016	1724676608	432196544	718532544	2253269760	404514816	688346304	1871168896	902534976	805062464	2274865664	206996224	328360128	1055227840	1137822848
5037	lactobacillic acid	Xenobiotics	Bacterial/Fungal	63048	LC/MS Neg	100021065	5822	295.264	10417	503-06-0			2031487	1661255	1605905	329154	730726	674845	789883	928802	401991	1356105	1862657	1.9576e+06	1834843	2390631	1251231	2041059	1479104	1294321	3946478	2268542	2882485	2075274	1416249	1750545
2960	lactosyl-N-behenoyl-sphingosine (d18:1/22:0)*	Lipid	Lactosylceramides (LCER)	57422	LC/MS Pos Late	100015623	3842	946.719					585022	729323	815108	791638	1177315	709901	759478	727117	555464	334065	578090	727504	1289809	1.67598e+06	1443907	1069827	1375633	1035549	1167433	1357409	433265	780573	977706	959351
2961	lactosyl-N-nervonoyl-sphingosine (d18:1/24:1)*	Lipid	Lactosylceramides (LCER)	57370	LC/MS Pos Late	100015620	3778	972.735					4156333	4355276	4404384	3743681	5031006	4.07417e+06	4824134	5752718	4248479	3428461	4175545	3185432	7.0764e+06	9028277	6.47525e+06	5065710	5138591	4468634	7024175	7118692	7.34677e+06	5456333	5351125	5.36982e+06
2957	lactosyl-N-palmitoyl-sphingosine (d18:1/16:0)	Lipid	Lactosylceramides (LCER)	53010	LC/MS Pos Late	100009030	2527	862.625		4201-62-1			17682542	18316012	19486698	15162931	21910504	17605332	23378852	24962714	19364598	18017680	23471360	17113868	33617180	42791488	30649094	28784452	32578948	28052736	31694000	32971176	33158652	23859232	24161468	23659782
1427	laurate (12:0)	Lipid	Medium Chain Fatty Acid	1645	LC/MS Neg	181	5300	199.17	3893	143-07-7	C02679	HMDB00638	68338472	40776504	44179192	10489755	15713993	12729201	28824424	39687012	14432191	41074464	63645752	62907928	47978416	104938328	45696868	39139148	65490036	32359734	109683512	96695992	122635840	88276720	119031800	122253680
1777	laurylcarnitine (C12)	Lipid	Fatty Acid Metabolism (Acyl Carnitine, Medium Chain)	34534	LC/MS Pos Late	100001392	1235	344.279	10427569	25518-54-1		HMDB02250	3045145	2177674	3497694	454795	604988	988156	1037559	1142772	1169955	1595327	3056627	2476363	3694349	4.00543e+06	4194529	2550315	3.6589e+06	4113050	3791827	2790421	4998098	5260986	2872957	3044551
300	leucine	Amino Acid	Leucine, Isoleucine and Valine Metabolism	60	LC/MS Pos Early	397	2864	132.102	6106	61-90-5			944789632	905784640	1243094016	1045265728	1030900736	1211515648	1304042880	992122048	1224812288	958265088	879874112	1050792256	1189050240	1338696960	1477376384	1123372672	1079553792	1146688768	975170432	932801920	1026879360	990807360	929770944	955359040
2978	lignoceroyl sphingomyelin (d18:1/24:0)	Lipid	Sphingomyelins	57330	LC/MS Pos Late	100006298	3437	815.7		60037-60-7			202462496	204153536	222575616	222036784	274935040	246672688	172707552	188207568	153818240	210983968	224895552	216447328	306109408	391440192	305601920	307305344	323023456	304140640	240711888	240192128	264044848	327784800	317992896	313373440
1785	lignoceroylcarnitine (C24)*	Lipid	Fatty Acid Metabolism (Acyl Carnitine, Long Chain Saturated)	57515	LC/MS Pos Late	100015834	1603	512.467					1136734	1.0218e+06	1304517	739353	1035942	888248	1282030	1311930	1096957	801997	1020805	866705	1177412	1875382	1425288	1367635	1712322	1638670	812021	974144	1.04736e+06	1333486	1298527	1196832
1492	linoleate (18:2n6)	Lipid	Long Chain Polyunsaturated Fatty Acid (n3 and n6)	1105	LC/MS Neg	180	5535	279.233	5280450	60-33-3	C01595	HMDB00673	433405376	350831616	358023104	193203056	231639280	325548608	178611520	213327792	150189328	318414656	423429216	419845280	485618368	970041600	321784832	803863040	821175936	525646560	1504495872	1054506432	1351092352	728971072	963564032	1043583360
1494	linolenate (18:3n3 or 3n6)	Lipid	Long Chain Polyunsaturated Fatty Acid (n3 and n6)	34035	LC/MS Neg	100001337	5450	277.217	5280934		C06426	HMDB03073	70353024	70434256	65661264	27525804	41805040	29688932	15145547	21703548	8071884	29491436	51878868	40948440	97836688	205130384	60569864	108751600	127046480	64064356	241980080	169320688	222889472	106483744	164760480	172622464
1805	linolenoylcarnitine (C18:3)*	Lipid	Fatty Acid Metabolism (Acyl Carnitine, Polyunsaturated)	57511	LC/MS Pos Late	100015831	1310	422.327					256674	330211	374612		117562	114774							483960	554722	395442	428441	477783	361466	450838	402266	300797	386830	304644	377247
2075	linoleoyl ethanolamide	Lipid	Endocannabinoid	52608	LC/MS Neg	100006726	6150	322.275	5283446	68171-52-8		HMDB12252	46027	26012	45248	47189		42144	20165			72120	38981	60233	82818	36427	58184	164124	62249	84595	190464	70226	124759	101371	41242	37396
2819	linoleoyl-arachidonoyl-glycerol (18:2/20:4) [1]*	Lipid	Diacylglycerol	54955	LC/MS Pos Late	100010922	2590	658.54					2753208	3352821	3804518	1289732	1284792	975761	1036941	1320398	1236377	1848082	1721797	1723485	4110095	5722792	4198889	4864534	6525166	3716267	2565110	1340782	2425941	1583002	1961774	2233202
2820	linoleoyl-arachidonoyl-glycerol (18:2/20:4) [2]*	Lipid	Diacylglycerol	54956	LC/MS Pos Late	100010923	2650	658.54					4.02394e+06	4602617	5434940	1932104	2232923	2175286	1630213	1854720	1470847	2241057	2145526	2682795	6597738	10833881	8007400	9439048	9610841	7665602	3123624	3045770	4241870	2061803	3579674	3.60944e+06
2823	linoleoyl-docosahexaenoyl-glycerol (18:2/22:6) [1]*	Lipid	Diacylglycerol	54949	LC/MS Pos Late	100010928	2450	682.54					2412982	2473645	2875907	748398	1086640	831715				1113981	434168	446974	1598674	2897665	2279322	2228568	2917829	2587509	2698768	3084424	4149653	1781062	1702356	2129680
2824	linoleoyl-docosahexaenoyl-glycerol (18:2/22:6) [2]*	Lipid	Diacylglycerol	54950	LC/MS Pos Late	100010929	2500	682.54					1673182	2.02436e+06	2173263	653612	837141	547204					383602	597850	1493082	2550021	1832164	1.97423e+06	2.04767e+06	2104020	1767858	2307469	3377520	1212932	1538943	1.77287e+06
2811	linoleoyl-linolenoyl-glycerol (18:2/18:3) [1]*	Lipid	Diacylglycerol	54963	LC/MS Pos Late	100010926	2426	632.525					2200635	3.32425e+06	3790068	597394	987244	423428	318738	584789	381107	446128	599645	461856	1826875	2765554	2102432	2827482	3.89397e+06	3051880	1397137	1454063	1460329	1213576	2019006	2270238
2812	linoleoyl-linolenoyl-glycerol (18:2/18:3) [2]*	Lipid	Diacylglycerol	54964	LC/MS Pos Late	100010927	2478	632.525					2364666	3.65482e+06	3801388	1049079	1656285	1075095	900734	949637	777197	951811	1302771	929505	3241560	5547144	3303499	5572675	5197724	4956254	2072211	2002379	2317035	2286143	3.01148e+06	3384525
2809	linoleoyl-linoleoyl-glycerol (18:2/18:2) [1]*	Lipid	Diacylglycerol	54968	LC/MS Pos Late	100010941	2720	634.54					3.9074e+06	4647624	5307634	1.91808e+06	2952582	1908166	1839691	2755257	1772280	2.08656e+06	2358203	2206594	3624269	5723147	4463617	7.69329e+06	9932924	7723866	4357978	3745063	3.94267e+06	3136415	3918318	5016117
2810	linoleoyl-linoleoyl-glycerol (18:2/18:2) [2]*	Lipid	Diacylglycerol	54969	LC/MS Pos Late	100010942	2790	634.54					6964238	8803821	11458742	2967212	4662113	3257775	2351184	3498299	1932117	2004786	2881726	2615241	5190201	8275832	7404635	10859859	11587394	8521362	4661934	5074469	4890571	3449982	5793330	7347282
1804	linoleoylcarnitine (C18:2)*	Lipid	Fatty Acid Metabolism (Acyl Carnitine, Polyunsaturated)	46223	LC/MS Pos Late	100003151	1430	424.342	6450015	36816-10-1		HMDB06469	2173336	2387500	2368977	1468074	1764235	1.85994e+06	1361197	1390884	1155916	1451409	1.74409e+06	1564216	3099948	3875409	2.64747e+06	3475673	3486157	3072715	3292882	2918316	3601278	3.24098e+06	2505543	2928814
1857	linoleoylcholine*	Lipid	Fatty Acid Metabolism (Acyl Choline)	57463	LC/MS Pos Late	100015760	1388	366.337					3461851	478269	3964530	10986626	329169	7625989	5992506	928559	6019291	7630702	682804	13371309	2571173	185906	11648802	4563637	1309499	26094178	5869278	199259	25253034	21586850	4944003	4351647
3346	lithocholate sulfate (1)	Lipid	Secondary Bile Acid Metabolism	62526	LC/MS Neg	100020823	4811	227.12					232114	253454	280764	468114	657666	510583	179995	173944	132475	306688	332085	273544	334013	391806	371220	168012	214549	248792	155000	164026	170890	148650	162167	159386
99	lysine	Amino Acid	Lysine Metabolism	1301	LC/MS Pos Early	407	2850	147.113	5962	56-87-1	C00047	HMDB00182	609761536	525112064	711782592	560187840	484364672	541049344	721011520	579324288	665738816	542832320	464549376	565014144	537282624	599187072	721134528	508034112	538312640	571017216	498419360	441942208	521046752	522973184	440603040	456469760
1381	malate	Energy	TCA Cycle	1303	LC/MS Neg	409	615.6	133.014	525	6915-15-7	C00149	HMDB00156	16623753	45673656	17588586	32348540	98821528	21143642	35781312	65198304	19613292	21131712	54329320	13514813	67789432	119513024	29305760	24995284	66201792	25427118	53577240	79862144	15958236	21800432	60730256	49452128
1594	maleate	Lipid	Fatty Acid, Dicarboxylate	20676	LC/MS Polar	100000707	2640	115.004	444266	110-16-7	C01384	HMDB00176	1079503	1249645	1083255	3469541	1254229	841624	1462527	1.61721e+06	889133	1471450	1388861	815457	1447362	1714895	917009	1187901	1.26961e+06	795082	1499613	1426665	986726	1101210	1094187	1213676
1399	malonate	Lipid	Fatty Acid Synthesis	15872	LC/MS Polar	818	3447	103.004	867	141-82-2;26522-22-85-0	C00383	HMDB00691	6911117	8006540	8811290	10088644	11391808	4235442	21682860	11425802	3661616	8060646	11783191	6924456	18974044	11026116	10657978	10738955	13739290	5.30461e+06	24793532	13753517	6.28752e+06	8488917	8357729	6374507
4444	maltol sulfate	Xenobiotics	Food Component/Plant	48696	LC/MS Neg	100006106	1503	204.981					38380	101048	177217	151097	424936	439513	12024	29733	48841					42367	69248								25259	19544
1232	maltose	Carbohydrate	Glycogen Metabolism	15586	LC/MS Polar	913	3329.4	387.114	10991489	6363-53-7	C00208	HMDB00163	505402	400410	478897	918685	1441020	613596	680763	516689	480612	1163939	837054	421716	557608	688480	588694	666066	753159	321738	415451	464147	210572	784639	1101242	1110889
1284	mannitol/sorbitol	Carbohydrate	Fructose, Mannose and Galactose Metabolism	46142	LC/MS Polar	100001740	2320	181.072	5780		C00794	HMDB00247	3.50062e+06	4110523	4655103	3.50849e+06	4.48632e+06	3.56258e+06	3443907	4.03278e+06	2275422	2.72382e+06	2956642	2.11498e+06	7222796	9858304	7699256	4297344	5023091	3.16932e+06	2678995	2541237	2385964	13265719	14739624	16288132
4745	mannonate*	Xenobiotics	Food Component/Plant	62864	LC/MS Polar	100003695	2736	195.051	3246006	642-99-9			3128088	2844123	3263401	3699905	4218020	3506455	6080672	5421731	3937077	6574123	5909913	6.03145e+06	4735264	7376881	4584654	5716140	6637146	4449121	5.60886e+06	4953211	4730248	3996389	3585530	3882320
1285	mannose	Carbohydrate	Fructose, Mannose and Galactose Metabolism	48153	LC/MS Polar	803	2200	225.062	18950	3458-28-4	C00159	HMDB00169	7435609	5637478	11500553	8192700	6759612	10992979	7821891	5898413	6012676	10669525	8992819	11924692	8.13017e+06	10115910	8555673	9616635	9346091	7845141	12446668	12027917	14553289	8276540	5792760	6063008
1437	margarate (17:0)	Lipid	Long Chain Saturated Fatty Acid	1121	LC/MS Neg	891	5731	269.249	10465	506-12-7		HMDB02259	31216884	27414132	26470484	12625679	14333192	18898070	16706694	17768424	11309922	24021568	32811880	36424580	25255960	34766272	17080180	41724432	35123688	26734892	66152176	44217044	52941628	32400302	34439080	38045816
1781	margaroylcarnitine (C17)*	Lipid	Fatty Acid Metabolism (Acyl Carnitine, Long Chain Saturated)	57512	LC/MS Pos Late	100004054	1424	414.358		106182-29-0		HMDB06210	268185	284938	351682		126588	148023	171032	201385	146972	164021	213464	193570	211845	284605	206416	321212	290830	332564	261775	263675	280609	196083	190100	171164
1504	mead acid (20:3n9)	Lipid	Long Chain Polyunsaturated Fatty Acid (n3 and n6)	35174	LC/MS Neg	100001472	5650	305.249	5312531	20590-32-3		HMDB10378	2990932	2027821	3100845	2232893	1730301	3.10037e+06	1955945	1.26566e+06	1772084	2.06409e+06	2.05544e+06	1948145	2405087	2329195	2150137	3501363	3312115	4478943	4880761	2833535	4625712	3.65168e+06	3334456	3.61697e+06
5943	metabolonic lactone sulfate	Partially Characterized Molecules	Partially Characterized Molecules	63153	LC/MS Neg	100021331	4802	427.216					593170	602356	639846	420594	559429	494995	612101	672138	579467	601291	679577	576544	304888	363207	321411	455153	473286	459046	451752	457273	453822	156957	165772	159394
389	methionine	Amino Acid	Methionine, Cysteine, SAM and Taurine Metabolism	1302	LC/MS Neg	415	1147	148.044	6137	63-68-3	C00073	HMDB00696	16747225	15915507	21049642	20067454	20324156	21562148	24729554	20888504	23713728	17703548	16591501	17911402	21971864	22534484	27831408	20173856	20702658	20459372	19843288	18709216	20213676	19068072	19604932	19826892
394	methionine sulfone	Amino Acid	Methionine, Cysteine, SAM and Taurine Metabolism	44878	LC/MS Pos Early	100004635	1250	182.048	69961	820-10-0			529220	461569	617983	1.00882e+06	967773	987717	907041	688037	773547	913126	840415	899861	662248	711557	658323	1449510	1449924	1348644	1001960	840121	949247	758747	723690	684719
395	methionine sulfoxide	Amino Acid	Methionine, Cysteine, SAM and Taurine Metabolism	18374	LC/MS Pos Early	100000039	1272	166.053	158980	3226-65-1	C02989	HMDB02005	4255763	3345889	6695704	6417739	4360850	5828284	6770239	4580381	8668271	4569470	3087517	4594209	4493581	4330509	5897011	4653539	3435584	4247316	3126416	2881812	4992578	6447425	4943495	5056349
4874	methyl glucopyranoside (alpha + beta)	Xenobiotics	Food Component/Plant	46144	LC/MS Neg	100005864	1070	193.072					305219	300752	299599	251444	281319	283810	86519	74662		109928	87585	67876	253670	286538	244655	960655	968958	739778	340651	314997	378878	712021	731765	725626
4749	methyl indole-3-acetate	Xenobiotics	Food Component/Plant	1584	LC/MS Pos Early	1104	3380	190.086	74706	1912-33-0		HMDB29738	177455	138288	143335	608488	709419	455533	165750	83892	175204	209886	163531	144783		159392	150074	304734	365691	199496	212404		161050	182000	128354	199856
4992	methyl vanillate sulfate	Xenobiotics	Food Component/Plant	63857	LC/MS Neg	100020622	2933	261.007								56772	67633	68991	131936	126412	140117	32146		47210		25748	29529	67054	91512	121363			30617	53550	57909	56699
4369	methyl-4-hydroxybenzoate sulfate	Xenobiotics	Benzoate Metabolism	48429	LC/MS Neg	100006116	2873	230.997					10369659	11579513	12826916	451320	538912	504712	344025	360668	296517	1205824	849620	577652	5074877	6734132	6137091	5411128	6161221	5696044	91519	102592	112384	1360786	1144108	1247274
1697	methylmalonate (MMA)	Lipid	Fatty Acid Metabolism (also BCAA Metabolism)	1496	LC/MS Polar	418	3078.4	117.019	487	516-05-2	C02170	HMDB00202	2211254	2570083	2142422	8267492	8.20847e+06	6262210	2632686	2887462	1837295	4119721	4124430	2145052	3109263	4262024	3023512	4705584	6416277	2428906	4366150	4621306	3358670	3.4603e+06	3300258	4062963
5761	methylnaphthyl sulfate (2)*	Xenobiotics	Chemical	61873	LC/MS Neg	100020006	4163	237.023								104925	141722	131026	16613	21579	25623		20831	25657	26179	30370	35341	38636	42096	43317	32090	34754	30474
4124	methylphosphate	Nucleotide	Purine and Pyrimidine Metabolism	37070	LC/MS Pos Early	100001805	544	113	13130	7023-27-0		HMDB61711	82922	229435	145616	106814	192819	72780	126788	94987	260302	301545	272950	105048	177853	77781	182082	120000	200837	286126	169885	96838	114282	99611	127483	117271
366	methylsuccinate	Amino Acid	Leucine, Isoleucine and Valine Metabolism	15745	LC/MS Polar	2051	2800	131.035	10349	498-21-5		HMDB01844	397039	289477	325214	7.94652e+06	553802	392782	532144	458515	355121	581222	450980	491202	281190	524661	279320	498500	684275	458438	624546	577139	604836	476112	806441	622618
2094	myo-inositol	Lipid	Inositol Metabolism	1124	LC/MS Polar	363	3506.3	225.062	892	87-89-8	C00137	HMDB00211	14984982	15674052	16021753	19117368	23414108	18235176	17726180	19063544	12578759	22336498	26415120	16703984	18611998	22442444	18633068	27855000	34155456	18233508	22427356	21297672	21136070	19100014	17710252	20352132
1432	myristate (14:0)	Lipid	Long Chain Saturated Fatty Acid	1365	LC/MS Neg	519	5440	227.202	11005	544-63-8	C06424	HMDB00806	235825616	175405488	159278544	35563244	54026908	48067488	76192128	120062712	47746404	134750416	252785696	205916480	122782784	284228672	97494416	195671984	233935504	102479352	405571904	317825952	363626368	207514144	325665504	345469728
1451	myristoleate (14:1n5)	Lipid	Long Chain Monounsaturated Fatty Acid	32418	LC/MS Neg	100001198	5346.9	225.186	5281119	544-64-9	C08322	HMDB02000	23328884	13922931	13585411	2665942	3721363	3529413	6467740	8955352	2236806	11965756	21938730	18632532	12081070	23630124	7902270	17865920	20644908	7703177	45357468	31457948	39451484	19177132	26987124	26418500
1797	myristoleoylcarnitine (C14:1)*	Lipid	Fatty Acid Metabolism (Acyl Carnitine, Monounsaturated)	48182	LC/MS Pos Late	100006051	1316	370.295	90659872	889848-55-9			2684651	2073000	3065924	1063249	1211805	1887090	840214	839892	964640	1746973	3254820	2592726	4438117	5186341	4223017	2988817	3961278	3926734	5874167	4177038	5899398	4860945	2690629	2579764
2968	myristoyl dihydrosphingomyelin (d18:0/14:0)*	Lipid	Dihydrosphingomyelins	57365	LC/MS Pos Late	100009038	2060	677.559				HMDB12085	5.39506e+06	5645332	6216360	4330008	6298241	5804169	4883181	5000443	4329137	4642373	5394836	4581569	3465254	4795052	3554937	7.77092e+06	8636403	7.73729e+06	6580794	6.78514e+06	7553671	5248658	5046045	5235234
2777	myristoyl-linoleoyl-glycerol (14:0/18:2) [2]*	Lipid	Diacylglycerol	57408	LC/MS Pos Late	100015684	2720	582.509					530495	605475	614913					653641			243407	127852	488931	1058870	680384	705481	994043	657320		95409			267670	368355
1778	myristoylcarnitine (C14)	Lipid	Fatty Acid Metabolism (Acyl Carnitine, Long Chain Saturated)	33952	LC/MS Pos Late	100001270	1350	372.311	6426854	18822-89-4		HMDB05066	1.69763e+06	1607349	2119102	371113	492002	527828	1072475	1051783	825014	1138105	1.68886e+06	1315439	1858664	2263218	1831736	1634959	1785431	1690173	1957592	1714703	1822994	1.81417e+06	1545242	1457123
131	N,N,N-trimethyl-5-aminovalerate	Amino Acid	Lysine Metabolism	57687	LC/MS Pos Early	100015962	2186	160.133	14274897				60603412	58516824	67191896	54756772	57380480	52830108	66470212	60833592	51779396	28064346	25853564	24805126	51050044	69423040	56979472	52550020	54952648	46645060	70904264	67885160	69642400	53078784	46599440	47470368
471	N,N,N-trimethyl-alanylproline betaine (TMAP)	Amino Acid	Urea cycle; Arginine and Proline Metabolism	62947	LC/MS Pos Early	100020217	2470	229.155					26678162	23666816	27719850	27565888	27266376	22234244	35505584	30929356	27329340	27256880	27324444	27936298	29571864	32600202	26761048	30787540	33745948	27624216	38297328	32608232	36463976	39255476	30269414	30429700
130	N,N-dimethyl-5-aminovalerate	Amino Acid	Lysine Metabolism	62819	LC/MS Pos Early	100020842	2290	146.118					365576	464774	613951	315474			530618	488785	477567	587404	633947	573839	1531989	1629002	1261885	2184584	2413950	1928534	124386		320694	252616		372999
32	N,N-dimethylalanine	Amino Acid	Alanine and Aspartate Metabolism	63151	LC/MS Pos Early	100020371	1370	118.086	5488191	2812-31-9			8522640	7699282	8345711	51807484	49842228	48120688	18862676	17137572	14092450	1765522	1713428	1797267	2347802	3248830	3143183	12055489	12430552	9767646	12643378	12388071	12874260	7241943	6.99578e+06	7162123
4752	N-(2-furoyl)glycine	Xenobiotics	Food Component/Plant	31536	LC/MS Polar	100001086	1230	168.03	21863	5657-19-2;5657-19-2		HMDB00439		159402	230844	411189	913578	542022	248414	292611	345655	209453	290056	233368	96480	185035	185947	69011	135277	142386	54601	56728	107066	88817	263931	262030
72	N-acetyl-1-methylhistidine*	Amino Acid	Histidine Metabolism	43255	LC/MS Pos Early	100004299	2100	212.103	53859791				222279	255761	272487	649581	822567	517167	259999	223687	189558	157585	170852	103764	103016	137274	102247	279208	310931	240879	207749	196712	166010	130665	185545	171547
1679	N-acetyl-2-aminooctanoate*	Lipid	Fatty Acid, Amino	62059	LC/MS Neg	100020204	3943	200.129	95555			HMDB59745	929298	1287777	806241	740916	1424706	768861	695563	1079651	596437	241263	394361	157947	564935	981765	437071	865920	1282774	735283	743568	1121550	669599	640242	904235	988354
71	N-acetyl-3-methylhistidine*	Amino Acid	Histidine Metabolism	43256	LC/MS Neg	100002204	1360	210.088	193270	37841-04-6			49996	44772	52928	34630	28104	25471	59781	61399	45070	29186	37893	38505							80757	79015	47827
53	N-acetyl-aspartyl-glutamate (NAAG)	Amino Acid	Glutamate Metabolism	35665	LC/MS Pos Early	100001612	1035	305.098	5255	3106-85-2	C12270	HMDB01067	121949	151407	171236	225823	244737	173615	143390	119014	97439	135382	135061	95362	99193	119556	62850	86823	113691	59202	124058	152954	70617	208911	147045	174932
4086	N-acetyl-beta-alanine	Nucleotide	Pyrimidine Metabolism, Uracil containing	37432	LC/MS Neg	100002102	773	130.051	76406	3025-95-4	C01073		333192	363500	305179	507122	521468	508271	431833	341455	271126	484380	531116	383163	445969	471816	334906	524152	366121	499923	491206	445680	376120	1017500	793608	723655
128	N-acetyl-cadaverine	Amino Acid	Lysine Metabolism	43530	LC/MS Pos Early	100002249	2385	145.133	189087	32343-73-0		HMDB02284	35764	48465	60695	164286	204155	107517	74639	26786	34189	45468	49187		211766	239923	187219	199409	194479	166724				121692	217539	140684
495	N-acetyl-isoputreanine	Amino Acid	Polyamine Metabolism	62309	LC/MS Pos Early	100020487	2305	203.139	131802901				2980746	2745509	2706164	3180660	3.16928e+06	2846079	2276987	1999401	1586201	2598551	2837079	2800731	2378731	3.09511e+06	2581873	3.96911e+06	4120084	3104847	4266778	3.83005e+06	4303532	6376697	5408217	5432389
30	N-acetylalanine	Amino Acid	Alanine and Aspartate Metabolism	1585	LC/MS Neg	1110	861	130.051	88064	97-69-8	C02847	HMDB00766	2455237	2284746	2436529	3.04742e+06	3341711	2959721	3209263	2776226	2270654	3.0491e+06	3033271	2364313	2823322	3149736	2670507	3073442	2950448	2660361	3327389	3142661	3268806	3192692	2928428	2944970
4607	N-acetylalliin	Xenobiotics	Food Component/Plant	45404	LC/MS Neg	100005367	1410	218.049					48909	48445	46953	778178	951315	874237	39315	30520	21977							104178	116329	84392	158677	161999	190932	85518	79413	83719
452	N-acetylarginine	Amino Acid	Urea cycle; Arginine and Proline Metabolism	33953	LC/MS Pos Early	100001266	2245	217.13	67427	155-84-0	C02562	HMDB04620	2568661	2711305	2643664	3.44047e+06	4089174	3.1349e+06	3415938	3768610	2627008	1577926	2001048	1674378	2054589	2473898	1.75201e+06	2285963	2445824	2067312	2783368	3314369	2.76094e+06	2806821	3062457	2972208
40	N-acetylasparagine	Amino Acid	Alanine and Aspartate Metabolism	33942	LC/MS Pos Early	100001257	785	175.071	99715	4033-40-3		HMDB06028	802835	530030	626322	775763	802416	687374	659818	601966	404107	460876	357194	354753	436130	478283	460890	540703	402584	434577	669149	613473	570117	577736	613762	592268
36	N-acetylaspartate (NAA)	Amino Acid	Alanine and Aspartate Metabolism	22185	LC/MS Polar	100000787	3143	174.041	65065	997-55-7;997-55-7	C01042	HMDB00812	2042014	2406769	2194949	4021885	4875604	4.04337e+06	4127187	3.83374e+06	2786177	2571805	3244983	2079844	3232893	4760217	3585850	3006512	4832568	2434385	3650244	3358409	3338387	3.89435e+06	3641785	3885865
81	N-acetylcarnosine	Amino Acid	Histidine Metabolism	43488	LC/MS Neg	100004046	1235	267.11	9903482	56353-15-2		HMDB12881	2276861	2025418	2576608	2351831	2825443	1052797	1543050	2593093	2541170	1256008	1.01766e+06	2172546	1570312	1492736	3.75436e+06	1506910	3378648	1440074	3448311	2790037	1420085	971864	885339	958432
457	N-acetylcitrulline	Amino Acid	Urea cycle; Arginine and Proline Metabolism	48434	LC/MS Neg	100001577	940	216.099	656979	33965-42-3	C15532	HMDB00856	267569	285302	254259	507404	639452	428522	178897	189790	115439	77191	65271	54502	145445	170172	86363	159238	198769	101050	254337	249428	192685	143866	146226	148019
1363	N-acetylglucosamine/N-acetylgalactosamine	Carbohydrate	Aminosugar Metabolism	46539	LC/MS Pos Early	100006435	715	222.097					1.92879e+06	1656336	2236792	1615109	1714437	1651562	1829586	1680892	1555268	1906285	1991883	1687386	1578894	2081183	1578592	1921077	2294851	1849439	1872684	1764838	1646743	2062285	1966186	2002294
1360	N-acetylglucosaminylasparagine	Carbohydrate	Aminosugar Metabolism	48149	LC/MS Pos Early	1215	1212	336.14	123826	2776-93-4	C04540	HMDB00489		80328	43050	92729	127695	103828	164441	101585	70418	89819	90210	82743	88634	138049	78204	71399	110863		120281	102702	91572	103364	101261	110387
45	N-acetylglutamate	Amino Acid	Glutamate Metabolism	15720	LC/MS Polar	100000282	3106	188.056	70914	5817-08-03	C00624	HMDB01138	423313	540584	424611	752506	1314456	687874	691844	854258	534566	572154	669551	441775	1.03148e+06	1863886	916785	517959	740182	385892	489212	633555	460633	767606	875154	1211830
46	N-acetylglutamine	Amino Acid	Glutamate Metabolism	33943	LC/MS Polar	100001253	2140	187.072	182230	2490-97-3	C02716	HMDB06029	282397	498476	284193	369731	663269	249746	238378	371281	160457	160468	373191	145834	191358	450525	161309	268707	490990	239849	398407	604616	222945	222588	392517	420970
2	N-acetylglycine	Amino Acid	Glycine, Serine and Threonine Metabolism	27710	LC/MS Pos Early	100001006	826	118.05	10972	543-24-8		HMDB00532	4815101	4575512	5190086	4399385	4524890	3697830	4908196	4531807	4058239	4381481	4429771	4476335	3883274	3982759	3553921	4590030	4902069	4299401	7611892	6846852	6.24628e+06	5478039	4725300	4460096
70	N-acetylhistidine	Amino Acid	Histidine Metabolism	33946	LC/MS Neg	100001293	900	196.073	75619	39145-52-3	C02997	HMDB32055	164424	184607	187051	163651	226328	168216	247965	235716	201914	127279	116637	92350	91423	131568	99301	176327	187641	146197	231649	244423	226348	156483	139232	149323
349	N-acetylisoleucine	Amino Acid	Leucine, Isoleucine and Valine Metabolism	33967	LC/MS Neg	100001276	2325	172.098	306109	3077-46-1		HMDB61684	116572	195028	42994.4	81642	201056	198172	219186	210277	128463	183199	247542	30729.1	271238	353296	225153	145674	185835	122944	138895	168936	134503	153834	192583	123777
254	N-acetylkynurenine (2)	Amino Acid	Tryptophan Metabolism	48757	LC/MS Neg	100006378	2378	249.088					44284	70961	35685	160274	290781	125632	97194	125021	73676				43472	66063	19921	43172	80547		11976	21753				31608
301	N-acetylleucine	Amino Acid	Leucine, Isoleucine and Valine Metabolism	1587	LC/MS Pos Early	1082	2656	174.113	70912	1188-21-2	C02710	HMDB11756	524994	626766	674404	618627	903715	652607	630256	913694	686415	443431	526464	610348	640990	1141777	772386	663136	814504	521819	484922	803622	387478	458440	784519	678064
390	N-acetylmethionine	Amino Acid	Methionine, Cysteine, SAM and Taurine Metabolism	1589	LC/MS Neg	1083	1787	190.054	448580	65-82-7	C02712	HMDB11745	650383	799937	570387	988184	1490460	675588	1167882	1192683	627118	1001293	1183676	515769	1063394	1540138	707882	961589	1270871	586131	1108537	1097105	664646	759753	955182	1.01997e+06
1349	N-acetylneuraminate	Carbohydrate	Aminosugar Metabolism	32377	LC/MS Pos Early	1162	660	310.113	439197	131-48-6	C00270	HMDB00230	990817	781068	799504	942727	1051973	792375	1029928	768638	836782	1244943	1077265	718916	797277	1061442	778065	1253637	1379272	1031590	928237	721655	798641	1022429	861719	895195
134	N-acetylphenylalanine	Amino Acid	Phenylalanine Metabolism	33950	LC/MS Neg	100001256	2597	206.082	74839	2018-61-3	C03519	HMDB00512	207298	317177	209924	302954	489391	313895	207590	247614	145505	114837	209330	102801	187871	315212	146329	228566	364671	159867	161267	235964	137336	140919	199748	225769
458	N-acetylproline	Amino Acid	Urea cycle; Arginine and Proline Metabolism	34387	LC/MS Pos Early	100001334	1695	158.081	322640	1074-79-9			1582926	2616766	1764538	2230263	2574353	1595432	1694774	2661951	1337245	1674458	1.98637e+06	1578409	2.02948e+06	2519879	1550195	2020151	2477060	1.88749e+06	954036	1.88891e+06	501824	939876	1.96373e+06	1884380
489	N-acetylputrescine	Amino Acid	Polyamine Metabolism	37496	LC/MS Pos Early	192	2230	131.118	122356	18233-70-0	C02714	HMDB02064	839870	878726	963753	1082011	1321094	1.02296e+06	1061288	920776	792316	1162453	1080102	842078	896830	1150624	869383	1404311	1635443	1267568	1170874	1.01416e+06	981229	948031	914569	916751
10	N-acetylserine	Amino Acid	Glycine, Serine and Threonine Metabolism	37076	LC/MS Polar	100001851	2000	146.046	65249	97-14-3		HMDB02931	5325062	6366378	6181145	6673316	8.07424e+06	6084637	7178546	7033419	4926372	6073738	6900107	5103400	5974488	9202779	5731755	7.79447e+06	9069616	5747601	7353089	7580340	7346553	7.34951e+06	7252609	7.44064e+06
428	N-acetyltaurine	Amino Acid	Methionine, Cysteine, SAM and Taurine Metabolism	48187	LC/MS Neg	100005466	800	166.018	159864				720201	785583	654036	1087561	1391337	1055070	1.02556e+06	804557	564117	1269865	1294455	755715	887711	1183497	643339	1142740	1.0254e+06	893662	995829	1016396	858101	1972015	1852087	1886021
17	N-acetylthreonine	Amino Acid	Glycine, Serine and Threonine Metabolism	33939	LC/MS Neg	100001274	821.6	160.061	152204	17093-74-2		HMDB62557	4.05229e+06	3553892	3769400	4975053	5.19764e+06	5664695	5290323	4760811	4462059	4600281	4356843	3842891	5109046	4708796	4005992	9242731	8616263	7414849	5392501	4587980	6026082	4955276	4422016	4607662
241	N-acetyltryptophan	Amino Acid	Tryptophan Metabolism	33959	LC/MS Neg	100001254	2630	245.093	700653	1218-34-4	C03137	HMDB13713	66448	138563	53418	107871	218205	97787	89472	151888	71188	49972	125819	36382	94755	206721	71532	127544	272992	78632	60935	101761	38657	44777	66552	77041
156	N-acetyltyrosine	Amino Acid	Tyrosine Metabolism	32390	LC/MS Neg	100001104	1680	222.077	68310	537-55-3		HMDB00866	118863	197170	141074	211126	398410	244027	186482	195986	148426	112181	174379	95731	125182	212309	142814	155278	231244	122441	115242	207508	108382	103101	208806	162307
373	N-acetylvaline	Amino Acid	Leucine, Isoleucine and Valine Metabolism	1591	LC/MS Neg	1084	1704	158.082	66789	96-81-1		HMDB11757	212975	261307	203603	269990	396722	254026	269907	335271	186236	268273	349625	199813	228767	454839	243595	285947	353082	235066	276515	375425	261119	246086	303240	268286
461	N-alpha-acetylornithine	Amino Acid	Urea cycle; Arginine and Proline Metabolism	32984	LC/MS Pos Early	100000285	2000	175.108	439232	6205-08-09	C00437	HMDB03357	131095	195739	230921	165110	208414	135598	218339	263473	191848	216175	247058	213497	156828	211934	167646	161702	163105	152113	82065	174863	82497	101864	213940	173121
34	N-carbamoylalanine	Amino Acid	Alanine and Aspartate Metabolism	52340	LC/MS Pos Early	100006369	950	133.061	426409	77340-50-2			201291	157837	178956	303998	316221	262422	191224	198969	175887	123065		165240	164322	203874	178418	192011	104905	176223	194245	163590	216552	217132	208982	247556
375	N-carbamoylvaline	Amino Acid	Leucine, Isoleucine and Valine Metabolism	62852	LC/MS Neg	100020351	1270	159.077	5151292	26081-00-5			18352			28591	38267	45371	64343	44986	36185	27201	34547	22979	43715	57430	43618	46703	46965	35833	50694	52908	55422	32796	31498	42806
460	N-delta-acetylornithine	Amino Acid	Urea cycle; Arginine and Proline Metabolism	43249	LC/MS Neg	100004523	858	173.093	9920500				535102	527971	676030	3642619	4005006	4011580	1803589	1705575	1674773	2625328	2485622	2573287	1247950	1430150	1341707	3192846	3077313	2877274	1605760	1567322	1733659	4828325	4673036	4473308
258	N-formylanthranilic acid	Amino Acid	Tryptophan Metabolism	43549	LC/MS Neg	100004561	2150	164.035	101399	3342-77-6	C05653	HMDB04089	141891	122603	149695	107501	181049	164859	268566	205635	199190	228409	236583	325129	221061	248417	192096	180711	139931	111030	164769	130663	110564	214381	279033	251576
392	N-formylmethionine	Amino Acid	Methionine, Cysteine, SAM and Taurine Metabolism	2829	LC/MS Neg	194	1543.8	176.039	439750	4289-98-9	C03145	HMDB01015	1998072	2043680	1942344	2643278	3216067	1908785	2.78091e+06	2818784	2144647	2095313	2258504	1672276	2346866	2574440	2087444	2184711	2738866	1632865	2423561	2086725	1636779	2089930	2192308	2200773
217	N-formylphenylalanine	Amino Acid	Tyrosine Metabolism	48433	LC/MS Neg	100006056	2360	192.067	759256	13200-85-6			38533	42466	46301	42386.7	58837	44788	41720	40115	42429	29310	32746	31680	70135	101438	89169	40320	57794	35503	59650	51407	26246	43139	37118	28257
1660	N-linoleoylserine*	Lipid	Fatty Acid, Amide	61823	LC/MS Neg	100019958	5492	366.265					64715		94401	80254		109356	84118		155250	92788	36363	53469			116569	52653		151914	47662		100281	128324	74682	85013
2070	N-linoleoyltaurine*	Lipid	Endocannabinoid	61826	LC/MS Neg	100005814	5505	386.237					80136	44175	93455	54048	66973	46283				65875	69712	27300	71956	61634		175241	124573	97444	285017	177688	136523	176866	119703	92896
464	N-methylhydroxyproline	Amino Acid	Urea cycle; Arginine and Proline Metabolism	62068	LC/MS Pos Early	100020215	1145	146.081	9860390				271595	410388	470124	2387090	2594632	2554751		503296		778662	454055	550388	1054109	553732	711267	2435894	2534397	2023194	1.83563e+06	1.53615e+06	1.83922e+06	286997	511695	625931
5068	N-methylpipecolate	Xenobiotics	Bacterial/Fungal	47101	LC/MS Pos Early	100005383	1932	144.102	11286529	41447-17-0			568653		213620	338385	437678	234270		181686				299798	117571	380436	157747		647213		573785	503225	449670	527114	176822	136448
470	N-methylproline	Amino Acid	Urea cycle; Arginine and Proline Metabolism	37431	LC/MS Pos Early	100001956	1335	130.086	557	475-11-6			6.02839e+06	5861636	6759915	113732568	119887368	120024912	4765461	4446364	4155535	31943760	30084896	26849776	53859988	64248692	56282144	178984784	184015216	139713216	62608472	59059056	68519360	12421898	11873753	11790966
427	N-methyltaurine	Amino Acid	Methionine, Cysteine, SAM and Taurine Metabolism	42989	LC/MS Polar	100004056	1650	138.023	7882	107-68-6			216576	212701	251875	290886	275306	357419	134192	80809	58675	272719	255703	167907				250908	166374	172789			28565	51124		56841
473	N-monomethylarginine	Amino Acid	Urea cycle; Arginine and Proline Metabolism	43586	LC/MS Pos Early	100004488	2845	189.135	132862	53308-83-1	C03884	HMDB29416	1.36197e+06	1.21289e+06	1.46232e+06	1.41721e+06	1.29166e+06	1.0693e+06	1.51857e+06	1.44968e+06	1.18816e+06	1.15146e+06	1.25166e+06	1.54241e+06	1.29572e+06	1.26704e+06	1822486	1.498e+06	1.40073e+06	1.70654e+06	950631	1.04244e+06	1320301	2.52177e+06	2.36358e+06	1.56876e+06
2905	N-nervonoyl-sphingadiene (d18:2/24:1)*	Lipid	Ceramides	57442	LC/MS Pos Late	100015699	3858	646.613					7150945	7.84923e+06	7825856	6940959	9912165	6665329	4642158	5111651	3737629	5277398	3656730	5687216	8267402	11074084	8720872	13431536	15256943	7247051	11685032	11599861	9380271	6791409	7336740	7.65476e+06
2089	N-oleoylserine	Lipid	Endocannabinoid	57664	LC/MS Neg	100015641	5600	368.281					175430	172801	260840	247333	181976	198882	145652	92288	188098	173110	174983	173324	199324	154135	241371	236921	253732	224046	384647	269743	276551	245407	190437	223135
2065	N-oleoyltaurine	Lipid	Endocannabinoid	39732	LC/MS Neg	100003119	5610	388.253	6437033	52514-04-2			245061	217316	326281	144510	177649	167257	110510	69242	50101	265883	275261	180016	259486	224160	137696	372450	318525	156705	802072	412099	385634	456089	298041	308477
2914	N-palmitoyl-heptadecasphingosine (d17:1/16:0)*	Lipid	Ceramides	57430	LC/MS Pos Late	100015731	2645	524.504					833665	833092	827244	447360	567233	534806	526563	631935	404230	643292	854825	543562	422027	576344	420664	1.2723e+06	1305850	1101830	924218	933723	790971	358038	340965	426577
2902	N-palmitoyl-sphingadienine (d18:2/16:0)*	Lipid	Ceramides	57416	LC/MS Pos Late	100015609	2490	536.504					1281207	1439488	1309475	1013565	1382214	990715	908684	1041167	722867	981357	1272961	1072863	1562173	1828625	1249180	2362143	2479768	1868092	1770375	1.80298e+06	1684943	1.29795e+06	1289662	1259438
2884	N-palmitoyl-sphinganine (d18:0/16:0)	Lipid	Dihydroceramides	52604	LC/MS Pos Late	100009028	3090	540.535	5283572	5966-29-0		HMDB11760	1.85276e+06	2176688	2467161	900086	1270594	894683	1096604	1190031	1095163	1491469	1883672	1327152	1.71298e+06	2145259	1669654	2403693	2941646	2220823	1219395	1295019	1093744	1588280	2171959	1.94174e+06
2892	N-palmitoyl-sphingosine (d18:1/16:0)	Lipid	Ceramides	44877	LC/MS Pos Late	1518	2893	538.519	5283564	24696-26-2		HMDB04949	9138029	8793482	9068689	6880688	9098837	8451686	8094744	7814400	6390559	7498326	9270429	6929766	9852395	11073814	7867107	16257679	13728393	13333548	9007974	9343399	8962325	8082759	8860515	9083479
1741	N-palmitoylglycine	Lipid	Fatty Acid Metabolism (Acyl Glycine)	42092	LC/MS Neg	100003686	5580	312.254	151008	2441-41-0		HMDB13034	230659	223608	292158	139135	136627	163833	199696	191708	122243	226434	267955	278153	243991	257086	216276	320302	262345	233621	435567	352068	340117	315489	236609	274515
2091	N-palmitoylserine	Lipid	Endocannabinoid	57659	LC/MS Neg	100015640	5557	342.265	6453686	58725-46-5;474943-14-1			481353	468429	698311	538360	439755	484987	565331	498189	603895	450121	423293	574811	416474	359672	637416	537634	545555	446371	674480	516070	428656	651889	473119	510531
2067	N-palmitoyltaurine	Lipid	Endocannabinoid	39835	LC/MS Neg	100003239	5560	362.237		83982-06-3			235518	184729	232731	88848	90954	99023	112315	89368	82505	235565	241280	146556	166451	170168	92753	197658	207618	154216	243706	152985	107737	261416	130788	154101
2885	N-stearoyl-sphinganine (d18:0/18:0)*	Lipid	Dihydroceramides	1759	LC/MS Pos Late	922	3526	568.566	5283573	2304-80-5			1136198	1172059	1245197	141625	198008	283651	456548	501164	298094	556154	959921	738131			261904	1312840	1373403	1201673	452595	398300	249960	215121	236563	313917
2896	N-stearoyl-sphingosine (d18:1/18:0)*	Lipid	Ceramides	54979	LC/MS Pos Late	1547	3392	566.551	5283565	104404-17-3		HMDB04950	4779728	5011524	5097026	2654781	3761890	3020998	2569457	2660470	2155229	4.16663e+06	5349581	4273871	1.8883e+06	2626794	1667625	6623302	6.44276e+06	5241349	3640941	3384523	2994624	1.84018e+06	2223614	1.88514e+06
2090	N-stearoylserine*	Lipid	Endocannabinoid	61822	LC/MS Neg	100019957	5777	370.296					123853	76750	182328	149730	96811	177993	178795	72706	207914	125763	78557	106826	125140	63716	184293	145663	131393	227269	165252	76787	201916	161113	136075	199883
2066	N-stearoyltaurine	Lipid	Endocannabinoid	39730	LC/MS Neg	100003240	5782	390.268	168274	63155-80-6			152997	147588	209724	83317	99103	83452	99509	90686	84347	183873	179700	125125	112125	115010	95475	175738	220269	146231	158843	128003	138759	169336	134150	145120
4164	N1-Methyl-2-pyridone-5-carboxamide	Cofactors and Vitamins	Nicotinate and Nicotinamide Metabolism	40469	LC/MS Pos Early	100001468	1250	153.066	69698	701-44-0	C05842	HMDB04193	3892185	3041773	3951705	3523774	3359121	3062324	5367732	4704304	6572567	4595844	5.57269e+06	6277325	1241973	1464709	1386663	5392825	5739717	5006983	6050241	4805461	5690353	4500215	3260413	4188121
4165	N1-Methyl-4-pyridone-3-carboxamide	Cofactors and Vitamins	Nicotinate and Nicotinamide Metabolism	57584	LC/MS Pos Early	100001469	1260	153.066	440810	769-49-3	C05843	HMDB04194	3476999	2604853	3141712	3624305	3044733	2926728	5838364	4786216	4687489	5195281	3736454	5289509	1133551	1304950	1250915	4798079	4099886	4.046e+06	4965481	3.96027e+06	3784721	4234166	4.04479e+06	3256354
4000	1-methyladenosine	Nucleotide	Purine Metabolism, Adenine containing	15650	LC/MS Pos Early	1242	2120	282.12	27476	15763-06-1	C02494	HMDB03331	2198141	2226988	2421173	2653058	2787458	2.69498e+06	2.43096e+06	2284797	1815663	2896566	2362867	2257299	2184884	2401080	2012450	2417940	2522415	2128452	2445052	2726857	2.65663e+06	2793529	2635316	2673014
3974	N1-methylinosine	Nucleotide	Purine Metabolism, (Hypo)Xanthine/Inosine containing	48351	LC/MS Pos Early	100001409	1430	283.104	65095	20245-33-4		HMDB02721	319274	289313	251145	392410	424922	307154	429146	376547	315845	354350	397326	324199	340456	435083	312304	265915	296617	184762	374713	297272	394637	399128	313379	315477
4039	N2,N2-dimethylguanosine	Nucleotide	Purine Metabolism, Guanine containing	35137	LC/MS Pos Early	100001412	2210	312.13	92919	2140-67-2		HMDB04824	390075	360745	352155	465689	527161	439023	462393	424037	358325	391008	377293	307688	421394	422584	326795	463411	489874	385559	471263	392628	435786	431485	399200	403282
462	N2,N5-diacetylornithine	Amino Acid	Urea cycle; Arginine and Proline Metabolism	43591	LC/MS Neg	100004575	1367	215.104	65977	39825-23-5			41503	39317		338602	418681	309882	48844	49317	50138	61186	62881	40647	22950	36122	20254	87926	109047	65884	115241	119057	106847	258431	210568	228483
104	N2-acetyl,N6,N6-dimethyllysine	Amino Acid	Lysine Metabolism	63254	LC/MS Pos Early	100020545	2172	217.155					1262785	1280184	1308484	762501	805668	587808	899552	887458	651269	66283	74449	41887	961348	1064539	836276	221665	226409	183680	859234	760912	746806	778796	672073	713713
103	N2-acetyl,N6-methyllysine	Amino Acid	Lysine Metabolism	62954	LC/MS Pos Early	100020546	2168	203.139					1355800	1422750	1.39531e+06	571977	675411	522545	1469700	1.55963e+06	1049187	78126	132296	71931	904160	953028	663368	176824	226428	191327	805451	701481	661514	397889	373894	381380
4100	N4-acetylcytidine	Nucleotide	Pyrimidine Metabolism, Cytidine containing	35130	LC/MS Neg	100001413	2040	284.089	107461	3768-18-1		HMDB05923	51316	69967	72478	104283	151172	114819	81016	64976	26140	78305	91149	62233	70819	116628	63607	103575	126811	68351	103306	109120	103320	103101	107610	108237
110	N6,N6,N6-trimethyllysine	Amino Acid	Lysine Metabolism	1498	LC/MS Pos Early	189	2825	189.16	440120	23284-33-5	C03793	HMDB01325	10655568	10333145	13201880	26276484	30055556	27305568	24150246	20483382	19928738	14275617	13579893	14353855	22128392	31039560	26925796	16878592	18305272	16217826	17852210	14799602	19682956	21270640	18622352	16685812
109	N6,N6-dimethyllysine	Amino Acid	Lysine Metabolism	62862	LC/MS Pos Early	100020417	2831	175.144	193344	2259-86-1	C05545	HMDB13287	23340640	21933468	27199668	13982750	14722679	14236360	33941368	29272844	28139224	11876598	11656847	10410258	32060546	38452544	35636600	17808556	19180758	18939180	16038806	13971330	16650860	13985453	13101982	12747374
101	N6-acetyllysine	Amino Acid	Lysine Metabolism	36752	LC/MS Neg	100001734	1059	187.109	92832	692-04-6	C02727	HMDB00206	263696	303264	326141	334691	419713	334001	373955	387278	284561	343926	389330	302791	332925	472899	360299	355510	376093	309462	314760	329618	326336	300661	312579	310274
4011	N6-carbamoylthreonyladenosine	Nucleotide	Purine Metabolism, Adenine containing	35157	LC/MS Neg	100001415	2164	411.127	161466	24719-82-2		HMDB41623	48687	52056	50447	66542	69145	49457	56648	46913	44816	62076	52582	45369	46073	57101	46067	63104	75365	58572	71441	68610	71455	52824	51715	44474
1365	N6-carboxymethyllysine	Carbohydrate	Advanced Glycation End-product	36713	LC/MS Pos Early	100001768	2500	205.118	123800	5746-04-03			387519	534643	558538	458728	459567	331634	500982	397820	361809	229026	278385	271167	426112	507475	391255	492610	555048	493872	302684	310792	279380	254937	235038	226716
108	N6-methyllysine	Amino Acid	Lysine Metabolism	62860	LC/MS Pos Early	100003415	2831	161.129	164795	1188-07-4	C02728	HMDB02038	70607296	61772528	78027184	27532186	26443388	27156400	123514640	104867512	106595880	22821860	21097192	23058732	130500880	148789872	155314528	38428216	37916912	39388016	39722856	35167564	40278968	21954412	19501838	20166872
4021	N6-succinyladenosine	Nucleotide	Purine Metabolism, Adenine containing	48130	LC/MS Neg	100001664	940	382.1	165243	4542-23-8		HMDB00912	52891	44189	43160	50174	53874		49398	38663		38953		30731	32028	51034	48698	64075	44491	26449	64341	43943	37685	34656
1802	nervonoylcarnitine (C24:1)*	Lipid	Fatty Acid Metabolism (Acyl Carnitine, Monounsaturated)	57531	LC/MS Pos Late	100015846	1602	510.452					305405	368188	427801	107346	171708	158893	144520	130948	184462	154412	191646	136962	218621	263760	234748	346683	395490	363609	278094	286974	354816	227061	197046	191852
4144	nicotinamide	Cofactors and Vitamins	Nicotinate and Nicotinamide Metabolism	594	LC/MS Pos Early	432	1942	123.055	936	98-92-0	C00153	HMDB01406	1360986	1033140	875678	970625	1421120	832355	1543683	619981	441146	673196	840309	946992	2779468	2026939	853080	890521	1089341	1148792	4803771	1356182	825177	2.04288e+06	918255	1045627
1490	nisinate (24:6n3)	Lipid	Long Chain Polyunsaturated Fatty Acid (n3 and n6)	57810	LC/MS Neg	100015785	5657	355.264	11792612	68378-49-4		HMDB02007	279510	161303	233801	172485	139651	272497	57148			114957	79940	93304	218128	187537	159384	290074	316225	308646	268399	239576	360226	279994	253164	353619
1441	nonadecanoate (19:0)	Lipid	Long Chain Saturated Fatty Acid	1356	LC/MS Neg	892	6068	297.28	12591	646-30-0	C16535	HMDB00772	2850397	2568720	2828343	1.81137e+06	1.8067e+06	2416023	2140012	2052057	1.58711e+06	2868560	3.41821e+06	3598335	2663251	2712339	2202339	3.57962e+06	2733264	2.92118e+06	5218392	3543440	4373649	3642825	3.28166e+06	3669282
1773	nonanoylcarnitine (C9)	Lipid	Fatty Acid Metabolism (Acyl Carnitine, Medium Chain)	61775	LC/MS Pos Late	100006620	1010	302.233				HMDB13288	264254	156718	220010	48441	108295	91630	93913	118019	131764	85186	217544	181623	172636	215468	205715	154180	181158	205412	201246	144887	334059	281623	174606	165058
4438	norcotinine	Xenobiotics	Tobacco Metabolite	57782	LC/MS Pos Early	100002715	2156	163.087	413	17114-40-8		HMDB01297							169330	157324	137464
4384	o-cresol sulfate	Xenobiotics	Benzoate Metabolism	36845	LC/MS Neg	100001806	2796	187.007	11615528				312685	288962	287435	862538	1357146	840527	943393	1331811	975239	721452	895982	356154	83811	446700	116076	1.54145e+06	2195683	1944721	284725	684897	360724	265553	536554	545697
5681	O-sulfo-L-tyrosine	Xenobiotics	Chemical	45413	LC/MS Neg	100005384	990	260.023	514186				751234	779363	875465	1747531	2.20453e+06	1871151	1495200	1375145	1117924	1188118	1225271	960205	945775	1057432	952077	1474122	1424409	1192108	1134068	1004461	989584	755176	705196	703518
1623	octadecadienedioate (C18:2-DC)*	Lipid	Fatty Acid, Dicarboxylate	61860	LC/MS Neg	100019982	4676	309.207					910838	1188763	1282510	1994767	3308125	5259449	540684	736921	621606	616277	813226	619844	2165906	2648825	3140350	1030389	1496756	1.64726e+06	1437805	1225250	1422502	1505670	1457952	1.51286e+06
1621	octadecanedioate (C18)	Lipid	Fatty Acid, Dicarboxylate	36754	LC/MS Neg	100001615	5043	313.238	70095	871-70-5		HMDB00782	428693	413331	492822	102206	347841	451113	322119	336477	303235	764047	877422	800391	534334	435485	390414	618908	667211	678415	1478111	1163765	1150656	994257	949027	915718
1827	octadecanedioylcarnitine (C18-DC)*	Lipid	Fatty Acid Metabolism (Acyl Carnitine, Dicarboxylate)	61867	LC/MS Pos Late	100005998	1227	458.348		123233-50-1			279600	297109	342108	210669	317063	240762	421155	456105	431698	409988	473696	383787	290164	379824	334383	482862	500648	508380	539720	494931	502966	430411	478457	489010
1622	octadecenedioate (C18:1-DC)	Lipid	Fatty Acid, Dicarboxylate	61861	LC/MS Neg	100019978	4875	311.223					3.97411e+06	4712673	5883824	4374366	7028942	8564027	5574837	6929500	5359963	5298486	6434795	5706404	6356244	7827374	7409164	4556663	5432808	5786118	9125351	8.20043e+06	8419055	9519380	9617511	9983732
1828	octadecenedioylcarnitine (C18:1-DC)*	Lipid	Fatty Acid Metabolism (Acyl Carnitine, Dicarboxylate)	61865	LC/MS Pos Late	100005996	1180	456.332		251981-06-3			312771	346643	438703	225765	307200	316062	288404	343871	268926	260477	294772	249854	308838	399200	336456	451546	468692	409863	509558	433290	472864	608734	588545	587288
1769	octanoylcarnitine (C8)	Lipid	Fatty Acid Metabolism (Acyl Carnitine, Medium Chain)	33936	LC/MS Pos Late	100001247	950	288.217	123701	3671-77-0	C02838	HMDB00791	5445291	3090060	4917776	990158	1487235	2221394	1688485	1959701	2124099	2127415	4077904	3.96483e+06	5958221	6610893	6109611	3448183	4821100	6564938	5895668	4887194	9399116	8481721	4372983	4436876
1458	oleate/vaccenate (18:1)	Lipid	Long Chain Monounsaturated Fatty Acid	52285	LC/MS Neg	100008930	5655	281.249					1649128576	1483534080	1208341632	599518592	881325376	1265725568	562398592	651349696	279876800	1356771456	2140953472	1921399552	1767812096	3449094912	938229824	2936800000	2536362752	1322526208	4780897280	3494664960	4087230976	2236792064	2964511232	3166934784
2052	oleoyl ethanolamide	Lipid	Endocannabinoid	38102	LC/MS Neg	1137	6450	324.291	5283454	11-58-0;111-58-0		HMDB02088	360052	155313	218541	305506	74035	251586	201982		103956	359259	181611	290202	397373	235794	293184	587397	306638	331072	771475	392790	533629	367263	181008	206926
2817	oleoyl-arachidonoyl-glycerol (18:1/20:4) [1]*	Lipid	Diacylglycerol	54960	LC/MS Pos Late	100010936	2907	660.556					5197111	6462680	6688858	2888156	4696171	2982903	1566055	1897728	1602923	2740456	3823957	3164396	5799112	7.50692e+06	5542499	7333988	8834477	5967224	3270916	3.45741e+06	3386836	2047974	2491642	3096601
2818	oleoyl-arachidonoyl-glycerol (18:1/20:4) [2]*	Lipid	Diacylglycerol	54961	LC/MS Pos Late	100010937	2990	660.556					4597167	5326158	6419515	2492866	4271962	2894395	1623756	1902536	1354539	2528039	4268205	2677946	6414716	9497032	5436407	7.33038e+06	8.16748e+06	5893030	3261088	2922232	3253897	2166855	2624520	3.30988e+06
2807	oleoyl-linolenoyl-glycerol (18:1/18:3) [2]*	Lipid	Diacylglycerol	54970	LC/MS Pos Late	100010944	2819	634.54					3011300	3769950	5420122	972674	1740446	1275641	795507	930337	539361	734191	1058206	824379	2850553	4911345	2521313	4570266	3107932	3829174	1627516	1204057	1975411	2123600	2680641	3280394
2804	oleoyl-linoleoyl-glycerol (18:1/18:2) [1]	Lipid	Diacylglycerol	46798	LC/MS Pos Late	100002989	3115	636.556		106292-55-1		HMDB07219	15095611	20078432	20139974	6753389	11728392	8.26004e+06	4928208	7699628	4986365	6.12932e+06	9119940	7285336	12070572	18342314	14801252	20582200	25767414	21775092	11158423	9886145	9855349	8.14146e+06	11547034	13244014
2805	oleoyl-linoleoyl-glycerol (18:1/18:2) [2]	Lipid	Diacylglycerol	46799	LC/MS Pos Late	100002990	3223	636.556		104346-53-4		HMDB07219	20190832	28676884	28670462	9311446	18143058	11639798	7338338	10566449	6533466	8.28041e+06	11795683	10260672	17500538	28430962	20742546	31447556	38739656	30692182	16197752	14360726	14190479	12075641	15511321	20703770
2801	oleoyl-oleoyl-glycerol (18:1/18:1) [1]*	Lipid	Diacylglycerol	54945	LC/MS Pos Late	100010918	3571	638.572					6.37703e+06	8556454	9264805	2.64149e+06	6444889	4928762	2.02853e+06	2879665	1.929e+06	2.8657e+06	3.86906e+06	2.61829e+06	4.07953e+06	5936276	4401394	6.73718e+06	8538068	6976375	3.28422e+06	3.15495e+06	2870668	2.21453e+06	3042432	3.90799e+06
2802	oleoyl-oleoyl-glycerol (18:1/18:1) [2]*	Lipid	Diacylglycerol	54946	LC/MS Pos Late	100010919	3695	638.572					8937313	12422884	12990296	3.58486e+06	9453612	6274478	2135886	3.05529e+06	2138762	2.83948e+06	5106753	3.22186e+06	5.49333e+06	9481079	5.2095e+06	9509686	9425623	9224594	4122880	4602520	3.88419e+06	3044899	4.59891e+06	5.56648e+06
1799	oleoylcarnitine (C18:1)	Lipid	Fatty Acid Metabolism (Acyl Carnitine, Monounsaturated)	35160	LC/MS Pos Late	100001501	1423	426.358	6441392	38677-66-6		HMDB05065	6.97519e+06	6269337	8067513	4228749	5400215	6080544	3553929	3307119	2984496	5050558	5533848	4971988	8195524	9605441	6883873	9482256	8097939	7882364	9038063	7.51293e+06	9357893	8197725	6140112	6011158
1853	oleoylcholine	Lipid	Fatty Acid Metabolism (Acyl Choline)	53260	LC/MS Pos Late	100009331	1449	368.352					2146664	284688	2.84559e+06	6530611	221833	4580173	3.57296e+06	503185	3610837	3352191	300924	5901305	1520683	78997	6448687	2525463	629408	13252833	3654344	115128	15164874	11768648	2578140	2392481
440	ornithine	Amino Acid	Urea cycle; Arginine and Proline Metabolism	1493	LC/MS Pos Early	444	2800	133.097	6262	3184-13-2	C00077	HMDB03374	185727840	155428672	234595904	201701792	167186208	217005280	240644048	180798352	218074160	233432704	162531248	212371680	157801856	179959280	216232736	190438560	164595936	184479280	184785584	167197664	213359360	182204016	165141280	162136336
4053	orotate	Nucleotide	Pyrimidine Metabolism, Orotate containing	1505	LC/MS Polar	445	1638.1	155.01	967	50887-69-9	C00295	HMDB00226	1220504	806642	1303401	882549	808072	882040	1760361	1609146	1.33676e+06	1207988	1086372	938582	2.56703e+06	3024976	2428478	1152675	1264186	1137061	1142158	1143213	1773366	1669377	1.37701e+06	1552015
4055	orotidine	Nucleotide	Pyrimidine Metabolism, Orotate containing	35172	LC/MS Polar	100001416	2250	287.052	92751	314-50-1		HMDB00788	384577	402735	428153	906091	946400	772865	1115404	997716	737045	945849	677509	610914	933375	1489138	936305	1078038	1.04537e+06	778351	816451	773408	888789	984950	799117	1.01632e+06
4193	oxalate (ethanedioate)	Cofactors and Vitamins	Ascorbate and Aldarate Metabolism	20694	LC/MS Neg	100000841	603	88.988	971	144-62-7	C00209	HMDB02329	37858680	27967656	40088508	41546584	34616304	44842800	27410940	20174824	24511802	36981168	30122534	36263216	41666564	32394526	44664100	47743804	40964376	45395044	55484972	33275618	60491656	75474128	59568660	58617396
215	p-cresol glucuronide*	Amino Acid	Tyrosine Metabolism	48841	LC/MS Neg	100006191	2420	283.082	154035	17680-99-8		HMDB11686	54917	68632	71836	924769	1297555	1131584	813980	832674	484958	440623	635499	589491	68747	109513	74897	146134	199145	118004	634171	601476	754518	496972	539948	532384
4377	p-cresol sulfate	Xenobiotics	Benzoate Metabolism	36103	LC/MS Neg	100001315	2890	187.007	4615423	3233-57-7		HMDB11635	152403904	165730912	168135488	564226176	657028800	585837312	403677504	380621216	327449248	471494432	512098208	430839424	187481904	207629552	193240912	250682016	278081056	270628160	413163744	440719104	446984928	362371456	366125504	363939968
1435	palmitate (16:0)	Lipid	Long Chain Saturated Fatty Acid	1336	LC/MS Neg	424	5618	255.233	985	57-10-3	C00249	HMDB00220	1714219520	1478546432	1420127232	572905536	672799552	813457856	756230784	863034880	552769728	1166624512	1711643008	1699735936	1335996032	2351699968	964602688	2042868608	1936638464	1313090560	3220791296	2387421952	2804193536	1819895936	2226636544	2380211200
1454	palmitoleate (16:1n7)	Lipid	Long Chain Monounsaturated Fatty Acid	33447	LC/MS Neg	452	5475	253.217	445638	373-49-9	C08362	HMDB03229	116755816	92467728	62057204	20928156	30289990	27081576	28353508	38084864	14264540	52966468	111535592	71658192	66241824	197184704	34341304	171254256	173258144	56592376	471932032	332134176	386076672	120841400	194162976	204464624
2789	palmitoleoyl-linoleoyl-glycerol (16:1/18:2) [1]*	Lipid	Diacylglycerol	54967	LC/MS Pos Late	100010930	2664	608.525					579388	830631	807708				176809	207189	71387	111758	271695	181698	456458	846378	417871	1085348	1389285	849894	289737	402608	257964	135185	189744	370128
2787	palmitoleoyl-oleoyl-glycerol (16:1/18:1) [1]*	Lipid	Diacylglycerol	52632	LC/MS Pos Late	100009053	3035	610.54	9543694			HMDB07131	459206	354415	614841		94970.7	97578	60253.5	130218	72916.7	65410	131017	92854.1	105166	365281	174632	251308	588066	238463	185858	57382.9	85450	61097.2	98123.1	142171
2788	palmitoleoyl-oleoyl-glycerol (16:1/18:1) [2]*	Lipid	Diacylglycerol	52631	LC/MS Pos Late	100009054	3154	610.54					567126	329228	991453	96213.7	315674	88765	226633	250409	221362	157129	209162	200548	333888	650505	472566	960568	1.00686e+06	648015	184239	286327	178611	147465	216464	258995
1798	palmitoleoylcarnitine (C16:1)*	Lipid	Fatty Acid Metabolism (Acyl Carnitine, Monounsaturated)	53223	LC/MS Pos Late	100009406	1357	398.327	71464547				993225	889489	1138864	371771	483617	662496	479698	456705	460567	702228	1041208	772167	1540823	1638819	1106005	1468918	1375118	1129960	1995546	1460636	1910202	1349359	926718	818042
1854	palmitoloelycholine	Lipid	Fatty Acid Metabolism (Acyl Choline)	53257	LC/MS Pos Late	100009334	1385	340.321					67896		72517	242798		159210	129163		133985	87459		212184			206393	96753		551009	137086		568805	389242	51924	67676
2969	palmitoyl dihydrosphingomyelin (d18:0/16:0)*	Lipid	Dihydrosphingomyelins	52434	LC/MS Pos Late	100008954	2290	705.591	9939965				57541208	60015420	63843532	49266204	68231552	58985036	52948128	54768504	44326028	60469344	73879224	64230272	67291968	93576816	64720492	97448320	104849672	94031360	82491424	84152352	91395424	90381832	85444272	84657352
2973	palmitoyl sphingomyelin (d18:1/16:0)	Lipid	Sphingomyelins	37506	LC/MS Pos Late	100002107	2168	703.575	9939941	6254-89-3			762445504	776667648	806436800	732077632	831312896	748012736	790276928	782749696	738867008	772513792	848947520	787799040	924969344	1013433856	949730368	1007395264	1033067008	990281984	922365824	953280768	982764544	920277120	907888064	897458176
2791	palmitoyl-arachidonoyl-glycerol (16:0/20:4) [1]*	Lipid	Diacylglycerol	54957	LC/MS Pos Late	100010924	2916	634.54					1225337	1353990	1488946	416296	413567	458458	779642	740260	552324	778273	1109562	1017780	841249	1355668	1036512	1185903	1256351	1077659	745820	355213	582698	583451	558793	682656
2792	palmitoyl-arachidonoyl-glycerol (16:0/20:4) [2]*	Lipid	Diacylglycerol	54958	LC/MS Pos Late	100010925	3015	634.54					1.41618e+06	1225106	1441186	563124	457481	454036	458867	641634	534579	640122	1225178	840283	1148288	2682337	1879244	1.87084e+06	2026831	1074469	455757	309862	690217	440790	678837
2794	palmitoyl-docosahexaenoyl-glycerol (16:0/22:6) [1]*	Lipid	Diacylglycerol	57373	LC/MS Pos Late	100015618	2749	658.54					928753	965503	1647247	173133	125826	159646				254142	232162	159300	516985	1435520	1427489	973013	726824	685732	561980	547648	1227253	535135	556288	543207
2786	palmitoyl-linolenoyl-glycerol (16:0/18:3) [2]*	Lipid	Diacylglycerol	54965	LC/MS Pos Late	100010939	2834	608.525					379417	580060	991833					124592					477436	927170	516000	902137	479487	516775					260083	414063
2784	palmitoyl-linoleoyl-glycerol (16:0/18:2) [1]*	Lipid	Diacylglycerol	52633	LC/MS Pos Late	100009052	3080	610.54	9543695			HMDB07103	2.48133e+06	2208511	2.73758e+06	549447	954106	388557	749753	1.5245e+06	1.0075e+06	864754	1.61492e+06	1.03509e+06	1.37396e+06	2.65505e+06	2.50409e+06	1796430	3.80146e+06	2.04017e+06	1.04202e+06	1.08978e+06	1.01446e+06	839636	1.30645e+06	1650718
2785	palmitoyl-linoleoyl-glycerol (16:0/18:2) [2]*	Lipid	Diacylglycerol	52634	LC/MS Pos Late	100009055	3197	610.54					3.62228e+06	4324590	4929255	1.1272e+06	1572414	966587	1.84719e+06	3115590	1588855	1.45851e+06	2.1903e+06	1.67248e+06	2782666	4.54081e+06	4.17184e+06	4469342	6.66291e+06	5.02287e+06	1.82313e+06	1446019	1.75113e+06	1.56324e+06	1.92193e+06	2759735
2782	palmitoyl-oleoyl-glycerol (16:0/18:1) [1]*	Lipid	Diacylglycerol	54943	LC/MS Pos Late	100010916	3562	612.556					581225	812456	992125		198729			187954	194390		227813		267899	599665	532801	544806	878757	316111
2783	palmitoyl-oleoyl-glycerol (16:0/18:1) [2]*	Lipid	Diacylglycerol	54942	LC/MS Pos Late	100010917	3695	612.556					1212496	1.76281e+06	1529039		401653		255184	602930	319624	230292	633501	347110	310073	1544254	1071211	1187104	1470181	1075568	217467	190505		286051	316185	406423
3004	palmitoyl-sphingosine-phosphoethanolamine (d18:1/16:0)	Lipid	Ceramide PEs	62984	LC/MS Pos Late	100021162	2207	661.528					1299267	1399117	1198670	1391904	1408558	1606093	1571598	1458745	1362065	1387066	1560766	1199213	1817240	2376315	1927292	2.03342e+06	1.87038e+06	2103292	1.80348e+06	1778150	2065207	2123134	1961413	1981659
1780	palmitoylcarnitine (C16)	Lipid	Fatty Acid Metabolism (Acyl Carnitine, Long Chain Saturated)	44681	LC/MS Pos Late	100000776	1425	400.342	461	6865-14-1	C02990	HMDB00222	5.98996e+06	6006848	7735633	2309652	3.03658e+06	3087966	3.98346e+06	3828180	3584511	3851987	4584102	4177895	6374368	7.58473e+06	6388480	6471319	6379004	6436078	5202428	5005055	5830175	5931292	4998933	4714413
1852	palmitoylcholine	Lipid	Fatty Acid Metabolism (Acyl Choline)	52944	LC/MS Pos Late	100009233	1482	342.337	151731				4062940	583058	4885557	9371638	342291	6588167	5009781	819060	5365798	6582704	614651	11730681	2.85962e+06	173819	11728991	4394456	1236231	23870564	6653829	228175	26139264	21486500	4393006	4180477
4173	pantoate	Cofactors and Vitamins	Pantothenate and CoA Metabolism	63061	LC/MS Neg	100002613	1143	147.066	439251	470-29-1	C00522		68138	64020	82716	86531	105402	79559	72923	110807	90475	63048	67927	67246	756699	660251	540732	84665	111858	83954	78869	68110	57144	72605	83603	73370
4174	pantothenate (Vitamin B5)	Cofactors and Vitamins	Pantothenate and CoA Metabolism	1508	LC/MS Neg	1024	1498.7	218.103	6613	137-08-6	C00864	HMDB00210	7048272	9745227	6.11593e+06	10883875	19217784	10132118	6966612	9232829	4308506	8924429	15222377	6297493	11268344	16513870	6524916	12381996	17736170	9988925	10843074	18200928	8.04022e+06	12705062	17829896	18950152
4410	paraxanthine	Xenobiotics	Xanthine Metabolism	18254	LC/MS Neg	100000453	2279	179.058	4687	611-59-6	C13747	HMDB01860	536999	479960	699472	3063445	3529873	3.73548e+06	1681465	1508007	1500193	1394826	1.6029e+06	1.62467e+06	626550	677508	853867	615966	592861	492575	2612991	2424470	3040214	2058172	1880911	2.00703e+06
1419	pelargonate (9:0)	Lipid	Medium Chain Fatty Acid	12035	LC/MS Neg	437	4798	157.123	8158	112-05-0	C01601	HMDB00847	2287384	3052401	2505559	1406209	1776031	1647337	1957273	2.0176e+06	1958754	2302278	2464896	3056822	1833102	1867095	1808119	1746208	1904766	2.08513e+06	1973770	2013670	1936242	2361971	2193993	2128637
1434	pentadecanoate (15:0)	Lipid	Long Chain Saturated Fatty Acid	1361	LC/MS Neg	980	5521	241.217	13849	1002-84-2;10002-84-2	C16537	HMDB00826	45666496	40451472	41259992	22588742	24866792	26283868	27665120	32843304	23517158	33567392	50014972	44262256	31090968	46253152	27538656	43020736	48441136	32102412	68329512	57329280	62811080	40215584	51539736	54069056
5944	pentose acid*	Partially Characterized Molecules	Partially Characterized Molecules	63264	LC/MS Polar	100021467	2180	165.041					1276646	1310378	1637591	1311470	1.60364e+06	1466167	1247064	922014	978014	7.44285e+06	5057566	4807987	1084019	1155817	921077	2312908	2292818	1600413	1137323	1285201	1380790	1.66705e+06	1286705	1.76476e+06
5776	perfluorooctanesulfonate (PFOS)	Xenobiotics	Chemical	57564	LC/MS Neg	100010955	5233	498.93	74483	1763-23-1	C18142	HMDB59586	2752605	2726445	2787079	2146307	2490074	2414159	1462760	1498795	1265316	2189980	2396051	2052492	4076887	4441568	4104117	1848805	2040191	1658513	1825794	1754582	1819794	1368669	1228900	1356439
5823	perfluorooctanoate (PFOA)	Xenobiotics	Chemical	62071	LC/MS Polar	100020208	685	412.966	9554			HMDB59587	444198	440568	473529	402379	433049	383898	288139	292319	247032	362222	347129	298579	573302	614825	574484	399840	425512	380664	147387	157836	200027	495718	447816	485806
181	phenol glucuronide	Amino Acid	Tyrosine Metabolism	52747	LC/MS Neg	100006679	1800	269.067	87235	17685-05-1		HMDB60014				42377	48862	34107	21520	27466						17259		49546	56721	29397				27922	28781	32607
180	phenol sulfate	Amino Acid	Tyrosine Metabolism	32553	LC/MS Neg	100001510	2156	172.991	74426	937-34-8	C02180	HMDB60015	64622432	62406444	60290196	89113264	97296752	83305752	67339264	66622152	55736480	54742300	59492320	49002736	65597236	67017984	58219732	95941960	94834720	86007872	43871560	42429596	44719240	84004864	88922688	86165224
148	phenylacetate	Amino Acid	Phenylalanine Metabolism	57745	LC/MS Neg	100000011	2150	91.0554	999	103-82-2	C07086	HMDB00209	51846	41863	49224	107332	110304	186462	127304	80038	80385	126034	112601	167167	44533	48160	58036	43675	45231	44748	116785	96909	156001	187549	149578	148234
1121	phenylacetylcarnitine	Peptide	Acetylated Peptides	48425	LC/MS Pos Early	100006108	3092	280.154	101724840	287108-21-8			287986	349624	373480	890566	1483617	1343592	517571	631403	378810	772409	1002238	1136292	118166	331015	228907	329274	354362	227405	463580	769983	486810	775136	948479	896232
1123	phenylacetylglutamate	Peptide	Acetylated Peptides	52925	LC/MS Neg	100009045	1570	264.088	11579826			HMDB59772	32480	42872	30323	94851	151366	95146	65682	76978	37265	61236	91483	42002	50104	66283	39700	31937	61028	38592	146564	160725	115339	73654	74371	75600
1124	phenylacetylglutamine	Peptide	Acetylated Peptides	35126	LC/MS Neg	100001417	2330	263.104	92258	28047-15-6	C04148	HMDB06344	12291633	15280128	15170656	35081992	56543844	36181964	25917346	32172768	20161892	23390244	35074632	29486346	12504363	17106596	15872792	12410561	17552738	12623084	28352320	28934888	24404278	28883008	31900512	33210798
1127	phenylacetylglycine	Peptide	Acetylated Peptides	33945	LC/MS Neg	100001275	2375	192.067	68144	500-98-1	C05598	HMDB00821	59844	92963	142096	7375.4	53500	41266	167613	235887	199193	159006	225281	150119	142454	256347	187093	124702	197076	172103	58733	83149	117921	77857	129422	150161
133	phenylalanine	Amino Acid	Phenylalanine Metabolism	64	LC/MS Pos Early	460	2878	166.086	6140	63-91-2	C00079	HMDB00159	590740480	530702272	684210880	744604800	725046336	809486528	761179648	621977152	677587328	703997952	646839296	674760000	632983936	727657472	774332672	700884224	721989376	685238400	612547840	556803264	628175552	747177536	704107904	714977152
144	phenyllactate (PLA)	Amino Acid	Phenylalanine Metabolism	22130	LC/MS Neg	100000774	2208	165.056	3848	828-01-3	C05607	HMDB00779	1.61284e+06	1630247	1864344	1817190	1628719	1046731	2000402	1.70928e+06	1515180	1476148	1221882	883594	1599201	1587462	1493231	1900240	1690330	1415821	1561838	1202734	1269723	1709843	1658833	1.66741e+06
143	phenylpyruvate	Amino Acid	Phenylalanine Metabolism	566	LC/MS Neg	241	2515	163.04	997	156-06-9	C00166	HMDB00205	118449	156407	171937	174105	265961	138028	228292	239684	128108	134910	220092	145237	169235	211899	148915	268497	271763	148174	147421	165317	97312	165737	245379	179524
1396	phosphate	Energy	Oxidative Phosphorylation	42109	LC/MS Pos Early	461	576	98.9842	1061	7664-38-2	C00009	HMDB01429	7994504	25662890	6.90081e+06	8918556	28404552	12696401	9959300	29566974	17569816	8692827	32143366	8209998	8930672	18982218	9738429	10945239	30939286	10893187	11744302	31540708	10338253	8598969	22026804	19321504
2129	phosphoethanolamine (PE)	Lipid	Phospholipid Metabolism	1600	LC/MS Pos Early	1026	700	142.026	1015	1071-23-4	C00346	HMDB00224	1020146	1067995	656573	381384	1480144	860892	1233034	1644353	1268176	954400	1372961	487544	370548	1157488	872740	930956	1384497	638088	1293245	1321972	1067334	855634	1400889	1287304
4784	phytanate	Xenobiotics	Food Component/Plant	598	LC/MS Neg	466	5908	311.296	26840	14721-66-5	C01607	HMDB00801	8093524	7931184	9947564	2275395	3300732	3134007	5454754	5126520	3012990	11322666	10229466	9114053	4725592	3406912	2592929	7223844	7.38888e+06	5244133	9114471	6889034	5388161	10927790	7700193	8515362
266	picolinate	Amino Acid	Tryptophan Metabolism	1512	LC/MS Pos Early	1022	910	124.039	1018	98-98-6	C10164	HMDB02243	987380	314428	440207	391672	402008	369893	1.00709e+06	917880	923076	584485	927646	856747	832758	943720	715156	624936	435985	317367	543144	340587	392016	639957	649179	568198
1755	picolinoylglycine	Lipid	Fatty Acid Metabolism (Acyl Glycine)	63057	LC/MS Neg	100021198	1867	179.046	11788622	5616-29-5		HMDB59766	110449	147159	138352	161222	276518	163943	332231	317565	236971	206733	210217	151748	285287	300047	193460	190967	167093	132853	114444	119992	101787	121676	165207	171570
1824	pimeloylcarnitine/3-methyladipoylcarnitine (C7-DC)	Lipid	Fatty Acid Metabolism (Acyl Carnitine, Dicarboxylate)	53224	LC/MS Pos Early	100009407	2773	304.175					192985	196420	214805	145033	135830	121127	388149	308284	278902	369120	368151	310720	167155	240653	125050	203535	203183	178189	941094	821407	661736	197444	254759	156966
124	pipecolate	Amino Acid	Lysine Metabolism	1444	LC/MS Pos Early	1025	2200	130.086	849	4043-87-2	C00408	HMDB00070	34368648	29042624	38071264	35739476	31765294	33744680	24200198	19668766	21325076	41461372	34856704	37458832	57830464	55606204	55145424	32603544	27915032	31928484	24536848	20319692	24356708	39233256	36680188	36307400
4790	piperine	Xenobiotics	Food Component/Plant	33935	LC/MS Pos Late	100001267	1168	286.144	638024	94-62-2	C03882	HMDB29377	23781236	23541518	28446960	48024412	53251256	58707384	21631168	22133474	25296268	10185045	8915592	9206344	3465057	5.34664e+06	5.62455e+06	17919088	22069804	24410616	13245066	13977244	21620930	11848743	11950350	13281228
3152	pregnanediol-3-glucuronide	Lipid	Progestin Steroids	40708	LC/MS Neg	100003470	5145	495.296	123796	1852-49-9		HMDB10318	129419	119936	123071	570515	740890	828974	95353	73168	91936	226237	230619	198084	458880	528893	520127	66923	81971	68955	448095	338548	320352	190407	201618	192487
3157	pregnanolone/allopregnanolone sulfate	Lipid	Progestin Steroids	48394	LC/MS Neg	100006173	5160	397.205								113393	101543	121900	59389	65851	63973	46524	20041	29895	99051	94408	118837	40610	39628	49768	152478	105132	99738			50653
3129	pregnen-diol disulfate*	Lipid	Pregnenolone Steroids	32562	LC/MS Neg	100001993	3868	238.077					8807704	8845175	9177467	11462696	13376792	11383775	10621937	11386633	9501192	9789648	10520149	8902853	17077280	19443264	17250576	9352725	9811776	8980772	23648936	23785212	23618242	11265548	11224879	11473858
3128	pregnenediol sulfate (C21H34O5S)*	Lipid	Pregnenolone Steroids	32619	LC/MS Neg	100002067	5000	397.205		1247-64-9			1.77939e+06	1636409	1747277	6480403	6.31759e+06	5366549	4659075	4364609	3480473	6120545	5737617	4887846	8574075	8524315	6635219	5169842	4538065	3476398	16006411	12464410	11263806	7892532	8214369	8.18086e+06
3131	pregnenetriol disulfate*	Lipid	Pregnenolone Steroids	62921	LC/MS Neg	100021104	3504	246.075					4073629	3955600	4.12449e+06	4729242	5294699	4302004	2746476	3005932	2540002	4299970	4437798	3807294	4417862	4791554	4125139	3727942	3953449	3447837	5660655	5077687	4760577	3468040	3573854	3775878
3130	pregnenetriol sulfate*	Lipid	Pregnenolone Steroids	62922	LC/MS Neg	100021103	4749	413.2					2115391	1777712	1976136	4357714	4.02808e+06	3550363	2158753	1930769	1584616	4481693	3940439	3446841	5097201	4434770	3403650	3844604	3025284	2568569	7192654	4656502	4181524	4697076	4625247	4663953
3112	pregnenolone sulfate	Lipid	Pregnenolone Steroids	38170	LC/MS Neg	100002129	5100	395.19	105074	1247-64-9		HMDB00774	364820	437532	357566	1433687	1.90362e+06	1109360	1342908	1.5115e+06	1.04367e+06	1129926	1.43441e+06	802015	2694973	2943069	1870170	1053431	1737278	811901	6941312	4761768	2481254	1371472	1.71167e+06	1682816
1575	pristanate	Lipid	Fatty Acid, Branched	38271	LC/MS Neg	477	5773	297.28	123929	1189-37-3		HMDB00795	495613	499450	531772	67423	159166	164702	231182	274637	148398	481323	580712	641300	228412	218052	166037	377394	509735	466911	464160	310066	620136	669041	543302	621088
467	prolylhydroxyproline	Amino Acid	Urea cycle; Arginine and Proline Metabolism	35127	LC/MS Pos Early	100001167	2128	229.118	11673055	18684-24-7		HMDB06695	6921735	5395250	5836033	11395432	11977949	9953388	11124924	11140283	10981585	8460618	8434561	6.97405e+06	4.19169e+06	4755328	4894841	7450697	6.9918e+06	6562991	6689330	5743633	6765832	7.22325e+06	6666516	6593108
448	proline	Amino Acid	Urea cycle; Arginine and Proline Metabolism	1898	LC/MS Pos Early	480	1603	116.071	145742	147-85-3	C00148	HMDB00162	1508391552	1428908800	1716751104	1726371584	1533960448	1597847424	1724486272	1298995584	1369501184	1395222144	1175038976	1250062080	1717926272	1748706176	1768172416	1470200960	1306390016	1344782336	1179865728	999087488	1104448384	1516327552	1500489728	1538275328
892	prolylglycine	Peptide	Dipeptide	40703	LC/MS Pos Early	100003674	2136	173.092	6426709	2578-57-6		HMDB11178	381772	438442	634459	947249	842077	979483	1031528	766515	1195857	896816	553482	866287	1405653	1219610	1245116	1131818	1054986	1089611	569214	523408	831688	409525	821775	710555
1694	propionylcarnitine (C3)	Lipid	Fatty Acid Metabolism (also BCAA Metabolism)	32452	LC/MS Pos Early	100001162	2590	218.139	107738	17298-37-2	C03017	HMDB00824	19897526	23679270	20480560	26844796	34592184	23793594	26637348	29815066	20562916	22260416	30606658	22773592	17759124	30535778	18932536	28691082	55144192	21296384	17245028	21328952	15359696	23747042	27640314	28878958
1695	propionylglycine (C3)	Lipid	Fatty Acid Metabolism (also BCAA Metabolism)	31932	LC/MS Neg	100001150	960	130.051	98681	21709-90-0		HMDB00783	174594	194342	158229	270517	312793	289752	402701	328386	216163	371956	398690	263077	248779	321834	287709	305796	528475	227316	210729	214722	209636	326894	335878	358413
4371	propyl 4-hydroxybenzoate sulfate	Xenobiotics	Benzoate Metabolism	48460	LC/MS Neg	100006264	3971	259.028		162338-10-5			32538	28876	36318							189889	91511	58834	128829	176655	202326	879545	851622	765892
4067	pseudouridine	Nucleotide	Pyrimidine Metabolism, Uracil containing	33442	LC/MS Neg	821	1100	243.062	15047	1445-07-4	C02067	HMDB00767	5029166	4666335	5610807	6.08577e+06	6929731	6.15892e+06	5889158	6142639	5281796	5797575	5645094	5187937	5127228	5907205	6022016	6.10787e+06	6.61672e+06	5613560	6796083	6.503e+06	6742819	6530079	6144759	6001955
4287	pyridoxate	Cofactors and Vitamins	Vitamin B6 Metabolism	31555	LC/MS Neg	100001121	2185	182.046	6723	82-82-6	C00847	HMDB00017	2947236	3844510	2842117	3.4935e+06	5502104	3561114	3244805	3.98337e+06	2595426	3163670	4708267	2581656	1.98098e+06	2917983	1.93356e+06	3487235	5677565	3100434	3294993	3953560	4492038	3.52705e+06	4621931	4354115
52	pyroglutamine*	Amino Acid	Glutamate Metabolism	46225	LC/MS Pos Early	100001540	1900	129.066	134508	2353-44-8			90935464	90286432	92597976	108972304	107881048	106182904	218117168	220222704	190457760	52604752	51728284	47234592	125182872	141304016	129987360	87017744	95394240	84203720	197591024	197148992	195030144	120528392	120410360	125247304
4899	pyrraline	Xenobiotics	Food Component/Plant	48428	LC/MS Pos Early	100001767	2750	255.134	122228	74509-14-1		HMDB33143	127406	187706	276685	327140	325162	285144	182727	235905	192557	126798	166070	114058	196550	344358	326964	124266	148163	144677	76359	77234	99539	376688	460706	450314
1175	pyruvate	Carbohydrate	Glycolysis, Gluconeogenesis, and Pyruvate Metabolism	48990	LC/MS Polar	823	1083	87.0088	1060	127-17-3	C00022	HMDB00243	8999964	40480224	9645346	11663340	48300692	11632894	10502297	34569216	4652984	16242868	49960208	12280889	16631109	68310256	13854581	22425112	49116824	15062228	16537323	78319056	6070864	4319835	33932284	36553560
4693	quinate	Xenobiotics	Food Component/Plant	18335	LC/MS Polar	100000442	2432.9	191.056	6508	77-95-2	C00296	HMDB03072	7220364	7570561	9024371	2834903	3093281	2935859	14604055	13814981	11204152	43592400	41545680	39671544	112348			6595863	7.24633e+06	5644659	21885316	21536504	21977232	36275696	34329992	35690772
4140	quinolinate	Cofactors and Vitamins	Nicotinate and Nicotinamide Metabolism	1899	LC/MS Pos Early	182	845	168.029	1066	89-00-9	C03722	HMDB00232	369803	329976	433250	442999	475462	466455	498146	448544	409796	453946	581968	471652	450988	467626	323767	516397	528897	426575	582099	511739	511168	570038	512551	486005
4273	retinal	Cofactors and Vitamins	Vitamin A Metabolism	40807	LC/MS Pos Late	100004088	1666	285.221	638015		C00376	HMDB01358	72276	48058	33125.5	50787	54307	20838.6	52180	20349.1	25139.5	28124.1	29155.2	48962	16639.7	79578	30344.1	80310	57698.1	23775	50269	29019.8	30821.4	23045.8	25630.9	25981.4
4265	retinol (Vitamin A)	Cofactors and Vitamins	Vitamin A Metabolism	1806	LC/MS Pos Late	498	1636	269.226	445354	68-26-8	C00473	HMDB00305	14913285	15765833	15413467	11047686	16420998	13567126	8774118	9871867	7717822	10338953	12305139	9796075	11470940	14578217	12295061	14644631	15731709	13662597	14131655	15439297	15293325	13943982	13306602	14145907
1198	ribitol	Carbohydrate	Pentose Metabolism	15772	LC/MS Polar	100000406	1789.6	151.061	6912	488-81-3	C00474	HMDB00508	136274	140272	97463	177669	198037	179228	294498	251383	171265	222892	188064	136714	270149	318596	166709	282881	269010	175159	191249	173530	195254	239921	190475	224217
1199	ribonate	Carbohydrate	Pentose Metabolism	27731	LC/MS Polar	100001007	2425	165.041	5460677	5336-08-03	C01685	HMDB00867	3734980	1.95537e+06	2517170	4341509	3.91542e+06	3159812	2589768	3787673	2193471	3842632	3024396	2927939	3337628	3918243	3317844	4913446	3.84314e+06	2419155	5063351	2696993	3186164	3239761	3.96591e+06	3035025
1223	ribulonate/xylulonate/lyxonate*	Carbohydrate	Pentose Metabolism	61858	LC/MS Polar	100019968	2350	165.041					11407105	13163926	12715865	11853002	13950930	13501015	10659837	8580724	8892576	11833032	10374881	10129006	10087115	10815415	9186146	15071224	14659336	10357903	14138568	11343286	13318889	12510590	12180372	11857932
60	S-1-pyrroline-5-carboxylate	Amino Acid	Glutamate Metabolism	42370	LC/MS Pos Early	35	1528	114.055	1196	2906-39-0	C04322	HMDB01301	2028255	856085	1845123	2647955	1427668	2502874	2087834	1882003	2186537	1721887	927069	2.08359e+06	2697995	1318873	2792178	2335477	1694070	2734661	2725030	1357562	2743640	2205871	1947433	1565965
4829	S-allylcysteine	Xenobiotics	Food Component/Plant	43239	LC/MS Pos Early	100004509	2690	162.058	98280	21593-77-1		HMDB34323	259081	276686	405518	4925544	4866002	6322854	466496	384998	376687	53750	38628	58007	154402	199337	157203	585448	677046	723327	1632429	1450975	2036785	1511263	1404520	1456009
415	S-carboxyethylcysteine	Amino Acid	Methionine, Cysteine, SAM and Taurine Metabolism	64177	LC/MS Pos Early	100021530	1785	194.048		4033-46-9			129385	140299	133224	359096	478530	401009	231407	265391	235630	129965	148987	136115	127966	161768	158819	264394	292671	252230	150364	139054	201806	230121	144215	167331
412	S-methylcysteine	Amino Acid	Methionine, Cysteine, SAM and Taurine Metabolism	39592	LC/MS Neg	100002749	880	134.028	24417	1187-84-4		HMDB02108	904781	851696	1100545	763034	715826	874914	743114	628134	607854	727183	661634	704587	903652	933578	1.01267e+06	488594	454905	543175	1258062	1109577	1430287	1295333	1283875	1230216
413	S-methylcysteine sulfoxide	Amino Acid	Methionine, Cysteine, SAM and Taurine Metabolism	43378	LC/MS Pos Early	100002927	900	152.038	82142	6853-87-8		HMDB29432	13170328	11539835	15508494	8718742	8125739	8809962	5175829	4382756	4884560	7930925	7119429	9186169	7056470	7661380	8167264	3491560	3784083	3743687	16102153	13927580	17788560	13020245	10474273	10608696
393	S-methylmethionine	Amino Acid	Methionine, Cysteine, SAM and Taurine Metabolism	38127	LC/MS Pos Early	100002183	2555	164.074	458	3493-12-07	C05319	HMDB38670	769159	1043729	1384550	847949	812982	939503	713452	470679	978378	100729	89881	195074	1.02639e+06	628514	797044	1034656	731057	1541543	981991	654615	1599172	1172076	1561235	1.00006e+06
4826	saccharin	Xenobiotics	Food Component/Plant	21151	LC/MS Neg	100000870	2000	181.992	5143	81-07-2	D01085	HMDB29723	309268	592380	629468				84492	99592	55852		50200	27633	69140	119788	41468	148221	205237	158713	458486	528289	769205		36620
5591	salicylate	Xenobiotics	Drug - Topical Agents	1515	LC/MS Polar	501	802	137.024	338	69-72-7	C00805	HMDB01895	317178	429272	409944	800667	771778	886179	2.0147e+06	1945841	1492404	1394067	1633902	1478874	696184	501644	741320	1118072	1142911	1320214	351613	359919	639679	984405	967039	1100052
4	sarcosine	Amino Acid	Glycine, Serine and Threonine Metabolism	1516	LC/MS Pos Early	1023	1280	90.055	1088	107-97-1	C00213	HMDB00271	1991584	1.58459e+06	1919127	2993247	2527803	1805474	3666597	2257981	2410289	1.80988e+06	1786926	1.94782e+06	3014466	3503404	3010063	2587415	2652407	2651901	3.42999e+06	3515026	3.43409e+06	2702724	2435302	2912105
1604	sebacate (C10-DC)	Lipid	Fatty Acid, Dicarboxylate	32398	LC/MS Neg	100001211	1788	201.113	5192	111-20-6	C08277	HMDB00792	270828	169098	399874	100538	111441	203918	341005	250354	270884	341188	262308	382301	193180	199839	205908	133539	107512	164046	285946	202905	245888	465675	290765	311918
9	serine	Amino Acid	Glycine, Serine and Threonine Metabolism	1648	LC/MS Pos Early	503	1239	106.05	5951	56-45-1	C00065	HMDB00187	101875824	88450248	124634400	120300656	105635216	126189984	126896960	97800192	114924544	98200944	84879448	102691152	109148064	122858120	133990032	106611176	97646992	102987632	147118368	124373968	152858368	137679712	129811104	134158856
271	serotonin	Amino Acid	Tryptophan Metabolism	2342	LC/MS Pos Early	504	2550	177.102	5202	153-98-0	C00780	HMDB00259	703743	355990	424288	159785	90619	218091	653112	100264	1056065	81759	44967		1001370	80339	1446443	478053	170010	366789	712066	315879	1194671	1400682	292145	290980
496	spermidine	Amino Acid	Polyamine Metabolism	485	LC/MS Pos Late	50	700	146.165	1102	124-20-9	C00315	HMDB01257	68714		89769	71120	51721		63388		45026			67523	51738	121748	84008	60729	52511	86654	163168		116919	104688		70992
2878	sphinganine	Lipid	Sphingolipid Synthesis	17769	LC/MS Pos Late	313	1413	302.305	3126	3102-56-5	C00836	HMDB00269	522247	136336	192681	99102	288527	192148	436757	234883	188172	273562	427242	517139	226817	437980	145521	251424	516601	281304	358625	208510	208629	182294	280713	222250
2879	sphinganine-1-phosphate	Lipid	Sphingolipid Synthesis	52605	LC/MS Pos Late	100001876	1431	382.272	520	19794-97-9		HMDB01383	74405	42537	72392				62582			135394			96582	106651	69687	108186	92243	82431	112190		92705	110664		90513
2982	sphingomyelin (d17:1/14:0, d16:1/15:0)*	Lipid	Sphingomyelins	62152	LC/MS Pos Late	100020276	1950	661.528					2427123	2625310	3.13878e+06	2184129	3331650	2650056	2492226	2560381	2.04169e+06	2566928	3.51152e+06	2639139	1899612	2333984	1797820	4425563	4410814	4300502	3546769	3484988	3.58136e+06	2072363	2096716	2034388
2985	sphingomyelin (d17:1/16:0, d18:1/15:0, d16:1/17:0)*	Lipid	Sphingomyelins	52433	LC/MS Pos Late	100006314	2082	689.559		121999-58-4			78875064	78143456	91158872	56541332	74914472	67396120	74160976	73484648	60529196	85047968	98648360	82003664	64792376	86174080	63154188	121411728	124850184	119436464	98818032	102638864	116475856	66026480	64392640	64529000
2986	sphingomyelin (d17:2/16:0, d18:2/15:0)*	Lipid	Sphingomyelins	57483	LC/MS Pos Late	100015793	1837	687.544					1589665	1722368	1681298	1064867	1509848	1289297	1087689	1198977	1019239	2026569	2517666	2073332	1327184	1.69637e+06	1199517	2482322	2636681	2230827	1.72945e+06	1.84509e+06	2.04519e+06	1229626	1116287	1157987
2971	sphingomyelin (d18:0/18:0, d19:0/17:0)*	Lipid	Dihydrosphingomyelins	57473	LC/MS Pos Late	100009027	2362	733.622				HMDB12087	18194670	17303020	19949788	10313539	14192392	11747554	14871433	15941963	12513336	21137050	25303768	21633632	7.92843e+06	9639936	7458063	21766996	24331948	22304714	14971439	15109362	16678380	11832629	11264670	10945695
2972	sphingomyelin (d18:0/20:0, d16:0/22:0)*	Lipid	Dihydrosphingomyelins	57476	LC/MS Pos Late	100015786	2600	761.653					7.84692e+06	8.16177e+06	8990437	6060960	7802908	6807355	7049583	7560611	5972943	6942962	8309532	6993878	3730242	4712581	3849904	10673148	11059111	10912651	7.74737e+06	7.82274e+06	8272747	7681047	7015957	7139604
2983	sphingomyelin (d18:1/14:0, d16:1/16:0)*	Lipid	Sphingomyelins	42463	LC/MS Pos Late	100004328	1998	675.544	11433862			HMDB12097	139669760	152424128	163433824	116998400	159583968	134648304	106423776	110586888	95321112	132643328	160632384	125583808	111558016	128969472	102731120	195265504	197307680	189521920	162542048	165151024	181158816	121118904	115431384	114867568
2988	sphingomyelin (d18:1/17:0, d17:1/18:0, d19:1/16:0)	Lipid	Sphingomyelins	52615	LC/MS Pos Late	100008920	2312	717.591		121999-64-2			33565884	34871360	38403508	27018058	36735284	31220208	32667578	34712776	29623874	46563036	54325180	45404880	29804236	38224848	26631210	54045404	56234696	53976976	47633708	48040320	51300224	30736920	30254852	27711384
2989	sphingomyelin (d18:1/18:1, d18:2/18:0)	Lipid	Sphingomyelins	37529	LC/MS Pos Late	100002106	2167	729.591	6443882	108392-10-5		HMDB12101	71727648	74857920	76439904	56072376	64499392	59555108	62865512	61608888	57415964	95919904	106121552	97928360	61055576	65283632	60815496	84906976	84011736	81498416	75615448	77401632	79689064	57334488	58504640	56857168
2990	sphingomyelin (d18:1/19:0, d19:1/18:0)*	Lipid	Sphingomyelins	57475	LC/MS Pos Late	100015787	2330	745.622					24043872	25305236	26881430	18811472	25056462	22471132	18195502	18691560	15261271	29519256	36160528	27987940	12786731	15980086	12681928	32526674	33640224	33016028	30022102	28812310	28108898	16422132	16037515	15430161
2991	sphingomyelin (d18:1/20:0, d16:1/22:0)*	Lipid	Sphingomyelins	48490	LC/MS Pos Late	100006290	2685	759.638				HMDB12102	233240384	239345312	271151552	234375392	276110400	255717280	204132640	210956896	177656160	254428128	280891872	249175200	213968112	256267392	211315584	328398208	321757664	325518592	270453600	277482336	295986016	233771120	222908320	225648592
2992	sphingomyelin (d18:1/20:1, d18:2/20:0)*	Lipid	Sphingomyelins	48491	LC/MS Pos Late	100006292	2383	757.622		222403-67-0			42561104	41664216	43929264	42710344	44642276	43513512	42910356	41936400	38320744	57303468	64897092	58968932	48416792	50415696	45734912	56118968	49250052	52189660	53987568	51375376	57286580	49922888	47387648	46833144
2993	sphingomyelin (d18:1/20:2, d18:2/20:1, d16:1/22:2)*	Lipid	Sphingomyelins	57481	LC/MS Pos Late	100006293	2039	755.606					1382616	1854147	1652334	1658770	1973327	1.6789e+06	1092382	1381218	901260	2061884	2577764	1951371	763222	1106916	415435	1454406	1436971	1373559	1.97802e+06	1.95535e+06	1892193	1.91869e+06	1557203	1586321
2994	sphingomyelin (d18:1/21:0, d17:1/22:0, d16:1/23:0)*	Lipid	Sphingomyelins	52495	LC/MS Pos Late	100009025	2793	773.653					73767840	83644144	93679376	70168400	92163264	78464864	67510976	72053592	58564524	90077472	122196952	103233888	52475804	64830436	55012144	114719632	121994448	99109200	100081280	102526592	113643008	65277176	62788064	64125000
2996	sphingomyelin (d18:1/22:1, d18:2/22:0, d16:1/24:1)*	Lipid	Sphingomyelins	48493	LC/MS Pos Late	100006295	2666	785.653				HMDB12104	293134592	306445440	340442816	286576448	343482688	316935648	256012864	268219392	224106496	325182592	369568032	321585056	381376864	457717056	379139488	390667360	382678496	379713536	392171552	401202144	425649056	353058976	337196448	336731616
2997	sphingomyelin (d18:1/22:2, d18:2/22:1, d16:1/24:2)*	Lipid	Sphingomyelins	57477	LC/MS Pos Late	100006296	2209	783.638					14286648	13762530	14635515	13184330	16141813	14088381	12580629	13693272	11871544	18225984	21703172	18761140	9184077	10490768	9482860	14808146	16295143	14556634	19948144	21175046	21345280	16205567	15240859	15916059
2999	sphingomyelin (d18:1/24:1, d18:2/24:0)*	Lipid	Sphingomyelins	47153	LC/MS Pos Late	100005986	3033	813.684		94359-13-4		HMDB12107	707095424	707497088	772916032	700547200	892058624	782827328	623276480	651517824	543989888	737458240	853495168	714485184	968046720	1201229184	954851392	970869760	1040308608	992637440	939043584	919973696	1014495040	1079060096	1051614208	1049525696
3001	sphingomyelin (d18:1/25:0, d19:0/24:1, d20:1/23:0, d19:1/24:0)*	Lipid	Sphingomyelins	57478	LC/MS Pos Late	100015792	3500	829.716					10424971	10721689	11837845	9073868	10957110	9939582	9573728	9964280	8205493	13864218	15817874	13793786	5.80318e+06	7400828	6065924	13677823	14779379	13913702	15052256	15653030	16832150	9988486	10108097	10170000
2984	sphingomyelin (d18:2/14:0, d18:1/14:1)*	Lipid	Sphingomyelins	47154	LC/MS Pos Late	100005985	1860	673.528					5865336	6156523	6525790	6554402	9329886	8031072	5079539	5078997	4254817	6568169	8635137	6278360	7007099	9387060	6568669	10395928	10648147	10366109	7298926	8165047	8547981	7722029	7926676	7886897
2987	sphingomyelin (d18:2/16:0, d18:1/16:1)*	Lipid	Sphingomyelins	42459	LC/MS Pos Late	100004329	2002	701.559					144169136	152480256	165463616	129280672	174461200	148603408	115815360	119546384	102909768	155611824	187449376	147281776	214838928	248667696	197281856	226365248	226917568	217850144	192699216	190273696	213409824	196773280	187302512	184318176
2979	sphingomyelin (d18:2/18:1)*	Lipid	Sphingomyelins	57474	LC/MS Pos Late	100015788	1904	727.575					6551387	6991320	7285922	6089944	8.25797e+06	7246588	5079968	5414240	4760234	9007956	10902327	8645865	6838819	8834514	6750173	9696421	9985725	9874042	8582756	8782824	9311767	8442901	8101543	8001733
2995	sphingomyelin (d18:2/21:0, d16:2/23:0)*	Lipid	Sphingomyelins	57480	LC/MS Pos Late	100015790	2330	771.638					11226692	11583770	12672496	9096929	11806378	10185999	8948101	9276188	8.16504e+06	15709447	19208008	15186684	7.9133e+06	10778181	7918838	13056550	13815889	13598779	12970530	12989480	15184779	9139312	8593121	8531543
2998	sphingomyelin (d18:2/23:0, d18:1/23:1, d17:1/24:1)*	Lipid	Sphingomyelins	52435	LC/MS Pos Late	100008956	2845	799.669					134090992	138137104	151523936	117087296	156977280	131573856	118846064	128022648	97118448	183759696	216943632	180799552	130727664	165275952	128236800	190015488	204480192	187787728	187510128	191641312	209246496	150666400	143174576	144269600
2980	sphingomyelin (d18:2/23:1)*	Lipid	Sphingomyelins	57482	LC/MS Pos Late	100015791	2315	797.653					11491167	11416349	12912837	9788243	13295659	11055414	11459382	11934010	9902053	18420592	22287350	17685260	9180841	11320937	8479439	16189618	16297890	16456727	17221330	17313810	18633204	11595919	11430157	11034777
3000	sphingomyelin (d18:2/24:1, d18:1/24:2)*	Lipid	Sphingomyelins	52437	LC/MS Pos Late	100008957	2635	811.669					269244544	283268160	315162400	276795936	347283360	312542688	258126032	268472000	221101984	324539712	371836032	316141632	409704000	490679328	398529504	390237344	386246560	377108544	418603648	424428448	460852768	457944768	438814752	438527168
2981	sphingomyelin (d18:2/24:2)*	Lipid	Sphingomyelins	57479	LC/MS Pos Late	100015789	2215	809.653					9220974	12927115	10332571	16140212	19809270	18172520	10948892	15735736	13148755	19555168	23214656	19750464	17684040	16628468	17126174	18281838	18747122	14685555	24336268	25788332	26518520	25723464	24901396	24928592
3029	sphingosine	Lipid	Sphingosines	17747	LC/MS Pos Late	297	1393	300.29	5353955	123-78-4	C00319	HMDB00252	309797	185292	245830	223138		203519	280121	212213	214245	217187	220510	207142	365475	270357	315850	324395	284233	249823	313162	250850	249131	372705	221565	219316
3031	sphingosine 1-phosphate	Lipid	Sphingosines	34445	LC/MS Pos Late	100000626	1375	380.256	5283560	26993-30-6	C06124	HMDB00277	478407	429275	541834	453215	674863	468864	432194	416505	392662	873318	458516	354551	679429	831565	663133	666409	538775	603378	539726	435184	456496	712875	634764	527523
4848	stachydrine	Xenobiotics	Food Component/Plant	34384	LC/MS Pos Early	100001296	1440	144.102	115244	4136-37-2	C10172	HMDB04827	128188808	119828800	139300144	339575584	338893088	322979008	4299662	3943496	3148982	18674304	17381544	16440423	196802736	218746208	193325584	1270304384	1143624832	867667200	367987520	353880192	378516704	107465848	97696032	99343824
1439	stearate (18:0)	Lipid	Long Chain Saturated Fatty Acid	1358	LC/MS Neg	439	5872	283.264	5281	57-11-4	C01530	HMDB00827	829916096	781291904	811914752	523585344	578422592	715742976	615908160	615607424	459763680	840975040	1033980608	1123909504	893133504	981907456	694744832	1158799104	972081472	939600512	1632357632	1119343872	1300469888	1041966400	977361856	1035098240
1482	stearidonate (18:4n3)	Lipid	Long Chain Polyunsaturated Fatty Acid (n3 and n6)	33969	LC/MS Neg	100001229	5395	275.202	5312508	111174-40-4	C16300	HMDB06547	936537	806421	708746	280868	337509	400300	289704	346431		641522	864056	885339	2170451	2711555	759577	2622418	1.90681e+06	991485	4561260	2714677	3647712	1620271	1934764	1.98791e+06
2975	stearoyl sphingomyelin (d18:1/18:0)	Lipid	Sphingomyelins	19503	LC/MS Pos Late	1538	2400	731.606	6453725	85187-10-6;85187-10-6	C00550	HMDB01348	173919136	174881536	179528144	154105680	158023328	156389936	172294048	171264944	156646672	246677408	269349760	244020880	138239296	145274688	128139912	225803264	200739904	213792944	196739488	199832224	220858080	151325728	146600656	144091344
2815	stearoyl-arachidonoyl-glycerol (18:0/20:4) [1]*	Lipid	Diacylglycerol	57450	LC/MS Pos Late	100010949	3404	662.572					865792	760590	863820	462070	979726	580101	179480	253587	207420	497263	572008	459037	675691	992499	618256	1121013	1081296	1154517	492131	238264	549598	458353	337949	526949
2816	stearoyl-arachidonoyl-glycerol (18:0/20:4) [2]*	Lipid	Diacylglycerol	57449	LC/MS Pos Late	100010950	3522	662.572					261513	47772	92875			144558					294168		179990	400552	310997	229459	315667	458332	272086		323663	107096	175500	238255
2797	stearoyl-linoleoyl-glycerol (18:0/18:2) [1]*	Lipid	Diacylglycerol	54948	LC/MS Pos Late	100010920	3650	638.572					704168	427218	308950	114554	293043	261087	156897	294925	247899	186210	379505	308113	367089	575593	520839	480140	871456	870008	236433		339776	155668	238844	356929
2798	stearoyl-linoleoyl-glycerol (18:0/18:2) [2]*	Lipid	Diacylglycerol	54947	LC/MS Pos Late	100010921	3762	638.572					492812	901886	1.15433e+06	80253.8	556223	426753	307867	593636	295307	493395	548603	517943	685372	1.08279e+06	362576	1.42658e+06	1333555	1.43257e+06	267419	253730	745976	271940	234866	415953
1782	stearoylcarnitine (C18)	Lipid	Fatty Acid Metabolism (Acyl Carnitine, Long Chain Saturated)	34409	LC/MS Pos Late	100001391	1485	428.373	6426855	18822-91-8		HMDB00848	2543540	2452342	2940147	1258900	1716162	1465837	1932496	2205680	1862722	1840613	2326968	1731021	2557494	3554904	2.5827e+06	3581711	3964773	3.81627e+06	2205490	2261214	2504613	2213457	2205812	2195689
1859	stearoylcholine*	Lipid	Fatty Acid Metabolism (Acyl Choline)	57464	LC/MS Pos Late	100015759	1520	370.368					1669628	239220	2188834	4545884	121818	3302170	2684332	400351	2778532	3397142	304636	6550867	1286342		6124688	2074030	652004	13013494	2993324		12870133	11027316	2406122	2.07724e+06
1599	suberate (C8-DC)	Lipid	Fatty Acid, Dicarboxylate	15730	LC/MS Neg	100000016	804.3	173.082	10457	505-48-6	C08278	HMDB00893	57860	59943	122618	112861	166025	137316	137370	137515	194590	352227	522964	335655	104373	98483	108439	100318	114617	112738	129068	65329	129481	84917	177174	164362
1825	suberoylcarnitine (C8-DC)	Lipid	Fatty Acid Metabolism (Acyl Carnitine, Dicarboxylate)	52990	LC/MS Pos Early	100006627	2964	318.191					129096	124690	192600					59034		212869	249907	192810						79874	576385	403721	263320	118596		99211
1378	succinate	Energy	TCA Cycle	1437	LC/MS Neg	252	603	117.019	1110	110-15-6	C00042	HMDB00254	4622665	12582431	4651619	7363240	32286208	6597326	8.17015e+06	27854648	5629067	5524732	25282806	4836551	7.7376e+06	32935174	5534609	6003605	27482516	5825878	9991445	24373124	6085407	6636819	15427321	15390357
5785	succinimide	Xenobiotics	Chemical	41888	LC/MS Neg	100003696	1270	98.0248	11439	123-56-8	C07273		120445	147569	158079	276953	80885	228292	344188	323031	217977	167886	318980	221171	170841	335568	240562	252323	237488	254149	239401	209191	250735	376044	679024	326799
429	succinoyltaurine	Amino Acid	Methionine, Cysteine, SAM and Taurine Metabolism	63678	LC/MS Polar	100021220	2572	224.023					221615	192187	245834	92776	86097	97298	232079	191999	143514	166989	136660	99941	166259	174530	138757	245753	300862	172099	302492	241232	165904	296343	162365	258766
1377	succinylcarnitine (C4-DC)	Energy	TCA Cycle	37058	LC/MS Pos Early	100001948	2291	262.128	71464481	256928-74-2		HMDB61717	781945	852078	869430	681213	643877	538695	997541	839051	749321	693175	650148	686140	627581	751213	549157	857510	810783	674615	680539	379640	592595	573377	484559	463121
1258	sucrose	Carbohydrate	Disaccharides and Oligosaccharides	1519	LC/MS Neg	935	865	341.109	5988	57-50-1	C00089	HMDB00258	108775	129825	156551	102179	116874	140488	391769	417322	455171	62241	98937	53259	261896	374243	343031	2.07729e+06	282459	281553	76048	99199	135528	371051	514073	470357
4802	sulfate of piperine metabolite C16H19NO3 (2)*	Xenobiotics	Food Component/Plant	62295	LC/MS Neg	100020496	4112	352.086					2540595	2740812	3012951	6389213	8.36839e+06	6166289	3469472	3706345	2.97234e+06	2132832	2489644	1933798	812362	962418	928271	2856144	3631272	3.21127e+06	2138046	2277281	2675602	1.91969e+06	2343449	2291147
4803	sulfate of piperine metabolite C16H19NO3 (3)*	Xenobiotics	Food Component/Plant	62296	LC/MS Neg	100020497	4200	352.086					877484	926848	950092	1.94583e+06	2560609	2056468	1147934	1289140	1141686	642976	739309	581839	240944	285504	319932	1016617	1216091	1109658	663608	648490	834737	603382	725156	839576
4808	sulfate of piperine metabolite C18H21NO3 (1)*	Xenobiotics	Food Component/Plant	62297	LC/MS Neg	100020502	4481	378.102					561582	529656	620338	1650225	1738963	1794829	326961	323439	292659	1351673	1479845	1567269	350234	474575	438126	847135	978922	927279	587944	577586	696367	361348	357842	361122
4810	sulfate of piperine metabolite C18H21NO3 (3)*	Xenobiotics	Food Component/Plant	62299	LC/MS Neg	100020504	4630	378.102					397905	351938	416079	1.01608e+06	1119972	1172322	198870	230447	235673	911595	1019398	954826	236920	259723	283175	587766	676820	641397	348350	331980	426810	237624	275230	255118
5678	sulfate*	Xenobiotics	Chemical	46960	LC/MS Neg	100002528	616	96.9601	1118	14808-79-8	C00059	HMDB01448	137736944	126369120	145166832	140697984	148992032	146841888	163765696	139839520	128656064	157260576	151522032	144338656	139077408	131034016	121768240	130048712	118068616	115071544	140917344	117948696	140376416	167038768	150869808	144565536
4857	tartarate	Xenobiotics	Food Component/Plant	15336	LC/MS Neg	100000295	615.3	149.009	444305	87-69-4;6106-24-7	C00898	HMDB00956	409987	315156	469454	338439	288681	440947	208183		205377	37844652	31147588	20739966	275723	101903	173063	660388	588392	622956	3413107	2407395	4196754	662087	690418	668728
4983	tartronate (hydroxymalonate)	Xenobiotics	Food Component/Plant	20693	LC/MS Neg	100000840	610	118.999	45	80-69-3	C02287	HMDB35227	2220838	1438962	2083424	1904924	1711113	2169340	2156873	1251622	1467773	2365924	1509016	2845878	2081536	1977596	2416104	2787441	1968215	2942063	3447064	1348079	3537000	3886150	2793015	2906553
426	taurine	Amino Acid	Methionine, Cysteine, SAM and Taurine Metabolism	2125	LC/MS Pos Early	512	660	126.022	1123	107-35-7	C00245	HMDB00251	55213448	44302424	45751572	63436856	72063736	60741416	69230488	63323408	55982484	73615112	63897720	54001596	52071936	63531416	53744624	62878788	58986116	46575040	66572012	63150512	60321416	72342120	61752356	61045312
3314	taurochenodeoxycholate	Lipid	Primary Bile Acid Metabolism	18494	LC/MS Neg	1629	5250	498.289	387316	6009-98-9	C05465	HMDB00951	1149472	466688	1548248	1113171	791768	1.29836e+06	1115834	1433802	1124218	2033528	2582961	3477398	1209825	611527	1250429	722972	349984	714471	338486	247161	489597	3044083	2010023	2113119
3390	taurochenodeoxycholic acid 3-sulfate	Lipid	Secondary Bile Acid Metabolism	62890	LC/MS Neg	100021093	4809	288.62				HMDB02486	94931	92210	143264		34787	44749	232680	263758	216594	437253	526000	398298	109986	134830	182019	54761	31011	67446	71405	67175	104527	436740	355339	363208
3307	taurocholate	Lipid	Primary Bile Acid Metabolism	18497	LC/MS Neg	1648	5150	514.284	6675	145-42-6	C05122	HMDB00036	483098	363978	747176	532796	776821	933699	631375	819492	522403	2755376	3158140	2859461	249898	248127	417216	288541	170791	374226	79772	61576	157220	1249081	786126	748820
3385	taurocholenate sulfate*	Lipid	Secondary Bile Acid Metabolism	32807	LC/MS Neg	100001990	4750	279.614					1374808	1484852	1593149	296017	382280	289044	674393	626075	421115	1189978	1191687	967354	865442	796136	690853	988450	890813	787292	1270440	869398	778209	2297956	2108207	2.09457e+06
3339	taurodeoxycholate	Lipid	Secondary Bile Acid Metabolism	12261	LC/MS Neg	1668	5257.4	498.289	2733768	207737-97-1	C05463	HMDB00896	1349404	579410	2.02704e+06	3337442	2332086	3961902	211653	297462	199259	3.90561e+06	4464674	6664444	936906	471690	912565	316287	139317	318195	264710	191250	328672	2874800	1.87463e+06	1748965
3340	taurodeoxycholic acid 3-sulfate	Lipid	Secondary Bile Acid Metabolism	62889	LC/MS Neg	100006644	4850	288.62					212115	180303	246240	155778	217006	236486	31513	31093	41116	632313	780823	533058	114367	123315	121000	22908	30297	36321	104977	122822	130810	453882	384491	408954
3350	taurolithocholate	Lipid	Secondary Bile Acid Metabolism	31889	LC/MS Neg	100001065	5345	482.295	10595	516-90-5	C02592	HMDB00722	35142		58119	63654	29631	77519				73472	53575	102520	71417		49655		18757	61406				132877	53657
3351	taurolithocholate 3-sulfate	Lipid	Secondary Bile Acid Metabolism	36850	LC/MS Neg	100001658	5027	280.622	440071	64936-83-0	C03642	HMDB02580	1104607	1044842	1405092	550639	1088524	1279845	820309	915377	729375	2532241	3034513	2411433	1384606	1633974	2103272	766321	918778	1232260	474639	534159	671421	3994081	3521069	3634374
1617	tetradecadienedioate (C14:2-DC)*	Lipid	Fatty Acid, Dicarboxylate	62918	LC/MS Neg	100021100	3148	253.144					226314	203288	237789	191996	225734	311089	186324	216848	178405	231078	258083	295874	200820	178345	132645	297945	249273	248586	312117	242823	243916	359382	239100	239626
1475	tetradecadienoate (14:2)*	Lipid	Long Chain Polyunsaturated Fatty Acid (n3 and n6)	62850	LC/MS Neg	100020343	5292	223.17	5312409	39039-37-7		HMDB00560	1221431	856324	989381	386110	626257	801961	531988	840022	422509	900086	1.99831e+06	1401050	1928178	1.72968e+06	920907	1.83044e+06	2.08762e+06	1601774	3657885	2197859	3541993	3177763	2408168	2433411
1614	tetradecanedioate (C14)	Lipid	Fatty Acid, Dicarboxylate	35669	LC/MS Neg	100001613	3985	257.176	13185	821-38-5		HMDB00872	1059383	810729	1131919	343395	313149	399074	652639	527780	505646	527038	570201	747651	630962	586091	571469	677321	522992	468504	2322142	929732	1189267	1192709	757499	789517
3189	tetrahydrocortisol sulfate (1)	Lipid	Corticosteroids	62793	LC/MS Neg	100020848	4276	445.19					25873	26857	37415				35743	29437	20437				33326	29313	18316	92015	92566	53368	74914	49740	46543
4858	theanine	Xenobiotics	Food Component/Plant	22206	LC/MS Pos Early	100000784	2180	175.108	439378	3081-61-6	C01047	HMDB34365	70505	119433						132106	200580				341950	345870	271971	964620	932511	1096411	177821	149113	148613
4411	theobromine	Xenobiotics	Xanthine Metabolism	18392	LC/MS Pos Early	100000445	1600	181.072	5429	83-67-0	C07480	HMDB02825	3193710	3581902	4656929	13708309	14570413	14173095	18059724	17382074	18683172	7289547	7551952	6425560	75450816	87450136	84280840	12039499	12161357	12544924	17535744	16064600	17118852	21352228	22142196	21259840
4412	theophylline	Xenobiotics	Xanthine Metabolism	18394	LC/MS Neg	100000437	2356.9	179.058	2153	58-55-9	C07130	HMDB01889	4070662	4103522	5207158	19606188	20132822	20348844	8522876	7690693	7935720	7857507	8213600	8748572	3908347	3997037	4405808	2517461	2592502	2618780	17013380	15048237	18349952	10622579	10214052	10450785
5821	thioproline	Xenobiotics	Chemical	53231	LC/MS Pos Early	100009232	1250	134.027	93176	34592-47-4			17971304	17051488	16175700	17272398	20672766	16480080	13554923	20745788	15250318	11604235	13599482	11623214	16750233	22823040	18393760	17060148	19243804	11359382	16589292	25462320	16943738	16117515	17550580	19563456
4190	threonate	Cofactors and Vitamins	Ascorbate and Aldarate Metabolism	27738	LC/MS Polar	100001022	2384	135.03	151152	70753-61-6	C01620	HMDB00943	282119456	242937200	316833792	303195744	288908384	327417792	197988128	154025248	170851360	296551040	282894112	276702080	389042528	321668544	372981120	395040352	376539040	360945984	489236128	353411872	443467264	604318080	520102816	544432320
16	threonine	Amino Acid	Glycine, Serine and Threonine Metabolism	1284	LC/MS Pos Early	564	1514	120.066	6288	72-19-5	C00188	HMDB00167	435769472	372234208	488116928	390211584	324507456	368006400	525544064	403698592	447355360	329405952	259496064	325563264	378172768	382199008	432729760	287866048	278361216	284667040	513371520	424828160	516705568	355294080	320382016	320522720
4861	thymol sulfate	Xenobiotics	Food Component/Plant	36095	LC/MS Neg	100001757	4410	229.054		89-83-8	C09908	HMDB01878	1331258	1495953	1771404	61579080	76016408	79037296	13274896	14796823	14007233	7107210	8438449	8815469	4179166	5248065	5275082	7365549	9040360	9110445	3607038	3.75984e+06	4.05075e+06	1397107	1451184	1496468
232	thyroxine	Amino Acid	Tyrosine Metabolism	2761	LC/MS Neg	1094	4808	775.679	5819	51-48-9	C01829	HMDB01918	127618	115116	147913	142321	146720	185160	139819	116938	110482	123633	117276	120938	154124	152626	166874	165939	170220	165466	263681	185209	265833	204248	174487	176679
360	tiglyl carnitine (C5)	Amino Acid	Leucine, Isoleucine and Valine Metabolism	35428	LC/MS Pos Early	100001597	2962	244.154	22833596	64191-86-2		HMDB02366	681010	618471	587817	786119	802555	711690	1207249	996587	890980	1090533	881286	691737	647677	669494	476303	810787	1.02398e+06	859780	1137275	751380	1008573	730819	647696	611970
4930	trans-3,4-methyleneheptanoate	Xenobiotics	Food Component/Plant	53026	LC/MS Neg	100006651	3807	141.092					129349	330804	379806	68974		39701						27379	99977	348188		137948	121053	171678	99464	85518	188672	380603	211763	96050
465	hydroxyproline	Amino Acid	Urea cycle; Arginine and Proline Metabolism	32306	LC/MS Pos Early	1001	1064	132.065	5810	51-35-4	C01157	HMDB00725	56852848	50328888	66180200	82788728	68707632	78885096	62821120	52886320	53712548	84484600	76267464	77493144	35503176	35758436	35247312	50122336	49793280	61343128	44080204	41815832	43399124	40035968	42454900	37998624
74	trans-urocanate	Amino Acid	Histidine Metabolism	607	LC/MS Pos Early	537	2285	139.05	736715	104-98-3	C00785	HMDB00301	5775807	3534466	4807101	4076430	2899442	2573095	5927993	3559243	3.32601e+06	5385832	2492125	1358224	1192804	3080715	4566985	2218795	2329147	1157786	2882214	1388853	2764545	5373310	3448591	3.14408e+06
2977	tricosanoyl sphingomyelin (d18:1/23:0)*	Lipid	Sphingomyelins	52436	LC/MS Pos Late	100008955	3200	801.684				HMDB12105	143612128	149158352	158480416	142486704	181149504	159497360	131284224	140423744	111261304	208734960	244234928	209289472	146006272	181597120	144942736	232382112	244047456	239562720	184621024	182248800	204361296	182825648	179871696	173497440
1613	tridecenedioate (C13:1-DC)*	Lipid	Fatty Acid, Dicarboxylate	62919	LC/MS Neg	100002199	3051	241.144					760838	689917	1099599	246153	344077	500445	606923	478727	415284	789747	944678	635461	479516	691063	425169	656866	610816	588600	1008665	915820	985960	939135	688185	683454
4162	trigonelline (N'-methylnicotinate)	Cofactors and Vitamins	Nicotinate and Nicotinamide Metabolism	32401	LC/MS Pos Early	100001092	1388	138.055	5570	535-83-1	C01004	HMDB00875	12551884	15406380	11519346	18511352	32309816	21050656	44805400	54369516	37403456	47852516	73663416	49620556	9437767	14712333	6020885	22297402	30664740	16785524	45244256	68992872	54645732	65584992	82233520	77296960
2134	trimethylamine N-oxide	Lipid	Phospholipid Metabolism	40406	LC/MS Pos Early	100003397	2100	76.0757	1145	1184-78-7	C01104	HMDB00925	24893048	23326044	26016844	17726276	18920954	16003464	21570088	17979524	13673661	36510984	34484512	26093694	31610370	38572024	36474064	19326042	21555636	21592692	41271180	42468028	51335068	29268558	27965894	28941648
240	tryptophan	Amino Acid	Tryptophan Metabolism	54	LC/MS Pos Early	565	2986	205.097	6305	73-22-3	C00078	HMDB00929	373107008	327948192	399767808	455285888	389600448	472509856	491027264	391984160	470601344	442106240	370884192	388306496	481689024	441379104	582492928	460358176	407513568	416156512	454148832	379327904	472522528	456643936	396177216	413276704
249	tryptophan betaine	Amino Acid	Tryptophan Metabolism	37097	LC/MS Pos Early	100001743	2673	247.144	442106	20671-76-5	C09213	HMDB61115	3.66233e+06	3720643	4333836	53364272	58698232	51921216	53844	63097		10614884	10499881	10855155	27498154	35768568	27370200	30758424	32103136	28548456	10986624	10060068	11034101	146325920	139077904	135282560
216	tyramine O-sulfate	Amino Acid	Tyrosine Metabolism	48408	LC/MS Neg	100006092	1565	216.034	153005	30223-92-8		HMDB06409	1.81893e+06	2117451	3010321	189403	192188	214558	322629	305072	352762	439555	388416	381028	1210742	984020	987308	376028	404539	456696	127395	140273	214942	474133	580957	550650
155	tyrosine	Amino Acid	Tyrosine Metabolism	1299	LC/MS Pos Early	815	2430	182.081	6057	60-18-4	C00082	HMDB00158	231388800	255971936	356981760	260420640	293601376	282880512	399250176	315415520	367096192	245496288	232704960	193952992	337146784	372000320	365225760	321911072	297345952	343933312	224106496	202629392	197664016	222256640	262993504	241550496
4901	umbelliferone sulfate	Xenobiotics	Food Component/Plant	48674	LC/MS Neg	100006282	2440	240.981	129659	69526-88-1			69081	97464	161974	924597	1154531	1373622	276007	427189	313387	1234128	1466843	1476274	52800	73373	71548	110998	121536	110064	24007		38527	23646	17929	23234
1794	undecenoylcarnitine (C11:1)	Lipid	Fatty Acid Metabolism (Acyl Carnitine, Monounsaturated)	63613	LC/MS Pos Late	100021131	1069	328.248					1975142	1770511	2413504	600876	1275168	856713	709730	981363	747379	993997	1740388	1388106	1377454	2235517	1397657	1436299	1.50896e+06	1196820	2717889	3101938	2404910	2300537	2.04052e+06	2344004
4066	uracil	Nucleotide	Pyrimidine Metabolism, Uracil containing	605	LC/MS Neg	825	1086	111.02	1174	66-22-8	C00106	HMDB00300	186246	188476	135489	206120	249222	170435	195939	191025	131896	217278	255223	167965	128610	152442	107908	175829	243124	132775	163077	210249	102563	167590	237857	223546
3978	urate	Nucleotide	Purine Metabolism, (Hypo)Xanthine/Inosine containing	1604	LC/MS Pos Early	1134	776	169.036	1175	69-93-2;120K5305	C00366	HMDB00289	245318352	196049728	201957968	340864736	283504032	261025664	240441232	185422784	163828736	273601472	217700960	227125456	169998336	180746016	159254416	327038432	319838112	278741152	250693744	239332704	232535440	282987392	233143152	247892816
438	urea	Amino Acid	Urea cycle; Arginine and Proline Metabolism	1670	LC/MS Pos Early	533	700	121.072	1176	57-13-6	C00086	HMDB00294	414245792	362438048	437366240	439511776	436902208	431559104	447738944	377954752	323485536	551118208	490146240	473235840	412032736	474203552	403987744	385551520	391414784	342334784	393848096	360100352	385243264	472013408	418241824	422443136
4065	uridine	Nucleotide	Pyrimidine Metabolism, Uracil containing	606	LC/MS Neg	535	1457.6	243.062	6029	58-96-8	C00299	HMDB00296	12369115	13512551	8818372	18163304	22312028	18230394	13323740	12941807	8509304	16087290	17789046	13440430	8.37533e+06	9719481	6729065	15472579	20278728	10819950	18482512	18400952	16115327	14711781	14450401	14034198
3353	ursodeoxycholate	Lipid	Secondary Bile Acid Metabolism	1605	LC/MS Neg	1135	5055	391.285	31401	128-13-2	C07880	HMDB00946	215948	257651	338483	146891	261247		262927	150509	183137	44375.7	109997	128990	437312	298204	316340	14094.1	41535	102971	65641.1	84452	188086	50364	70237	102198
1415	valerate (5:0)	Lipid	Short Chain Fatty Acid	33443	LC/MS Neg	1136	1718	101.061	7991	109-52-4	C00803	HMDB00892	348405	317235	477186	186676	389626	297519	401896	533760	1281502	410862	398451	297639	213858	1391234	331779	334291	680190	349847	199367	474711	261815	359394	506514	464239
372	valine	Amino Acid	Leucine, Isoleucine and Valine Metabolism	1649	LC/MS Pos Early	566	2479	118.086	6287	72-18-4	C00183	HMDB00883	1096145280	982266880	1301332992	1145394432	1106523008	1290116992	1499648000	1208446464	1260128512	1142431616	975769088	1245202944	1314476416	1449346048	1515998464	1226190464	1257321088	1246690432	1247757824	1156950912	1417699072	1318043648	1086731008	1128737664
978	valylglycine	Peptide	Dipeptide	40475	LC/MS Neg	100003641	1506	173.093	136487	686-43-1		HMDB29127		66740	71690	367002	379696	352960	168620			192846						136656			69975		57796	731988	529012	583984
191	vanillactate	Amino Acid	Tyrosine Metabolism	54910	LC/MS Neg	100006129	1625	211.061	160637	2475-56-1		HMDB00913	82778	89768	60280	75793	109581	59779	131363	101788	75648	143761	189807	115707	75326	103118	62645	138963	161892	98809	84359	84940	78709	82890	109946	102562
4994	vanillic acid glycine	Xenobiotics	Food Component/Plant	63853	LC/MS Neg	100021363	1682	224.056	3083688			HMDB60026	78059	112146	117831	137043	339465	220615	881660	1458698	2169952	81623	126344	84995	147795	227652	212991	87851	155252	166907	62036	69515	111048	43189	75151	64791
218	vanillic alcohol sulfate	Amino Acid	Tyrosine Metabolism	48733	LC/MS Neg	100006125	1808	233.012		754920-02-0			38840	44791	66115	72781	126218	128387	1258084	1815871	2761690	88856	119767	148172	271246	394189	449478	65333	89349	118403	28107	28017	57078	33560	60871	60592
192	vanillylmandelate (VMA)	Amino Acid	Tyrosine Metabolism	1567	LC/MS Neg	1111	941	197.046	1245	55-10-7	C05584	HMDB00291	378577	390671	321248	414400	639818	372793	822417	784810	492119	563265	686901	323638	733567	824016	481440	864690	1084853	504125	610767	604018	451015	469712	554116	524705
3969	xanthine	Nucleotide	Purine Metabolism, (Hypo)Xanthine/Inosine containing	3147	LC/MS Polar	1004	2023	151.026	1188	69-89-6	C00385	HMDB00292	9206284	7080845	4385848	7825413	8245153	2682798	7861950	5706663	3594093	10123951	7793849	3570740	6313936	10089535	4729975	10837765	12702148	3018146	9034363	7.8219e+06	3921596	7818690	5216156	6004104
3971	xanthosine	Nucleotide	Purine Metabolism, (Hypo)Xanthine/Inosine containing	15136	LC/MS Neg	100000299	1075	283.068	64959	146-80-5	C01762	HMDB00299	130309	79879		142655	137645	35253	205597	114689	46405	95303	79266	21934	128071	97482		202121	183744	13995	94569	70632	22272	70844	50907	59300
262	xanthurenate	Amino Acid	Tryptophan Metabolism	15679	LC/MS Pos Early	100000015	2236	206.045	5699	59-007	C02470	HMDB00881	165453	139908	154229	349470	687240	417904	360112	370820	347696	361300	425417	253902	590557	744217	449069	677879	499646	333851	164478	156356	135784	160299	322985	305536
1803	ximenoylcarnitine (C26:1)*	Lipid	Fatty Acid Metabolism (Acyl Carnitine, Monounsaturated)	57517	LC/MS Pos Late	100015836	1607	538.483					1184318	1065593	1573808	680462	979532	825056	930157	887192	707784	626304	880284	773813	1053793	1574549	1281256	1451084	1523544	1423848	960608	995871	1091386	1316676	1249729	1162181
1203	xylose	Carbohydrate	Pentose Metabolism	15581	LC/MS Polar	826	1727	195.051	135191	609-06-3	C00181	HMDB00098	305132		448029	173850	277222	409783	251946	302014	325124	325805			303683	270242	217575	340670	377498	311157	148832	284467	312749	341763	322740	455049

## Sheet: Mouse plasma
												CLIENT IDENTIFIER	15 CTRL PLASMA	16 CTRL PLASMA	17 CTRL PLASMA	#18 CTRL	#19 CTRL PLASMA	#20 CTRL PLASMA	22 RUN PLASMA	23 RUN PLASMA	#24 RUN	#25 RUN	#26 RUN
												PARENT SAMPLE ID	6703023	6703024	6703025	6703026	6703027	6703028	6703029	6703030	6703031	6703032	6703033
												SAMPLE NAME	PD-UCAM-00085	PD-UCAM-00086	PD-UCAM-00087	PD-UCAM-00088	PD-UCAM-00089	PD-UCAM-00090	PD-UCAM-00091	PD-UCAM-00092	PD-UCAM-00093	PD-UCAM-00094	PD-UCAM-00095
												BOX NUMBER	Box1	Box1	Box1	Box1	Box1	Box1	Box1	Box1	Box1	Box1	Box1
												CLIENT SAMPLE NUMBER	49	50	51	52	53	54	55	56	57	58	59
												GROUP ID	P_Ctrl	P_Ctrl	P_Ctrl	P_Ctrl	P_Ctrl	P_Ctrl	P_Run	P_Run	P_Run	P_Run	P_Run
												GROUP NUMBER	9	9	9	9	9	9	10	10	10	10	10
												SAMPLE AMOUNT	approx 100	approx 100	approx 100	approx 100	approx 100	approx 100	approx 100	approx 100	approx 100	approx 100	approx 100
												SAMPLE BOX LOCATION	A1	A2	A3	A4	A5	A6	A7	A8	A9	B1	B2
												SUBJECT OR ANIMAL ID	15	16	17	18	19	20	22	23	24	25	26
												UNITS	microliters	microliters	microliters	microliters	microliters	microliters	microliters	microliters	microliters	microliters	microliters
												VOLUME EXTRACTED	30	50	10	50	50	50	50	40	40	20	50
PATHWAY SORTORDER	BIOCHEMICAL	SUPER PATHWAY	SUB PATHWAY	COMP ID	PLATFORM	CHEMICAL ID	RI	MASS	PUBCHEM	CAS	KEGG	Group HMDB	mouse plasma control	mouse plasma control	mouse plasma control	mouse plasma control	mouse plasma control	mouse plasma control	mouse plasma run	mouse plasma run	mouse plasma run	mouse plasma run	mouse plasma run
1560	(12 or 13)-methylmyristate (a15:0 or i15:0)	Lipid	Fatty Acid, Branched	38293	LC/MS Neg	100002344	5499	241.217	151014	2485-71-4			3107549	4950857		6384989	5467242	10359442	3467011	2637580	4585623	1.96893e+06	7353184
1565	(14 or 15)-methylpalmitate (a17:0 or i17:0)	Lipid	Fatty Acid, Branched	38768	LC/MS Neg	100002945	5695	269.249					7891980	12060568	3459471	12487090	10148321	13286453	9748713	6313234	8457760	4942208	11850528
1571	(16 or 17)-methylstearate (a19:0 or i19:0)	Lipid	Fatty Acid, Branched	38296	LC/MS Neg	100002356	5993	297.28	3083779	2724-59-6		HMDB37397	1845067	2985117	872577	4923881	3730424	3709646	2059715	1662998	1884695	1302724	3232785
1423	(2 or 3)-decenoate (10:1n7 or n8)	Lipid	Medium Chain Fatty Acid	63436	LC/MS Neg	100021502	4990	169.123					204808	283218	144940	210126	286313	374444	145673	249384	137757	87475	322048
501	(N(1) + N(8))-acetylspermidine	Amino Acid	Polyamine Metabolism	57814	LC/MS Pos Early	100016038	3080	188.176					197397	397898		514871	507532	425391	546710	683894	301212	181579	904078
1829	(R)-3-hydroxybutyrylcarnitine	Lipid	Fatty Acid Metabolism (Acyl Carnitine, Hydroxy)	43264	LC/MS Pos Early	100003926	2400	248.149	53481617			HMDB13127	3792780	4547701	1853774	1822446	4445318	4970499	3038851	7392387	4439635	3404341	11332704
1830	(S)-3-hydroxybutyrylcarnitine	Lipid	Fatty Acid Metabolism (Acyl Carnitine, Hydroxy)	52984	LC/MS Pos Early	100009271	2340	248.149					7135756	6382715	1893778	3975939	4066954	6937933	3106454	4021758	3121449	3203978	5271948
5803	1,2,3-benzenetriol sulfate (2)	Xenobiotics	Chemical	48762	LC/MS Neg	100006374	1709	204.981					801268	842790	219660	623761	388701	480104	406685	298852	2056680	98825	280186
2246	1,2-dilinoleoyl-GPC (18:2/18:2)	Lipid	Phosphatidylcholine (PC)	52603	LC/MS Pos Late	100008903	2006	782.569	5288075	998-06-1		HMDB08138	117884656	165674032	28978608	135372432	137381664	148328240	172412448	85616624	126028600	45734432	82973704
2168	1,2-dipalmitoyl-GPC (16:0/16:0)	Lipid	Phosphatidylcholine (PC)	19130	LC/MS Pos Late	100000657	2365	734.569	452110	63-89-8		HMDB00564	148298656	171226720	43768936	159749904	165484272	185670224	156767584	135324592	137512704	82932216	144881280
2289	1,2-dipalmitoyl-GPE (16:0/16:0)*	Lipid	Phosphatidylethanolamine (PE)	57341	LC/MS Pos Late	100009204	2498	692.523	445468			HMDB08923	489116	505509		449818	573717	564588	464731	182699	267872		329584
2208	1,2-distearoyl-GPC (18:0/18:0)	Lipid	Phosphatidylcholine (PC)	19132	LC/MS Pos Late	100000660	2950	790.632	94190	816-94-4		HMDB08036	6.65614e+06	6930880	2335244	8379197	10797007	11276296	10959597	9675065	10118669	4851240	12893252
1156	1,5-anhydroglucitol (1,5-AG)	Carbohydrate	Glycolysis, Gluconeogenesis, and Pyruvate Metabolism	20675	LC/MS Neg	100000580	802	163.061	64960	154-58-5	C07326	HMDB02712	52527860	58393932	16078893	71471192	88979800	69307152	67260736	59697532	54927908	28479044	57463408
2714	1-(1-enyl-oleoyl)-GPE (P-18:1)*	Lipid	Lysoplasmalogen	44621	LC/MS Neg	100005372	6250	462.299					1265694	1754365	141026	2494574	887591	3947574	1222400	776806	2310089	1359159	1.80952e+06
2691	1-(1-enyl-palmitoyl)-2-arachidonoyl-GPC (P-16:0/20:4)*	Lipid	Plasmalogen	52689	LC/MS Pos Late	100009014	2154	766.574				HMDB11220	6006478	10153242	2506948	12345744	12271472	12838077	11004044	9622610	11747191	6104474	12183283
2683	1-(1-enyl-palmitoyl)-2-arachidonoyl-GPE (P-16:0/20:4)*	Lipid	Plasmalogen	52673	LC/MS Pos Late	100009002	2270	724.528				HMDB11352	11867416	14086023	2707137	12927556	14167731	16091294	12757998	8787424	11492771	6804966	11388477
2692	1-(1-enyl-palmitoyl)-2-linoleoyl-GPC (P-16:0/18:2)*	Lipid	Plasmalogen	52682	LC/MS Pos Late	100009009	2226	742.574				HMDB11211		4.16401e+06	754205	2849262	3423676	3852105	3397970	2537331	4016591	1331297	3348525
2680	1-(1-enyl-palmitoyl)-2-linoleoyl-GPE (P-16:0/18:2)*	Lipid	Plasmalogen	52677	LC/MS Pos Late	100009069	2351	700.528				HMDB11343	757975	1343695	343207	979160	1035142	838854	798230		1280621	373836	1087301
2685	1-(1-enyl-palmitoyl)-2-oleoyl-GPC (P-16:0/18:1)*	Lipid	Plasmalogen	52478	LC/MS Pos Late	100009007	2443	744.59					1331494	1977055	284788	1.96094e+06	2308528	2377842	1680512	1689545	1.8404e+06	575625	1740802
2681	1-(1-enyl-palmitoyl)-2-palmitoyl-GPC (P-16:0/16:0)*	Lipid	Plasmalogen	52716	LC/MS Pos Late	100009162	2454	718.574	11146967			HMDB11206	1833240	2784878	413581	2870173	3181986	3018724	2537842	2269819	2608596	811446	2195642
2711	1-(1-enyl-palmitoyl)-GPC (P-16:0)*	Lipid	Lysoplasmalogen	52474	LC/MS Neg	100002875	6450	554.346	10917802			HMDB10407	262744	434764	52495	520825	424275	468796	408432	253717	366363	113143	365596
2712	1-(1-enyl-palmitoyl)-GPE (P-16:0)*	Lipid	Lysoplasmalogen	39270	LC/MS Pos Late	100003000	1558	438.298					675854	733351	56116	1.03831e+06	663970	1215653	627782	417179	701093	484394	703922
2696	1-(1-enyl-stearoyl)-2-arachidonoyl-GPE (P-18:0/20:4)*	Lipid	Plasmalogen	52475	LC/MS Pos Late	100008999	2511	752.559	9547058			HMDB05779	13940051	18137420	2827752	19493848	20717212	22799940	18258116	13644272	14852094	6948586	18984970
2688	1-(1-enyl-stearoyl)-2-linoleoyl-GPE (P-18:0/18:2)*	Lipid	Plasmalogen	52748	LC/MS Pos Late	100009225	2633	728.559				HMDB11376	3524525	4619310	563315	4401699	4918433	5059775	4483527	2679637	4307377	1648620	4419292
2687	1-(1-enyl-stearoyl)-2-oleoyl-GPE (P-18:0/18:1)	Lipid	Plasmalogen	52614	LC/MS Pos Late	100008919	2950	730.574		144371-68-6		HMDB11375	702856	844138		763357	891105	1063474	742550	482454	673404	295556	842241
2716	1-(1-enyl-stearoyl)-GPE (P-18:0)*	Lipid	Lysoplasmalogen	39271	LC/MS Pos Late	100003001	1649	466.329					341699	468868		563435	474420	664340	476825	280497	332222	187146	446397
2475	1-arachidonoyl-GPA (20:4)	Lipid	Lysophospholipid	46325	LC/MS Neg	100004442	5499	457.236		799268-65-8						106431	104615	144897	75084	94135	137776	113288	167962
2514	1-arachidonoyl-GPC* (20:4)*	Lipid	Lysophospholipid	33228	LC/MS Pos Late	100001551	1460	544.34			C05208	HMDB10395	119095056	219116576	41611856	242968832	223986528	288506688	225028432	187674352	175349376	76064176	222901840
2565	1-arachidonoyl-GPE (20:4n6)*	Lipid	Lysophospholipid	35186	LC/MS Pos Late	100001571	1470	502.293	42607465			HMDB11517	18240980	25706852	5008410	27421442	18838172	26975792	22389198	14894033	15775699	7743341	17334284
2610	1-arachidonoyl-GPI* (20:4)*	Lipid	Lysophospholipid	34214	LC/MS Neg	100001654	5482	619.289				HMDB61690	4407806	10634629	994139	12492108	11018549	14334744	8965800	7427338	6823297	3.26591e+06	9396578
2740	1-arachidonylglycerol (20:4)	Lipid	Monoacylglycerol	34397	LC/MS Neg	100001433	6250	303.233	5282281	35474-99-8	C13857	HMDB11549	359813	560424	167562	670175	467416	793645	382648	730814	1250723	331254	918838
353	1-carboxyethylisoleucine	Amino Acid	Leucine, Isoleucine and Valine Metabolism	62558	LC/MS Neg	100020427	2628	202.108					632946	562655	38242	523331	265360	401640	870529	605204	791994	292639	324243
305	1-carboxyethylleucine	Amino Acid	Leucine, Isoleucine and Valine Metabolism	62559	LC/MS Neg	100020425	2663	202.108					1744837	1328098	130826	1526293	808454	1218637	1.60231e+06	1289360	1915998	501316	662591
139	1-carboxyethylphenylalanine	Amino Acid	Phenylalanine Metabolism	62566	LC/MS Neg	100020419	2844	236.093					1.65165e+06	1335563	102397	1395441	858717	1153704	1.70199e+06	1450507	1350121	651890	693164
157	1-carboxyethyltyrosine	Amino Acid	Tyrosine Metabolism	62564	LC/MS Neg	100020421	1846	252.088					241289	235375		177536	85942	126564	526272	430193	420205	271517	367179
376	1-carboxyethylvaline	Amino Acid	Leucine, Isoleucine and Valine Metabolism	62562	LC/MS Neg	100020423	2008	188.093					4688616	3.89747e+06	288902	3.80507e+06	2279151	3319288	5288235	3664275	4744468	1795303	2142369
2739	1-dihomo-linolenylglycerol (20:3)	Lipid	Monoacylglycerol	48341	LC/MS Neg	100006121	6400	305.249					242757	529256	197256	502790	248312	603108	294725	618785	1188816	331670	538234
2744	1-docosahexaenoylglycerol (22:6)	Lipid	Monoacylglycerol	35153	LC/MS Neg	100001481	6150	309.222				HMDB11587	117187	172484	42635	219391	99049	204120		253164	628139	82849	317578
2528	1-lignoceroyl-GPC (24:0)	Lipid	Lysophospholipid	49617	LC/MS Pos Late	100002873	1907	608.465		325171-59-3		HMDB10405	2961385	4152725	660508	3163914	3575045	4109695	3835727	2927909	3134188	1165621	2933970
2498	1-linolenoyl-GPC (18:3)*	Lipid	Lysophospholipid	45951	LC/MS Pos Late	100005350	1410	518.324				HMDB10388	2477222	3859964	870095	4027561	4302309	4092502	3.3947e+06	2647407	3181397	1171996	2322870
2735	1-linolenoylglycerol (18:3)	Lipid	Monoacylglycerol	34393	LC/MS Neg	100001435	6214	277.217	53480978	124151-74-2		HMDB11569	851960	1793126	441779	1568593	422141	1808000	1101684	1691858	4024044	705504	1519342
2251	1-linoleoyl-2-arachidonoyl-GPC (18:2/20:4n6)*	Lipid	Phosphatidylcholine (PC)	52710	LC/MS Pos Late	100009131	1969	806.569				HMDB08147	51887632	94045456	16004039	89350760	80997512	105718744	90507248	64351504	72140040	26044984	57088300
2339	1-linoleoyl-2-arachidonoyl-GPE (18:2/20:4)*	Lipid	Phosphatidylethanolamine (PE)	53189	LC/MS Pos Late	100009222	2030	764.523				HMDB09102	1669011	1645087	160940	1645583	1793007	1548044	1472442	627676	888660	457586	761802
2247	1-linoleoyl-2-linolenoyl-GPC (18:2/18:3)*	Lipid	Phosphatidylcholine (PC)	53176	LC/MS Pos Late	100009343	1939	780.554				HMDB08141	3413582	5572331	913161	4955880	4681006	5225548	5607530	1635509	3960496	1423324	1735795
2470	1-linoleoyl-GPA (18:2)*	Lipid	Lysophospholipid	52690	LC/MS Neg	100009082	5483	433.236				HMDB07856	144891	141259	54170	221225	203282	230681	161515	173714	241213	186283	221933
2496	1-linoleoyl-GPC (18:2)	Lipid	Lysophospholipid	34419	LC/MS Pos Late	100001395	1465	520.34	11988421		C04100	HMDB10386	277540576	489689760	95930960	459149312	446822656	528329216	413948768	272455392	369244960	136975200	302441600
2552	1-linoleoyl-GPE (18:2)*	Lipid	Lysophospholipid	36600	LC/MS Pos Late	100001570	1482	478.293	52925130			HMDB11507	9936515	16979812	2826570	17444472	12682527	15157821	13153525	7433931	10909165	3359106	8798013
2594	1-linoleoyl-GPG (18:2)*	Lipid	Lysophospholipid	54885	LC/MS Neg	100009227	5516	507.273					681170	1361128	99541	1583340	1.04367e+06	1454998	1092072	982094	764242	346590	630623
2604	1-linoleoyl-GPI* (18:2)*	Lipid	Lysophospholipid	36594	LC/MS Neg	100001778	5494	595.289					892179	2082395	180727	1816987	1572645	2078557	1.70289e+06	1123546	1278379	504757	1218239
2734	1-linoleoylglycerol (18:2)	Lipid	Monoacylglycerol	27447	LC/MS Neg	100001040	6477	279.233	5283469	2277-28-3			38181712	72125296	20172044	64189540	32084064	68478496	49469488	79542488	160670976	33027470	63507720
86	1-methyl-4-imidazoleacetate	Amino Acid	Histidine Metabolism	32350	LC/MS Pos Early	100001208	2064	141.066	75810	2625-49-2	C05828	HMDB02820	4.09207e+06	4665821	1003284	4473088	5560248	3833441	4612118	5406197	4894659	3669334	11382905
87	1-methyl-5-imidazoleacetate	Amino Acid	Histidine Metabolism	62946	LC/MS Pos Early	100002910	1989	141.066	6451814	4200-48-0		HMDB04988	550770	850905	182110	952012	934906	895653	773231	1435075	874437	650029	1371144
85	1-methylhistamine	Amino Acid	Histidine Metabolism	43831	LC/MS Pos Early	100001204	3040	126.103	3614	501-75-7	C05127	HMDB00898	2409897	2069656	287715	2776367	2293621	3404437	1857526	2452705	2169509	1625662	2134355
68	1-methylhistidine	Amino Acid	Histidine Metabolism	30460	LC/MS Pos Early	100001051	2755	170.092	92105	332-80-9	C01152	HMDB00001	8230231	12205514	2146394	14381281	10804816	14953541	10594440	8.08583e+06	11437568	5.41779e+06	12876350
4156	1-methylnicotinamide	Cofactors and Vitamins	Nicotinate and Nicotinamide Metabolism	27665	LC/MS Pos Early	55	1940	137.071	457	1005-24-9	C02918	HMDB00699	2135531	4097406	452414	3524274	2584258	2747224	2502852	2547786	3832761	1838428	3951571
2156	1-myristoyl-2-arachidonoyl-GPC (14:0/20:4)*	Lipid	Phosphatidylcholine (PC)	53195	LC/MS Pos Late	100009139	1914	754.538				HMDB07883	1544737	2736049	452903	2459501	2071549	4123971	3288649	2341840	1972003	839599	2023485
2152	1-myristoyl-2-palmitoyl-GPC (14:0/16:0)	Lipid	Phosphatidylcholine (PC)	19258	LC/MS Pos Late	100000672	2147	706.538	129657	69525-80-0		HMDB07869	1869547	2337993		2258166	2010693	3494504	2848036	2015209	1836263	952791	2471473
2726	1-myristoylglycerol (14:0)	Lipid	Monoacylglycerol	35625	LC/MS Neg	100001618	6353.3	227.202	79050	75685-84-6	C01885	HMDB11561	592298	770385	548708	642583		781914	864975	835674	1642925	417011	657681
2332	1-oleoyl-2-arachidonoyl-GPE (18:1/20:4)*	Lipid	Phosphatidylethanolamine (PE)	55041	LC/MS Pos Late	100009219	2200	766.538				HMDB09069	16841494	22754796	3270307	20705652	19963616	23645444	19555762	12855270	13150806	6181193	14613943
2444	1-oleoyl-2-arachidonoyl-GPI (18:1/20:4)*	Lipid	Phosphatidylinositol (PI)	54994	LC/MS Polar	100010951	922	883.534					775484	1620683	359388	1467281	1011257	1519286	1147826	1205837	980403	526612	967491
2245	1-oleoyl-2-docosahexaenoyl-GPC (18:1/22:6)*	Lipid	Phosphatidylcholine (PC)	52697	LC/MS Pos Late	100009130	2011	832.585				HMDB08123	100103456	174364592	32436260	137463152	106528512	189741776	150654736	112815544	117599920	54907184	109118488
2336	1-oleoyl-2-docosahexaenoyl-GPE (18:1/22:6)*	Lipid	Phosphatidylethanolamine (PE)	53209	LC/MS Pos Late	100009220	2119	790.538					6731724	8853536	1236132	7257160	7.61848e+06	9231872	8424798	4.08066e+06	4989157	1812473	5194400
2235	1-oleoyl-2-linoleoyl-GPC (18:1/18:2)*	Lipid	Phosphatidylcholine (PC)	52453	LC/MS Pos Late	100008981	2165	784.585					268801152	421351008	118749824	324190304	280592128	389307200	342810752	261074688	290774368	185018352	230718064
2329	1-oleoyl-2-linoleoyl-GPE (18:1/18:2)*	Lipid	Phosphatidylethanolamine (PE)	52687	LC/MS Pos Late	100009078	2270	742.538	9546753			HMDB05349	6473251	11641451	1560937	8.18842e+06	8985422	6936052	7820629	3442720	5191093	1672781	3852898
2493	1-oleoyl-GPC (18:1)	Lipid	Lysophospholipid	48258	LC/MS Pos Late	100001272	1540	522.355	16081932	19420-56-5		HMDB02815	163494192	330246016	42576604	254029296	207333760	321756576	269088416	191894656	204846832	84757008	181931296
2550	1-oleoyl-GPE (18:1)	Lipid	Lysophospholipid	35628	LC/MS Pos Late	100001569	1554	480.308	9547071	89576-29-4		HMDB11506	4428450	7665504	700173	6.53008e+06	4937429	7297654	5384306	3133900	3992647	1292763	2978211
2592	1-oleoyl-GPG (18:1)*	Lipid	Lysophospholipid	45968	LC/MS Neg	100005716	5610	509.288					457755	867602	88263	918178	407321	942638	517187	443642	436576	237754	506356
2602	1-oleoyl-GPI (18:1)	Lipid	Lysophospholipid	36602	LC/MS Neg	100001777	5599	597.304					298777	508762		567859	302468	738502	333500	255103	347839	204305	402338
2733	1-oleoylglycerol (18:1)	Lipid	Monoacylglycerol	21184	LC/MS Neg	100000924	6650	281.249	5283468	111-03-5		HMDB11567	26474416	57355020	17198666	42701240	19443108	62497804	46836072	67934400	125180304	28610118	55515356
2198	1-palmitoleoyl-2-linoleoyl-GPC (16:1/18:2)*	Lipid	Phosphatidylcholine (PC)	52683	LC/MS Pos Late	100009075	2003	756.554				HMDB08006	50320904	108034496	17131092	85076928	58498792	112993544	93669840	58898352	68436256	27486296	55455760
2484	1-palmitoleoyl-GPC* (16:1)*	Lipid	Lysophospholipid	33230	LC/MS Pos Late	100001511	1450	494.324	24779461			HMDB10383	16730843	38608444	4379699	30664884	18161850	37904540	30011436	18686322	19911024	7576149	15721525
2730	1-palmitoleoylglycerol (16:1)*	Lipid	Monoacylglycerol	52431	LC/MS Neg	100008952	6094	253.217					2763835	6741141	1626994	3756545	1246808	6.59748e+06	4690447	6395991	12968949	2335475	5503372
2186	1-palmitoyl-2-arachidonoyl-GPC (16:0/20:4n6)	Lipid	Phosphatidylcholine (PC)	52462	LC/MS Pos Late	100008914	2091	782.569	10747814	35418-58-7		HMDB07982	840202624	1104945664	332150368	1180801920	1217992320	1377473664	1245097728	994227328	1012261696	606086400	1120559360
2301	1-palmitoyl-2-arachidonoyl-GPE (16:0/20:4)*	Lipid	Phosphatidylethanolamine (PE)	52464	LC/MS Pos Late	100008990	2198	740.523	9546800			HMDB05323	16680474	22014218	3505850	21957938	21098124	22133580	22633140	12986242	15201738	5244561	16412748
2423	1-palmitoyl-2-arachidonoyl-GPI (16:0/20:4)*	Lipid	Phosphatidylinositol (PI)	52467	LC/MS Pos Late	100008993	2567	876.56				HMDB09789	14211854	22093524	3006796	21621630	18762304	29276692	23960494	14183071	19621756	5510318	18689764
2182	1-palmitoyl-2-dihomo-linolenoyl-GPC (16:0/20:3n3 or 6)*	Lipid	Phosphatidylcholine (PC)	52454	LC/MS Pos Late	100008985	2199	784.585					240562544	370945536	64375740	345715488	266569584	417390560	361372544	240754528	279705920	127367528	292841408
2192	1-palmitoyl-2-docosahexaenoyl-GPC (16:0/22:6)	Lipid	Phosphatidylcholine (PC)	52610	LC/MS Pos Late	100008915	2023	806.569	6441886	59403-54-2		HMDB07991	626028096	772286336	227180624	794134400	765497920	947696576	900016128	652446016	701999808	338306784	682676736
2303	1-palmitoyl-2-docosahexaenoyl-GPE (16:0/22:6)*	Lipid	Phosphatidylethanolamine (PE)	52465	LC/MS Pos Late	100008991	2119	764.523	9546799			HMDB05324	23248076	30478350	5709751	28163306	29720294	33393034	35784992	17588836	22677404	6596993	24256470
2178	1-palmitoyl-2-gamma-linolenoyl-GPC (16:0/18:3n6)*	Lipid	Phosphatidylcholine (PC)	54812	LC/MS Pos Late	100009154	2034	756.554				HMDB07974	12179076	16441183	4.18847e+06	20516074	23251850	22220796	21210190	13831586	15903068	6507292	13496923
2175	1-palmitoyl-2-linoleoyl-GPC (16:0/18:2)	Lipid	Phosphatidylcholine (PC)	42446	LC/MS Pos Late	1537	2160	758.569	5287971	40811-94-7		HMDB07973	1596556416	1791366528	746572032	1784736512	1875342080	2000725632	1986398336	1531790080	1692304640	1115100672	1572365312
2295	1-palmitoyl-2-linoleoyl-GPE (16:0/18:2)	Lipid	Phosphatidylethanolamine (PE)	42449	LC/MS Pos Late	100001870	2275	716.523	9546747			HMDB05322	10727341	13611057	2639476	11892614	11305797	10348557	12971493	5.95708e+06	8642630	2773594	7471218
2420	1-palmitoyl-2-linoleoyl-GPI (16:0/18:2)	Lipid	Phosphatidylinositol (PI)	52450	LC/MS Polar	1528	910	833.519				HMDB09784	1238148	914119	364956	1125099	1118238	1434748	1452578	1163495	1301434	548118	1075616
2172	1-palmitoyl-2-oleoyl-GPC (16:0/18:1)	Lipid	Phosphatidylcholine (PC)	52461	LC/MS Pos Late	1539	2358	760.585	6436017	26853-31-6;26853-31-6		HMDB07972	722610880	1095005312	212991664	873898304	719868800	1121650688	1055585472	754579264	834765888	386345568	807429184
2293	1-palmitoyl-2-oleoyl-GPE (16:0/18:1)	Lipid	Phosphatidylethanolamine (PE)	19263	LC/MS Pos Late	1526	2509	718.538	5283496	26662-94-2		HMDB05320	5888129	7357147	899138	5664896	5198235	6.6058e+06	7211061	3.55916e+06	4009660	1.71275e+06	4244574
2418	1-palmitoyl-2-oleoyl-GPI (16:0/18:1)*	Lipid	Phosphatidylinositol (PI)	52669	LC/MS Polar	100009066	893	835.534				HMDB09783	351436	185900	69612	314714	303183	357411	406948	317561	328850	153758	289612
2169	1-palmitoyl-2-palmitoleoyl-GPC (16:0/16:1)*	Lipid	Phosphatidylcholine (PC)	52470	LC/MS Pos Late	100008984	2160	732.554					24269494	44700208	9256960	35208640	23556688	53902244	47187560	29967918	32019136	16171709	34573508
2170	1-palmitoyl-2-stearoyl-GPC (16:0/18:0)	Lipid	Phosphatidylcholine (PC)	52616	LC/MS Pos Late	100008921	2653	762.601		59403-51-9		HMDB07970	48418112	60547848	14867624	59516188	67523216	75441360	71415792	54055548	59324252	28506118	67369176
2465	1-palmitoyl-GPA (16:0)	Lipid	Lysophospholipid	34428	LC/MS Neg	100001445	5600	409.236	6419701	17618-08-5	C04036	HMDB00327	90138	72597	40355	112395	127183	101100	83694	91699	122344	121101	80289
2482	1-palmitoyl-GPC (16:0)	Lipid	Lysophospholipid	33955	LC/MS Pos Late	100001263	1525	496.34	86554	17364-16-8		HMDB10382	790990784	1068948480	232149408	949736192	944881344	1040426752	1054657280	821603392	853366656	438085440	776124608
2541	1-palmitoyl-GPE (16:0)	Lipid	Lysophospholipid	35631	LC/MS Pos Late	100001567	1544	454.293	9547069	53862-35-4		HMDB11503	9105943	11828852	2201518	12260668	11341657	13288288	11764238	7.19069e+06	8214940	3573219	7863671
2587	1-palmitoyl-GPG (16:0)*	Lipid	Lysophospholipid	45970	LC/MS Neg	100005717	5570	483.273	3300276				222460	321067		334147	201349	339592	279005	204567	186686	100678	148672
2596	1-palmitoyl-GPI* (16:0)	Lipid	Lysophospholipid	35305	LC/MS Neg	100001655	5564	571.289				HMDB61695	396848	776940	34726	725747	566138	777714	572214	298842	410375	207670	594264
2728	1-pentadecanoylglycerol (15:0)	Lipid	Monoacylglycerol	47898	LC/MS Neg	100001431	6200	241.217	190750	104140-07-0			120959	240675		223857		260326	130062	212142	534640	113385	247588
90	1-ribosyl-imidazoleacetate*	Amino Acid	Histidine Metabolism	61868	LC/MS Pos Early	100001668	2006	259.092	5117448	29605-99-0	C05131	HMDB02331	5908842	9695425	883590	8104877	9240412	7177316	12293924	11688017	5876582	6519541	14850857
2376	1-stearoyl-2-arachidonoyl-glycosyl-GPE (18:0/20:4)	Lipid	Glycosyl PE	63193	LC/MS Pos Late	100021404	2423	930.607					502552			216340		236002	512635	184687	536931		134428
2220	1-stearoyl-2-arachidonoyl-GPC (18:0/20:4)	Lipid	Phosphatidylcholine (PC)	42450	LC/MS Pos Late	100001869	2300	810.601	16219824	35418-59-8		HMDB08048	847192192	1011848960	349394112	1274837376	1321149824	1495972352	1408543488	1092308864	1131023360	607414080	1387282304
2323	1-stearoyl-2-arachidonoyl-GPE (18:0/20:4)	Lipid	Phosphatidylethanolamine (PE)	52447	LC/MS Pos Late	100008977	2424	768.554	5289133			HMDB09003	41298580	51891968	9692792	67180200	59769276	63417876	64483860	36226700	46985556	15455787	58063044
2439	1-stearoyl-2-arachidonoyl-GPI (18:0/20:4)	Lipid	Phosphatidylinositol (PI)	52449	LC/MS Pos Late	100000616	3000	904.591		383907-33-3		HMDB09815	141413728	185139136	31288864	219730160	196360832	250350416	209320464	160923488	174432736	82534352	203481872
2226	1-stearoyl-2-docosahexaenoyl-GPC (18:0/22:6)	Lipid	Phosphatidylcholine (PC)	52611	LC/MS Pos Late	100008916	2197	834.601		59403-52-0		HMDB08057	300287488	290884864	97274056	370049824	393184192	475558752	478389280	323002144	387321792	161888176	418341408
2327	1-stearoyl-2-docosahexaenoyl-GPE (18:0/22:6)*	Lipid	Phosphatidylethanolamine (PE)	52466	LC/MS Pos Late	100008992	2317	792.554	9546798			HMDB05334	13113282	18241116	3124084		15105259	17395520	17446308		13311695	5455968	12726797
2212	1-stearoyl-2-linoleoyl-GPC (18:0/18:2)*	Lipid	Phosphatidylcholine (PC)	52452	LC/MS Pos Late	100008980	2380	786.601					1436505984	1678224000	569911360	1703761024	1743378304	1964321408	1881632640	1390121088	1689743104	865093056	1589185408
2314	1-stearoyl-2-linoleoyl-GPE (18:0/18:2)*	Lipid	Phosphatidylethanolamine (PE)	52446	LC/MS Pos Late	100008976	2522	744.554	9546749			HMDB08994	26880240	38049432	5372816	37816228	31539446	31924214	41415244	15219086	27893808	6688406	27069800
2427	1-stearoyl-2-linoleoyl-GPI (18:0/18:2)	Lipid	Phosphatidylinositol (PI)	52468	LC/MS Pos Late	100008994	3185	880.591				HMDB09809	8142824	13491954	1414177	8528024	9075693	10433034	10942936	5943566	9632024	2428206	7547838
2209	1-stearoyl-2-oleoyl-GPC (18:0/18:1)	Lipid	Phosphatidylcholine (PC)	52438	LC/MS Pos Late	100008904	2644	788.616		56421-10-4		HMDB08038	173164336	262373904	52468324	228103680	199299488	305254080	310238592	187494336	230099472	91526752	257776000
2310	1-stearoyl-2-oleoyl-GPE (18:0/18:1)	Lipid	Phosphatidylethanolamine (PE)	42448	LC/MS Pos Late	100001856	2858	746.569				HMDB08993	2847802	4.18636e+06	500929	3.66734e+06	2864611	3989634	4169969	1797306	3051278	968155	3359633
2411	1-stearoyl-2-oleoyl-GPG (18:0/18:1)	Lipid	Phosphatidylglycerol (PG)	52623	LC/MS Polar	100001866	717	775.549		322647-48-3			324285	468445	84989	475903	650242	354465	480178	324573	330665	125705	391971
2491	1-stearoyl-GPC (18:0)	Lipid	Lysophospholipid	33961	LC/MS Pos Late	100001271	1606	524.371	497299	19420-57-6		HMDB10384	455222208	557122688	150589632	660761536	675381184	699102400	694892096	528750752	584057792	284130272	566644224
2548	1-stearoyl-GPE (18:0)	Lipid	Lysophospholipid	42398	LC/MS Pos Late	100001461	1626	482.324	9547068	69747-55-3		HMDB11130	11185806	13678370	2732294	17929434	16690080	17535320	16549351	10002573	11823643	5301375	12909131
2590	1-stearoyl-GPG (18:0)	Lipid	Lysophospholipid	34437	LC/MS Neg	100001462	5816	511.304					170306	233186	21425	292520	232141	264817	271660	165475	228515	36683	148811
2600	1-stearoyl-GPI (18:0)	Lipid	Lysophospholipid	19324	LC/MS Neg	100000656	5794	599.32		796963-93-4		HMDB61696	2113107	3332548	587302	4703117	4291860	4.0092e+06	2960520	2095301	2612102	1735938	4986832
1456	10-heptadecenoate (17:1n7)	Lipid	Long Chain Monounsaturated Fatty Acid	33971	LC/MS Neg	100001278	5555	267.233	5312435	29743-97-3		HMDB60038	20293124	41118720	4953565	27432080	21414468	39535736	30624292	14617600	25834980	8465050	29558992
1465	10-nonadecenoate (19:1n9)	Lipid	Long Chain Monounsaturated Fatty Acid	33972	LC/MS Neg	100001277	5780	295.264	5312513	73033-09-7		HMDB13622	7804898	15696059	2008759	12201443	10026883	15222992	11321239	6057721	10135910	3218850	11870988
1425	10-undecenoate (11:1n1)	Lipid	Medium Chain Fatty Acid	32497	LC/MS Neg	100001197	5085.8	183.139	14891	1333-28-4	C13910	HMDB33724	1987679	3084617	1250450	1722845	4135779	2593551	2416579	2785740	3062495	1493192	3728438
1936	12,13-DiHOME	Lipid	Fatty Acid, Dihydroxy	38395	LC/MS Neg	62	5137	313.238	10236635	263399-35-5	C14829	HMDB04705	3548689	5482354	1202388	6291595	5410492	6668179	7103950	2608111	1948487	1516913	4195546
2027	12-HEPE	Lipid	Eicosanoid	46293	LC/MS Neg	100002165	5265	317.212	10041593	81187-21-5		HMDB10202	4182247	2630197	514620	6884637	1330028	6943615	2213905	716700	4250179	2821480	2020854
2036	12-HETE	Lipid	Eicosanoid	37536	LC/MS Pos Late	100002167	1408	303.232	5312983	71030-37-0;73837-14-6		HMDB06111	14781890	9844737	2268309	21001816	3365934	31643960	7393977	3032991	19674468	16348292	8924786
2043	12-HHTrE	Lipid	Eicosanoid	57393	LC/MS Neg	1261	5175	279.197	5283141	54397-84-1	C20388	HMDB12535	349462	367739	73810	378672	154565	641347	200644	121621	517715	520680	297594
1920	13-HODE + 9-HODE	Lipid	Fatty Acid, Monohydroxy	37752	LC/MS Neg	100002196	5275	295.228					15533396	27863832	2975771	35922492	11469034	33964608	26319776	7171021	14819145	8161335	19396180
1968	14-HDoHE/17-HDoHE	Lipid	Docosanoid	53034	LC/MS Neg	100009278	5296	343.228					8.21871e+06	6.30459e+06	1146744	14222969	3074644	19410284	4875123	1534198	10421528	5313471	3858827
1916	16-hydroxypalmitate	Lipid	Fatty Acid, Monohydroxy	39609	LC/MS Neg	100002953	5236.2	271.228	10466	506-13-8	C18218	HMDB06294	3361626	2980977	830924	2528660	4167303	3792061	2365731	2809782	976298	1409265	4666747
1576	18-methylnonadecanoate (i20:0)	Lipid	Fatty Acid, Branched	62781	LC/MS Neg	100019953	6170	311.296	4383090				598068	793060	279347	3652483	1225614	1068252	463781	535816	435246	395855	1036864
4106	2'-deoxycytidine	Nucleotide	Pyrimidine Metabolism, Cytidine containing	15949	LC/MS Pos Early	100000125	2193	228.098	13711	951-77-9	C00881	HMDB00014	4705172	8510585	1581398	7280257	6229825	7469698	7547209	7091175	6443796	4353893	7681075
4081	2'-deoxyuridine	Nucleotide	Pyrimidine Metabolism, Uracil containing	52602	LC/MS Neg	536	1586	227.067	13712	951-78-0	C00526	HMDB00012	1181689	1.92646e+06	574708	2099007	1781559	1524952	1.89035e+06	1545130	2440918	996584	2220469
4107	2'-O-methylcytidine	Nucleotide	Pyrimidine Metabolism, Cytidine containing	57554	LC/MS Pos Early	100010895	2411	258.108	150971	2140-72-9			578235	1.03236e+06	95073	738560	628450	671996	1.03751e+06	940885	948486	487469	956808
4069	2'-O-methyluridine	Nucleotide	Pyrimidine Metabolism, Uracil containing	57655	LC/MS Neg	100010896	1831	257.078	102212	2140-76-3			106260	171087	30864	90906	94312	83165	206904	102119	210083	57329	109054
384	2,3-dihydroxy-2-methylbutyrate	Amino Acid	Leucine, Isoleucine and Valine Metabolism	57547	LC/MS Neg	100010869	787	133.051	301941	14868-24-7		HMDB29576	191479	461237	53054	293523	284492	308430	380947	197788	338350	156671	376339
403	2,3-dihydroxy-5-methylthio-4-pentenoate (DMTPA)*	Amino Acid	Methionine, Cysteine, SAM and Taurine Metabolism	62805	LC/MS Neg	100020893	1156	177.023					615338	1103008	153822	871526	884040	833822	1285926	992349	971521	577195	1120429
5763	2,4-di-tert-butylphenol	Xenobiotics	Chemical	64328	LC/MS Neg	100021918	5749	205.16		96-76-4			11048949	27629404	3716475	33220536	26471712	38305820	36900304	19969764	21210124	7979127	24654884
5593	2,6-dihydroxybenzoic acid	Xenobiotics	Drug - Topical Agents	63042	LC/MS Polar	100020837	729	153.019	9338	303-07-1		HMDB13676	10353384	11243002	1675633	2682147	2968255	3441585	7001999	5705573	10084213	3144563	6.37459e+06
4395	2-(4-hydroxyphenyl)propionate	Xenobiotics	Benzoate Metabolism	35632	LC/MS Neg	100001622	1797.3	165.056	102526	938-96-5	C03080	HMDB41683	88706	126719		73454	101744	67114	172707	131628	105078	75823	96574
4379	2-amino-p-cresol sulfate	Xenobiotics	Benzoate Metabolism	37180	LC/MS Neg	100001801	2320	202.018						257196	173704	564830	490446	53040	328273	490947	261660	225838	527187
116	2-aminoadipate	Amino Acid	Lysine Metabolism	6146	LC/MS Polar	381	3500	160.061	469	542-32-5;1118-90-7	C00956	HMDB00510	150249	348438		206909	146263	200435	248037	174007	360945		240784
1673	2-aminoheptanoate	Lipid	Fatty Acid, Amino	43761	LC/MS Pos Early	100004542	3160	146.118	227939	1115-90-8			428758	875874		518012	463650	846299	389084	301197	619678	157178	470694
1678	2-aminooctanoate	Lipid	Fatty Acid, Amino	43343	LC/MS Pos Late	100004227	750	160.133	69522	644-90-6		HMDB00991		127220		76356		158379	103988	112295	143730	51005	134566
5026	2-aminophenol sulfate	Xenobiotics	Food Component/Plant	43266	LC/MS Neg	100004322	1677	188.002	181670			HMDB61116	14210159	12253640	2176342	1759058	9443102	3185082	9525618	14073502	8515126	6.47406e+06	10735396
2751	2-arachidonoylglycerol (20:4)	Lipid	Monoacylglycerol	19266	LC/MS Neg	100000584	6170	303.233	5282280	53847-30-6	C13856	HMDB04666	314269	116298	76203	202421	208791	161303	154738	188460	244226	58138	114570
1746	2-butenoylglycine	Lipid	Fatty Acid Metabolism (Acyl Glycine)	61785	LC/MS Neg	100016110	1380	142.051	6303498	71428-89-2			79681	207168	72378	98569	168230	119387	228852	242582	221491	161327	653739
355	2-hydroxy-3-methylvalerate	Amino Acid	Leucine, Isoleucine and Valine Metabolism	36746	LC/MS Neg	100001541	1800	131.071	164623	488-15-3		HMDB00317	545881	714617	72630	400020	292756	290362	474956	291639	691026	166509	479684
1590	2-hydroxyadipate	Lipid	Fatty Acid, Dicarboxylate	31934	LC/MS Polar	100001153	3000	161.046	193530	18294-85-4	C02360	HMDB00321	439688	646416		674696	365048	432436	711737	678031	1925741	372037	902517
1879	2-hydroxyarachidate*	Lipid	Fatty Acid, Monohydroxy	61700	LC/MS Neg	100019892	5990	327.291	5225199				198929	300609	157055	285165	231575	295229	254070	237088	153329	173593	313827
533	2-hydroxybutyrate/2-hydroxyisobutyrate	Amino Acid	Glutathione Metabolism	52281	LC/MS Polar	100008928	1258	103.04					4554453	10389453	2219228	7362152	9924861	8210160	12733108	14195179	9112210	7205306	20241256
1871	2-hydroxydecanoate	Lipid	Fatty Acid, Monohydroxy	42489	LC/MS Neg	100004089	4840	187.134	21488	5393-81-7			320178	448857	114489	623248	575504	583455	297437	309012	296984	166869	358571
1586	2-hydroxyglutarate	Lipid	Fatty Acid, Dicarboxylate	52294	LC/MS Pos Early	100002070	958	166.071	43	40951-21-1	C02630	HMDB0059655	441437	626414	255246	417576	386042	467029	726073	769428	659262	490703	811668
4298	2-hydroxyhippurate (salicylurate)	Xenobiotics	Benzoate Metabolism	18281	LC/MS Neg	1869	2184	194.046	10253	487-54-7	C07588	HMDB00840	452378	47412	45095		21350	337245	174289	27396	1165081	24473	73101
1869	2-hydroxyoctanoate	Lipid	Fatty Acid, Monohydroxy	22036	LC/MS Neg	100000743	3736.8	159.103	94180	617-73-2		HMDB02264	177996	258747	40609	243421	205958	202291	221010	241466	210848	138713	231595
1876	2-hydroxyoleate	Lipid	Fatty Acid, Monohydroxy	54920	LC/MS Neg	100010866	5560	297.243	9796304	56472-29-8			2418734	2803555	247333		2488422	3734891	1821375	2.82558e+06	839744	755896	2.76998e+06
1874	2-hydroxypalmitate	Lipid	Fatty Acid, Monohydroxy	35675	LC/MS Neg	100001579	5511.2	271.228	92836	764-67-0		HMDB31057	15148010	16568139	2967266	16832910	14847335	18384606	11898471	10885772	9619764	6178876	9445323
149	2-hydroxyphenylacetate	Amino Acid	Phenylalanine Metabolism	1432	LC/MS Polar	235	858.6	151.04	11970	614-75-5	C05852	HMDB00669	703898	977702		846963	692632	684860	1024501	452732	1401626	623561	866521
1632	2-hydroxysebacate	Lipid	Fatty Acid, Dicarboxylate	63357	LC/MS Neg	100020378	1324	217.108	128458	103963-71-9		HMDB00424	1978329	3252070	304633	2529593	2704988	1783706	1204446	1504362	2626157	746804	3403968
1877	2-hydroxystearate	Lipid	Fatty Acid, Monohydroxy	17945	LC/MS Neg	1239	5695	299.259	69417	629-22-1	C03045		4402664	7137079	1580972	8609011	6840401	9307771	6253199	4803285	5147154	2573888	4947853
4571	2-isopropylmalate	Xenobiotics	Food Component/Plant	15667	LC/MS Polar	100000409	2605	175.061	77	3237-44-3	C02504	HMDB00402	1231066	788103		222613	254602	410210	912065	585353	1128045	341963	285587
2750	2-linoleoylglycerol (18:2)	Lipid	Monoacylglycerol	32506	LC/MS Neg	100000987	6250	279.233	5365676	3443-82-1		HMDB11538	40674528	10898424	4787070	7642362	3595276	9945716	10928410	18986068	30519138	4922435	6877668
4406	2-methoxyhydroquinone sulfate (1)	Xenobiotics	Benzoate Metabolism	64049	LC/MS Neg	100021839	1505	218.997					742845	1358611	136856	1126514	587472	1523089	1167830	1204506	1285685	1044116	3.51879e+06
4407	2-methoxyhydroquinone sulfate (2)	Xenobiotics	Benzoate Metabolism	64050	LC/MS Neg	100021840	1619	218.997					138815	345035	55432	315530	248166	619503	404012	275044	424199	288406	972890
357	2-methylbutyrylcarnitine (C5)	Amino Acid	Leucine, Isoleucine and Valine Metabolism	45095	LC/MS Pos Early	100001509	3050	246.17	6426901	31023-25-3		HMDB00378	1392263	1741287		1289129	1640591	2411714	872687	2.07863e+06	1404729	938433	1.62684e+06
359	2-methylbutyrylglycine (C5)	Amino Acid	Leucine, Isoleucine and Valine Metabolism	31928	LC/MS Neg	100001155	1884	158.082	193872	52320-67-9		HMDB00339	13897			33577			37841	77903	136561	66280	83519
1391	2-methylcitrate/homocitrate	Energy	TCA Cycle	52282	LC/MS Neg	100008929	575	205.035					469661	800358	148621	750453	545026	561771	606254	648834	1.23504e+06	353983	627542
5762	2-naphthol sulfate	Xenobiotics	Chemical	62520	LC/MS Neg	100020515	3658	223.007	74428				381587	743005	63661	253925	135310	207544	265164	524715	357078	200635	906397
4189	2-O-methylascorbic acid	Cofactors and Vitamins	Ascorbate and Aldarate Metabolism	63990	LC/MS Polar	100003258	1512	189.041	99779	17860-87-6			3173079	5995187	761695	4550592	4786161	5390454	7.21141e+06	5945858	5485497	2821151	7092232
2749	2-oleoylglycerol (18:1)	Lipid	Monoacylglycerol	21232	LC/MS Neg	100000943	6500	281.249	5319879	3443-84-3		HMDB11537	30275790	9266344	4902704	5332412	2352107	10961907	9592769	16965840	26795070	4969791	5950386
4572	2-oxindole-3-acetate	Xenobiotics	Food Component/Plant	40479	LC/MS Neg	100003109	2076	190.051	3080590	2971-31-5		HMDB35514	58366	75401		101415	56979	40314	89112	43305	108209	17637	65014
118	2-oxoadipate	Amino Acid	Lysine Metabolism	38347	LC/MS Polar	92	2635	159.03	71	3184-35-8	C00322	HMDB00225	744055	2739917	178633	1036889	973479	1164648	2856887	2235247	3933755	1.04693e+06	3654945
444	2-oxoarginine*	Amino Acid	Urea cycle; Arginine and Proline Metabolism	55072	LC/MS Pos Early	100002784	1760	174.087	558	3715-10-04	C03771	HMDB04225	2312475	3366829	304255	2218601	2.05892e+06	2631566	2910557	2555608	1991731	1361749	2.46786e+06
2485	2-palmitoleoyl-GPC* (16:1)*	Lipid	Lysophospholipid	35819	LC/MS Pos Late	100001561	1425	494.324				HMDB10383	1083612	2235458	340760	1777393	1123006	2447260	1.64599e+06	1083338	1428211	570233	1006311
2747	2-palmitoleoylglycerol (16:1)*	Lipid	Monoacylglycerol	52432	LC/MS Neg	100008953	6016	253.217					2724702	961998	583761	486439	558113	1282380	969926	1268614	2591292	392760	331792
2483	2-palmitoyl-GPC* (16:0)*	Lipid	Lysophospholipid	35253	LC/MS Neg	100001562	6215	570.341	15061532			HMDB61702	24877740	38755772	7062427	40238332	33569924	40176572	38427436	27675320	31043872	13958141	28801742
2549	2-stearoyl-GPE (18:0)*	Lipid	Lysophospholipid	41220	LC/MS Neg	100003901	6350	480.31				HMDB11129	2869682	4029084	799675	5761098	4880752	5516586	5138320	3379619	3762012	1677034	3903520
1940	2R,3R-dihydroxybutyrate	Lipid	Fatty Acid, Dihydroxy	63109	LC/MS Polar	100002367	1543	119.035	13120901	759-06-8		HMDB00498	10408183	17487246	3.40014e+06	9438527	12763487	12288901	18354190	11300958	16640455	7.30659e+06	14561757
1939	2S,3R-dihydroxybutyrate	Lipid	Fatty Acid, Dihydroxy	62950	LC/MS Polar	100002284	1660	119.035	10964471	5057-93-2		HMDB02453	2613553	4259190	964939	2648553	3.15491e+06	728989	4188130	1763700	3523431	817452	3628147
1943	3,4-dihydroxybutyrate	Lipid	Fatty Acid, Dihydroxy	62952	LC/MS Polar	100001730	2204	119.035		51267-44-8			2477475	4083125	920527	2717504	3342470	4.01497e+06	4101330	3061567	3294100	1549083	3658566
4396	3-(3-hydroxyphenyl)propionate	Xenobiotics	Benzoate Metabolism	35635	LC/MS Neg	100001624	1980	165.056	91	621-54-5	C11457	HMDB00375	121993	173958		135222	214509	135222	45362	93110	25274	65980	54757
4393	3-(3-hydroxyphenyl)propionate sulfate	Xenobiotics	Benzoate Metabolism	45415	LC/MS Neg	100005391	1294	245.012	187488	86321-32-6			3591402	2291079	281064	1412761	2822810	1209286	807843	2536659	1106939	977947	1256925
171	3-(4-hydroxyphenyl)lactate (HPLA)	Amino Acid	Tyrosine Metabolism	32197	LC/MS Neg	240	1379	181.051	9378	6482-98-0	C03672	HMDB00755	7.96118e+06	14319419	1133591	13112003	9385508	9026151	19580332	17931108	17044512	10489930	16138058
4398	3-(4-hydroxyphenyl)propionate	Xenobiotics	Benzoate Metabolism	39587	LC/MS Neg	100002914	1670	165.056	10394	501-97-3	C01744	HMDB02199	171973	180623	54887	123970	120158	240429	76693	50219	244153		71797
5698	3-acetylphenol sulfate	Xenobiotics	Chemical	48693	LC/MS Neg	100004326	2477	215.002					60772	58863		26575	30829	19290	35679	40326	92576	27411	108103
442	3-amino-2-piperidone	Amino Acid	Urea cycle; Arginine and Proline Metabolism	62853	LC/MS Pos Early	100020361	2065	115.087	5200225	1892-22-4		HMDB00323	283789	375632	46808	367028	236350	279448	376936	254813	410619	135602	260640
4123	3-aminoisobutyrate	Nucleotide	Pyrimidine Metabolism, Thymine containing	1566	LC/MS Pos Early	1114	2190	104.071	64956	10569-72-9;214139-20-5	C05145	HMDB03911	658273	191902					227248	492175	342568		216216
1630	3-carboxy-4-methyl-5-pentyl-2-furanpropionate (3-CMPFP)	Lipid	Fatty Acid, Dicarboxylate	61871	LC/MS Neg	100020004	4000	267.124	194501				58566	69227		80092	54076	58628	64663	65562	63363		53694
4576	3-formylindole	Xenobiotics	Food Component/Plant	62863	LC/MS Neg	100020219	3709	144.046	10256	487-89-8	C08493	HMDB29737	1450498	1287895	227424	853288	788995	680361	1766395	633926	832639	1014144	1414969
363	3-hydroxy-2-ethylpropionate	Amino Acid	Leucine, Isoleucine and Valine Metabolism	32397	LC/MS Neg	100001170	975	117.056	188979	4374-62-3		HMDB00396	109005	233205	75810	136733	226471	246452	419245	181183	282582	218087	549794
3047	3-hydroxy-3-methylglutarate	Lipid	Mevalonate Metabolism	531	LC/MS Polar	112	2850	161.046	1662	503-49-1	C03761	HMDB00355	14499439	26334766	4478689	14237473	16272089	16756711	29149812	30804700	26603776	12994294	26467552
1591	3-hydroxyadipate*	Lipid	Fatty Acid, Dicarboxylate	62069	LC/MS Polar	100004396	3131	161.046	151913			HMDB00345	806966	2403597	320036	1999401	2102685	1687217	2631437	1951774	2697815	1050917	2582447
1848	3-hydroxybutyrate (BHBA)	Lipid	Ketone Bodies	542	LC/MS Polar	254	1480	103.04	441	625-72-9	C01089	HMDB00357	13882229	26116172	35350800	11902954	38484792	30746866	24584656	36332224	19500124	29551792	160613584
1749	3-hydroxybutyroylglycine	Lipid	Fatty Acid Metabolism (Acyl Glycine)	62064	LC/MS Pos Early	100020211	978	162.076						190289	80703	136615		129823	168997	232856	215377	187327	354253
4909	3-hydroxycinnamate sulfate	Xenobiotics	Food Component/Plant	48409	LC/MS Neg	100006094	1338	242.997	6443141	86321-30-4			152562	42068		28006	57712	23769	33929	48524	70444
1888	3-hydroxydecanoate	Lipid	Fatty Acid, Monohydroxy	22053	LC/MS Neg	100000997	4634.7	187.134	26612	5561-87-5		HMDB02203	930835	1061543	398983	737683	795654	1.81394e+06	544024	964830	414889	529084	1333457
1838	3-hydroxydecanoylcarnitine	Lipid	Fatty Acid Metabolism (Acyl Carnitine, Hydroxy)	63358	LC/MS Pos Late	100021141	961	332.243				HMDB61636	328542	426662		209578	232287	660536	201667	190105		119229	620561
1885	3-hydroxyhexanoate	Lipid	Fatty Acid, Monohydroxy	53230	LC/MS Neg	100006367	1725	131.071	151492	10191-24-9			312441	340597	167246	191388	312458	529721	315350	344933	242371	284566	511240
1831	3-hydroxyhexanoylcarnitine (1)	Lipid	Fatty Acid Metabolism (Acyl Carnitine, Hydroxy)	62557	LC/MS Pos Early	100020825	2918	276.181					502368	538346	232509	421077	345411	587702	394142	350802	342858	412186	563594
383	3-hydroxyisobutyrate	Amino Acid	Leucine, Isoleucine and Valine Metabolism	1549	LC/MS Polar	111	1619	103.04	87	2068-83-9	C06001	HMDB00336	4955774	11774082	3077135	6511264	9647570	9300557	10568193	14073399	12998109	8.23462e+06	29398284
1891	3-hydroxylaurate	Lipid	Fatty Acid, Monohydroxy	32457	LC/MS Neg	100001112	5175	215.165	94216	53941-38-1		HMDB00387	1.85547e+06	2214364	554025	1166082	1406564	3.51032e+06	671953	1340861	542699	640202	2600660
1892	3-hydroxymyristate	Lipid	Fatty Acid, Monohydroxy	21158	LC/MS Neg	100000882	5335	243.197	16064	3422-31-9			2763528	3334353	1292475	2283287	2146894	4296252	1.54862e+06	2307796	1405265	1.27378e+06	3027906
1886	3-hydroxyoctanoate	Lipid	Fatty Acid, Monohydroxy	22001	LC/MS Neg	100000773	3446	159.103	26613	88930-08-9		HMDB01954	547956	602209	227313	410890	437634	958447	343517	619799	240010	335815	725854
1896	3-hydroxyoleate*	Lipid	Fatty Acid, Monohydroxy	61843	LC/MS Neg	100019966	5508	297.243					2029568	3378989	968334	4306783	2020494	4698284	1928707	2155989	1590869	1290025	2668166
1840	3-hydroxyoleoylcarnitine	Lipid	Fatty Acid Metabolism (Acyl Carnitine, Hydroxy)	61840	LC/MS Pos Late	100019801	1406	442.353					262806	479510	124863	263338	375565	877979	363734	409330	470041	273875	1478261
1893	3-hydroxypalmitate	Lipid	Fatty Acid, Monohydroxy	27503	LC/MS Neg	100000983	5476	271.228	301590	928-17-6		HMDB10734		4058889	821683	5711540		3654867			1582051		1964120
1839	3-hydroxypalmitoylcarnitine	Lipid	Fatty Acid Metabolism (Acyl Carnitine, Hydroxy)	61839	LC/MS Pos Late	100019800	1380	416.337					263736	330331	117184	218774	266084	596954	251501	193697	282407	182494	636126
5806	3-hydroxypyridine sulfate	Xenobiotics	Chemical	48448	LC/MS Neg	100006098	1595.5	173.987		1955-23-3			508905	1175084	703066	1136594	758400	1477804	695350	514452	2.00723e+06	314821	1015665
1890	3-hydroxysebacate	Lipid	Fatty Acid, Monohydroxy	31943	LC/MS Neg	100001145	1282	217.108	3017884	73141-46-5		HMDB00350	77013	108333	51901	122252	118076	105848	88826	90843	90528	36606	199354
1895	3-hydroxystearate	Lipid	Fatty Acid, Monohydroxy	52938	LC/MS Neg	100008933	5674	299.259	5282907	45261-96-9			1738302	4939161	731323	6206809	1772401	4545362	1931934	1357390	1478580	825528	3354463
4990	3-indoleglyoxylic acid	Xenobiotics	Food Component/Plant	63583	LC/MS Neg	100020372	2140	188.035	73863	1477-49-2			225770	655266	93904	458455	359835	320032	615466	335217	824200	535119	810584
293	3-indoxyl sulfate	Amino Acid	Tryptophan Metabolism	27672	LC/MS Neg	100000467	2222.2	212.002	10258	2642-37-7		HMDB00682	86976736	67905224	15526794	66998396	88814432	95429848	52920440	94899456	60419096	45237744	113313640
4366	3-methoxycatechol sulfate (1)	Xenobiotics	Benzoate Metabolism	48763	LC/MS Neg	100006375	2163	218.997						119262		77134			60065		237317		75381
4367	3-methoxycatechol sulfate (2)	Xenobiotics	Benzoate Metabolism	48752	LC/MS Neg	100006376	2200	218.997					262718	245878		72432	244430	73668	107773	226763	254753		270097
194	3-methoxytyrosine	Amino Acid	Tyrosine Metabolism	12017	LC/MS Pos Early	1342	2555	212.092	1670	300-48-1		HMDB01434	88354	101937	26790	104170	100285	80177	110350	57831	152466		117701
4332	3-methyl catechol sulfate (1)	Xenobiotics	Benzoate Metabolism	46165	LC/MS Neg	100004112	2790	203.002					37779	22331	26406		33145	62470			67929
378	3-methyl-2-oxobutyrate	Amino Acid	Leucine, Isoleucine and Valine Metabolism	44526	LC/MS Polar	100000936	911	115.04	49	3715-29-5	C00141	HMDB00019	2881414	4927153	1147286	4874031	3909689	4354138	7.58239e+06	6408561	4985706	3344865	10988972
354	3-methyl-2-oxovalerate	Amino Acid	Leucine, Isoleucine and Valine Metabolism	15676	LC/MS Neg	100000036	2064.2	129.056	47	1460-34-0;51829-07-3	C00671	HMDB03736	4218278	6442077	969376	6191943	3820348	4336594	9027628	7.08946e+06	7472916	3439364	12967848
325	3-methylcrotonylglycine	Amino Acid	Leucine, Isoleucine and Valine Metabolism	31940	LC/MS Pos Early	100001149	1980	158.081	169485	33008-07-0		HMDB00459		152081		231063	98577	93744	343978	322790	337140	203286	300159
4098	3-methylcytidine	Nucleotide	Pyrimidine Metabolism, Cytidine containing	35132	LC/MS Pos Early	100001466	2176	258.108	159649	21028-20-6			82698	179169		177483	131288	184021	140545	143610	126245	69026	235773
330	3-methylglutaconate	Amino Acid	Leucine, Isoleucine and Valine Metabolism	57747	LC/MS Polar	100002458	2700	99.0452	1551553	5746-90-7		HMDB00522	257323	478529	48118	302348	344901	320872	472295	444922	567089	221358	554491
69	3-methylhistidine	Amino Acid	Histidine Metabolism	15677	LC/MS Neg	100000042	906.3	168.078	64969	368-16-1	C01152	HMDB00479	269326	621733	88711	1135016	952514	411271	611126	505919	784172	107019	1088728
4399	3-phenylpropionate (hydrocinnamate)	Xenobiotics	Benzoate Metabolism	15749	LC/MS Neg	100000010	2860	149.061	107	501-52-0	C05629	HMDB00764	1717381	2617254	167250	607336	962542	682712	514260	509885	825910	262442	708393
1173	3-phosphoglycerate	Carbohydrate	Glycolysis, Gluconeogenesis, and Pyruvate Metabolism	1414	LC/MS Neg	132	583	184.986	724	80731-10-8	C00597	HMDB00807	1.76964e+06	189873	1158432	324941	131609	365533	355469	165417	453096	1240171	372973
4084	3-ureidopropionate	Nucleotide	Pyrimidine Metabolism, Uracil containing	3155	LC/MS Pos Early	1053	875	133.061	111	462-88-4	C02642	HMDB00026	18560696	26914778	9525563	32928600	31749652	24724836	33997728	47542920	106741016	41522192	58584592
511	4-acetamidobutanoate	Amino Acid	Polyamine Metabolism	1558	LC/MS Pos Early	1113	1350	146.081	18189	3025-96-5	C02946	HMDB03681	582075	1120478	185959	711437	695416	916078	1150315	856534	1126059	570979	1208443
4345	4-acetylphenyl sulfate	Xenobiotics	Benzoate Metabolism	44620	LC/MS Neg	100000711	2375	215.002	4684006				200129	212189	41673	71374	152263	143447	105300	166660	325470	82902	274993
4336	4-allylcatechol sulfate	Xenobiotics	Benzoate Metabolism	63597	LC/MS Neg	100020578	3571	229.018					192061	332325		67271	119669	59669	200263	202883	231882	67587	170335
4872	4-allylphenol sulfate	Xenobiotics	Food Component/Plant	37181	LC/MS Neg	100001868	3805	213.023					307780	79526				31532	92631	32067	353034		47166
3089	4-cholesten-3-one	Lipid	Sterol	38125	LC/MS Pos Late	100002227	2520	385.346	91477	601-57-0	C00599	HMDB00921	878131	1677415	218636	1035021	860087	1225743	1463857	830412	1397659	547642	995998
4334	4-ethylcatechol sulfate	Xenobiotics	Benzoate Metabolism	63072	LC/MS Neg	100020536	3379	217.018					133546	131819		41190	78712	66466	171594	30149	410809		111512
4349	4-ethylphenyl sulfate	Xenobiotics	Benzoate Metabolism	36099	LC/MS Neg	100001756	3580	201.023	20822574	123-07-9	C13637	HMDB62551	593773	314421	36733	87319	74216	150034	225906	69160	602951	57959	350306
514	4-guanidinobutanoate	Amino Acid	Guanidino and Acetamido Metabolism	15681	LC/MS Pos Early	100000096	2320	146.092	500	463-003;463-00-3	C01035	HMDB03464	11923444	20968688	2205807	13006827	15003046	14627133	16611621	17401608	11519742	5984235	9170637
1866	4-hydroxybutyrate (GHB)	Lipid	Fatty Acid, Monohydroxy	34585	LC/MS Pos Early	100001507	1148	87.0441	10413	502-85-2	C00989	HMDB00710	1810864	2886485	251528	3.74557e+06	2429689	5053752	2077064	2424205	2.45857e+06	339428	2510914
4958	4-hydroxycinnamate	Xenobiotics	Food Component/Plant	36770	LC/MS Neg	100001675	1457	163.04	637542	501-98-4	C00811	HMDB02035	4206965	318376	1505929	215800	1.27913e+06	9654715	61695	33781	1181287	30572	202525
220	4-hydroxycinnamate sulfate	Amino Acid	Tyrosine Metabolism	48410	LC/MS Neg	100006095	1000	242.997	6070438	376374-66-2			8125131	545108	3458917	249465	1727343	10727126	619626	275867	5529137	106093	586434
4302	4-hydroxyhippurate	Xenobiotics	Benzoate Metabolism	35527	LC/MS Neg	100001423	1475	194.046	151012	2482-25-9		HMDB13678	839915	684203	609863	389138	738711	1933063	694330	771201	1529075	522683	1034497
152	4-hydroxyphenylacetate	Amino Acid	Phenylalanine Metabolism	541	LC/MS Neg	144	1361	151.04	127	156-38-7	C00642	HMDB00020	75668	202243		315229	115070	119023	108992	110244	320496	85470	308788
222	4-hydroxyphenylacetate sulfate	Amino Acid	Tyrosine Metabolism	53027	LC/MS Neg	100006633	867	230.997					1311023	2117644	257208	3.85294e+06	1584056	1225451	1791590	1617071	5753272	1077000	2086024
166	4-hydroxyphenylpyruvate	Amino Acid	Tyrosine Metabolism	1669	LC/MS Neg	1141	1690	179.035	979	156-39-8	C01179	HMDB00707	2382183	7042031	416424	7.71246e+06	4.10492e+06	3972284	11470401	13602178	13750624	6349476	11737554
91	4-imidazoleacetate	Amino Acid	Histidine Metabolism	32349	LC/MS Pos Early	100001207	2055	127.05	96215	645-65-8	C02835	HMDB02024	1384943	2244480	377138	3092295	2460181	1.99514e+06	2107130	2153687	2266983	1357198	2377476
183	4-methoxyphenol sulfate	Amino Acid	Tyrosine Metabolism	48457	LC/MS Neg	100006262	2412	203.002		3233-60-1			273362	261010	25419	30156	191258	46341	188677	293875	179915	116330	242675
307	4-methyl-2-oxopentanoate	Amino Acid	Leucine, Isoleucine and Valine Metabolism	22116	LC/MS Neg	100000551	2170	129.056	70	816-66-0	C00233	HMDB00695	2580263	2791941	496976	3534476	1.75284e+06	1760344	4846955	3434379	4971018	1782960	9205742
4335	4-methylcatechol sulfate	Xenobiotics	Benzoate Metabolism	46146	LC/MS Neg	100004111	2665	203.002					6863241	3553507	438480	262500	492421	200932	7047892	628348	8704635	290329	2672885
1728	4-methylhexanoylglycine	Lipid	Fatty Acid Metabolism (Acyl Glycine)	62736	LC/MS Neg	100020632	3550	186.114					93189	149052		158080	126366	156551	201326	192879	140229	183057	397227
4351	4-vinylphenol sulfate	Xenobiotics	Benzoate Metabolism	36098	LC/MS Neg	100001755	3320	199.007	6426766	2628-17-3	C05627	HMDB62775	820533	1.82119e+06	686444	225595	1001170	7137770	524858	362472	1083702	74305	552809
4121	5,6-dihydrothymine	Nucleotide	Pyrimidine Metabolism, Thymine containing	1418	LC/MS Pos Early	158	1280	129.066	93556	696-04-8	C00906	HMDB00079	148222	249635		257585	194259	155535	181488	249582	1162400	91715	374830
4077	5,6-dihydrouracil	Nucleotide	Pyrimidine Metabolism, Uracil containing	1559	LC/MS Neg	1125	1120	113.036	649	504-07-4	C00429	HMDB00076	128388	128674		145399	144582	121996	120425	158849	230967	78854	193097
4068	5,6-dihydrouridine	Nucleotide	Pyrimidine Metabolism, Uracil containing	61833	LC/MS Neg	100001425	1119	245.078	94312	5627-05-04			3872292	6773506	1.85614e+06	6582595	6528304	7632332	7.35857e+06	5289615	6559959	3056902	7093097
113	5-(galactosylhydroxy)-L-lysine	Amino Acid	Lysine Metabolism	43582	LC/MS Pos Early	100002462	2755	325.161	123986	32448-36-5			445236	399319	70041	413191	442404	489427	449493	488278	440022	209607	495500
129	5-aminovalerate	Amino Acid	Lysine Metabolism	18319	LC/MS Pos Early	100000454	2220	118.086	138	660-88-8	C00431	HMDB03355	4748205	5179227		5261793	5444786	5532878	3572412	3301740	4111668	2455182	929326
1429	5-dodecenoate (12:1n7)	Lipid	Medium Chain Fatty Acid	33968	LC/MS Neg	100001232	5224	197.155	5312378	2430-94-6		HMDB00529	1089469	1834827	794373	1137376	1362442	3451158		1007004		588464	2491514
1795	5-dodecenoylcarnitine (C12:1)	Lipid	Fatty Acid Metabolism (Acyl Carnitine, Monounsaturated)	61769	LC/MS Pos Late	100016069	1135	342.264				HMDB13326	1445022	2386666	587228	1326635	2661632	2986517	1713757	2024527	2099990	1.03289e+06	5574452
1901	5-hydroxyhexanoate	Lipid	Fatty Acid, Monohydroxy	31938	LC/MS Neg	100001148	1267	131.071	170748	44843-89-2		HMDB00525	79130	94191		74931	137111	104240	76527	111173	115037		107760
274	5-hydroxyindoleacetate	Amino Acid	Tryptophan Metabolism	437	LC/MS Neg	71	1510.2	190.051	1826	54-16-0	C05635	HMDB00763	670521	868611	110563	701542	341192	454754	658649	455844	813732	397858	524964
112	5-hydroxylysine	Amino Acid	Lysine Metabolism	15685	LC/MS Pos Early	100000054	2790	163.108	1029	13204-98-3	C16741	HMDB00450	1088326	1171385	185295	911195	915820	1117289	1152325	939031	1276380	571299	1310482
4108	5-methyl-2'-deoxycytidine	Nucleotide	Pyrimidine Metabolism, Cytidine containing	38159	LC/MS Pos Early	100002300	2303	242.113	440055	838-07-3	C03592	HMDB02224	208878	578662		675186	387995	347548	364771	387456	610931	248138	331744
4099	5-methylcytidine	Nucleotide	Pyrimidine Metabolism, Cytidine containing	22119	LC/MS Pos Early	100000763	2227	258.108	92918	2140-61-6		HMDB00982	433904	501211	97953	387756	473702	414454	517276	428470	390373	240459	506609
507	5-methylthioadenosine (MTA)	Amino Acid	Polyamine Metabolism	1419	LC/MS Pos Early	212	2752	298.097	439176	2457-80-9	C00170	HMDB01173	1089443	1737320	308456	1.8687e+06	1819871	2167642	1798421	1.91604e+06	2012255	842832	1959364
402	5-methylthioribose	Amino Acid	Methionine, Cysteine, SAM and Taurine Metabolism	62100	LC/MS Pos Early	100002103	790	181.053	494	23656-67-9		HMDB01087	488755	683318	161712	368597	417298	566885	807262	686477	738030	420180	898346
4070	5-methyluridine (ribothymidine)	Nucleotide	Pyrimidine Metabolism, Uracil containing	35136	LC/MS Neg	100001446	1778.1	257.078	445408	1463-10-1		HMDB00884	44308	86974	24018	50717	54412	65412	99197	59631	85908	28591	77962
530	5-oxoproline	Amino Acid	Glutathione Metabolism	1494	LC/MS Neg	1021	738.5	128.035	7405	98-79-3	C01879	HMDB00267	27262072	25943864	14494980	24819644	33001264	33765728	34623216	19834906	34277628	17790820	22054948
5817	6-hydroxyindole sulfate	Xenobiotics	Chemical	48698	LC/MS Neg	100006260	2498	212.002	122198196				178317	184400	32857	174662	231801	169509	120382	279975	172018	122013	268524
126	6-oxopiperidine-2-carboxylate	Amino Acid	Lysine Metabolism	43231	LC/MS Neg	100004499	965	142.051	3014237	34622-39-4		HMDB61705	200022	362076	59054	334924	210425	196263	197121	244769	623746	118450	326423
3076	7-HOCA	Lipid	Sterol	36776	LC/MS Neg	100001609	5288.1	429.301	3081085	115538-85-7	C17337	HMDB12458	1.64799e+06	2232262	123472	1626914	2129060	1.9419e+06	1063468	1421319	1055622	543585	1251692
3386	7-ketodeoxycholate	Lipid	Secondary Bile Acid Metabolism	31904	LC/MS Neg	100001063	4821	405.265	188292	911-40-0		HMDB00391	140619	122845		839302	405433	589153	40861	73108	213371	28386	201134
4033	7-methylguanine	Nucleotide	Purine Metabolism, Guanine containing	35114	LC/MS Pos Early	100001456	2175	166.072	11361	578-76-7	C02242	HMDB00897	1024447	1.70709e+06	284983	1331607	1309073	1.49189e+06	1873068	1627974	1457819	944989	1771506
1907	8-hydroxyoctanoate	Lipid	Fatty Acid, Monohydroxy	21239	LC/MS Neg	100000956	2300	159.103	69820	764-89-6		HMDB61914	307571	374695	78781	174532	263402	258448	141005	147545	183688	86610	168563
1937	9,10-DiHOME	Lipid	Fatty Acid, Dihydroxy	38399	LC/MS Neg	179	5180	313.238	9966640	263399-34-4	C14828	HMDB04704	736416	991810	210042	1196008	1367859	803873	829145	603368	346124	332148	783539
1758	acetylcarnitine (C2)	Lipid	Fatty Acid Metabolism (Acyl Carnitine, Short Chain)	32198	LC/MS Pos Early	100000802	2282	204.123	1	5080-50-2	C02571	HMDB00201	760214848	796435712	361951456	641937792	984229248	1073908992	757853056	872741952	646755328	467835872	1018765952
1394	acetylphosphate	Energy	Oxidative Phosphorylation	15488	LC/MS Polar	1211	4013.9	138.98	186	94249-01-1	C00227	HMDB01494	1982646	1001321	638205	1185475	1075249	1093755	574441	1.0256e+06	901865	765872	886326
1371	aconitate [cis or trans]	Energy	TCA Cycle	46173	LC/MS Neg	100001359	580	173.009					38181704	48846168	18815168	34329080	34553944	40408368	56781860	53424792	54624296	36365732	52500572
3993	adenosine	Nucleotide	Purine Metabolism, Adenine containing	555	LC/MS Pos Early	798	2169	268.104	60961	58-61-7	C00212	HMDB00050	570390	2180979	478004	1588290	5963889	1363577	1293794	788665	708402	570335	688489
3986	AMP	Nucleotide	Purine Metabolism, Adenine containing	32342	LC/MS Pos Early	209	1013	348.07	6083	149022-20-8	C00020	HMDB00045	48817	139535		118854	148907	129064	71119	35733	42718	37795	90055
1588	adipate	Lipid	Fatty Acid, Dicarboxylate	21134	LC/MS Polar	100000863	3000	145.051	196	124-04-9	C06104	HMDB00448	608921	769814		873810	628240	1018730	941305	857418	1070332	454152	981920
1817	adipoylcarnitine (C6-DC)	Lipid	Fatty Acid Metabolism (Acyl Carnitine, Dicarboxylate)	52988	LC/MS Pos Early	100006614	2570	290.16	71296139			HMDB61677	211746	412036	97224	293048	498900	308190	522863	563036	419049	235157	633936
1500	adrenate (22:4n6)	Lipid	Long Chain Polyunsaturated Fatty Acid (n3 and n6)	32980	LC/MS Neg	100001193	5678	331.264	5497181	2091-25-0	C16527	HMDB02226	11851750	23732136	2099044	20616000	15996347	19931582	20530566	14547084	18091972	5496663	16078595
28	alanine	Amino Acid	Alanine and Aspartate Metabolism	1126	LC/MS Pos Early	811	1700	90.055	5950	56-41-7	C00041	HMDB00161	650849984	853776256	157285984	802468736	576766272	680105344	646647680	509463584	877189632	269753088	432457664
3980	allantoin	Nucleotide	Purine Metabolism, (Hypo)Xanthine/Inosine containing	1107	LC/MS Polar	1002	1672	157.037	204	97-59-6	C02350	HMDB00462	41635764	68061664	12931136	56321936	50292380	52740416	67544232	68363856	81671472	45411292	89614352
311	alpha-hydroxyisocaproate	Amino Acid	Leucine, Isoleucine and Valine Metabolism	22132	LC/MS Neg	100000706	1840	131.071	83697	10303-64-7	C03264	HMDB00746	109623	125268		103672	86655	101747	194429	146428	129882	85067	175347
379	alpha-hydroxyisovalerate	Amino Acid	Leucine, Isoleucine and Valine Metabolism	33937	LC/MS Neg	100001300	1126	117.056	99823	600-37-3		HMDB00407	1.04402e+06	2149108	382850	1404956	1299856	1341207	2.08419e+06	1626318	2231693	852869	2207942
44	alpha-ketoglutaramate*	Amino Acid	Glutamate Metabolism	62101	LC/MS Polar	100002397	1916	144.03	48	18465-19-5			1014121	2435699	116190	1460001	1244937	1475952	2377631	1564925	2496065	1007933	1951690
1375	alpha-ketoglutarate	Energy	TCA Cycle	528	LC/MS Polar	93	2700	145.014	51	305-72-6;328-50-7;22202-68-2	C00026	HMDB00208	127924240	444794560	34564996	190120480	198665136	319303712	607665792	549917632	363379840	258816976	573550528
4197	alpha-tocopherol	Cofactors and Vitamins	Tocopherol Metabolism	1561	LC/MS Pos Late	1105	2522	430.378	14985	59-02-9;10191-41-0	C02477	HMDB01893		85438968		74171112	68771344	83059592	55623432	57855848	57765092		57134960
82	anserine	Amino Acid	Histidine Metabolism	15747	LC/MS Pos Early	100000044	2924	241.13	112072	10030-52-1	C01262	HMDB00194	4803225	4796261	515734	3853203	4525628	4799479	3874683	4.16873e+06	3242266	1163754	2653489
259	anthranilate	Amino Acid	Tryptophan Metabolism	4970	LC/MS Pos Early	1258	2606	138.055	227	118-92-3	C00108	HMDB01123	667849	471439		311991	477002	243788	253425	291939	461283	215777	484053
1213	arabitol/xylitol	Carbohydrate	Pentose Metabolism	48885	LC/MS Polar	100006430	1932.4	151.061					1050548	1327181	223172	1069012	1135531	979709	1402431	1166685	1547159	658813	1069706
1219	arabonate/xylonate	Carbohydrate	Pentose Metabolism	48255	LC/MS Polar	100006115	2700	165.041					11044218	18386892	1791047	16190122	13844484	19907236	12265803	12685652	16932188	6050166	10214095
1442	arachidate (20:0)	Lipid	Long Chain Saturated Fatty Acid	1118	LC/MS Neg	893	6240	311.296	10467	506-30-9	C06425	HMDB02212	12756547	17003456	8391609	29993000	17700934	18798900	13364026	10660996	11790183	10577713	14872398
1498	arachidonate (20:4n6)	Lipid	Long Chain Polyunsaturated Fatty Acid (n3 and n6)	1110	LC/MS Neg	229	5535	303.233	444899	506-32-1	C00219	HMDB01043	235721248	479883840	43373932	517485312	394729728	491895456	391399328	232503440	348631840	78000200	310409120
1807	arachidonoylcarnitine (C20:4)	Lipid	Fatty Acid Metabolism (Acyl Carnitine, Polyunsaturated)	57518	LC/MS Pos Late	100015837	1353	448.342					1494854	2070763	408519	1921758	2072680	3173421	1555872	1592647	1417608	942946	3037420
474	argininate*	Amino Acid	Urea cycle; Arginine and Proline Metabolism	57461	LC/MS Pos Early	100002769	2150	176.103	160437	157-07-3		HMDB03148	357807	777508		420276	477955	672492	868792	809264	608614	347745	518055
436	arginine	Amino Acid	Urea cycle; Arginine and Proline Metabolism	1638	LC/MS Pos Early	231	2825	175.119	232	1119-34-2	C00062	HMDB00517	960439808	956744896	220783152	965312256	739423744	769068096	707146752	542619968	970777408	366702016	660816384
437	argininosuccinate	Amino Acid	Urea cycle; Arginine and Proline Metabolism	15497	LC/MS Pos Early	232	2745	291.13	16950	156637-58-0	C03406	HMDB00052	1549264	1206229	84384	645140	437364	904172	2380974	1055975	1.50505e+06	528820	1065230
4186	ascorbic acid 2-sulfate	Cofactors and Vitamins	Ascorbate and Aldarate Metabolism	63590	LC/MS Polar	100009329	3042	254.982	86484				1274377	2087618	341745	1310204	1436832	1377598	2358619	2.01866e+06	1679915	1243627	2656529
4187	ascorbic acid 3-sulfate*	Cofactors and Vitamins	Ascorbate and Aldarate Metabolism	63687	LC/MS Polar	100020409	2025	254.982	11425365				42999084	85631376	13535521	62336040	90098192	67834000	143636528	108376824	71873888	58283048	90711616
39	asparagine	Amino Acid	Alanine and Aspartate Metabolism	512	LC/MS Pos Early	917	1225	133.061	6267	70-47-3	C00152	HMDB00168	111464328	133827000	37392216	151903760	110039936	120724944	81463480	75094280	152434640	49737036	104549536
35	aspartate	Amino Acid	Alanine and Aspartate Metabolism	443	LC/MS Pos Early	234	1165	134.045	5960	56-84-8	C00049	HMDB00191	46261304	32106052	13006230	49887880	34889108	46985524	19228852	18060328	28428438	15767884	28218768
1602	azelate (C9-DC)	Lipid	Fatty Acid, Dicarboxylate	18362	LC/MS Neg	2029	1276	187.098	2266	123-99-9	C08261	HMDB00784	11901565	18689740	1439127	9051945	16622194	11055877	7.44672e+06	6574305	11740724	1030197	7900127
2970	behenoyl dihydrosphingomyelin (d18:0/22:0)*	Lipid	Dihydrosphingomyelins	57331	LC/MS Pos Late	100009026	3150	789.684				HMDB12091	277909	236075		204281		308352	286568	120662	332353		226505
2976	behenoyl sphingomyelin (d18:1/22:0)*	Lipid	Sphingomyelins	48492	LC/MS Pos Late	100006294	3083	787.669				HMDB12103	24000060	36508312	7194393	41861592	42598252	45615284	39434496	32452064	34448880	15153317	37948020
4308	benzoate	Xenobiotics	Benzoate Metabolism	15778	LC/MS Neg	100000008	1750	121.029	243	65-85-0	C00180	HMDB01870	861892	821753	646096	905105	746723	852623	693998	685642	1.02395e+06	775281	814565
4085	beta-alanine	Nucleotide	Pyrimidine Metabolism, Uracil containing	55	LC/MS Pos Early	244	1905	90.055	239	56-41-7;107-95-9	C00099	HMDB00056	5418883	6.16764e+06	1.90169e+06	6261438	3585778	7505556	4698555	4199280	7.00438e+06	1955064	5170457
327	beta-hydroxyisovalerate	Amino Acid	Leucine, Isoleucine and Valine Metabolism	12129	LC/MS Neg	1442	1027	117.056	69362	625-08-1		HMDB00754	223776	370404	127677	324188	367856	429439	343167	367961	484385	310333	470894
328	beta-hydroxyisovaleroylcarnitine	Amino Acid	Leucine, Isoleucine and Valine Metabolism	35433	LC/MS Pos Early	100001594	2584	262.165		99159-87-2			3.73922e+06	3637632	961018	3208086	4505679	3.8505e+06	3475695	4.06097e+06	3310528	1750265	3.88036e+06
3315	beta-muricholate	Lipid	Primary Bile Acid Metabolism	31885	LC/MS Neg	100001066	4794	407.28	5283853	2393-59-1	C17726	HMDB00415	1762129	1.02878e+06	321965	4804570	2.9302e+06	5458597	790806	667649	1405745	306491	1.71813e+06
6	betaine	Amino Acid	Glycine, Serine and Threonine Metabolism	3141	LC/MS Pos Early	799	1064	118.086	247	107-43-7	C00719	HMDB00043	644311424	742536768	199387744	807021312	781981824	773829760	569781120	654794752	684030656	313573120	500301088
4245	bilirubin (E,E)*	Cofactors and Vitamins	Hemoglobin and Porphyrin Metabolism	32586	LC/MS Neg	100001950	4294	583.256	5315454					115063		112464	134492	141560	52614	106600	114967		43044
4244	bilirubin	Cofactors and Vitamins	Hemoglobin and Porphyrin Metabolism	43807	LC/MS Pos Late	1090	1840	585.271	5280352	635-65-4	C00486	HMDB00054		5.26932e+06		5314201	6519717	6964707	2032335	3124054	1955730		3333591
4247	biliverdin	Cofactors and Vitamins	Hemoglobin and Porphyrin Metabolism	2137	LC/MS Neg	250	4695.6	581.241	5353439	55482-27-4;55482-27-4	C00500	HMDB01008	46397	81686		64225	75962	76497	51591	36838	37459		44792
4226	biopterin	Cofactors and Vitamins	Tetrahydrobiopterin Metabolism	12358	LC/MS Neg	1548	1398	236.079	445040	22150-76-1	C06313	HMDB00468	78320	100701		86628	63375	78540	119355	105969	88712	64698	125989
1616	branched chain 14:0 dicarboxylic acid	Lipid	Fatty Acid, Dicarboxylate	63191	LC/MS Neg	100021374	3849	257.176					89569	69028		27375	42153	27647	43670	46922	81100	24516	57277
5951	branched-chain, straight-chain, or cyclopropyl 10:1 fatty acid (1)*	Partially Characterized Molecules	Partially Characterized Molecules	63615	LC/MS Neg	100021666	4805	169.123					123614	172929	53739	152902	225592	134782	184131	141389	197027	81149	277925
5952	branched-chain, straight-chain, or cyclopropyl 10:1 fatty acid (2)*	Partially Characterized Molecules	Partially Characterized Molecules	63616	LC/MS Neg	100021667	4853	169.123					26620		25803	43271	57664	33089		35525			102558
5954	branched-chain, straight-chain, or cyclopropyl 12:1 fatty acid*	Partially Characterized Molecules	Partially Characterized Molecules	63683	LC/MS Neg	100021709	5261	197.155					3.76686e+06	6198153	2016795	3.93964e+06	8384309	6193587	4879855	4549244	5492181	2170438	8571722
1414	butyrate/isobutyrate (4:0)	Lipid	Short Chain Fatty Acid	40605	LC/MS Neg	1143	1062	87.0452	264	109-92-6	C00246	HMDB00039	265290	1165968	216261	802339	1005306	1037673	488778	594965	634735	365415	1.03619e+06
1691	butyrylcarnitine (C4)	Lipid	Fatty Acid Metabolism (also BCAA Metabolism)	32412	LC/MS Pos Early	100001054	2860	232.154	439829	25576-40-3	C02862	HMDB02013	52978088	143427984	14163834	152196192	114729952	155299200	67306016	56126204	51366252	19565724	72193496
1692	butyrylglycine (C4)	Lipid	Fatty Acid Metabolism (also BCAA Metabolism)	31850	LC/MS Neg	100001151	1470	144.067	88412	20208-73-5		HMDB00808	646642	1488822	177333	1307945	1166525	762563	1037936	1.68791e+06	1096072	1031608	1817949
247	C-glycosyltryptophan	Amino Acid	Tryptophan Metabolism	48782	LC/MS Neg	100006379	1777	365.135	10981970	180509-18-6			101665	93993		94123	103863	118569	84034	106426	98169	50952	130755
4980	caffeic acid sulfate	Xenobiotics	Food Component/Plant	53254	LC/MS Neg	100009337	870	258.992				HMDB41708	4275403	1181265	1993547	2668725	1983183	4672015	2777460	951569	2109464	726979	823572
3093	campesterol	Lipid	Sterol	33997	LC/MS Pos Late	100001269	2873	383.367	173183	474-62-4	C01789	HMDB02869	253652	422500		567063	543834	1010973	956240	557237	457920	129895	737967
1416	caproate (6:0)	Lipid	Medium Chain Fatty Acid	32489	LC/MS Neg	926	2713.7	115.076	8892	142-62-1	C01585	HMDB00535	492078	1464310	518719	1361771	1433631	1462049	1012816	1050226	940677	765933	1683117
1418	caprylate (8:0)	Lipid	Medium Chain Fatty Acid	32492	LC/MS Neg	932	4362	143.108	379	124-07-2	C06423	HMDB00482	1182342	2402639	993361	2.02844e+06	2383877	2436203	1655544	1764842	1532524	969660	2259081
56	carboxyethyl-GABA	Amino Acid	Glutamate Metabolism	40007	LC/MS Pos Early	100003260	2085	176.092	2572	4386-03-02		HMDB02201	497519	422045		352828	403114	435394	439599	418278	367324	264847	320738
1842	carnitine	Lipid	Carnitine Metabolism	15500	LC/MS Pos Early	100000007	1978	162.113	10917	461-05-2	C00318	HMDB00062	408765760	362921888	112438472	416429184	538309120	465449824	439983840	524243008	411398752	274094464	359172736
79	carnosine	Amino Acid	Histidine Metabolism	1768	LC/MS Pos Early	249	2942	227.114	439224	305-84-0	C00386	HMDB00033	7747418	11598369	1288375	7142751	8054578	9470177	9288338	9194184	7044553	3226816	8823266
227	catechol glucuronide	Amino Acid	Tyrosine Metabolism	53243	LC/MS Neg	100009326	1742	285.062	75124209				216504	46884	54647		109944	290809	15181	23015	62543		48487
4328	catechol sulfate	Xenobiotics	Benzoate Metabolism	35320	LC/MS Neg	100001605	1906	188.986	3083879	4918-96-1		HMDB59724	40013200	24522514	10376166	3254776	18855860	32604062	18464772	23913268	32162064	11455673	24339386
2922	ceramide (d16:1/24:1, d18:1/22:1)*	Lipid	Ceramides	57437	LC/MS Pos Late	100015727	3850	620.598					349599	913377	62989	460937	320514	1143063	580220		634079		689318
2923	ceramide (d18:2/24:1, d18:1/24:2)*	Lipid	Ceramides	57443	LC/MS Pos Late	100015744	3858	646.613					3927265	6372282	926453	4026618	2.01558e+06	4911791	7615134	3520774	4770355	1481219	3519581
3308	chenodeoxycholate	Lipid	Primary Bile Acid Metabolism	1563	LC/MS Neg	1123	5264	391.285	10133	474-24-9;474-25-9	C02528	HMDB00518	579758	1303979	204273	1467125	1249770	1814828	1091069	889394	982915	486575	1221363
2095	chiro-inositol	Lipid	Inositol Metabolism	37112	LC/MS Polar	100001859	3191.2	225.062		643-12-9	C19891	HMDB34220	367997	682311		659555	593697	640124	775756	417689	705139	258855	528927
3305	cholate	Lipid	Primary Bile Acid Metabolism	22842	LC/MS Neg	136	5165	407.28	221493	81-25-4	C00695	HMDB00619	1185828	191017	96425	3907245	2.08461e+06	4172761	255546	212763	1123567	178445	973565
3063	cholesterol	Lipid	Sterol	63	LC/MS Pos Late	266	2707	369.352	11025495	57-88-5	C00187	HMDB00067	21416718	37601652	5551749	34331296	27526188	37551280	34038464	20893578	26978324	11685790	27963178
2123	choline	Lipid	Phospholipid Metabolism	15506	LC/MS Pos Early	1256	1961	104.107	305	67-48-1	C00114	HMDB00097	366691328	476949152	130138864	474263488	431605536	461170400	414257088	317878016	396667936	216907744	384532800
2124	phosphocholine	Lipid	Phospholipid Metabolism	34396	LC/MS Pos Early	267	700	184.073	1014	72556-74-2	C00588	HMDB01565	17144876	11626569	5026966	17812770	16876912	15659968	17399346	16018290	13542268	10267147	19484540
4642	cinnamate	Xenobiotics	Food Component/Plant	12115	LC/MS Neg	1259	2878	147.045	444539	140-10-3	C00423	HMDB00930	35503	30384	27001			23908		18410	36529
4643	cinnamoylglycine	Xenobiotics	Food Component/Plant	38637	LC/MS Neg	100002253	3127	204.067	709625	16534-24-0		HMDB11621	1810360	3094902	339425	613402	579333	663949	3.73096e+06	3511713	3530438	1572923	4207684
1421	cis-4-decenoate (10:1n6)*	Lipid	Medium Chain Fatty Acid	62873	LC/MS Neg	100002796	4890	169.123	5312351	505-90-8			160993	383060	87252	301768	501007	513862	95684	209783	64256	69268	444602
1793	cis-4-decenoylcarnitine (C10:1)	Lipid	Fatty Acid Metabolism (Acyl Carnitine, Monounsaturated)	38178	LC/MS Pos Late	100002259	1057	314.233		98930-66-6			673949	885728	181669	462896	1198290	1063488	547816	559709	495355	373549	1104067
75	cis-urocanate	Amino Acid	Histidine Metabolism	40410	LC/MS Neg	100003425	1200	137.036	1549103	7699-35-6		HMDB34174	1181576	702783	852229	1521502	475277	670064	568273	1078882	2798063	859441	1309069
1369	citrate	Energy	TCA Cycle	1564	LC/MS Neg	1124	582	191.02	311	77-92-9	C00158	HMDB00094	378823808	386381440	176838160	285753632	287509920	347621312	440983296	499997984	437825344	377651232	468103744
445	citrulline	Amino Acid	Urea cycle; Arginine and Proline Metabolism	2132	LC/MS Pos Early	391	1520	176.103	9750	372-75-8	C00327	HMDB00904	328770848	475290688	92704144	416120800	307527040	282739616	291832896	267695104	364440288	147617760	369870240
3166	corticosterone	Lipid	Corticosteroids	5983	LC/MS Neg	272	5040	345.207	5753	50-22-6	C02140	HMDB01547	989734	4180893	421179	3928892	4203863	4663502	8558213	7841694	6177296	3403292	8282415
480	creatine	Amino Acid	Creatine Metabolism	27718	LC/MS Pos Early	1221	1947	132.077	586	57-00-1	C00300	HMDB00064	1767973120	1509184000	428883936	1531128704	1498998528	1672291200	1281630848	1309083648	1591454336	725999872	1285589248
482	creatine phosphate	Amino Acid	Creatine Metabolism	33951	LC/MS Polar	100000112	3831	210.029	9548602	922-32-7	C02305	HMDB01511	536344	436624	159669	756076	946750	694431	533009	522929	557569	242513	617078
481	creatinine	Amino Acid	Creatine Metabolism	513	LC/MS Pos Early	275	2055	114.066	588	60-27-5	C00791	HMDB00562	72389256	95106344	22867400	78717224	80841432	86652616	91814584	87046136	93653256	56233608	105216088
408	cystathionine	Amino Acid	Methionine, Cysteine, SAM and Taurine Metabolism	15705	LC/MS Pos Early	310	2270	223.075	439258	535-34-2	C02291	HMDB00099	3280208	6277830		2963772	2784535	4608482	5573528	5566308	4035737		5095947
410	cysteine	Amino Acid	Methionine, Cysteine, SAM and Taurine Metabolism	1868	LC/MS Pos Early	800	1475	122.027	5862	52-90-4;56-89-3	C00097	HMDB00574	1236683	1899020	289157	990561	806188	1027222	1.6963e+06	1154518	2020955	580260	1.16117e+06
416	cysteine s-sulfate	Amino Acid	Methionine, Cysteine, SAM and Taurine Metabolism	22176	LC/MS Pos Early	100000808	565	201.984	115015	1637-71-4	C05824	HMDB00731	327561	246416	136467	384061	385926	398913	1214053	869576	667135	729052	703045
524	cysteine-glutathione disulfide	Amino Acid	Glutathione Metabolism	35159	LC/MS Pos Early	100001437	2465	427.095	4247235	13081-14-6		HMDB00656	1.04201e+06	3.37801e+06	307759	29254612	27299228	27030348	9075257	28380932	8249281	12204865	30729872
528	cysteinylglycine disulfide*	Amino Acid	Glutathione Metabolism	62103	LC/MS Pos Early	100002466	2547	298.053		70555-24-7		HMDB00709		66546		170900	230504	183596	96307	209168	128296	56295	246582
417	cystine	Amino Acid	Methionine, Cysteine, SAM and Taurine Metabolism	56	LC/MS Polar	279	3424	239.017	67678	56-89-3	C00491	HMDB00192	89286	257708		833914	1002259	569947	497025	893265	672379	288576	1.47347e+06
4096	cytidine	Nucleotide	Pyrimidine Metabolism, Cytidine containing	514	LC/MS Pos Early	827	2124	244.093	6175	65-46-3	C00475	HMDB00089	12971399	15674022	6335999	15166152	13397002	22263310	10518998	15060179	14129277	11764982	15363411
4092	CMP	Nucleotide	Pyrimidine Metabolism, Cytidine containing	2372	LC/MS Pos Early	282	835	324.059	6131	63-37-6	C00055	HMDB00095	197332	146274		166666	120200	231355	104415	134671	151455	70249	174226
4097	cytosine	Nucleotide	Pyrimidine Metabolism, Cytidine containing	573	LC/MS Pos Early	881	2060	112.05	597	71-30-7	C00380	HMDB00630	1345647	1432837	518980	756276	885364	856859	2145838	720773	2794049	492788	1127325
4660	daidzein	Xenobiotics	Food Component/Plant	32453	LC/MS Neg	100001219	3566	253.051	5281708	486-66-8	C10208	HMDB03312	113308	349030	26862	222402	221902	79456	124823	46281	326064	38317	52998
4902	daidzein sulfate (2)	Xenobiotics	Food Component/Plant	48728	LC/MS Neg	100006363	3330	333.008					1101407	2570803	79501	1888551	1845432	545440	1183532	347002	3069193	136166	515826
1776	decanoylcarnitine (C10)	Lipid	Fatty Acid Metabolism (Acyl Carnitine, Medium Chain)	33941	LC/MS Pos Late	100001251	1130	316.248	10245190	1492-27-9		HMDB00651	415552	187633	94186	339571	495830	796043		378967			693054
1841	deoxycarnitine	Lipid	Carnitine Metabolism	36747	LC/MS Pos Early	100001662	2052	146.118	134	6249-56-5	C01181	HMDB01161	23522480	27520972	6122852	16713659	25011018	24060270	26887548	25414692	24580268	11164642	19750796
3330	deoxycholate	Lipid	Secondary Bile Acid Metabolism	1114	LC/MS Neg	302	5294	391.285	222528	83-44-3	C04483	HMDB00626	1713533	2702074	711959	3869319	3093954	4402829	1338909	1433525	1400133	699782	1954385
2767	diacylglycerol (16:1/18:2 [2], 16:0/18:3 [1])*	Lipid	Diacylglycerol	54966	LC/MS Pos Late	100010940	2733	608.525					4967240	5239994	1286714	2572216	1129849	3832984	6123770	2218879	5063830	1138044	2.0007e+06
5843	dibutyl sulfosuccinate	Xenobiotics	Chemical	63841	LC/MS Neg	100021538	3557	309.101	423891	5144-51-4			346731	780949	173828	341775	210111	238758	322530	558103	474814	293513	853397
1495	dihomolinoleate (20:2n6)	Lipid	Long Chain Polyunsaturated Fatty Acid (n3 and n6)	17805	LC/MS Neg	1231	5730	307.264	6439848	2091-39-6	C16525	HMDB05060	27002312	48695744	5454863	34281240	25167366	38630240	33416830	18360600	32277250	8624201	22557708
1497	dihomolinolenate (20:3n3 or 3n6)	Lipid	Long Chain Polyunsaturated Fatty Acid (n3 and n6)	35718	LC/MS Neg	100001739	5596	305.249	5280581	17046-59-2	C03242	HMDB02925	40345304	77893632	9522140	64845012	42731804	60786688	51517928	27376956	56233628	12453094	35472296
1808	dihomo-linolenoylcarnitine (C20:3n3 or 6)*	Lipid	Fatty Acid Metabolism (Acyl Carnitine, Polyunsaturated)	57521	LC/MS Pos Late	100015840	1392	450.358					220837	275394		214539	290775	339492	196378	196878	197658	157233	357791
1806	dihomo-linoleoylcarnitine (C20:2)*	Lipid	Fatty Acid Metabolism (Acyl Carnitine, Polyunsaturated)	57520	LC/MS Pos Late	100015839	1436	452.373					170479	260923		238538	313890	352657	180737	145935	219789	120447	216799
4624	dihydrocaffeate sulfate (2)	Xenobiotics	Food Component/Plant	62524	LC/MS Neg	100020822	930	261.007					433630	485075	43217	193681	85210		262882	229864	442734	105108	200658
4669	dihydroferulic acid sulfate	Xenobiotics	Food Component/Plant	62857	LC/MS Neg	100020272	1310	275.023	187489			HMDB41724	330442	368236	24305	156842	245615	175982	363014	258433	347790	205842	197841
4052	dihydroorotate	Nucleotide	Pyrimidine Metabolism, Orotate containing	601	LC/MS Polar	923	1910	157.025	648	155-54-4	C00337	HMDB03349	141278	474448		593220	517150	413950	408904	342865	239132	52931	273784
5743	dimethyl sulfone	Xenobiotics	Chemical	43424	LC/MS Pos Early	100004284	832	95.0161	6213	67-71-0	C11142	HMDB04983	281940	679949		593858	670902	439229	752375	365904	360745	104587	330860
451	dimethylarginine (ADMA + SDMA)	Amino Acid	Urea cycle; Arginine and Proline Metabolism	36808	LC/MS Pos Early	100001810	2850	203.15	123831	102783-24-4	C03626	HMDB01539	31853982	41518664	5816428	32935364	25408800	28834684	30230890	23497448	44392772	11348429	33056416
5	dimethylglycine	Amino Acid	Glycine, Serine and Threonine Metabolism	5086	LC/MS Pos Early	806	1104	104.071	673	1118-68-9	C01026	HMDB00092	25955724	44492744	10313932	38670888	36750840	40131504	45382792	44847600	40912744	29127258	44317980
1502	docosadienoate (22:2n6)	Lipid	Long Chain Polyunsaturated Fatty Acid (n3 and n6)	32415	LC/MS Neg	100001182	6034	335.296	5282807	7370-49-2	C16533	HMDB61714	848409	1335794	174731	1076356	779210	1249631	951833	642407	796710	313063	868390
1627	docosadioate (C22-DC)	Lipid	Fatty Acid, Dicarboxylate	39837	LC/MS Neg	100002952	5291.8	369.301	244872	505-56-6	C19625		169608	269885	95068	419754	407439	336690	215385	199322	249273	155997	210729
1488	docosahexaenoate (DHA; 22:6n3)	Lipid	Long Chain Polyunsaturated Fatty Acid (n3 and n6)	44675	LC/MS Neg	100000665	5525	327.233	445580	6217-54-5	C06429	HMDB02183	116382648	211623440	16900384	234424368	149236272	218727808	155095168	75311688	132764368	27742870	109480416
1487	docosapentaenoate (DPA; 22:5n3)	Lipid	Long Chain Polyunsaturated Fatty Acid (n3 and n6)	32504	LC/MS Neg	100001181	5571	329.249	6441454	2234-74-4	C16513	HMDB06528	10854574	18448956	1834570	17430500	11213207	16457815	15055170	7267958	13707415	2845350	8728638
1501	docosapentaenoate (n6 DPA; 22:5n6)	Lipid	Long Chain Polyunsaturated Fatty Acid (n3 and n6)	37478	LC/MS Neg	100001580	5624.5	329.249	6441454	25182-74-5	C16513	HMDB01976	9694293	14094982	1018740	14677850	10400465	14130671	12329423	9286878	10498857	2551147	8564118
1489	docosatrienoate (22:3n3)	Lipid	Long Chain Polyunsaturated Fatty Acid (n3 and n6)	32417	LC/MS Neg	100001195	5823	333.28	5312556	59708-86-0	C16534	HMDB02823	645259	1102518		731440	522273	977017	960536	516201	802367	133214	547541
1499	docosatrienoate (22:3n6)*	Lipid	Long Chain Polyunsaturated Fatty Acid (n3 and n6)	57467	LC/MS Neg	100015762	5850	333.28					636619	1473341		946517	380433	1386647	1260784	867774	966719	236023	553286
1612	dodecadienoate (12:2)*	Lipid	Fatty Acid, Dicarboxylate	62276	LC/MS Neg	100020478	5146	195.139					706782	994120	167444	496753	992758	1016821	304136	325492	178294	231183	991082
1611	dodecenedioate (C12:1-DC)*	Lipid	Fatty Acid, Dicarboxylate	61864	LC/MS Neg	100019972	2700	227.129					95023	135402		158759	132961	122927	93327	48651	208666	27108	145140
214	dopamine 3-O-sulfate	Amino Acid	Tyrosine Metabolism	48407	LC/MS Neg	100006361	1556.2	232.029	122136		C13690	HMDB06275	83452	119341		107298	81500	65961	104216	92825	116258	69472	133425
1485	eicosapentaenoate (EPA; 20:5n3)	Lipid	Long Chain Polyunsaturated Fatty Acid (n3 and n6)	18467	LC/MS Neg	2050	5450	301.217	446284	10-2005-9;10417-94-4	C06428	HMDB01999	12593442	23978792	3566340	21111826	12527286	15010874	15580727	7751745	14281440	3276952	8874104
1468	eicosenoate (20:1n9 or 1n11)	Lipid	Long Chain Monounsaturated Fatty Acid	33587	LC/MS Neg	100001335	5950	309.28	5282768		C16526	HMDB02231	43890900	86546864	15542701	133288920	63205108	83585200	54825896	42268128	53692472	22222884	60491232
1800	eicosenoylcarnitine (C20:1)*	Lipid	Fatty Acid Metabolism (Acyl Carnitine, Monounsaturated)	57519	LC/MS Pos Late	100015838	1484	454.389					203153	328489		391272	530884	470574	245659	258827	309847	234381	469626
4677	enterolactone sulfate	Xenobiotics	Food Component/Plant	64041	LC/MS Neg	100020407	3746	377.07					900022	2061585	300983	687939	610327	528945	1135782	594754	1321245	129846	686114
4680	equol glucuronide	Xenobiotics	Food Component/Plant	41948	LC/MS Neg	100003895	3215	417.119					12937	162041		48245	73579	30431	60552	24436	48556		87567
4681	equol sulfate	Xenobiotics	Food Component/Plant	40478	LC/MS Neg	100003429	3630	321.044					2700683	8566028	771227	2911835	5398622	2926115	7682801	4275135	4230597	1537990	8237262
4682	ergothioneine	Xenobiotics	Food Component/Plant	37459	LC/MS Pos Early	100002154	850	230.096	3032311	58511-63-0	C05570	HMDB03045	580241	1981564	165824	2846561	2551929	3235969	2584639	2575548	1799265	506634	2162262
1472	erucate (22:1n9)	Lipid	Long Chain Monounsaturated Fatty Acid	1552	LC/MS Neg	1087	6355.6	337.311	5281116	112-86-7	C08316	HMDB02068	2413912	4422719	1090066	12951089	4630921	5605329	3052313	2387188	2758798	1.54947e+06	3974264
4684	erythritol	Xenobiotics	Food Component/Plant	20699	LC/MS Polar	100000846	1491	167.056	222285	149-32-6	C00503	HMDB02994	141353	177672		169562	139043	331108	322694	274951	207902	217999	327491
1361	erythronate*	Carbohydrate	Aminosugar Metabolism	42420	LC/MS Polar	100001320	2186	135.03	2781043	88759-55-1		HMDB00613	27242034	51485700	7.60214e+06	40441180	37750332	51638368	56556716	50319180	52089892	25803960	62297132
4873	ethyl alpha-glucopyranoside	Xenobiotics	Food Component/Plant	63152	LC/MS Pos Early	100015965	1248	226.129	428040	34625-23-5			110014	54100	173537	53072			126311		96944		138330
5000	ethyl beta-glucopyranoside	Xenobiotics	Food Component/Plant	64131	LC/MS Neg	100020377	1519	207.087	121667				326878	334754	52930	270769	250727	217831	188505	237053	302457	70137	217384
365	ethylmalonate	Amino Acid	Leucine, Isoleucine and Valine Metabolism	15765	LC/MS Polar	2054	2785	131.035	11756	601-75-2		HMDB00622	7.29283e+06	11959900	3278329	5655587	9482843	9724682	9971009	10057380	11196155	5357180	12030042
4689	ferulate	Xenobiotics	Food Component/Plant	35630	LC/MS Neg	100001542	1755	193.051	445858	537-98-4	C01494	HMDB00954	107284	160551	46997	186424	146294	286332	39947	22099	123217		56317
4690	ferulic acid 4-sulfate	Xenobiotics	Food Component/Plant	47114	LC/MS Neg	100005389	1200	273.007	6305574	86321-29-1		HMDB29200	3717315	4468579	1145238	3289027	4418679	8914304	4084702	1502956	4746042	788567	2.01989e+06
4171	FAD	Cofactors and Vitamins	Riboflavin Metabolism	2134	LC/MS Neg	327	2425	784.15	643975	146-14-5;84366-81-4	C00016	HMDB01248	29222	43017		41359	42215	54383	39880	41204	42296	21869	45921
77	formiminoglutamate	Amino Acid	Histidine Metabolism	43493	LC/MS Pos Early	100002500	1880	175.071	439233	816-90-0	C00439	HMDB00854	1045474	2170566	69540	1138535	1190329	1288567	1.8e+06	1.92071e+06	2017601	990737	1939088
1279	fructose	Carbohydrate	Fructose, Mannose and Galactose Metabolism	577	LC/MS Polar	878	2065	179.056	5984	57-48-7	C00095	HMDB00660	4792516	10668777	1.00523e+06	8463315	7755316	8807482	13100930	5604915	9190781	2750355	6711515
114	fructosyllysine	Amino Acid	Lysine Metabolism	46227	LC/MS Pos Early	100005373	2784	309.166	123708	21291-40-7			17190614	40433608	9717354	62301896	66342816	64428912	86433816	53639672	61941720	10624488	29146132
1379	fumarate	Energy	TCA Cycle	1643	LC/MS Polar	330	3084	115.004	444972	100-17-8	C00122	HMDB00134	12251449	17301518	2.08227e+06	9261046	8027916	12839069	33330586	25689898	17193900	11610112	24624472
1305	galactonate	Carbohydrate	Fructose, Mannose and Galactose Metabolism	27719	LC/MS Polar	100001026	3085	195.051	128869	299-28-5	C00880	HMDB00565	633758	2937644		526107	1082919	994825	2969826	1056252	1620233	579394	357734
600	gamma-glutamyl-2-aminobutyrate	Peptide	Gamma-glutamyl Amino Acid	37092	LC/MS Pos Early	100001502	2380	233.113		16869-42-4			125855	209261		73877	115707	99730	153822		205554	37347	167636
590	gamma-glutamyl-alpha-lysine	Peptide	Gamma-glutamyl Amino Acid	55015	LC/MS Pos Early	100010901	2784	276.155	65254				3022806	3700687	405861	2460684	2394724	2337588	2295205	1700727	3033333	956928	2520238
591	gamma-glutamyl-epsilon-lysine	Peptide	Gamma-glutamyl Amino Acid	33934	LC/MS Pos Early	100001262	2725	276.155	7015685	17105-15-6		HMDB03869	1514576	1.98901e+06	313367	634178	1249400	1800717	2089661	2860272	1160952	297186	1.75884e+06
582	gamma-glutamylalanine	Peptide	Gamma-glutamyl Amino Acid	37063	LC/MS Polar	100001843	3420	217.083	440103	5875-41-2		HMDB29142	398945	725641	44800	484613	408009	434212	768567	559257	634402	262150	413456
599	gamma-glutamylcitrulline*	Peptide	Gamma-glutamyl Amino Acid	62104	LC/MS Pos Early	100020241	1644	305.146					1479521	4456523		2997734	3075341	2557661	4.02129e+06	4309894	2205689	1513163	3924391
584	gamma-glutamylglutamate	Peptide	Gamma-glutamyl Amino Acid	36738	LC/MS Pos Early	331	1775	277.103	92865	1116-22-9	C05282	HMDB11737	676560	782503		426763	477430	682913	758912	858444	306347	428751	988305
585	gamma-glutamylglutamine	Peptide	Gamma-glutamyl Amino Acid	2730	LC/MS Pos Early	1140	1430	276.119	150914	10148-81-9	C05283	HMDB11738	12897798	26483346	3893831	19057554	19426970	23149504	21865112	22566704	20324056	11606610	24911334
586	gamma-glutamylglycine	Peptide	Gamma-glutamyl Amino Acid	33949	LC/MS Pos Early	100001294	1535	205.082	165527	1948-29-4		HMDB11667	10471060	17022620	1739097	10591049	9850289	12088024	13374330	12516007	12303557	5436781	13788221
587	gamma-glutamylhistidine	Peptide	Gamma-glutamyl Amino Acid	18245	LC/MS Pos Early	1235	2740	285.119	7017195	37460-15-4			805493	1217569	143679	962229	839944	1059367	1023376	853809	1.02586e+06	441983	1049468
588	gamma-glutamylisoleucine*	Peptide	Gamma-glutamyl Amino Acid	34456	LC/MS Pos Early	100001485	2940	261.144	14253342			HMDB11170	1102778	1674251	217586	1140608	920099	1213666	1419689	1290781	1806131	682601	1841609
589	gamma-glutamylleucine	Peptide	Gamma-glutamyl Amino Acid	18369	LC/MS Pos Early	1268	2991	261.144	151023	2566-39-4		HMDB11171	2366074	4012916	441657	2914619	1959372	2748151	3509147	3073024	4415731	1708014	4860826
592	gamma-glutamylmethionine	Peptide	Gamma-glutamyl Amino Acid	44872	LC/MS Pos Early	100001313	2640	279.101	7009567	17663-87-5		HMDB29155	796292	4305415	213337	2898374	2667465	2321123	3405892	3650811	3255277	998477	3204925
593	gamma-glutamylphenylalanine	Peptide	Gamma-glutamyl Amino Acid	33422	LC/MS Pos Early	100000491	2992	295.129	111299	7432-24-8		HMDB00594	1114490	1.64389e+06	169833	1160002	980540	1303646	1.4888e+06	1.4424e+06	1623093	623467	1.80835e+06
594	gamma-glutamylthreonine	Peptide	Gamma-glutamyl Amino Acid	33364	LC/MS Pos Early	100001314	1750	249.108	76078708	5652-48-2		HMDB29159	8322488	11751089	1822741	7063374	8.25287e+06	7451893	10272778	7221630	8762039	4352722	6768961
595	gamma-glutamyltryptophan	Peptide	Gamma-glutamyl Amino Acid	33947	LC/MS Pos Early	100001295	2975	334.14	3989307	66471-20-3		HMDB29160	698662	946742	117823	533513	629545	624382	961193	1003842	931246	556040	1512603
596	gamma-glutamyltyrosine	Peptide	Gamma-glutamyl Amino Acid	2734	LC/MS Pos Early	1102	2518	311.124	94340	7432-23-7		HMDB11741	1105842	1936545		1269889	911102	1379537	1527515	1269774	2076867	880309	2948237
597	gamma-glutamylvaline	Peptide	Gamma-glutamyl Amino Acid	43829	LC/MS Pos Early	100001126	2700	247.129	7015683	2746-34-1		HMDB11172	2233953	3938559	463147	2707719	2325190	3199889	3730159	3433252	3849425	1753303	4554773
4219	gamma-tocopherol/beta-tocopherol	Cofactors and Vitamins	Tocopherol Metabolism	52473	LC/MS Pos Late	100008998	2384	416.364						395848		148402	126795	167902	412631	127702		60158
4663	genistein sulfate*	Xenobiotics	Food Component/Plant	62061	LC/MS Neg	100020207	3616	349.002					490225	1621386	224848	1303849	1272284	643171	916703	246127	2.07837e+06	134026	435090
209	gentisate	Amino Acid	Tyrosine Metabolism	18280	LC/MS Neg	100000447	1459.8	153.019	3469	490-79-9	C00628	HMDB00152	371443	256831	106568	112776	97320	345247	266882	115564	648165	54624	78425
4595	gluconate	Xenobiotics	Food Component/Plant	587	LC/MS Polar	338	2922	195.051	10690	527-07-1	C00257	HMDB00625	1807025	3263271	261095	2223485	1529461	2260865	4090205	2175101	2628811	723026	1872375
[truncated: 382 more rows]

## Sheet: Mouse muscle
												CLIENT IDENTIFIER	15. muscle ctrl	16. muscle ctrl	17. muscle ctrl	18. muscle ctrl	19. muscle ctrl	20 muscle ctrl	21. muscle run	22. muscle run	23. muscle run	24. muscle run	25. muscle run	26. muscle run
[truncated: 594 more rows]

[truncated: 2 more sheets: Mouse lymph nodes, Mouse spleen]
