# Supplementary material for: Cytotoxic T-cells mediate exercise-induced reductions in tumor growth
Source: eLife. 2020 Oct 23;9:e59996. doi: 10.7554/eLife.59996 (PMC7584454; doi:10.7554/eLife.59996)
Supplement: Figure 4—source data 1. [file elife-59996-fig4-data1.xlsx]

## Sheet: Isotope Ratio
compound Name	PG1	PG2	PG3	PG4	PG5	PG6	PG7	PG8	PG9	PG10	PG11	PG12	PG13	PG14	PG15	PG16								10ul Metabolite Mix	10ul Metabolite Mix	Hexane	Hexane	Hexane	Hexane	Hexane	Hexane	Hexane	Hexane	Hexane	Hexane	Hexane	Hexane	Hexane	Hexane	Hexane	Hexane
	PG1.CDF	PG2.CDF	PG3.CDF	PG4.CDF	PG5.CDF	PG6.CDF	PG7.CDF	PG8.CDF	PG9.CDF	PG10.CDF	PG11.CDF	PG12.CDF	PG13.CDF	PG14.CDF	PG15.CDF	PG16.CDF								10ul Metabolite Mix_1.CDF	10ul Metabolite Mix_2.CDF	Hexane_1.CDF	Hexane_10.CDF	Hexane_11.CDF	Hexane_12.CDF	Hexane_13.CDF	Hexane_14.CDF	Hexane_15.CDF	Hexane_16.CDF	Hexane_2.CDF	Hexane_3.CDF	Hexane_4.CDF	Hexane_5.CDF	Hexane_6.CDF	Hexane_7.CDF	Hexane_8.CDF	Hexane_9.CDF
Pyruvate	0.501347	0.44973	0.477472	0.513219	0.4531	0.785702	0.504349	0.610662	0.482992	0.442105	0.49579	0.596369	0.516257	0.450967	0.441676	0.472865								0.964737	0.964722	0	6.5817e-19	0	0	0.237552	6.14262e-19	0	0	0	0	0.241787	0.0338914	0.0230865	0.0155067	0	8.15896e-20
Pyruvate	0.0660322	0.0690821	0.0711527	0.0781118	0.0950968	0.0452664	0.0744463	0.066069	0.0634972	0.0665956	0.0535179	0.0478114	0.0528291	0.054541	0.0533438	0.0557453								0.0208221	0.0208315	0	0.0434597	0.0776828	0	0.222728	0.02498	0	0	0	0	0.195916	0.171955	0.130054	0.199183	0.036045	0.0661448
Pyruvate	0.311589	0.351521	0.316942	0.278302	0.30273	0.11425	0.283854	0.215346	0.316026	0.345352	0.330464	0.255061	0.317333	0.363887	0.381566	0.351133								0.0114447	0.0121275	0.0254133	0.0456226	0.120877	0.0271707	0.113325	0.0315844	0	0.0125403	0	0	0.119761	0.135381	0.0301097	0.163682	0.0558903	0.0525329
Pyruvate	0.121031	0.129667	0.134433	0.130368	0.149073	0.0547813	0.137351	0.107923	0.137485	0.145948	0.120228	0.100759	0.113581	0.130605	0.123415	0.120258								0.00299627	0.00231873	0.974587	0.910918	0.80144	0.972829	0.426395	0.943436	1	0.98746	1	1	0.442536	0.658772	0.81675	0.621629	0.908065	0.881322
Lactate	0.981329	0.980717	0.982171	0.980668	0.976809	0.982981	0.981702	0.983215	0.969834	0.965668	0.973142	0.971435	0.974085	0.973237	0.972364	0.975981								0.926131	0.909683	0.345553	0.571524	0.511472	0.525576	0.585497	0.510058	0.520779	0.565068	0.467189	0.351314	0.571341	0.500389	0.487647	0.544581	0.547795	0.590059
Lactate	0.00494465	0.0047634	0.00411569	0.00557219	0.00893241	0.00388224	0.0048152	0.00452872	0.00509433	0.00596919	0.00359442	0.00451205	0.00419769	0.00429937	0.0039182	0.00369146								0.0531295	0.0650848	0.0643167	0.138622	0.171925	0.161395	0.116365	0.14201	0.0655585	0.0616995	0.0326043	0.105077	0.122909	0.152454	0.157017	0.130623	0.155661	0.131079
Lactate	0.0137265	0.0145197	0.0137134	0.0137598	0.0142585	0.0131371	0.0134829	0.0122563	0.0250716	0.0283628	0.0232633	0.0240526	0.0217173	0.0224634	0.0237183	0.0203275								0.0207398	0.0252324	0.59013	0.289854	0.316603	0.313029	0.298138	0.347932	0.413663	0.373232	0.500207	0.543609	0.30575	0.347157	0.355336	0.324797	0.296543	0.278862
Alanine	0.982079	0.98157	0.980293	0.980484	0.97863	0.978658	0.980348	0.979612	0.979551	0.979717	0.979609	0.980739	0.980476	0.980386	0.979709	0.979821								0.970677	0.970822	0	0	0	0	0	0	0	0	0	0	0	0	0	0	0	0
Alanine	0.00991798	0.0103154	0.0115452	0.0115415	0.0129521	0.0131987	0.0119461	0.0123376	0.0121897	0.0120481	0.0120088	0.0111791	0.0113951	0.0116063	0.0117132	0.0119282								0.0213471	0.0214	0	0	0	0	0	0	0	0	0	0	0	0	0	0	0	0
Alanine	0.00800278	0.00811502	0.00816132	0.00797434	0.00841793	0.00814349	0.0077063	0.00805054	0.00825952	0.00823527	0.00838181	0.00808236	0.00812891	0.00800738	0.00857811	0.00825126								0.00797634	0.00777786	0	0	0	0	0	0	0	0	0	0	0	0	0	0	0	0
Oxalate	0.0731353	0.0716444	0.0287606	0.0180052	0.0341085	0.0174541	0.0320107	0.0460349	0.0202673	0.0285432	0.0209218	3.33067e-16	3.33067e-16	0.0265981	3.33067e-16	0.0327328								0.25251	0.146214	0	0	0	0	0	0	0	0	0	0	0	0	0	0	0	0
Oxalate	0.926865	0.928356	0.971239	0.981995	0.965891	0.982546	0.967989	0.953965	0.979733	0.971457	0.979078	1	1	0.973402	1	0.967267								0.74749	0.853786	0	0	0	0	0	0	0	0	0	0	0	0	0	0	0	0
Valine	0.80121	0.833955	0.798843	0.808604	0.813392	0.74891	0.761496	0.753353	0.790237	0.792606	0.820521	0.867173	0.820891	0.770831	0.766807	0.813108								0.619213	0.570452	0	0	0	0	0	0	0	0	0	0	0	0	0	0	0	0
Valine	0.00310114	0.00177445	0.00303694	0.00314427	0.00303309	0.00400991	0.00554669	0.00327051	0.00170972	0.000941081	0.00217111	0.000839417	0.00136318	0.00372285	0.00271801	0.000992744								0.151816	0.178484	0	0	0	0	0	0	0	0	0	0	0	0	0	0	0	0
Valine	0.00283466	0.00343447	0.0036942	0.00400441	0.00430279	0.00425026	0.00391818	0.00359887	0.00404747	0.00348826	0.00285716	0.0025657	0.00392689	0.00432865	0.00282871	0.00399406								0.0353969	0.0400528	0	0	0	0	0	0	0	0	0	0	0	0	0	0	0	0
Valine	0.170595	0.145132	0.171492	0.169179	0.169274	0.207304	0.193378	0.204613	0.184269	0.189716	0.156142	0.119869	0.154332	0.191999	0.197257	0.163046								0.183428	0.199947	0	0	0	0	0	0	0	0	0	0	0	0	0	0	0	0
Valine	0.0222593	0.0157043	0.0229344	0.0150691	0.00999768	0.0355255	0.0356617	0.0351645	0.0197361	0.0132485	0.0183092	0.00955306	0.0194864	0.0291183	0.0303887	0.0188584								0.0101462	0.0110644	0	0	0	0	0	0	0	0	0	0	0	0	0	0	0	0
Valine 218	0.957085	0.960337	0.954478	0.956649	0.960662	0.946783	0.953797	0.949449	0.954783	0.96248	0.958034	0.964124	0.958405	0.9481	0.94995	0.962498								0.946269	0.933386	0	0	0	0	0	0	0	0	0	0	0	0	0	0	0	0
Valine 218	0.0429147	0.0396632	0.041548	0.0433515	0.039338	0.0501856	0.0404095	0.0450712	0.0452166	0.0375196	0.0388516	0.0358763	0.0415949	0.0461021	0.0449913	0.0375016								0.0524645	0.0635995	0	0	0	0	0	0	0	0	0	0	0	0	0	0	0	0
Valine 218	0	0	0.00397413	0	0	0.00303147	0.00579375	0.0054796	0	0	0.00311431	0	0	0.00579772	0.00505917	0								0.00126654	0.00301491	0	0	0	0	0	0	0	0	0	0	0	0	0	0	0	0
Urea	0.709727	0.716969	0.721145	0.718765	0.681178	0.727732	0.716097	0.726103	0.728929	0.719162	0.742755	0.741038	0.706271	0.707999	0.729558	0.723388								1	0.98569	0	0	0	0	0	0	0	0	0	0	0	0	0	0	0	0
Urea	0.290273	0.283031	0.278855	0.281235	0.318822	0.272268	0.283903	0.273897	0.271071	0.280838	0.257245	0.258962	0.293729	0.292001	0.270442	0.276612								2.22045e-16	0.0143102	0	0	0	0	0	0	0	0	0	0	0	0	0	0	0	0
Leucine	0.907236	0.94062	0.910588	0.909586	0.914226	0.864075	0.845256	0.85908	0.879788	0.876768	0.931408	0.975507	0.930882	0.86511	0.849072	0.900034								0.706414	0.666479	0	0	0	0	0	0	0	0	0	0	0	0	0	0	0	0
Leucine	0.009444	0.00651966	0.00924781	0.00689157	0.0128531	0.0171212	0.0193437	0.0197758	0.0121386	0.0142404	0.00889256	0.00347136	0.00966831	0.0170545	0.0193801	0.0148602								0.243278	0.277099	0	0	0	0	0	0	0	0	0	0	0	0	0	0	0	0
Leucine	0.0279846	0.0189687	0.027006	0.0257101	0.0202817	0.0273688	0.0432991	0.0281623	0.034567	0.0256283	0.0194117	0.0060784	0.0152456	0.0300983	0.0334832	0.0228497								0.045749	0.0517344	0	0	0	0	0	0	0	0	0	0	0	0	0	0	0	0
Leucine	0.00977539	0.00628986	0.0100103	0.0114692	0.00952807	0.0184239	0.017671	0.0184009	0.0146471	0.0161392	0.00930597	0.00331198	0.00884705	0.0172418	0.0208626	0.0130954								0	0	0	0	0	0	0	0	0	0	0	0	0	0	0	0	0	0
Leucine	0.00596062	0.00412405	0.00668427	0.00671486	0.00644593	0.0112655	0.0104643	0.0126424	0.00761189	0.00706986	0.00420993	0.00172282	0.00615036	0.00906799	0.00987031	0.00660815								0	0	0	0	0	0	0	0	0	0	0	0	0	0	0	0	0	0
Leucine	0.0395997	0.0234779	0.0364633	0.0396277	0.0366654	0.0617453	0.0639654	0.0619385	0.0512473	0.0601538	0.0267714	0.00990856	0.0292064	0.0614276	0.0673317	0.0425523								0.00455862	0.00468734	0	0	0	0	0	0	0	0	0	0	0	0	0	0	0	0
Leucine 218	0.229155	0.266704	0.228989	0.248761	0.344525	0.202227	0.202532	0.219622	0.16602	0.155241	0.227919	0.452501	0.209712	0.143042	0.151673	0.170463								0.960965	0.94517	0	0	0	0	0	0	0	0	0	0	0	0	0	0	0	0
Leucine 218	0.736745	0.706471	0.740823	0.716446	0.619822	0.759347	0.750739	0.742459	0.791127	0.808532	0.741434	0.529269	0.760502	0.817876	0.809692	0.795885								0.0356505	0.0484167	0	0	0	0	0	0	0	0	0	0	0	0	0	0	0	0
Leucine 218	0.0341	0.0268255	0.0301886	0.0347933	0.0356532	0.0384268	0.0467298	0.0379194	0.0428532	0.0362267	0.0306474	0.0182303	0.0297856	0.0390824	0.0386351	0.0336522								0.00338475	0.00641335	0	0	0	0	0	0	0	0	0	0	0	0	0	0	0	0
Glycerol
Glycerol
Glycerol
Isoleucine	0.292684	0.293852	0.276738	0.289479	0.312637	0.285423	0.295993	0.283394	0.283542	0.285179	0.293565	0.301949	0.297043	0.289992	0.287176	0.288829								0.747105	0.702772	0	0	0	0	0	0	0	0	0	0	0	0	0	0	0	0
Isoleucine	0.163962	0.156969	0.153973	0.143512	0.142099	0.151566	0.162747	0.168519	0.16397	0.159569	0.168922	0.15521	0.16077	0.154021	0.163066	0.15978								0.199727	0.240062	0	0	0	0	0	0	0	0	0	0	0	0	0	0	0	0
Isoleucine	0.138002	0.133982	0.14979	0.140081	0.132902	0.158631	0.135378	0.136011	0.132865	0.129501	0.121169	0.155942	0.125305	0.120458	0.125257	0.12156								0.0427071	0.0493823	0	0	0	0	0	0	0	0	0	0	0	0	0	0	0	0
Isoleucine	0.099067	0.105208	0.0998463	0.103917	0.0921686	0.0917581	0.100126	0.107299	0.107805	0.103431	0.122897	0.108342	0.120983	0.104751	0.102563	0.12076								8.5236e-21	0	0	0	0	0	0	0	0	0	0	0	0	0	0	0	0	0
Isoleucine	0.0521103	0.0576223	0.0457723	0.0537042	0.0444985	0.0495158	0.0481041	0.0478544	0.0462252	0.0407352	0.0423905	0.0483316	0.0458082	0.0447595	0.05095	0.0404319								2.1684e-19	0	0	0	0	0	0	0	0	0	0	0	0	0	0	0	0	0
Isoleucine	0.254175	0.252367	0.27388	0.269307	0.275694	0.263106	0.257652	0.256923	0.265593	0.281585	0.251056	0.230225	0.250091	0.286018	0.270989	0.268639								0.0104607	0.00778383	0	0	0	0	0	0	0	0	0	0	0	0	0	0	0	0
Isoleucine 218
Isoleucine 218
Isoleucine 218
Proline	0.925285	0.958873	0.934009	0.913928	0.874734	0.912267	0.904091	0.899168	0.907692	0.856618	0.947395	0.966403	0.946826	0.917074	0.908514	0.897788								0.717343	0.691997	0	0	0	0	0	0	0	0	0	0	0	0	0	0	0	0
Proline	0.0249391	0.0152396	0.0256867	0.0216247	0.0217404	0.0343663	0.0488628	0.0448898	0.0254362	0.0249062	0.0198806	0.0122526	0.0201527	0.0325274	0.0421776	0.0252566								0.234761	0.257363	0	0	0	0	0	0	0	0	0	0	0	0	0	0	0	0
Proline	0.0109665	0.00832775	0.0116788	0.0109744	0.00914677	0.0127152	0.0145913	0.0172085	0.0148963	0.0121601	0.0109917	0.00756262	0.0101525	0.0157535	0.0176096	0.0124115								0.047896	0.0506403	0	0	0	0	0	0	0	0	0	0	0	0	0	0	0	0
Proline	0.00938394	0.00620991	0.0115558	0.0113127	0.00751302	0.022592	0.0229003	0.0250629	0.0105491	0.0103448	0.0104493	0.00396354	0.0103327	0.0228831	0.0268791	0.0175567								1.954e-19	1.78875e-19	0	0	0	0	0	0	0	0	0	0	0	0	0	0	0	0
Proline	0.0294254	0.0113497	0.0170697	0.0421601	0.0868658	0.0180595	0.00955422	0.0136711	0.0414261	0.0959713	0.0112839	0.00981777	0.012536	0.0117621	0.00481979	0.0469871								0	0	0	0	0	0	0	0	0	0	0	0	0	0	0	0	0	0
Glycine	1	1	1	1	1	1	1	1	1	1	1	1	1	1	1	1								1	1	0	0	0	0	0	0	0	0	0	0	0	0	0	0	0	0
Glycine	3.98986e-17	0	6.245e-17	5.89806e-17	0	3.20924e-17	5.0307e-17	8.67362e-17	6.245e-17	0	0	0	0	0	1.94072e-17	3.03577e-17								2.94903e-17	7.80626e-18	0	0	0	0	0	0	0	0	0	0	0	0	0	0	0	0
Glycine	4.45259e-19	0	0	9.30054e-19	8.06364e-19	4.94222e-19	2.71051e-19	2.1684e-19	0	0	1.34317e-19	0	2.67514e-20	7.11237e-17	8.06891e-20	6.65322e-19								5.53995e-19	4.77712e-19	0	0	0	0	0	0	0	0	0	0	0	0	0	0	0	0
Succinate	0.876365	0.879599	0.878474	0.875408	0.911889	0.886356	0.86243	0.856046	0.814234	0.805367	0.841488	0.852325	0.838218	0.789448	0.802385	0.784147								0.96699	0.970153	0	0	0	0	0	0	0	0	0	0	0	0	0	0	0	0
Succinate	0.00939189	0.01998	0.0164186	0.0127869	0.0122515	0.0159847	0.0195955	0.0219938	0.0255103	0.0204174	0.0210948	0.0342164	0.0245485	0.0259223	0.0225127	0.0292344								0.022783	0.0225234	0	0	0	0	0	0	0	0	0	0	0	0	0	0	0	0
Succinate	0.0415347	0.038386	0.0345866	0.0403029	0.0302349	0.0327119	0.0421496	0.0497955	0.0606578	0.0605814	0.0480056	0.0432181	0.0492721	0.0693523	0.0684023	0.0672379								0.0102274	0.00732405	0	0	0	0	0	0	0	0	0	0	0	0	0	0	0	0
Succinate	0.0243656	0.0147426	0.0141017	0.0148733	0.00672619	0.012682	0.0166824	0.00885453	0.0144464	0.0228991	0.0189948	0.0116372	0.0169322	0.0163071	0.0193168	0.0160883								7.79156e-19	7.2556e-19	0	0	0	0	0	0	0	0	0	0	0	0	0	0	0	0
Succinate	0.0483428	0.0472929	0.0564188	0.056629	0.0388985	0.0522654	0.0591427	0.0633096	0.0851509	0.0907352	0.0704164	0.0586032	0.0710293	0.0989702	0.087383	0.103292								0	0	0	0	0	0	0	0	0	0	0	0	0	0	0	0	0	0
nor-Leucine	0.303745	0.301576	0.288544	0.301164	0.314561	0.299779	0.310424	0.295948	0.296583	0.290458	0.298564	0.313282	0.305006	0.302688	0.300704	0.296034								0.746043	0.704842	0	0	0	0	0	0	0	0	0	0	0	0	0	0	0	0
nor-Leucine	0.165571	0.157212	0.153708	0.14187	0.144221	0.153047	0.163445	0.167389	0.160765	0.160717	0.169587	0.157037	0.16047	0.151543	0.159722	0.159896								0.199182	0.237957	0	0	0	0	0	0	0	0	0	0	0	0	0	0	0	0
nor-Leucine	0.131803	0.12046	0.142166	0.133619	0.123121	0.146664	0.123938	0.127152	0.126324	0.121098	0.114741	0.141064	0.117684	0.115533	0.11846	0.11687								0.0429706	0.0486913	0	0	0	0	0	0	0	0	0	0	0	0	0	0	0	0
nor-Leucine	0.0974407	0.108922	0.103204	0.104099	0.0944304	0.0941244	0.101775	0.110372	0.108874	0.10598	0.124859	0.108622	0.121095	0.106398	0.10246	0.123298								1.18784e-20	2.70064e-19	0	0	0	0	0	0	0	0	0	0	0	0	0	0	0	0
nor-Leucine	0.0558851	0.0594867	0.0466103	0.0557689	0.0459939	0.049665	0.0466045	0.0462477	0.0474741	0.0429742	0.0434594	0.0488904	0.0483267	0.0450033	0.0483708	0.0388324								0	0	0	0	0	0	0	0	0	0	0	0	0	0	0	0	0	0
nor-Leucine	0.245555	0.252342	0.265768	0.263479	0.277672	0.25672	0.253813	0.252892	0.25998	0.278773	0.24879	0.231106	0.247419	0.278834	0.270283	0.26507								0.0118045	0.00850973	0	0	0	0	0	0	0	0	0	0	0	0	0	0	0	0
Picolinate
Picolinate
Picolinate
Picolinate
Picolinate
Picolinate
Picolinate
Uracil	0.955792	0.951434	0.945973	0.938068	0.93777	0.9379	0.928889	0.930859	0.92924	0.933584	0.947161	0.952028	0.95255	0.957408	0.955458	0.95612								0.826754	0.790664	0	0	0	0	0	0	0	0	0	0	0	0	0	0	0	0
Uracil	0.00371196	0.00432453	0.00699881	0.00803208	0.00640286	0.00521788	0.00850237	0.00842518	0.00907171	0.00660795	0.00452477	0.00816139	0.0111615	0.00604586	0.00767214	0.00808655								0.138287	0.169343	0	0	0	0	0	0	0	0	0	0	0	0	0	0	0	0
Uracil	0.0260109	0.0298417	0.0313699	0.0348211	0.037303	0.0360411	0.0401965	0.0388485	0.039401	0.0391	0.0295078	0.0262756	0.0228119	0.0234001	0.0245205	0.022051								0.0349588	0.0399932	0	0	0	0	0	0	0	0	0	0	0	0	0	0	0	0
Uracil	0.0122457	0.0113695	0.0128233	0.0153952	0.0151077	0.0163458	0.0182493	0.0177136	0.0173962	0.016034	0.0149523	0.0109679	0.0103246	0.0104201	0.00910693	0.00952581								2.87995e-18	2.84647e-18	0	0	0	0	0	0	0	0	0	0	0	0	0	0	0	0
Uracil	0.0022389	0.00303036	0.00283534	0.00368368	0.00341688	0.00449474	0.00416233	0.00415378	0.00489142	0.00467373	0.00385418	0.00256761	0.00315175	0.00272639	0.00324206	0.00421646								0	0	0	0	0	0	0	0	0	0	0	0	0	0	0	0	0	0
Fumarate	0.931921	0.941002	0.933925	0.941852	0.918929	0.927083	0.942022	0.94082	0.940155	0.943583	0.949817	0.96389	0.947885	0.930851	0.921107	0.934021								0.790928	0.770157	0	0	0	0	0	0	0	0	0	0	0	0	0	0	0	0
Fumarate	0.00690987	0.0045636	0.00771485	0	0.00408568	0.00177535	0.00641931	0.00786275	0.00487945	0.00189157	0.00694206	0.00869091	0.00395202	0.00728657	0.0100757	0.00884353								0.163812	0.181011	0	0	0	0	0	0	0	0	0	0	0	0	0	0	0	0
Fumarate	0.016996	0.0147689	0.014925	0.015671	0.0175336	0.0176911	0.0109162	0.0135882	0.0178719	0.0135056	0.0124405	0.00927442	0.0150693	0.0160895	0.0161641	0.0137427								0.0452603	0.0488313	0	0	0	0	0	0	0	0	0	0	0	0	0	0	0	0
Fumarate	0.0156528	0.0148317	0.0147076	0.0118138	0.0203525	0.0168789	0.0127684	0.00915152	0.0113101	0.0108814	0.00958654	0.00695498	0.0103217	0.0146821	0.0169585	0.0145485								2.71588e-18	2.68691e-18	0	0	0	0	0	0	0	0	0	0	0	0	0	0	0	0
Fumarate	0.0285202	0.024834	0.0287272	0.0306635	0.0390989	0.036572	0.0278741	0.0285771	0.0257833	0.0301384	0.0212139	0.0111893	0.0227723	0.0310909	0.0356946	0.0288439								0	0	0	0	0	0	0	0	0	0	0	0	0	0	0	0	0	0
Serine	0.550178	0.640187	0.487516	0.487414	0.458061	0.442519	0.460531	0.422595	0.518079	0.496274	0.582776	0.941948	0.583629	0.540776	0.575227	0.520543								0.750583	0.709293	0	0	0	0	0	0	0	0	0	0	0	0	0	0	0	0
Serine	0.42155	0.333037	0.483819	0.483898	0.515358	0.528609	0.507542	0.549349	0.455037	0.475448	0.391437	0.0565928	0.39477	0.433666	0.402077	0.452381								0.202476	0.235848	0	0	0	0	0	0	0	0	0	0	0	0	0	0	0	0
Serine	0.0282719	0.026776	0.0286652	0.0286879	0.0265817	0.0288721	0.0319268	0.0280561	0.0268832	0.0282782	0.0257872	0.00145956	0.0216007	0.0255581	0.0226953	0.0270762								0.0469407	0.0548587	0	0	0	0	0	0	0	0	0	0	0	0	0	0	0	0
Serine 218	0.947503	0.944153	0.912628	0.918543	0.901555	0.892508	0.91579	0.883875	0.924442	0.916184	0.933681	0.998521	0.935309	0.924311	0.947257	0.937253								0.873257	0.843647	0	0	0	0	0	0	0	0	0	0	0	0	0	0	0	0
Serine 218	0.0524974	0.0558466	0.0873719	0.0814566	0.0984452	0.107492	0.0842105	0.116125	0.0755584	0.083816	0.0663191	0.00147896	0.0646914	0.0756886	0.0527435	0.0627466								0.102927	0.127676	0	0	0	0	0	0	0	0	0	0	0	0	0	0	0	0
Serine 218	0	0	0	0	0	0	0	0	0	0	0	0	0	0	0	0								0.0238156	0.0286773	0	0	0	0	0	0	0	0	0	0	0	0	0	0	0	0
Threonine	0.468654	0.557562	0.526399	0.574708	0.628087	0.474773	0.387225	0.426075	0.583759	0.607128	0.628768	0.751713	0.634045	0.560391	0.536163	0.608372								0.767328	0.764864	0	0	0	0	0	0	0	0	0	0	0	0	0	0	0	0
Threonine	0.351201	0.332255	0.310843	0.333556	0.296409	0.362283	0.34088	0.332315	0.310352	0.290165	0.295705	0.248287	0.275715	0.291071	0.334668	0.275208								0.232672	0.235136	0	0	0	0	0	0	0	0	0	0	0	0	0	0	0	0
Threonine	0.180145	0.110182	0.162757	0.0917364	0.0755041	0.162944	0.271895	0.24161	0.105889	0.102707	0.0755272	0	0.0902396	0.148538	0.129169	0.116419								0	0	0	0	0	0	0	0	0	0	0	0	0	0	0	0	0	0
Thymine	0.560728	0.533559	0.356469	0.306855	0.310516	0.325196	0.300125	0.327896	0.436494	0.536726	0.541563	0.830193	0.673495	0.645497	0.715457	0.672481								0.760354	0.719755	0	0	0	0	0	0	0	0	0	0	0	0	0	0	0	0
Thymine	0.30293	0.41067	0.58899	0.641905	0.637674	0.626031	0.64277	0.615968	0.508189	0.408149	0.371893	0.118994	0.246508	0.266757	0.214772	0.232616								0.187778	0.222316	0	0	0	0	0	0	0	0	0	0	0	0	0	0	0	0
Thymine	0.061673	0.0203231	0.0205703	0.0208995	0.0184503	0.0172164	0.0211096	0.0186966	0.0164168	0.019806	0.0244336	0.0119855	0.0322379	0.026793	0.0193299	0.0281005								0.043222	0.05105	0	0	0	0	0	0	0	0	0	0	0	0	0	0	0	0
Thymine	0.0475905	0.020015	0.0194478	0.0190285	0.020354	0.019954	0.0219206	0.0216004	0.0233165	0.0218898	0.0403919	0.0273835	0.0300871	0.0388278	0.031029	0.042189								3.54221e-20	3.48418e-20	0	0	0	0	0	0	0	0	0	0	0	0	0	0	0	0
Thymine	0.0230111	0.0122409	0.0114207	0.00882094	0.0103732	0.00931209	0.0112295	0.0122462	0.0126066	0.0120221	0.0163798	0.00870148	0.0140667	0.0163901	0.0149493	0.0180582								0.00864542	0.00687903	0	0	0	0	0	0	0	0	0	0	0	0	0	0	0	0
Thymine	0.00406733	0.00319189	0.0031021	0.00249111	0.00263248	0.00229091	0.00284485	0.00359263	0.0029765	0.00140734	0.00533869	0.00274241	0.00360517	0.00573416	0.00446272	0.00655521								0	0	0	0	0	0	0	0	0	0	0	0	0	0	0	0	0	0
bAlanine	0.772697	0.786193	0.811889	0.827375	0.809516	0.851347	0.83866	0.819473	0.81857	0.795791	0.839167	0.866241	0.829765	0.770842	0.812382	0.784729								0.95608	0.945498	0	0	0	0	0	0	0	0	0	0	0	0	0	0	0	0
bAlanine	0.227303	0.213807	0.188111	0.172625	0.190484	0.148653	0.16134	0.180527	0.18143	0.204209	0.160833	0.133759	0.170235	0.229158	0.187618	0.215271								0.0439198	0.0545025	0	0	0	0	0	0	0	0	0	0	0	0	0	0	0	0
Erythrose	0.171359	0.18149	0.163975	0.15669	0.228135	0.200032	0.180817	0.182929	0.15158	0.149936	0.162149	0.1734	0.169095	0.142119	0.116756	0.142873								0.981918	0.981323	0	0	0	0	0	0	0	0	0	0	0	0	0	0	0	0
Erythrose	0	0	0	0	0	0	0	0	0	0	0	0	0	0	0	0								0	0	0	0	0	0	0	0	0	0	0	0	0	0	0	0	0	0
Erythrose	0.828641	0.81851	0.836025	0.84331	0.771865	0.799968	0.819183	0.817071	0.84842	0.850064	0.837851	0.8266	0.830905	0.857881	0.883244	0.857127								0.0180815	0.0186771	0	0	0	0	0	0	0	0	0	0	0	0	0	0	0	0
Malate	0.923611	0.931915	0.926051	0.925972	0.921109	0.914414	0.902062	0.890076	0.915768	0.927962	0.935498	0.955836	0.929038	0.92001	0.888632	0.937475								0.962829	0.95863	0	0	0	0	0	0	0	0	0	0	0	0	0	0	0	0
Malate	0.0133986	0.0134075	0.0143067	0.0143136	0.0120622	0.0148545	0.0232382	0.0284777	0.0211592	0.0118267	0.0128875	0.00801253	0.0130806	0.0103722	0.0363664	0.00837314								0	0	0	0	0	0	0	0	0	0	0	0	0	0	0	0	0	0
Malate	0.0344328	0.0331454	0.029681	0.0310205	0.0311087	0.0348422	0.0374084	0.0355079	0.0345318	0.0302893	0.0312744	0.0261156	0.0353045	0.0335136	0.0341343	0.0248337								0.0359876	0.0397612	0	0	0	0	0	0	0	0	0	0	0	0	0	0	0	0
Malate	0.00633004	0.00417878	0.00604831	0.00517885	0.00887821	0.00688017	0.00693024	0.013293	0.00601482	0.00777567	0.00365311	0.00288776	0.00391713	0.00575041	0.00774238	0.0083743								3.59142e-05	3.98179e-05	0	0	0	0	0	0	0	0	0	0	0	0	0	0	0	0
Malate	0.0222271	0.0173531	0.0239131	0.0235155	0.0268414	0.029009	0.0303614	0.0326458	0.0225267	0.0221468	0.0166868	0.00714816	0.0186595	0.0303539	0.0331252	0.0209437								0.00114779	0.00156944	0	0	0	0	0	0	0	0	0	0	0	0	0	0	0	0
Aspartate	0.578844	0.678196	0.533919	0.662328	0.239284	0.37129	0.357686	0.432132	0.618715	0.536712	0.744769	0.959187	0.700948	0.464344	0.311261	0.456333								0.991864	0.990681	0	0	0	0	0	0	0	0	0	0	0	0	0	0	0	0
Aspartate	0.175792	0.134993	0.107593	6.5705e-19	0.211939	0.126184	0.078095	0.230197	0.134147	0.196685	0.129505	0.0251457	0.122462	0.108109	0.188417	0.0861636								0.00324851	0.00687654	0	0	0	0	0	0	0	0	0	0	0	0	0	0	0	0
Aspartate	0.213603	0.135267	0.24807	0.329999	0.481752	0.398072	0.402324	0.237025	0.230969	0.245191	0.125726	0.0129458	0.146263	0.3291	0.396998	0.397971								0.00142332	0.000746246	0	0	0	0	0	0	0	0	0	0	0	0	0	0	0	0
Aspartate	0	0.0282214	0.0302904	9.84268e-20	0	0.0602862	0	0.0324411	0	0	9.67119e-20	0.00251907	0	5.66121e-19	0.0796864	0								0.00339872	0.00169604	0	0	0	0	0	0	0	0	0	0	0	0	0	0	0	0
Aspartate	0.0317613	0.0233225	0.0801274	0.00767256	0.0670244	0.044168	0.161895	0.0682041	0.0161689	0.0214125	0	0.00020272	0.0303269	0.0984468	0.023637	0.0595322								6.54137e-05	0	0	0	0	0	0	0	0	0	0	0	0	0	0	0	0	0
Aspartate 232	0.881877	0.930453	0.854827	0.899463	0.80963	0.800702	0.795101	0.754203	0.920638	0.882292	0.960874	0.951551	0.974156	0.862808	0.836301	0.926455								0.739186	0.698633	0	0	0	0	0	0	0	0	0	0	0	0	0	0	0	0
Aspartate 232	0.0476062	0.0258406	0.0581939	0.0380745	0.0686583	0.0593243	0.0768069	0.103102	0.0392634	0.0540183	0.0206323	0.0364238	0.0114696	0.0765723	0.0885549	0.0298443								0.208602	0.240797	0	0	0	0	0	0	0	0	0	0	0	0	0	0	0	0
Aspartate 232	0.0464147	0.0325788	0.0644708	0.044495	0.0898271	0.11792	0.0929739	0.107588	0.0206063	0.0401498	0.0126868	0.0116009	0.00725699	0.0339871	0.0437882	0.022438								0.0522128	0.06057	0	0	0	0	0	0	0	0	0	0	0	0	0	0	0	0
Aspartate 232	0.0241023	0.0111275	0.0225079	0.0179675	0.0318849	0.0220533	0.0351182	0.0351072	0.0194927	0.0235402	0.00580648	0.000424311	0.00711755	0.0266324	0.0313555	0.0212628								5.40408e-18	5.26299e-18	0	0	0	0	0	0	0	0	0	0	0	0	0	0	0	0
Methionine	0.27073	0.478924	0.232749	0.23388	0.137676	0.142442	0.163263	0.147261	0.252063	0.192769	0.527153	0.870673	0.495044	0.176353	0.14433	0.226599								0.982342	0.983083	0	0	0	0	0	0	0	0	0	0	0	0	0	0	0	0
Methionine	0.0630569	0.0881787	0.0930562	0.0872589	0.0624742	0.0763497	0.0712857	0.094229	0.11279	0.0790769	0.0358524	0.120532	0.0842995	0.106606	0.0792658	0.0655448								0.0176576	0.0169171	0	0	0	0	0	0	0	0	0	0	0	0	0	0	0	0
Methionine	0.440539	0.266563	0.444754	0.451923	0.525222	0.516955	0.540726	0.527195	0.418547	0.534642	0.296407	2.58396e-19	0.286437	0.489359	0.535886	0.488321								0	0	0	0	0	0	0	0	0	0	0	0	0	0	0	0	0	0
Methionine	0.100466	0.0797946	0.0900536	0.100714	0.128836	0.141694	0.111722	0.108364	0.0955605	0.0825983	0.048976	6.59136e-20	0.0589212	0.114248	0.129867	0.0831967								0	0	0	0	0	0	0	0	0	0	0	0	0	0	0	0	0	0
Methionine	0.125207	0.0865401	0.139387	0.126224	0.145791	0.12256	0.113004	0.122951	0.121039	0.110914	0.091612	0.00879522	0.0752978	0.113433	0.110651	0.136338								1.42797e-18	1.37509e-18	0	0	0	0	0	0	0	0	0	0	0	0	0	0	0	0
Methionine	2.22618e-22	0	7.22701e-21	6.79674e-21	4.28147e-21	1.0531e-19	1.11363e-19	8.46386e-21	6.99652e-21	9.53904e-21	5.63035e-21	2.10516e-19	0	9.45717e-23	1.40814e-19	7.78776e-21								0	0	0	0	0	0	0	0	0	0	0	0	0	0	0	0	0	0
Methionine 176	0.544701	0.766218	0.504637	0.455916	0.201222	0.171111	0.279692	0.268917	0.447871	0.280749	0.76927	0.939751	0.777395	0.358559	0.242478	0.458036								0.880818	0.850836	0	0	0	0	0	0	0	0	0	0	0	0	0	0	0	0
Methionine 176	0.16897	0.0868009	0.192499	0.220887	0.321607	0.317241	0.264288	0.280313	0.198388	0.238504	0.082213	0.040754	0.0775745	0.190094	0.227345	0.182999								0.0816486	0.102193	0	0	0	0	0	0	0	0	0	0	0	0	0	0	0	0
Methionine 176	0.0657246	0.0298322	0.0678839	0.0749688	0.109654	0.125289	0.108142	0.114509	0.0816973	0.106011	0.0280593	0.00184456	0.0305839	0.114239	0.104479	0.0834491								0.0375335	0.0469702	0	0	0	0	0	0	0	0	0	0	0	0	0	0	0	0
Methionine 176	0.164227	0.0804935	0.169118	0.177263	0.279484	0.292126	0.257576	0.247332	0.206499	0.289358	0.0889981	0.0124334	0.0801385	0.253836	0.32196	0.203647								8.22109e-20	9.29304e-20	0	0	0	0	0	0	0	0	0	0	0	0	0	0	0	0
Methionine 176	0.0563772	0.0366556	0.0658622	0.0709655	0.0880342	0.0942335	0.0903023	0.0889294	0.0655448	0.0853765	0.0314599	0.00521725	0.0343081	0.0832722	0.103739	0.0718686								0	0	0	0	0	0	0	0	0	0	0	0	0	0	0	0	0	0
5-oxoproline	0.950849	0.954526	0.942972	0.952359	0.940388	0.928145	0.913149	0.904172	0.951885	0.957418	0.969148	0.917008	0.97248	0.949178	0.932433	0.967709								0.788198	0.772314	0	0	0	0	0	0	0	0	0	0	0	0	0	0	0	0
5-oxoproline	0.0133494	0.0140204	0.0144835	0.0140157	0.0124377	0.0138797	0.0169436	0.0181501	0.0185632	0.0134894	0.0134858	0.0599248	0.0126255	0.0189676	0.0273255	0.0120135								0.144454	0.160015	0	0	0	0	0	0	0	0	0	0	0	0	0	0	0	0
5-oxoproline	0.0148714	0.0130208	0.0141281	0.0119884	0.0130532	0.0138716	0.0169996	0.0190483	0.0152409	0.0143913	0.0106647	0.019749	0.00859614	0.0161892	0.0204157	0.0109715								0.0385887	0.0417457	0	0	0	0	0	0	0	0	0	0	0	0	0	0	0	0
5-oxoproline	0.00244135	0.0016908	0.00210584	0.00166163	0.00219817	0.00218351	0.00306991	0.00312717	0.00158822	0.00187955	0.000987707	6.74894e-20	0.00107235	0.0019347	0.0032894	0.00141747								0	1.29666e-19	0	0	0	0	0	0	0	0	0	0	0	0	0	0	0	0
5-oxoproline	0.0184889	0.0167424	0.0263104	0.0199749	0.0319228	0.0419205	0.0498381	0.0555027	0.0127231	0.0128218	0.0057141	0.00331827	0.0052259	0.013731	0.016536	0.00788843								0.0287599	0.0259254	0	0	0	0	0	0	0	0	0	0	0	0	0	0	0	0
GABA
GABA
GABA
GABA
GABA
Cysteine 218	0.0914164	0.0848383	0.096291	0.100266	0.0759943	0.0786296	0.0977794	0.0977027	0.0923482	0.09301	0.135613	0.453601	0.123856	0.10907	0.0806719	0.101521								0.475727	0.475945	0	0	0	0	0	0	0	0	0	0	0	0	0	0	0	0
Cysteine 218	0.00828999	0.000713461	0.0294138	0.0134373	1.26603e-18	1.26059e-18	0.0172479	0.0315446	0.000662182	0.016873	0.00187914	0	0.021502	0.089739	1.25538e-18	0.015366								0	0	0	0	0	0	0	0	0	0	0	0	0	0	0	0	0	0
Cysteine 218	0.900294	0.914448	0.874295	0.886297	0.924006	0.92137	0.884973	0.870753	0.90699	0.890117	0.862508	0.546399	0.854642	0.801191	0.919328	0.883113								0.524273	0.524055	0	0	0	0	0	0	0	0	0	0	0	0	0	0	0	0
Cysteine	0.830292	0.894439	0.79492	0.787848	0.911768	0.901774	0.780866	0.772887	0.851576	0.841095	0.822719	0.986126	0.837612	0.692603	0.886607	0.785514								0.984782	0.984157	0	0	0	0	0	0	0	0	0	0	0	0	0	0	0	0
Cysteine	0.164747	0.105561	0.189486	0.191192	0.088232	0.0982255	0.211202	0.214438	0.148424	0.158905	0.156484	0.0138741	0.147445	0.285706	0.113393	0.192654								0.0152177	0.0158431	0	0	0	0	0	0	0	0	0	0	0	0	0	0	0	0
Cysteine	0.00496042	1.04757e-19	0.0155944	0.02096	1.62666e-19	1.43592e-19	0.00793208	0.0126749	0	0	0.0207968	3.17468e-19	0.0149432	0.021691	1.09578e-19	0.0218324								1.0842e-19	3.04402e-19	0	0	0	0	0	0	0	0	0	0	0	0	0	0	0	0
Creatinine	0.5463	0.506768	0.549433	0.554406	0.550851	0.53524	0.580058	0.595535	0.516624	0.536616	0.529055	0.511074	0.554385	0.559802	0.610693	0.566902								0.325054	0.377515	0	0	0	0	0	0	0	0	0	0	0	0	0	0	0	0
Creatinine	0.244766	0.280602	0.261611	0.248395	0.289482	0.308907	0.2593	0.245173	0.30706	0.284554	0.334389	0.329979	0.274444	0.279349	0.247547	0.299622								0.101006	0.161512	0	0	0	0	0	0	0	0	0	0	0	0	0	0	0	0
Creatinine	0.0183911	0.0233156	0.0342356	0.0326814	0.0141555	0.0253254	0.0176807	0.023125	0.0498584	0.0223425	0.037405	0.00235102	0.0355033	0.0537078	0.0361342	0.0236215								0.0518849	0.027808	0	0	0	0	0	0	0	0	0	0	0	0	0	0	0	0
Creatinine	0.0810622	0.0854389	0.0453942	0.0762379	0.0633433	0.0500834	0.0688029	0.0461133	0.0684006	0.0573469	0.026088	0.0749044	0.0578915	0.0360158	0.051456	0.0173865								0.41914	0.3452	0	0	0	0	0	0	0	0	0	0	0	0	0	0	0	0
Creatinine	0.109481	0.103875	0.109326	0.0882798	0.0821683	0.0804439	0.0741585	0.0900538	0.0580575	0.0991404	0.0730631	0.0816913	0.0777767	0.071125	0.0541698	0.0924679								0.102915	0.0879651	0	0	0	0	0	0	0	0	0	0	0	0	0	0	0	0
Deoxyribose	0.453016	0.614635	0.65017	0.542517	0.729303	0.627665	0.900627	0.435456	0.838222	0.367629	0.766026	0.695414	0.397031	0.376958	0.687464	0.673391								0.710741	0.646151	0	0	0	0	0	0	0	0	0	0	0	0	0	0	0	0
Deoxyribose	0	0.0860153	0	0.00172034	0	0	0	3.94419e-18	0	0.152307	0	0	0	0	0	0								0.143254	0.187386	0	0	0	0	0	0	0	0	0	0	0	0	0	0	0	0
Deoxyribose	0.546984	0.257319	0.34983	0.241405	0.227073	0.214597	0.0993731	0.564544	0.161757	0.480064	0.233974	0.304586	0.602969	0.623042	0.0687887	0.326609								0.0886349	0.108461	0	0	0	0	0	0	0	0	0	0	0	0	0	0	0	0
Deoxyribose	2.63407e-18	0.0420311	7.98833e-20	0.214357	0.0436236	0.157738	8.26549e-19	8.34233e-19	2.11566e-05	1.82942e-19	1.44162e-19	1.57067e-19	1.15106e-18	1.43826e-18	0.243748	9.11271e-20								0.0573705	0.0580025	0	0	0	0	0	0	0	0	0	0	0	0	0	0	0	0
aKG	0.335093	0.256926	0.412623	0.437496	0.403229	0.394262	0.45258	0.448594	0.291777	0.242875	0.649447	0.4833	0.34722	0.287624	0.27268	0.437146								0.6629	0.704053	0	0	0	0	0	0	0	0	0	0	0	0	0	0	0	0
aKG	0.0808369	0.0832996	0.0831916	0.121924	0.114702	0.106511	0.171599	0.0568499	0.0582037	0.0637562	0.0432729	0.0240345	0.0331927	0.067974	0.155731	0.0932399								1.05957e-19	5.47582e-20	0	0	0	0	0	0	0	0	0	0	0	0	0	0	0	0
aKG	0.0424807	0.0673651	0.0567969	0.0164192	0.139051	0.0790651	0	0.0679395	0.0891815	0.0247705	0.0295575	0.00737177	0.0439815	0.0503439	0.0244271	0.0344623								7.53572e-20	1.96348e-20	0	0	0	0	0	0	0	0	0	0	0	0	0	0	0	0
aKG	0.450697	0.517247	0.359988	0.373294	0.213014	0.333039	0.256332	0.287616	0.457232	0.595949	0.194073	0.430075	0.478859	0.513166	0.433393	0.345593								0.33109	0.291701	0	0	0	0	0	0	0	0	0	0	0	0	0	0	0	0
aKG	0.0146743	0.046224	0.0159088	3.62509e-20	0.050588	0.0443654	0.060194	0.03308	0.0507589	0.0217128	0.0134271	0.0238504	0.0350473	0.0575315	0.0391676	0.00264016								0.00601004	0.00424605	0	0	0	0	0	0	0	0	0	0	0	0	0	0	0	0
aKG	0.076219	0.0289386	0.0714919	0.0508666	0.0794166	0.042757	0.0592955	0.105921	0.0528477	0.0509367	0.0702225	0.0313683	0.0616996	0.0233606	0.0746017	0.0869187								4.55655e-20	1.20548e-19	0	0	0	0	0	0	0	0	0	0	0	0	0	0	0	0
PEP	0.926511	0.915515	0.926705	0.916417	0.92341	0.942777	0.908323	0.92275	0.900482	0.89831	0.92084	0.906957	0.941584	0.932648	0.912994	0.924745								0.969799	0.960146	0	0	0	0	0	0	0	0	0	0	0	0	0	0	0	0
PEP	0.00199426	0.0124949	0.00441188	0.00447058	0.00159958	0	0.0115694	0.00720838	0.00316822	0.0120605	0.00951033	0.00299274	0.00601377	0	0.0130713	0.0121248								0.0234909	0.0318927	0	0	0	0	0	0	0	0	0	0	0	0	0	0	0	0
PEP	0.00312786	0.0152443	0.00666149	0.00848397	0.0165431	0.00773625	0.0161502	0.0202866	0.00705034	0.00949394	0.0108911	0.00986874	0.00250883	0.0260497	0.0177663	0.0185447								0.00670973	0.00796092	0	0	0	0	0	0	0	0	0	0	0	0	0	0	0	0
PEP	0.0683668	0.0567453	0.0622217	0.070628	0.0584475	0.0494866	0.0639579	0.0497552	0.0892996	0.0801357	0.0587585	0.0801814	0.0498936	0.0413025	0.0561681	0.0445854								0	5.95692e-20	0	0	0	0	0	0	0	0	0	0	0	0	0	0	0	0
Glutamate	0.734662	0.771485	0.676817	0.825618	0.517805	0.757874	0.761683	0.706799	0.802912	0.85389	0.947375	0.969568	0.953078	0.732233	0.639557	0.772846								0.99104	0.987048	0	0	0	0	0	0	0	0	0	0	0	0	0	0	0	0
Glutamate	0.107446	0.0264091	0.120252	0.0194291	0.103031	4.28366e-19	8.21535e-21	0.0705468	0.00949624	0.0351951	0.022437	0.00956089	0.00441502	0.104357	0.00317671	3.9503e-20								0.00125619	0.0022906	0	0	0	0	0	0	0	0	0	0	0	0	0	0	0	0
Glutamate	4.83236e-20	0.0723353	1.40987e-20	0.0236366	0.237761	0.0242004	0.0085333	3.12388e-21	0.0253688	0	0	0.00961525	0.00965237	0	1.67661e-19	0.0217643								3.70368e-20	2.27372e-20	0	0	0	0	0	0	0	0	0	0	0	0	0	0	0	0
Glutamate	0	0.030762	0.0167633	0	0.092545	1.01611e-19	0.00897619	0.0562153	0.025862	0	0.00439587	0.0023814	0.00466257	0	2.01076e-20	0.0555886								0.000776584	0.00180296	0	0	0	0	0	0	0	0	0	0	0	0	0	0	0	0
Glutamate	0.0917716	0.00399628	0.169095	0.00714954	0.0272437	0.19847	0.150107	0.0399879	0.0238143	0.0619274	0.00508244	0.000711935	0.00513472	0.0377018	0.00153458	0.0269828								0.00558942	0.00641659	0	0	0	0	0	0	0	0	0	0	0	0	0	0	0	0
Glutamate	0.0661211	0.0950124	0.0170726	0.124167	0.0216143	0.0194554	0.0706995	0.126451	0.112547	0.0489877	0.0207094	0.00816251	0.0230576	0.125709	0.355732	0.122818								0.00133756	0.00244221	0	0	0	0	0	0	0	0	0	0	0	0	0	0	0	0
Glutamate 246	0.588748	0.872625	0.633336	0.741694	0.659578	0.572101	0.509376	0.41829	0.845508	0.780065	0.964866	0.97464	0.952451	0.575162	0.53342	0.712096								0.983437	0.982514	0	0	0	0	0	0	0	0	0	0	0	0	0	0	0	0
Glutamate 246	0.0835361	0.0300043	0.0849749	0.0612712	0.0923598	0.115364	0.0883288	0.117417	0.0347838	0.0249868	0.0147308	0.0151829	0.00936768	0.0678411	0.111718	0.044026								0.00693423	0.00589664	0	0	0	0	0	0	0	0	0	0	0	0	0	0	0	0
Glutamate 246	0.142149	0.045423	0.0952388	0.0920219	0.0592131	0.078947	0.147812	0.222452	0.0591386	0.0912343	0.0147773	0.00900194	0.0292593	0.153833	0.117487	0.122524								0.00702782	0.0092043	0	0	0	0	0	0	0	0	0	0	0	0	0	0	0	0
Glutamate 246	0.155004	0.0414163	0.155616	0.0848337	0.149537	0.197205	0.21358	0.19738	0.0487885	0.0838106	0.00476459	0.000740217	0.00699739	0.172921	0.208732	0.101409								0.00227262	0.00205251	0	0	0	0	0	0	0	0	0	0	0	0	0	0	0	0
Glutamate 246	0.0305625	0.0105312	0.0308341	0.0201788	0.0393121	0.036384	0.0409028	0.0444608	0.0117807	0.0199032	0.000861573	0.000435052	0.00192454	0.0302419	0.0286415	0.0199446								0.00032832	0.000332573	0	0	0	0	0	0	0	0	0	0	0	0	0	0	0	0
Phenylalanine	0.21803	0.286763	0.216059	0.220296	0.21177	0.19744	0.189912	0.195361	0.217052	0.186054	0.303041	0.900064	0.339658	0.188684	0.171833	0.224745								0.897553	0.867561	0	0	0	0	0	0	0	0	0	0	0	0	0	0	0	0
Phenylalanine	0.425916	0.357723	0.424732	0.41796	0.423423	0.435941	0.451384	0.449039	0.421092	0.462561	0.360688	0.041262	0.35157	0.467749	0.48881	0.433356								0.0887878	0.116456	0	0	0	0	0	0	0	0	0	0	0	0	0	0	0	0
Phenylalanine	0.0274	0.0200035	0.0286169	0.0296893	0.0249833	0.0329703	0.0319581	0.0240823	0.0328317	0.0338837	0.0257275	0.00361593	0.0244663	0.032816	0.0235067	0.030769								0.00958622	0.0120278	0	0	0	0	0	0	0	0	0	0	0	0	0	0	0	0
Phenylalanine	0.0900691	0.0827843	0.0909875	0.091677	0.0941726	0.0918354	0.0979664	0.0968165	0.0860613	0.0944853	0.0753744	0.0104066	0.0710842	0.097883	0.0938423	0.0844374								0	0	0	0	0	0	0	0	0	0	0	0	0	0	0	0	0	0
Phenylalanine	0.018689	0.0159036	0.0233328	0.0238883	0.0241218	0.023055	0.0206161	0.0222123	0.0177914	0.0266523	0.0167572	0.00258644	0.016053	0.0190708	0.0222699	0.0239749								0.000267124	1.96748e-05	0	0	0	0	0	0	0	0	0	0	0	0	0	0	0	0
Phenylalanine	0.0868382	0.0808948	0.0777238	0.0787041	0.0847457	0.0902209	0.0671795	0.0703634	0.0736572	0.0683834	0.0729586	0.0142026	0.0645104	0.0591323	0.0723911	0.059361								0.000647349	0.000842359	0	0	0	0	0	0	0	0	0	0	0	0	0	0	0	0
Phenylalanine	0.0294357	0.0276198	0.0328444	0.0265172	0.0302048	0.03099	0.0407497	0.0351917	0.0374548	0.0293783	0.0284608	0.00415512	0.0295862	0.0334215	0.0348004	0.0341665								0.000391597	0.000426155	0	0	0	0	0	0	0	0	0	0	0	0	0	0	0	0
Phenylalanine	0.0407802	0.0369929	0.0290898	0.0372051	0.0314081	0.0321251	0.0333952	0.0329026	0.0292788	0.0352715	0.0382162	0.00529368	0.036157	0.0367138	0.0351041	0.0347413								0.00103131	0.00101624	0	0	0	0	0	0	0	0	0	0	0	0	0	0	0	0
Phenylalanine	0.0628416	0.0913155	0.0766144	0.0740625	0.0751707	0.0654225	0.0668388	0.0740311	0.0847813	0.0633307	0.0787768	0.018414	0.0669144	0.0645302	0.0574422	0.0744484								0.0017352	0.00165025	0	0	0	0	0	0	0	0	0	0	0	0	0	0	0	0
Phenylalanine 218	0.486601	0.605202	0.523502	0.591441	0.47152	0.384095	0.435708	0.453696	0.500648	0.425639	0.707362	0.991909	0.724693	0.42334	0.387017	0.574293								0.626681	0.574157	0	0	0	0	0	0	0	0	0	0	0	0	0	0	0	0
Phenylalanine 218	0.27704	0.24301	0.250451	0.235552	0.295208	0.357074	0.292261	0.288695	0.279237	0.27565	0.160301	0.00702157	0.140672	0.238882	0.262656	0.228255								0.342809	0.391578	0	0	0	0	0	0	0	0	0	0	0	0	0	0	0	0
Phenylalanine 218	0.236359	0.151788	0.226046	0.173006	0.233272	0.258831	0.272031	0.257609	0.220114	0.298712	0.132337	0.00106969	0.134635	0.337778	0.350327	0.197452								0.0305099	0.0342658	0	0	0	0	0	0	0	0	0	0	0	0	0	0	0	0
Xylose
Xylose
Xylose
Xylose
Arabinose
Arabinose
Arabinose
Arabinose
Asparagine	0.376937	0.300534	0.327408	0.26334	0.126429	0.169678	0.171117	0.191895	0.223122	0.189795	0.269747	0.860198	0.300485	0.353775	0.314326	0.352301								0.922182	0.858284	0	0	0	0	0	0	0	0	0	0	0	0	0	0	0	0
Asparagine	0.14688	0.135674	0.191519	0.252359	0.27295	0.296111	0.287	0.298718	0.265668	0.276	0.226419	0.0462886	0.228403	0.229825	0.223699	0.168524								0.0344618	0.0337177	0	0	0	0	0	0	0	0	0	0	0	0	0	0	0	0
Asparagine	0.283681	0.352192	0.274154	0.221646	0.116687	0.144195	0.148746	0.149604	0.175218	0.185227	0.236198	0.0469883	0.221905	0.191524	0.206746	0.271224								0.00337	2.70199e-18	0	0	0	0	0	0	0	0	0	0	0	0	0	0	0	0
Asparagine	0.192502	0.2116	0.206919	0.262655	0.483933	0.390016	0.393138	0.359783	0.335992	0.348978	0.267636	0.0465255	0.249208	0.224876	0.255228	0.207951								0.0399862	0.107998	0	0	0	0	0	0	0	0	0	0	0	0	0	0	0	0
Ribose	0.347156	0.346475	0.354658	0.489224	0.569772	0.518466	0.324184	0.355608	0.291122	0.273051	0.28162	0.401681	0.366394	0.274281	0.358839	0.373009								0.47593	0.601164	0	0	0	0	0	0	0	0	0	0	0	0	0	0	0	0
Ribose	0.146679	0.266738	0.0926835	0	0.0300538	0.0074026	0.108014	0.106321	0.276486	0.177316	0.379372	0.340544	0.273017	0.146576	0.274528	0.245112								0.316416	0.250444	0	0	0	0	0	0	0	0	0	0	0	0	0	0	0	0
Ribose	0.0671651	0.137145	0.276484	0.139051	0.214743	0.167797	0.109844	0.231867	0.180433	0.146924	0.124769	0.0805895	0.0177102	0.255366	0.10339	0.236805								0.0429063	0.0522425	0	0	0	0	0	0	0	0	0	0	0	0	0	0	0	0
Ribose	0.439	0.249642	0.276175	0.371725	0.185431	0.306334	0.457958	0.306204	0.25196	0.402708	0.214239	0.177186	0.342879	0.323778	0.263243	0.145073								0.164748	0.0961497	0	0	0	0	0	0	0	0	0	0	0	0	0	0	0	0
Rhamnose
Rhamnose
Rhamnose
bGlycerophosphate
bGlycerophosphate
bGlycerophosphate
bGlycerophosphate
Fucose
Fucose
Fucose
Quinolinate
Quinolinate
Quinolinate
Quinolinate
Quinolinate
Quinolinate
Quinolinate
Quinolinate
DHAP
DHAP
DHAP
DHAP
Putrescine
Putrescine
Putrescine
cis-Aconitate	1	0.983101	0.986671	0.992527	1	1	1	1	1	1	1	0.904719	1	1	1	1								0.818198	0.809557	0	0	0	0	0	0	0	0	0	0	0	0	0	0	0	0
cis-Aconitate	1.0975e-19	1.54191e-18	1.46235e-18	1.32853e-18	1.44728e-19	1.02508e-19	4.53898e-20	6.47579e-20	1.06592e-19	9.25144e-20	9.34078e-20	0	1.26e-19	9.16749e-20	6.1396e-20	7.80109e-20								0.0776329	0.0719004	0	0	0	0	0	0	0	0	0	0	0	0	0	0	0	0
cis-Aconitate	0	0	0	0	0	0	0	0	0	0	0	0	0	0	0	0								0.0196407	0.0189017	0	0	0	0	0	0	0	0	0	0	0	0	0	0	0	0
cis-Aconitate	2.01606e-18	0	0	0	2.65857e-18	1.88302e-18	8.33787e-19	1.18957e-18	1.95805e-18	1.69944e-18	1.71585e-18	0.00769155	2.31455e-18	1.68402e-18	1.12781e-18	1.43302e-18								0.0268809	0.0290442	0	0	0	0	0	0	0	0	0	0	0	0	0	0	0	0
cis-Aconitate	7.45313e-17	0.016899	0.0133293	0.00747316	5.3142e-17	0	0	0	0	0	0	0.0366986	0	0	0	0								0.0376901	0.0362896	0	0	0	0	0	0	0	0	0	0	0	0	0	0	0	0
cis-Aconitate	3.92236e-18	0	0	0	5.17241e-18	3.66353e-18	1.62218e-18	2.31438e-18	3.8095e-18	3.30637e-18	3.3383e-18	0.0508911	4.5031e-18	3.27637e-18	2.19423e-18	2.78803e-18								0.00766043	0.0124784	0	0	0	0	0	0	0	0	0	0	0	0	0	0	0	0
cis-Aconitate	0	0	0	0	0	0	0	0	0	0	0	0	6.93889e-18	0	0	0								0.0122971	0.0218287	0	0	0	0	0	0	0	0	0	0	0	0	0	0	0	0
aGP
aGP
aGP
aGP
aGP 357
aGP 357
aGP 357
Glutamine	0.509502	0.347418	0.449044	0.492547	0.512193	0.625694	0.528931	0.497038	0.402084	0.371922	0.265407	0.184318	0.310362	0.384924	0.436264	0.326198								0.559888	0.417193	0	0	0	0	0	0	0	0	0	0	0	0	0	0	0	0
Glutamine	0.127937	0.170391	0.131076	0.173073	0.0164449	0	0.0908501	0.112338	0.0349304	0.225311	0.235175	0.25716	0.107957	0.116288	0.0339969	0.201022								0.376142	0.485372	0	0	0	0	0	0	0	0	0	0	0	0	0	0	0	0
Glutamine	2.73619e-20	0.0253834	0.0301377	0	0.169321	8.18966e-21	0.00674474	0.00731192	0.0713492	0	0.0117891	0.00997553	1.07044e-20	0.00526854	0	0								0.0563811	0.0867262	0	0	0	0	0	0	0	0	0	0	0	0	0	0	0	0
Glutamine	0.0273864	0	0	0	0.0188164	2.00211e-19	0	0.00586657	0	0	7.66322e-20	0.0618669	2.57037e-19	4.84497e-20	0	0								0.0040792	0.00536799	0	0	0	0	0	0	0	0	0	0	0	0	0	0	0	0
Glutamine	0.00808154	4.96313e-19	3.61497e-19	2.78797e-18	0.0115172	0	1.75914e-19	3.26769e-20	0	0.00357181	0.0261528	0.167514	0.0574107	0.053861	6.86325e-19	0.0235484								0.00310078	0.00386875	0	0	0	0	0	0	0	0	0	0	0	0	0	0	0	0
Glutamine	0.327093	0.456807	0.389743	0.33438	0.271708	0.374306	0.373474	0.377445	0.491637	0.399194	0.461476	0.319164	0.52427	0.439659	0.529739	0.449231								0.000408808	0.00147169	0	0	0	0	0	0	0	0	0	0	0	0	0	0	0	0
Glutamine 156	0.480396	0.43011	0.453709	0.459695	0.431213	0.46927	0.482293	0.477283	0.417348	0.486506	0.40903	0.376602	0.415735	0.467757	0.494556	0.41419								0.918313	0.890897	0	0	0	0	0	0	0	0	0	0	0	0	0	0	0	0
Glutamine 156	0.144262	0.133535	0.157506	0.15405	0.176081	0.156961	0.164343	0.162452	0.137125	0.117136	0.118397	0.161294	0.121226	0.115664	0.107846	0.10888								0.0314977	0.0377659	0	0	0	0	0	0	0	0	0	0	0	0	0	0	0	0
Glutamine 156	0.0755324	0.0760577	0.0832424	0.0660626	0.0904367	0.0774441	0.0751931	0.0677448	0.0753415	0.0770492	0.0795847	0.102611	0.0746698	0.070022	0.0624501	0.0660491								0.0129252	0.019487	0	0	0	0	0	0	0	0	0	0	0	0	0	0	0	0
Glutamine 156	0.0946949	0.0808608	0.0729045	0.0784886	0.0866447	0.084151	0.0644109	0.0773783	0.0722528	0.0738758	0.0662586	0.0714142	0.0703399	0.0909037	0.0901882	0.137219								0.0175079	0.0292932	0	0	0	0	0	0	0	0	0	0	0	0	0	0	0	0
Glutamine 156	0.205115	0.279437	0.232638	0.241704	0.215625	0.212174	0.213759	0.215142	0.297933	0.245433	0.32673	0.288079	0.31803	0.255654	0.24496	0.273662								0.0197558	0.0225567	0	0	0	0	0	0	0	0	0	0	0	0	0	0	0	0
3PGA	0.332723	0.299413	0.283966	0.284694	0.234336	0.263359	0.218486	0.230464	0.250011	0.294565	0.283283	0.272554	0.364371	0.438465	0.442196	0.402337								0.877086	0.848963	0	0	0	0	0	0	0	0	0	0	0	0	0	0	0	0
3PGA	0	0	0	0	0	0	0	0	0	0	0	0	0	0	0.00198952	0								0.00777579	0.0135266	0	0	0	0	0	0	0	0	0	0	0	0	0	0	0	0
3PGA	0.627445	0.695431	0.676715	0.6776	0.717206	0.69368	0.769445	0.766288	0.661807	0.667414	0.629123	0.633007	0.597666	0.514448	0.512907	0.535009								0.104173	0.126937	0	0	0	0	0	0	0	0	0	0	0	0	0	0	0	0
3PGA	0.0398323	0.00515592	0.0393195	0.0377064	0.0484575	0.0429604	0.0120693	0.00324805	0.088182	0.0380218	0.0875937	0.0944392	0.0379632	0.0470879	0.042908	0.0626548								0.0109648	0.0105738	0	0	0	0	0	0	0	0	0	0	0	0	0	0	0	0
3PGA 357
3PGA 357
3PGA 357
Citrate	0.973613	0.973947	0.976612	0.97607	0.982886	0.98221	0.977902	0.971766	0.963051	0.978287	0.979123	0.971179	0.977654	0.979196	0.963549	0.983445								0.988409	0.990351	0	0	0	0	0	0	0	0	0	0	0	0	0	0	0	0
Citrate	0.00571313	0.00472459	0.00158199	0.00320216	0.000653679	0	0	0.00604737	0.00801573	0.00281155	0	0.00453107	0.000239623	0	0.00967408	0								0	0	0	0	0	0	0	0	0	0	0	0	0	0	0	0	0	0
Citrate	0.0137371	0.0152796	0.018608	0.0168514	0.0132194	0.0113574	0.0190899	0.0154629	0.0232649	0.0146907	0.0160661	0.0199289	0.0165113	0.0173626	0.020516	0.0123054								0.00963405	0.00776107	0	0	0	0	0	0	0	0	0	0	0	0	0	0	0	0
Citrate	0.00245513	0.00222592	4.98406e-05	1.33325e-19	7.56739e-20	0.00344338	0.000767484	0.00363184	0.00190856	0.00041557	0.00184228	0.000980201	0.00244267	0	0.00395379	0.00215111								0.000212411	8.27497e-05	0	0	0	0	0	0	0	0	0	0	0	0	0	0	0	0
Citrate	0.00344492	0.0026534	0.00203669	0.00272051	0.0023654	0.00291552	0.00113608	0.002552	0.00249512	0.0024113	0.0020465	0.00239647	0.00243888	0.0031762	0.00201993	0.00203262								0.00151947	0.00166305	0	0	0	0	0	0	0	0	0	0	0	0	0	0	0	0
Citrate	0.000406276	0.000631404	0.00105757	0.00106573	0.000486146	4.04564e-05	0.00110427	0.000196917	0.000964095	0.00109134	0.000673755	0.000631997	0.000327909	0.000265047	0	6.55162e-05								0.000224829	0.000142287	0	0	0	0	0	0	0	0	0	0	0	0	0	0	0	0
Citrate	0.0006305	0.000538428	5.35118e-05	9.02812e-05	0.000389494	3.31812e-05	2.9612e-19	0.000343078	0.000301058	0.00029214	0.000248636	0.000352712	0.000385229	5.38054e-19	0.000287401	3.28031e-19								5.0482e-19	3.15218e-19	0	0	0	0	0	0	0	0	0	0	0	0	0	0	0	0
Ornithine	0.670572	0.855198	0.803468	0.833438	0.906569	0.920927	0.87058	0.884364	0.891389	0.81594	0.850035	0.935999	0.77037	0.679191	0.657275	0.729116								1	1	0	0	0	0	0	0	0	0	0	0	0	0	0	0	0	0
Ornithine	0.329428	0.144802	0.196532	0.166562	0.0934312	0.0790725	0.12942	0.115636	0.108611	0.18406	0.149965	0.0640005	0.22963	0.320809	0.342725	0.270884								2.22045e-16	2.22045e-16	0	0	0	0	0	0	0	0	0	0	0	0	0	0	0	0
Methyl-citrate	0.908489	0.705903	0.769987	0.846654	0.828647	0.977559	0.75419	1	0.760399	0.937173	0.653288	0.416197	0.812042	0.956656	1	0.730558								0.137994	0.0998195	0	0	0	0	0	0	0	0	0	0	0	0	0	0	0	0
Methyl-citrate	0	0	0	0.0632347	0	5.32857e-19	9.00665e-19	0	0	3.4521e-20	0.025466	0.0860697	0.0333819	0	0	0								0.222894	0.193539	0	0	0	0	0	0	0	0	0	0	0	0	0	0	0	0
Methyl-citrate	0	0	1.43948e-20	0	0	1.6385e-19	0	2.29096e-19	1.7391e-20	0	0	0.0772542	0	2.24507e-19	0	0.0210855								0.0248083	0.01667	0	0	0	0	0	0	0	0	0	0	0	0	0	0	0	0
Methyl-citrate	0	0.0861623	0.137984	0.00817727	0.088084	0	7.29775e-19	4.09425e-19	0.0381562	0.00730539	0.164664	0.240066	0.0156078	0	3.85714e-18	0.11056								0.151885	0.129972	0	0	0	0	0	0	0	0	0	0	0	0	0	0	0	0
Methyl-citrate	0.0766875	0.0253807	0.0319994	0.0573573	0.044871	0.0178201	3.87995e-19	3.01151e-18	0.0882815	0.00355013	0.0993775	0.0863345	0.120644	0.0433435	1.18402e-17	0.137797								0	1.25186e-19	0	0	0	0	0	0	0	0	0	0	0	0	0	0	0	0
Methyl-citrate	0.0148237	0.127907	4.65778e-20	0.0245766	0	3.95499e-19	0	0	4.89391e-20	0.0519713	0.057204	0.0796086	0.0183243	0	1.43188e-18	0								0.456688	0.551116	0	0	0	0	0	0	0	0	0	0	0	0	0	0	0	0
Methyl-citrate	0	0.0546468	0.00842445	0	2.84612e-21	1.67162e-19	0	0	0.113163	0	0	0.0144706	0	4.84119e-19	2.19252e-19	0								0.00573066	0.00888304	0	0	0	0	0	0	0	0	0	0	0	0	0	0	0	0
Methyl-citrate	0	1.09356e-19	0.051606	0	0.0383977	0.004621	0.24581	0	0	1.52711e-19	0	0	0	8.73536e-19	0	1.91111e-19								0	4.92184e-21	0	0	0	0	0	0	0	0	0	0	0	0	0	0	0	0
Lysine (1)	0.584168	0.877135	0.715868	0.761923	0.781732	0.686198	0.560993	0.618338	0.788287	0.766035	0.890545	0.928667	0.850814	0.499549	0.489296	0.726128								0.782761	0.749034	0	0	0	0	0	0	0	0	0	0	0	0	0	0	0	0
Lysine (1)	0.0897028	0.0434083	0.0714865	0.060248	0.0541603	0.061883	0.0831716	0.0735653	0.062177	0.052298	0.0392283	0.0349744	0.0484073	0.101452	0.0975646	0.0643145								0.149988	0.176504	0	0	0	0	0	0	0	0	0	0	0	0	0	0	0	0
Lysine (1)	0.0341198	0.0325204	0.0374677	0.0331662	0.0276828	0.0352937	0.0374482	0.0296073	0.0301357	0.0317802	0.0313277	0.0321105	0.03208	0.0419413	0.0487239	0.0336853								0.0654665	0.0733723	0	0	0	0	0	0	0	0	0	0	0	0	0	0	0	0
Lysine (1)	0.183962	0.0285867	0.109241	0.091371	0.0851055	0.130291	0.19271	0.169793	0.0731271	0.0914311	0.0241552	0.00304815	0.043079	0.20344	0.199516	0.105583								7.62194e-20	7.08578e-20	0	0	0	0	0	0	0	0	0	0	0	0	0	0	0	0
Lysine (1)	0.027679	0.00508854	0.0167676	0.0140012	0.0135193	0.0244915	0.0268064	0.0288672	0.0110253	0.013449	0.00439331	0.000207627	0.00635657	0.040638	0.0477848	0.0181141								1.00942e-20	0	0	0	0	0	0	0	0	0	0	0	0	0	0	0	0	0
Lysine (1)	0.0803681	0.0132611	0.0491695	0.0392907	0.0378002	0.0618421	0.0988709	0.0798296	0.0352479	0.0450071	0.0103506	0.000992486	0.019263	0.11298	0.117114	0.0521748								0.00178441	0.00109031	0	0	0	0	0	0	0	0	0	0	0	0	0	0	0	0
Fructose	0.997179	1	1	1	1	1	1	1	1	1	0.997439	0.988866	1	1	1	1								0.99744	0.998724	0	0	0	0	0	0	0	0	0	0	0	0	0	0	0	0
Fructose	0.00282111	9.47593e-17	7.80626e-18	0	2.94903e-17	0	0	0	0	0	0.00122055	6.10847e-05	1.12757e-17	0	0	0								0.00255988	0.00127566	0	0	0	0	0	0	0	0	0	0	0	0	0	0	0	0
Fructose	0	0	0	0	0	0	0	0	0	0	0	0.00631466	0	0	0	0								0	0	0	0	0	0	0	0	0	0	0	0	0	0	0	0	0	0
Fructose	0	0	0	0	0	0	0	0	0	0	0.0013409	0.00475792	0	0	1.55868e-17	0								0	0	0	0	0	0	0	0	0	0	0	0	0	0	0	0	0	0
Mannose
Mannose
Mannose
Mannose
Mannose
Galactose
Galactose
Galactose
Galactose
Galactose
Glucose	0.906109	0.919822	0.929341	0.935232	0.955976	0.939085	0.941466	0.968338	0.837661	0.889379	0.859273	0.842128	0.890673	0.906574	0.921318	0.902729								0.982912	0.9844	0	0	0	0	0	0	0	0	0	0	0	0	0	0	0	0
Glucose	0.0098848	0.00917908	0.00889499	0.00776798	0.00812084	0.01224	0.0107698	0.00627898	0.0120539	0.00856227	0.00770199	0.0159171	0.010506	0.012246	0.00642453	0.0141633								0.0133018	0.0125588	0	0	0	0	0	0	0	0	0	0	0	0	0	0	0	0
Glucose	0	0.00127166	0	0	0	7.81855e-05	0	0	0	0	0	0.00146035	5.88871e-05	0.0023738	0	0								0.00303533	0.00211721	0	0	0	0	0	0	0	0	0	0	0	0	0	0	0	0
Glucose	0.00323281	0.00318178	0.00136315	0.00171494	0.00216231	0.00212257	0.00323239	0.0017306	0	0	0.00011784	0.00613767	0.00126091	0.0027105	0.00141908	0.00273705								0	0	0	0	0	0	0	0	0	0	0	0	0	0	0	0	0	0
Glucose	0.0807734	0.066545	0.0604009	0.0552853	0.033741	0.0464746	0.044532	0.0236521	0.150286	0.102059	0.132908	0.134357	0.0975013	0.0760953	0.0708388	0.080371								0.000750424	0.000924177	0	0	0	0	0	0	0	0	0	0	0	0	0	0	0	0
Erythrose4P	0.381652	0.387961	0.397397	0.505308	0.535805	0.491314	0.463896	0.611702	0.517175	0.543686	0.537906	0.538271	0.480584	0.509868	0.483973	0.520417								0.773292	0.818092	0	0	0	0	0	0	0	0	0	0	0	0	0	0	0	0
Erythrose4P	0.0423912	0.0731315	0.0391945	0.0733314	0.0418837	0.0586641	0.0923292	0.0508299	0.0150122	0.0117118	0.0135437	0.0224435	0	1.11046e-19	8.92752e-20	0								0.0917668	0.105621	0	0	0	0	0	0	0	0	0	0	0	0	0	0	0	0
Erythrose4P	0.575957	0.538908	0.563408	0.421361	0.422311	0.450022	0.443775	0.337468	0.467813	0.444602	0.44855	0.439285	0.519416	0.490132	0.516027	0.479583								0.134942	0.0762865	0	0	0	0	0	0	0	0	0	0	0	0	0	0	0	0
Histidine	0.0161298	0.0279816	0.013434	0.0169315	0.000190199	0.0288621	0.0247716	0.0233019	0.0766744	0.0459984	0.103539	0.156761	0.0640775	0.0683117	0.0949227	0.0861131								0.13571	0.122208	0	0	0	0	0	0	0	0	0	0	0	0	0	0	0	0
Histidine	0.386501	0.365434	0.380986	0.413671	0.521925	0.344946	0.26038	0.343162	0.326768	0.399984	0.295947	0.22035	0.330296	0.343256	0.302837	0.349985								0.458279	0.45708	0	0	0	0	0	0	0	0	0	0	0	0	0	0	0	0
Histidine	0.0725487	0.0824868	0.084214	0.0628371	0.0259771	0.0956891	0.130809	0.0908096	0.0990268	0.0562006	0.105025	0.119507	0.0997179	0.0731996	0.079484	0.0528401								0.0284804	0.0283879	0	0	0	0	0	0	0	0	0	0	0	0	0	0	0	0
Histidine	0.101851	0.129224	0.105434	0.0955201	0.10188	0.106377	0.0945573	0.111035	0.149819	0.123784	0.161274	0.239755	0.144756	0.136924	0.125727	0.131502								0.0725891	0.0740598	0	0	0	0	0	0	0	0	0	0	0	0	0	0	0	0
Histidine	0.0543629	0.0571139	0.0489726	0.0353542	0	0.0464027	0.0891061	0.0539565	0.0858036	0.0595993	0.092964	0.086183	0.0944239	0.120861	0.109523	0.0905962								0.0585899	0.0671119	0	0	0	0	0	0	0	0	0	0	0	0	0	0	0	0
Histidine	0.368606	0.337759	0.366959	0.375686	0.350027	0.377723	0.400376	0.377736	0.261909	0.314433	0.241251	0.177444	0.266728	0.257448	0.287507	0.288964								0.246352	0.251152	0	0	0	0	0	0	0	0	0	0	0	0	0	0	0	0
Lysine (2)	0	0	0	0	0	0	0	0	0	0	0	0	0	0	0	0								0	0	0	0	0	0	0	0	0	0	0	0	0	0	0	0	0	0
Lysine (2)	0	0	0	0	0	0	0	0	0	0	0	0	0	0	0	0								0	0	0	0	0	0	0	0	0	0	0	0	0	0	0	0	0	0
Lysine (2)	0	0	0	0	0	0	0	0	0	0	0	0	0	0	0	0								0	0	0	0	0	0	0	0	0	0	0	0	0	0	0	0	0	0
Lysine (2)	0	0	0	0	0	0	0	0	0	0	0	0	0	0	0	0								0	0	0	0	0	0	0	0	0	0	0	0	0	0	0	0	0	0
Lysine (2)	0	0	0	0	0	0	0	0	0	0	0	0	0	0	0	0								0	0	0	0	0	0	0	0	0	0	0	0	0	0	0	0	0	0
Lysine (2)	0	0	0	0	0	0	0	0	0	0	0	0	0	0	0	0								0	0	0	0	0	0	0	0	0	0	0	0	0	0	0	0	0	0
Sorbitol	0	0	0	0	0	0	0	0	0	0	0	0	0	0	0	0								0	0	0	0	0	0	0	0	0	0	0	0	0	0	0	0	0	0
Sorbitol	0	0	0	0	0	0	0	0	0	0	0	0	0	0	0	0								0	0	0	0	0	0	0	0	0	0	0	0	0	0	0	0	0	0
Sorbitol	0	0	0	0	0	0	0	0	0	0	0	0	0	0	0	0								0	0	0	0	0	0	0	0	0	0	0	0	0	0	0	0	0	0
Sorbitol	0	0	0	0	0	0	0	0	0	0	0	0	0	0	0	0								0	0	0	0	0	0	0	0	0	0	0	0	0	0	0	0	0	0
Sorbitol	0	0	0	0	0	0	0	0	0	0	0	0	0	0	0	0								0	0	0	0	0	0	0	0	0	0	0	0	0	0	0	0	0	0
Glucosamine	0	0	0	0	0	0	0	0	0	0	0	0	0	0	0	0								0	0	0	0	0	0	0	0	0	0	0	0	0	0	0	0	0	0
Glucosamine	0	0	0	0	0	0	0	0	0	0	0	0	0	0	0	0								0	0	0	0	0	0	0	0	0	0	0	0	0	0	0	0	0	0
Glucosamine	0	0	0	0	0	0	0	0	0	0	0	0	0	0	0	0								0	0	0	0	0	0	0	0	0	0	0	0	0	0	0	0	0	0
Glucosamine	0	0	0	0	0	0	0	0	0	0	0	0	0	0	0	0								0	0	0	0	0	0	0	0	0	0	0	0	0	0	0	0	0	0
Tyrosine	0	0	0	0	0	0	0	0	0	0	0	0	0	0	0	0								0	0	0	0	0	0	0	0	0	0	0	0	0	0	0	0	0	0
Tyrosine	0	0	0	0	0	0	0	0	0	0	0	0	0	0	0	0								0	0	0	0	0	0	0	0	0	0	0	0	0	0	0	0	0	0
Tyrosine	0	0	0	0	0	0	0	0	0	0	0	0	0	0	0	0								0	0	0	0	0	0	0	0	0	0	0	0	0	0	0	0	0	0
Tyrosine	0	0	0	0	0	0	0	0	0	0	0	0	0	0	0	0								0	0	0	0	0	0	0	0	0	0	0	0	0	0	0	0	0	0
Tyrosine	0	0	0	0	0	0	0	0	0	0	0	0	0	0	0	0								0	0	0	0	0	0	0	0	0	0	0	0	0	0	0	0	0	0
Tyrosine	0	0	0	0	0	0	0	0	0	0	0	0	0	0	0	0								0	0	0	0	0	0	0	0	0	0	0	0	0	0	0	0	0	0
Tyrosine	0	0	0	0	0	0	0	0	0	0	0	0	0	0	0	0								0	0	0	0	0	0	0	0	0	0	0	0	0	0	0	0	0	0
Tyrosine	0	0	0	0	0	0	0	0	0	0	0	0	0	0	0	0								0	0	0	0	0	0	0	0	0	0	0	0	0	0	0	0	0	0
Tyrosine	0	0	0	0	0	0	0	0	0	0	0	0	0	0	0	0								0	0	0	0	0	0	0	0	0	0	0	0	0	0	0	0	0	0
Tyrosine 218	0	0	0	0	0	0	0	0	0	0	0	0	0	0	0	0								0	0	0	0	0	0	0	0	0	0	0	0	0	0	0	0	0	0
Tyrosine 218	0	0	0	0	0	0	0	0	0	0	0	0	0	0	0	0								0	0	0	0	0	0	0	0	0	0	0	0	0	0	0	0	0	0
Tyrosine 218	0	0	0	0	0	0	0	0	0	0	0	0	0	0	0	0								0	0	0	0	0	0	0	0	0	0	0	0	0	0	0	0	0	0
Pantothenate	0	0	0	0	0	0	0	0	0	0	0	0	0	0	0	0								0	0	0	0	0	0	0	0	0	0	0	0	0	0	0	0	0	0
Pantothenate	0	0	0	0	0	0	0	0	0	0	0	0	0	0	0	0								0	0	0	0	0	0	0	0	0	0	0	0	0	0	0	0	0	0
Pantothenate	0	0	0	0	0	0	0	0	0	0	0	0	0	0	0	0								0	0	0	0	0	0	0	0	0	0	0	0	0	0	0	0	0	0
Pantothenate	0	0	0	0	0	0	0	0	0	0	0	0	0	0	0	0								0	0	0	0	0	0	0	0	0	0	0	0	0	0	0	0	0	0
Pantothenate	0	0	0	0	0	0	0	0	0	0	0	0	0	0	0	0								0	0	0	0	0	0	0	0	0	0	0	0	0	0	0	0	0	0
Pantothenate	0	0	0	0	0	0	0	0	0	0	0	0	0	0	0	0								0	0	0	0	0	0	0	0	0	0	0	0	0	0	0	0	0	0
Deoxyribose5P	0	0	0	0	0	0	0	0	0	0	0	0	0	0	0	0								0	0	0	0	0	0	0	0	0	0	0	0	0	0	0	0	0	0
Deoxyribose5P	0	0	0	0	0	0	0	0	0	0	0	0	0	0	0	0								0	0	0	0	0	0	0	0	0	0	0	0	0	0	0	0	0	0
Deoxyribose5P	0	0	0	0	0	0	0	0	0	0	0	0	0	0	0	0								0	0	0	0	0	0	0	0	0	0	0	0	0	0	0	0	0	0
scyllo-Ins	0	0	0	0	0	0	0	0	0	0	0	0	0	0	0	0								0	0	0	0	0	0	0	0	0	0	0	0	0	0	0	0	0	0
scyllo-Ins	0	0	0	0	0	0	0	0	0	0	0	0	0	0	0	0								0	0	0	0	0	0	0	0	0	0	0	0	0	0	0	0	0	0
scyllo-Ins	0	0	0	0	0	0	0	0	0	0	0	0	0	0	0	0								0	0	0	0	0	0	0	0	0	0	0	0	0	0	0	0	0	0
scyllo-Ins	0	0	0	0	0	0	0	0	0	0	0	0	0	0	0	0								0	0	0	0	0	0	0	0	0	0	0	0	0	0	0	0	0	0
scyllo-Ins	0	0	0	0	0	0	0	0	0	0	0	0	0	0	0	0								0	0	0	0	0	0	0	0	0	0	0	0	0	0	0	0	0	0
mIns	0	0	0	0	0	0	0	0	0	0	0	0	0	0	0	0								0	0	0	0	0	0	0	0	0	0	0	0	0	0	0	0	0	0
mIns	0	0	0	0	0	0	0	0	0	0	0	0	0	0	0	0								0	0	0	0	0	0	0	0	0	0	0	0	0	0	0	0	0	0
mIns	0	0	0	0	0	0	0	0	0	0	0	0	0	0	0	0								0	0	0	0	0	0	0	0	0	0	0	0	0	0	0	0	0	0
mIns	0	0	0	0	0	0	0	0	0	0	0	0	0	0	0	0								0	0	0	0	0	0	0	0	0	0	0	0	0	0	0	0	0	0
mIns	0	0	0	0	0	0	0	0	0	0	0	0	0	0	0	0								0	0	0	0	0	0	0	0	0	0	0	0	0	0	0	0	0	0
Ru5P	0	0	0	0	0	0	0	0	0	0	0	0	0	0	0	0								0	0	0	0	0	0	0	0	0	0	0	0	0	0	0	0	0	0
Ru5P	0	0	0	0	0	0	0	0	0	0	0	0	0	0	0	0								0	0	0	0	0	0	0	0	0	0	0	0	0	0	0	0	0	0
Ru5P	0	0	0	0	0	0	0	0	0	0	0	0	0	0	0	0								0	0	0	0	0	0	0	0	0	0	0	0	0	0	0	0	0	0
R5P	0	0	0	0	0	0	0	0	0	0	0	0	0	0	0	0								0	0	0	0	0	0	0	0	0	0	0	0	0	0	0	0	0	0
R5P	0	0	0	0	0	0	0	0	0	0	0	0	0	0	0	0								0	0	0	0	0	0	0	0	0	0	0	0	0	0	0	0	0	0
R5P	0	0	0	0	0	0	0	0	0	0	0	0	0	0	0	0								0	0	0	0	0	0	0	0	0	0	0	0	0	0	0	0	0	0
R5P	0	0	0	0	0	0	0	0	0	0	0	0	0	0	0	0								0	0	0	0	0	0	0	0	0	0	0	0	0	0	0	0	0	0
Ru5P b	0	0	0	0	0	0	0	0	0	0	0	0	0	0	0	0								0	0	0	0	0	0	0	0	0	0	0	0	0	0	0	0	0	0
Ru5P b	0	0	0	0	0	0	0	0	0	0	0	0	0	0	0	0								0	0	0	0	0	0	0	0	0	0	0	0	0	0	0	0	0	0
Ru5P b	0	0	0	0	0	0	0	0	0	0	0	0	0	0	0	0								0	0	0	0	0	0	0	0	0	0	0	0	0	0	0	0	0	0
Tryptophan	0	0	0	0	0	0	0	0	0	0	0	0	0	0	0	0								0	0	0	0	0	0	0	0	0	0	0	0	0	0	0	0	0	0
Tryptophan	0	0	0	0	0	0	0	0	0	0	0	0	0	0	0	0								0	0	0	0	0	0	0	0	0	0	0	0	0	0	0	0	0	0
Tryptophan	0	0	0	0	0	0	0	0	0	0	0	0	0	0	0	0								0	0	0	0	0	0	0	0	0	0	0	0	0	0	0	0	0	0
Tryptophan	0	0	0	0	0	0	0	0	0	0	0	0	0	0	0	0								0	0	0	0	0	0	0	0	0	0	0	0	0	0	0	0	0	0
Tryptophan	0	0	0	0	0	0	0	0	0	0	0	0	0	0	0	0								0	0	0	0	0	0	0	0	0	0	0	0	0	0	0	0	0	0
Tryptophan	0	0	0	0	0	0	0	0	0	0	0	0	0	0	0	0								0	0	0	0	0	0	0	0	0	0	0	0	0	0	0	0	0	0
Tryptophan	0	0	0	0	0	0	0	0	0	0	0	0	0	0	0	0								0	0	0	0	0	0	0	0	0	0	0	0	0	0	0	0	0	0
Tryptophan	0	0	0	0	0	0	0	0	0	0	0	0	0	0	0	0								0	0	0	0	0	0	0	0	0	0	0	0	0	0	0	0	0	0
Tryptophan	0	0	0	0	0	0	0	0	0	0	0	0	0	0	0	0								0	0	0	0	0	0	0	0	0	0	0	0	0	0	0	0	0	0
Tryptophan	0	0	0	0	0	0	0	0	0	0	0	0	0	0	0	0								0	0	0	0	0	0	0	0	0	0	0	0	0	0	0	0	0	0
G6P	0.525843	0.561309	0.54157	0.586041	0.591312	0.612375	0.571611	0.566411	0.637885	0.566235	0.622316	0.747256	0.590671	0.513546	0.527331	0.614793								0.974824	0.980077	0	0	0	0	0	0	0	0	0	0	0	0	0	0	0	0
G6P	4.33681e-19	8.63836e-05	0.00149897	0	0.0133986	0.00557438	0	0	0.000129223	1.20734e-19	0.0205812	0	0.00136858	0	0.00477066	1.33254e-19								0.0216871	0.019923	0	0	0	0	0	0	0	0	0	0	0	0	0	0	0	0
G6P	0.474157	0.438605	0.456931	0.413959	0.395289	0.38205	0.428389	0.433589	0.361986	0.433765	0.357103	0.252744	0.40796	0.486454	0.467899	0.385207								0.00348939	1.79473e-19	0	0	0	0	0	0	0	0	0	0	0	0	0	0	0	0

## Sheet: Corrected Values
compound Name	#REF!	Isotope	RT	PG1	PG2	PG3	PG4	PG5	PG6	PG7	PG8	PG9	PG10	PG11	PG12	PG13	PG14	PG15	PG16	10ul Metabolite Mix	10ul Metabolite Mix	Hexane	Hexane	Hexane	Hexane	Hexane	Hexane	Hexane	Hexane	Hexane	Hexane	Hexane	Hexane	Hexane	Hexane	Hexane	Hexane
				PG1.CDF	PG2.CDF	PG3.CDF	PG4.CDF	PG5.CDF	PG6.CDF	PG7.CDF	PG8.CDF	PG9.CDF	PG10.CDF	PG11.CDF	PG12.CDF	PG13.CDF	PG14.CDF	PG15.CDF	PG16.CDF	10ul Metabolite Mix_1.CDF	10ul Metabolite Mix_2.CDF	Hexane_1.CDF	Hexane_10.CDF	Hexane_11.CDF	Hexane_12.CDF	Hexane_13.CDF	Hexane_14.CDF	Hexane_15.CDF	Hexane_16.CDF	Hexane_2.CDF	Hexane_3.CDF	Hexane_4.CDF	Hexane_5.CDF	Hexane_6.CDF	Hexane_7.CDF	Hexane_8.CDF	Hexane_9.CDF
Pyruvate	174	0	6.56667	329172	243263	286340	351034	241659	1.85694e+06	321632	624945	295668	230254	334605	581579	376099	258083	246343	329170	2.45513e+07	2.68618e+07	0	6.93896e-17	0	0	2019.71	1.28082e-16	0	0	0	0	1910.84	34.2224	18.5252	13.006	0	0
Pyruvate	174	1	6.56667	12006.3	11353.1	12630.1	15768	18096.9	19886.8	13845.6	16547.9	10829.9	10469.4	9204.94	10211.6	9519.89	8507.17	8142.95	10360.1	76210.5	83449.4	0	38.0107	120.444	0	1997.51	14.5459	0	0	0	0	1452.37	594.645	330.142	944.526	29.5448	81.4408
Pyruvate	174	2	6.56667	141730	162476	140250	117479	121058	54632.2	115448	92725.3	140614	153821	163886	122406	157694	182440	198277	198289	17491.9	20513.8	4.5094	56.508	316.298	32.7338	670.664	30.4925	0	10.2037	0	0	664.574	463.381	46.6788	782.571	78.0339	77.1178
Pyruvate	174	3	6.56667	25848.7	27396.6	29914	29462.3	33391.3	12233.9	30734.9	25343.2	31340.1	32863.3	26788.2	22450.8	24954.8	29385.8	26776	29354.5	706.245	552.085	1515.59	9353.24	9769.77	10116	6612.28	9100.94	8593.33	9614.83	7745.25	9206.52	6487.53	7968.4	11027.1	8752.86	9859.59	9527.62
Lactate	117	0	6.63462	2.3632e+07	2.16495e+07	2.13704e+07	2.48252e+07	3.65221e+07	2.32838e+07	2.06594e+07	2.28693e+07	1.2076e+07	1.21081e+07	1.16706e+07	1.28379e+07	1.16243e+07	1.03282e+07	9.83443e+06	1.29481e+07	1.01904e+08	9.47771e+07	2720.38	13276.1	11319.5	9897.56	27319.7	8438.28	5705.56	6927.5	3718.5	1646.4	21514.8	11604.9	10950.5	15928.3	13767	16765.5
Lactate	117	1	6.63462	13458	11867.9	10046.4	16032.2	39114.2	10293.4	11438.8	11856.4	7266.8	8659.93	4865.26	6790.43	5680.32	5180.86	4487.31	5522.94	976210	1.23257e+06	189.193	1206.61	1790.38	1341.5	1801.79	980.14	196.982	190.165	60.6159	232.784	1615.68	1566.8	1626.75	1436.39	1630.57	1315.02
Lactate	117	2	6.63462	18433.9	18141.2	16595.3	19472.5	30374.7	17101.1	15742.3	15424.6	21188.8	25477.3	18323.1	21192.1	16603.7	15470.6	15885.4	16849.7	158959	200940	7989.48	3907.25	4906.36	3975.08	8063.64	4356.74	3870.93	3300.4	4445.27	4030.43	6988.78	6205.87	6436.74	6351.43	4608.75	4321.17
Alanine	116	0	7.24138	7.78014e+07	7.74783e+07	7.63415e+07	7.4343e+07	7.91663e+07	6.71712e+07	6.58565e+07	6.96947e+07	7.63023e+07	8.18991e+07	7.87394e+07	7.20732e+07	7.44392e+07	7.12086e+07	7.46808e+07	8.38481e+07	6.62267e+07	7.04479e+07	0	0	0	0	0	0	0	0	0	0	0	0	0	0	0	0
Alanine	116	1	7.24138	95409.7	99214.2	110727	107767	130604	113158	99168.7	108837	117586	124572	119349	100856	106405	103871	110122	126124	194703	207677	0	0	0	0	0	0	0	0	0	0	0	0	0	0	0	0
Alanine	116	2	7.24138	30770.2	31199.3	31083.7	29444.2	33611.2	27431	25078.6	27993.4	31584.7	33766.1	33152.1	28970.7	30149.9	28348.3	32296.9	34635.8	27066.7	27944.4	0	0	0	0	0	0	0	0	0	0	0	0	0	0	0	0
Oxalate	190	0	7.61571	1523.78	1770.66	693.208	425.156	714.509	499.294	862.98	1367.26	525.499	609.482	675.737	1.15751e-11	8.19606e-12	694.13	7.26128e-12	942.813	8531.04	5870.34	0	0	0	0	0	0	0	0	0	0	0	0	0	0	0	0
Oxalate	190	1	7.61571	105957	126929	168012	179203	140180	218069	183297	182013	193223	149094	239435	335357	231470	184990	209320	194764	64016.8	131619	0	0	0	0	0	0	0	0	0	0	0	0	0	0	0	0
Valine	144	0	8.3519	3.10555e+06	5.29125e+06	3.43743e+06	3.27559e+06	3.94671e+06	2.20436e+06	2.12101e+06	2.10692e+06	2.69235e+06	2.24918e+06	4.29226e+06	1.27763e+07	3.8648e+06	2.08367e+06	2.02644e+06	3.59937e+06	5.5275e+07	4.68298e+07	0	0	0	0	0	0	0	0	0	0	0	0	0	0	0	0
Valine	144	1	8.3519	1667.07	1536.58	1806.17	1764.29	2033.79	1664.33	2208.04	1279.37	798.531	363.107	1558.03	1667.97	874.28	1408.18	995.183	597.06	5.15242e+06	6.56137e+06	0	0	0	0	0	0	0	0	0	0	0	0	0	0	0	0
Valine	144	2	8.3519	583.661	1129.12	854.49	878.804	1133.41	727.042	622.623	572.253	761.138	538.337	776.222	1851.31	981.226	661.974	409.136	947.78	438029	531942	0	0	0	0	0	0	0	0	0	0	0	0	0	0	0	0
Valine	144	3	8.3519	145043	165527	163116	147514	175585	173812	141088	159912	150442	132021	160302	252787	141069	133053	137806	149176	5.18533e+06	6.15484e+06	0	0	0	0	0	0	0	0	0	0	0	0	0	0	0	0
Valine	144	4	8.3519	4488.32	3850.29	5311.06	2583.16	1731.47	8289.2	7537.56	7666.15	3458.16	1639.85	4210.5	3753.55	4148.26	5243.74	5574.57	3842.79	47622.6	56490.5	0	0	0	0	0	0	0	0	0	0	0	0	0	0	0	0
Valine 218	218	0	8.3519	788272	1.28796e+06	883737	831244	974914	594096	567657	568318	683594	585853	1.06153e+06	3.01377e+06	968808	545705	537652	908773	5.39262e+07	5.46074e+07	0	0	0	0	0	0	0	0	0	0	0	0	0	0	0	0
Valine 218	218	1	8.3519	8634.89	12818.2	9353.79	9230.74	9592.85	7957.59	5823.3	6671.54	7993.74	5470.19	10334	26622.5	10230.2	6593.81	6293.27	8473.84	762450	997354	0	0	0	0	0	0	0	0	0	0	0	0	0	0	0	0
Valine 218	218	2	8.3519	0	0	388.161	0	0	202.565	370.068	354.55	0	0	358.36	0	0	362.803	308.062	0	7577.45	19366.1	0	0	0	0	0	0	0	0	0	0	0	0	0	0	0	0
Urea	189	0	8.74143	170530	195787	188979	174707	189720	196081	167185	179078	199072	178464	226050	277965	188849	179519	188072	211692	9.799e+07	9.86331e+07	0	0	0	0	0	0	0	0	0	0	0	0	0	0	0	0
Urea	189	1	8.74143	44179.5	47890	44704.5	42124.7	61296.5	43980.8	41179.3	40701.6	44219.2	42894.3	44709.4	55888.1	50274.5	47146.1	41562.1	49181.7	4.74379e-09	334218	0	0	0	0	0	0	0	0	0	0	0	0	0	0	0	0
Leucine	158	0	9.1181	1.27208e+06	2.35026e+06	1.41741e+06	1.41126e+06	1.72328e+06	769766	651155	704912	1.05821e+06	885992	1.96843e+06	7.13531e+06	1.72897e+06	698072	596468	1.26495e+06	5.63435e+07	5.26692e+07	0	0	0	0	0	0	0	0	0	0	0	0	0	0	0	0
Leucine	158	1	9.1181	2060.4	2468.85	2235.03	1632.59	3852.67	2525.1	2520.18	2739.43	2327.75	2328.85	2899.27	3751.91	2784.63	2277.54	2298.96	3376.69	9.48825e+06	1.22661e+07	0	0	0	0	0	0	0	0	0	0	0	0	0	0	0	0
Leucine	158	2	9.1181	2954.9	3018.33	3111.83	2889.61	2563.18	1907.77	3275.13	1843.55	3519.27	1947.05	2661.03	2193.85	1715.14	1973.82	2037.22	2274.42	566264	728094	0	0	0	0	0	0	0	0	0	0	0	0	0	0	0	0
Leucine	158	3	9.1181	268.583	212.859	305.51	374.643	328.014	517.442	458.507	482.638	476.612	454.946	336.492	195.938	267.417	422.729	526.831	424.059	0	0	0	0	0	0	0	0	0	0	0	0	0	0	0	0	0	0
Leucine	158	4	9.1181	103.219	81.4983	133.593	138.076	148.359	222.032	181.61	248.214	151.17	117.725	77.6323	38.5421	123.209	142.63	152.328	126.517	0	0	0	0	0	0	0	0	0	0	0	0	0	0	0	0	0	0
Leucine	158	5	9.1181	2540.9	1542.5	2394.01	2818.08	2914.02	4134.37	3912.76	3862.59	3765.71	4353.23	1714.29	775.749	1799.51	3686.74	3931.76	2970.48	3350.86	3884.13	0	0	0	0	0	0	0	0	0	0	0	0	0	0	0	0
Leucine 218	218	0	9.128	63932.8	134461	71723.8	77278.8	136575	37235.2	33103.6	38565.5	38934.9	31541.3	94730.9	683047	77426.6	22538.9	22450.3	47342.2	5.52677e+07	5.7934e+07	0	0	0	0	0	0	0	0	0	0	0	0	0	0	0	0
Leucine 218	218	1	9.128	634995	938521	721085	627832	468576	489901	424650	419390	785899	747731	961915	1.06928e+06	958227	630021	555675	923799	485044	745445	0	0	0	0	0	0	0	0	0	0	0	0	0	0	0	0
Leucine 218	218	2	9.128	8076.66	9588.59	7914.01	8484.34	7907.15	6879.22	7639.97	5975.14	11879	9014.73	10729.1	10353.3	10003.9	8171.78	7207.06	10443.9	20128.3	43246.3	0	0	0	0	0	0	0	0	0	0	0	0	0	0	0	0
Isoleucine	158	0	9.39524	11981.5	12567.3	11255.6	12715.4	17318.5	13214.1	12939	12084.5	12967.3	13079.5	13815.8	15006.7	14290.3	12379.8	11820.1	13311.3	4.80097e+07	4.50976e+07	0	0	0	0	0	0	0	0	0	0	0	0	0	0	0	0
Isoleucine	158	1	9.39524	4799.06	4638.74	4467.59	4117.89	4814.56	4832.84	5013.14	5380.09	5495.23	5230.18	5804.38	5171.06	5392.08	4513.42	4846.6	5222.22	5.2965e+06	7.49198e+06	0	0	0	0	0	0	0	0	0	0	0	0	0	0	0	0
Isoleucine	158	2	9.39524	3405.1	3348.44	4092.5	3741.08	3997.49	5002.3	3477.42	3576.69	3669.43	3488.13	3131.76	4964.82	3335.92	2808.12	2941	3108.44	374052	508191	0	0	0	0	0	0	0	0	0	0	0	0	0	0	0	0
Isoleucine	158	3	9.39524	1779.11	2048.17	1906.75	2095.13	1967.75	1833.54	1907.42	2196.65	2365.61	2182.55	2940.74	2478.33	2895.74	2028.18	1915.79	2831.25	8.32481e-15	0	0	0	0	0	0	0	0	0	0	0	0	0	0	0	0	0
Isoleucine	158	4	9.39524	623.74	770.388	545.254	722.699	620.451	671.016	581.983	592.926	605.725	499.953	532.288	653.084	605.186	529.541	623.456	498.619	6.60109e-14	0	0	0	0	0	0	0	0	0	0	0	0	0	0	0	0	0
Isoleucine	158	5	9.39524	9362.38	9624.25	11340.7	11385.9	13874.6	11589.1	10139.5	10270.2	11738.9	13087.9	10456.6	9097.43	10502.4	12376.4	10862	11859.7	10764.7	6892.35	0	0	0	0	0	0	0	0	0	0	0	0	0	0	0	0
Proline	142	0	9.28571	2.08792e+06	4.64973e+06	2.36381e+06	2.27816e+06	2.40532e+06	1.4506e+06	1.19299e+06	1.14234e+06	2.44286e+06	1.68e+06	3.91682e+06	1.24253e+07	3.41672e+06	1.4709e+06	1.35463e+06	1.87686e+06	5.91033e+07	5.90896e+07	0	0	0	0	0	0	0	0	0	0	0	0	0	0	0	0
Proline	142	1	9.28571	9011.87	11010	10428.9	8496.2	9533.8	9328.38	12056	10432.6	11063.1	8012.16	12640.5	22942.9	11206.1	8789	11279	8567.71	8.92403e+06	1.11276e+07	0	0	0	0	0	0	0	0	0	0	0	0	0	0	0	0
Proline	142	2	9.28571	1404.1	2089.25	1690.79	1554.66	1424.53	1221.37	1240.13	1465.59	2477.67	1462.54	2512.34	4895.18	1995.95	1596.21	1751.92	1545.86	594396	708592	0	0	0	0	0	0	0	0	0	0	0	0	0	0	0	0
Proline	142	3	9.28571	375.844	346.157	560.886	565.141	420.255	1159.54	998.059	1150.44	587.544	513.019	734.593	450.155	630.202	1182.68	1483.63	1030.58	2.04527e-13	2.09248e-13	0	0	0	0	0	0	0	0	0	0	0	0	0	0	0	0
Proline	142	4	9.28571	2279.25	709.542	896.166	5202.29	24647.1	681.829	181.19	341.216	5444.93	21964.6	654.119	1384.37	693.874	315.844	69.1053	5575.09	0	0	0	0	0	0	0	0	0	0	0	0	0	0	0	0	0	0
Glycine	276	0	9.3719	2.03304e+06	2.54526e+06	1.87182e+06	2.06844e+06	1.8371e+06	1.59087e+06	1.18845e+06	1.44216e+06	2.83405e+06	2.29322e+06	3.28356e+06	5.99937e+06	4.11837e+06	1.97004e+06	1.65914e+06	2.72023e+06	1.60653e+07	1.86531e+07	0	0	0	0	0	0	0	0	0	0	0	0	0	0	0	0
Glycine	276	1	9.3719	2.18469e-11	0	3.13091e-11	3.34756e-11	0	1.37525e-11	1.64688e-11	3.42216e-11	4.82762e-11	0	0	0	0	0	8.83866e-12	2.2377e-11	1.28046e-10	3.93005e-11	0	0	0	0	0	0	0	0	0	0	0	0	0	0	0	0
Glycine	276	2	9.3719	1.22541e-13	0	0	2.65563e-13	2.04475e-13	1.07492e-13	4.50118e-14	4.41104e-14	0	0	6.48491e-14	0	1.56727e-14	2.0277e-11	1.95619e-14	2.49875e-13	1.21401e-12	1.20308e-12	0	0	0	0	0	0	0	0	0	0	0	0	0	0	0	0
Succinate	247	0	9.43952	242931	245526	232749	274051	475838	284639	232259	228681	152001	164589	161366	208722	171541	120078	126552	122080	2.73491e+07	5.19809e+07	0	0	0	0	0	0	0	0	0	0	0	0	0	0	0	0
Succinate	247	1	9.43952	565.07	1275.79	978.923	885.203	1398.06	1150.35	1211	1367.25	1142.62	978.385	940.94	2067.43	1189.82	956.474	842.254	1125.01	146066	273257	0	0	0	0	0	0	0	0	0	0	0	0	0	0	0	0
Succinate	247	2	9.43952	1674.14	1535.25	1270.67	1824.96	2054.25	1426.46	1693.94	2113.37	2012.93	2205.53	1459.89	1631.37	1624.01	2028.21	2031.26	2002.3	31168.5	41203.4	0	0	0	0	0	0	0	0	0	0	0	0	0	0	0	0
Succinate	247	3	9.43952	375.916	184.245	163.796	212.64	110.389	167.318	223.17	101.713	152.688	317.126	203.927	130.412	188.352	158.437	198.141	160.993	3.51529e-13	5.82539e-13	0	0	0	0	0	0	0	0	0	0	0	0	0	0	0	0
Succinate	247	4	9.43952	948.2	883.517	1156.75	1393.71	1062.07	1196.27	1330.05	1492.78	1958.76	2481.64	1360.57	1188.89	1476.56	2206.89	1789.44	2460.97	0	0	0	0	0	0	0	0	0	0	0	0	0	0	0	0	0	0
Uracil	241	0	9.69571	5.39552e+06	4.00948e+06	3.55567e+06	2.76386e+06	2.36712e+06	2.44601e+06	2.12874e+06	1.89231e+06	1.83466e+06	1.79173e+06	2.09857e+06	2.74509e+06	2.67207e+06	2.3767e+06	2.32588e+06	2.19731e+06	6.32447e+07	6.06268e+07	0	0	0	0	0	0	0	0	0	0	0	0	0	0	0	0
Uracil	241	1	9.69571	4481.33	3911.76	5723.32	5180.05	3510.48	2938.72	4280.6	3760.13	3945.65	2759.12	2154.88	5143.3	6938.98	3245.17	4070.85	4058.29	4.0123e+06	5.54343e+06	0	0	0	0	0	0	0	0	0	0	0	0	0	0	0	0
Uracil	241	2	9.69571	17354.4	15401.3	14722.9	13257.4	12385.5	12225	12497.8	10588.9	10494.2	10040.3	8010.27	9047.39	7448.12	6726.32	7002.38	5820.52	455763	582397	0	0	0	0	0	0	0	0	0	0	0	0	0	0	0	0
Uracil	241	3	9.69571	2154.33	1495.43	1611.41	1690.98	1421.87	1635.32	1749.69	1473.06	1403.5	1197.58	1165.46	960.893	849.082	748.987	621.018	615.06	5.54906e-12	5.95721e-12	0	0	0	0	0	0	0	0	0	0	0	0	0	0	0	0
Uracil	241	4	9.69571	122.361	137.392	117.943	140.994	110.626	166.458	140.849	122.358	148.232	131.702	106.545	73.0699	89.1931	65.1445	79.2491	106.663	0	0	0	0	0	0	0	0	0	0	0	0	0	0	0	0	0	0
Fumarate	245	0	9.81952	710284	817712	792177	870519	605950	641644	827235	799141	919145	912039	1.00641e+06	1.82567e+06	901210	650393	543213	768048	5.19028e+07	5.05133e+07	0	0	0	0	0	0	0	0	0	0	0	0	0	0	0	0
Fumarate	245	1	9.81952	1114.91	825.819	1390.5	0	561.599	252.864	1185.71	1414.8	994.898	375.901	1548.53	3493.97	779.433	1080.26	1280.74	1553.83	4.44682e+06	5.24665e+06	0	0	0	0	0	0	0	0	0	0	0	0	0	0	0	0
Fumarate	245	2	9.81952	1477.21	1418.38	1416.52	1611	1330.02	1400.34	1024.49	1265.59	1985.38	1422.52	1420.11	1834.27	1579.35	1272.95	1090.85	1252.62	584043	669700	0	0	0	0	0	0	0	0	0	0	0	0	0	0	0	0
Fumarate	245	3	9.81952	436.335	445.104	438.988	345.203	577.238	449.39	359.744	225.959	349.018	317.597	287.359	311.969	288.471	365.705	391.527	417.586	4.97866e-12	5.25388e-12	0	0	0	0	0	0	0	0	0	0	0	0	0	0	0	0
Fumarate	245	4	9.81952	869.28	763.91	968.673	1171.76	1391.84	1262.11	926.238	928.921	910.768	1167.78	669.155	365.599	691.321	926.834	1029.11	942.69	0	0	0	0	0	0	0	0	0	0	0	0	0	0	0	0	0	0
Serine	204	0	9.91571	250524	418692	209126	201410	166902	151299	156574	125156	176698	166186	242079	5.17962e+06	234737	190915	230154	213632	5.8827e+07	5.639e+07	0	0	0	0	0	0	0	0	0	0	0	0	0	0	0	0
Serine	204	1	9.91571	183866	156770	243387	234563	243546	246075	220103	237350	165248	181550	140941	80744	138314	151865	143657	196050	7.52808e+06	1.00771e+07	0	0	0	0	0	0	0	0	0	0	0	0	0	0	0	0
Serine	204	2	9.91571	3915.58	4273.27	4390.19	4234.02	3704.02	3981.75	4226.93	3531.42	3000.06	3298.63	2973.27	833.739	2354.16	2770.75	2525.51	3616.75	787227	1.05865e+06	0	0	0	0	0	0	0	0	0	0	0	0	0	0	0	0
Serine 218	218	0	9.91571	208804	302989	164028	158359	137176	115356	132199	105878	148593	145892	192627	3.15811e+06	188531	161919	191849	183337	6.19192e+07	6.22245e+07	0	0	0	0	0	0	0	0	0	0	0	0	0	0	0	0
Serine 218	218	1	9.91571	3088.83	4760.59	4866.96	4202.63	4867.67	4737.22	3618.72	4742.6	3526.83	4006.06	3784.48	939.125	3608.88	3798.82	2750.34	3378.14	2.33728e+06	3.33787e+06	0	0	0	0	0	0	0	0	0	0	0	0	0	0	0	0
Serine 218	218	2	9.91571	0	0	0	0	0	0	0	0	0	0	0	0	0	0	0	0	247474	340413	0	0	0	0	0	0	0	0	0	0	0	0	0	0	0	0
Threonine	291	0	10.1957	13241.7	24504	15981.1	23328.4	39841.2	10932.9	5603.42	7328.57	23124	25210.1	29069.9	1.35179e+06	30109.2	11328	9724.34	20395.9	3.40788e+07	3.91752e+07	0	0	0	0	0	0	0	0	0	0	0	0	0	0	0	0
Threonine	291	1	10.1957	10276.8	12968.9	8377.49	11805.5	14414.9	8735.09	5705.65	6098.98	10164.8	9339.32	10459.9	279841	9588.27	4821.15	5561.93	6938.16	6.19387e+06	7.27114e+06	0	0	0	0	0	0	0	0	0	0	0	0	0	0	0	0
Threonine	291	2	10.1957	3984.7	2667.84	3281.46	1886.78	2072.14	2798.36	4396.05	4019.24	2161.28	2074.96	1508.69	0	1907.52	1798	1414.63	1960.95	0	0	0	0	0	0	0	0	0	0	0	0	0	0	0	0	0	0
Thymine	255	0	10.3557	148567	346562	164074	137578	133695	145357	106053	120663	192710	309451	217038	1.12148e+06	377272	279169	377996	280365	6.0371e+07	5.67294e+07	0	0	0	0	0	0	0	0	0	0	0	0	0	0	0	0
Thymine	255	1	10.3557	60899.7	261975	498787	650925	610881	588238	524419	466307	306827	228988	134235	58455.9	80726.9	72846.1	58954.7	54788.1	6.98942e+06	9.30584e+06	0	0	0	0	0	0	0	0	0	0	0	0	0	0	0	0
Thymine	255	2	10.3557	5174.86	3827.6	4628.41	5502.18	4537.69	4148.29	4473.03	3673.96	2685.34	3276.36	2753.41	2226.8	3916.28	2561.13	1867.95	2432.05	703110	937606	0	0	0	0	0	0	0	0	0	0	0	0	0	0	0	0
Thymine	255	3	10.3557	2145.78	1661.56	2019.04	2323.19	2375.46	2269.4	2232.77	2036.88	1833.98	1639.01	2578.33	2319.18	1707.88	2015.55	1477.69	2055.42	8.90918e-14	9.95025e-14	0	0	0	0	0	0	0	0	0	0	0	0	0	0	0	0
Thymine	255	4	10.3557	468.692	370.087	375.442	298.734	355.795	299.452	345.596	367.791	335.679	319.379	400.425	263.272	328.998	351.152	304.548	382.019	17637.7	14362.2	0	0	0	0	0	0	0	0	0	0	0	0	0	0	0	0
Thymine	255	5	10.3557	27.7923	35.7366	36.9391	29.4935	31.5043	25.2235	30.7658	40.6148	28.4725	11.2233	55.5589	32.2599	32.1428	54.0422	37.0458	62.7486	0	0	0	0	0	0	0	0	0	0	0	0	0	0	0	0	0	0
Erythrose	205	0	10.8695	7826	8460.28	7389.38	6768.76	14434.3	10657.8	7572.68	8328.31	6400.86	5915.11	6821.52	8815.97	6962.83	5515.57	3989.13	5885.85	1.39042e+07	1.52675e+07	0	0	0	0	0	0	0	0	0	0	0	0	0	0	0	0
Erythrose	205	1	10.8695	0	0	0	0	0	0	0	0	0	0	0	0	0	0	0	0	0	0	0	0	0	0	0	0	0	0	0	0	0	0	0	0	0	0
Erythrose	205	2	10.8695	134341	131903	139415	144198	140449	137940	122816	129520	141580	135649	133579	153978	129314	137349	144174	148399	28443.4	32572.3	0	0	0	0	0	0	0	0	0	0	0	0	0	0	0	0
Malate	245	0	11.2395	480954	665223	526969	520914	468586	406876	343999	310554	489728	505311	671928	1.87966e+06	552461	344829	280289	516682	2.15199e+07	2.42461e+07	0	0	0	0	0	0	0	0	0	0	0	0	0	0	0	0
Malate	245	1	11.2395	1603.98	2196.25	1878.74	1858.3	1402.89	1533.15	2140.84	2463.76	2698.45	1468.56	2117.69	3511.15	1783.5	882.257	2944.93	1033.73	0	0	0	0	0	0	0	0	0	0	0	0	0	0	0	0	0	0
Malate	245	2	11.2395	2401.81	3120.22	2178.5	2275.09	2065.99	2100.5	2009.4	1746.86	2513.8	2128.27	2910.32	6259.57	2819.47	1669.17	1518.94	1671.49	105193	135461	0	0	0	0	0	0	0	0	0	0	0	0	0	0	0	0
Malate	245	3	11.2395	102.547	83.0378	103.287	85.3626	151.665	100.489	91.6402	197.346	102.04	133.668	70.0622	131.304	65.5788	66.4402	89.8011	140.391	17.5531	22.6513	0	0	0	0	0	0	0	0	0	0	0	0	0	0	0	0
Malate	245	4	11.2395	382.539	329.583	467.912	448.056	528.128	534.542	508.234	552.355	405.71	394.53	305.08	191.246	314.319	481.089	498.997	353.29	226.006	373.678	0	0	0	0	0	0	0	0	0	0	0	0	0	0	0	0
Aspartate	334	0	11.5695	2199.24	5164.45	1677.86	3103.99	438.671	893.315	832.602	1158.98	4013.77	1890.23	11158.1	931943	10083.6	994.513	633.567	2000.52	3.77574e+06	4.39744e+06	0	0	0	0	0	0	0	0	0	0	0	0	0	0	0	0
Aspartate	334	1	11.5695	402.582	509.986	172.021	8.4465e-16	469.153	199.516	102.575	514.139	455.587	466.05	930.691	7747.18	858.466	132.139	351.958	197.07	3635.29	9084.03	0	0	0	0	0	0	0	0	0	0	0	0	0	0	0	0
Aspartate	334	2	11.5695	487.86	416.223	523.487	1017.84	2083.37	1249.98	1257.43	535.623	896.249	623.628	740.369	2099.09	932.276	687.003	1271.63	1925.54	804.408	492.68	0	0	0	0	0	0	0	0	0	0	0	0	0	0	0	0
Aspartate	334	3	11.5695	0	34.3138	24.7448	5.60977e-17	0	79.0274	0	30.247	0	0	8.49418e-17	96.9041	0	1.24099e-16	117.385	0	435.344	243.542	0	0	0	0	0	0	0	0	0	0	0	0	0	0	0	0
Aspartate	334	4	11.5695	15.8281	16.5164	65.8513	3.98011	78.327	37.071	252.418	54.0646	11.3915	10.5772	0	2.20895	49.4054	80.0461	17.6002	79.8943	2.2228	0	0	0	0	0	0	0	0	0	0	0	0	0	0	0	0	0
Aspartate 232	232	0	11.5695	155820	320609	126436	196686	94264.7	83410.6	74935.4	63143.8	263421	118215	768662	4.31677e+07	752697	89308.1	81851.6	169322	5.95815e+07	5.77728e+07	0	0	0	0	0	0	0	0	0	0	0	0	0	0	0	0
Aspartate 232	232	1	11.5695	2217.95	2099.01	2397.62	2094.8	2374.5	1775.57	2237.88	3020.34	2819.27	1958.48	3769.07	404797	1938.58	2361.61	2733.89	1310.45	8.29035e+06	1.10729e+07	0	0	0	0	0	0	0	0	0	0	0	0	0	0	0	0
Aspartate 232	232	2	11.5695	1279.22	1472.98	1733.19	1457.99	2322.51	3140.64	2022.44	2384.67	722.3	807.597	1091.87	57595.2	560.198	526.637	714.96	501.752	941632	1.27147e+06	0	0	0	0	0	0	0	0	0	0	0	0	0	0	0	0
Aspartate 232	232	3	11.5695	247.854	139.406	210.2	191.147	320.025	184.553	309.991	309.323	246.462	178.562	113.74	379.74	129.274	171.478	227.442	178.546	1.6002e-11	1.79451e-11	0	0	0	0	0	0	0	0	0	0	0	0	0	0	0	0
Methionine	293	0	11.5857	2850.61	11872.7	2064.97	1922.64	667.972	660.029	797.991	695.872	2385.94	1187.25	14808.1	450581	12750.6	996.65	663.582	1967.86	1.321e+07	1.51515e+07	0	0	0	0	0	0	0	0	0	0	0	0	0	0	0	0
Methionine	293	1	11.5857	341.188	955.662	567.225	474.658	235.117	302.864	263.613	420.602	774.266	347.682	327.732	23661.2	917.536	539.167	317.053	334.632	61559.7	67441.8	0	0	0	0	0	0	0	0	0	0	0	0	0	0	0	0
Methionine	293	2	11.5857	8362.49	4913.91	8205.61	7795.89	9942.34	8735.25	8922.52	9215.72	7367	9520.36	6011.53	2.17576e-14	5612.75	8257.61	9280.02	9701.29	0	0	0	0	0	0	0	0	0	0	0	0	0	0	0	0	0	0
Methionine	293	3	11.5857	857.359	701.671	742.403	802.091	1156.63	1227.63	822.268	835.404	784.792	583.523	376.506	1.42755e-15	465.002	884.366	1075.35	684.593	0	0	0	0	0	0	0	0	0	0	0	0	0	0	0	0	0	0
Methionine	293	4	11.5857	1051.19	682.624	1248.2	998.731	1254.96	920.358	747.99	876.245	979.687	758.399	784.812	116.612	539.105	757.486	770.898	1229.75	1.48064e-13	1.54878e-13	0	0	0	0	0	0	0	0	0	0	0	0	0	0	0	0
Methionine	293	5	11.5857	2.67113e-19	0	0	0	6.36038e-18	0	0	6.59934e-18	0	0	0	0	0	1.21382e-19	3.37526e-17	0	0	0	0	0	0	0	0	0	0	0	0	0	0	0	0	0	0	0
Methionine 176	176	0	11.5857	37358.2	165490	33750.1	25939.8	3712.66	2465.44	6666.83	6343.68	25703.6	7777.83	186921	2.61446e+06	173132	12216.5	4921.04	26254.6	6.4194e+07	6.2579e+07	0	0	0	0	0	0	0	0	0	0	0	0	0	0	0	0
Methionine 176	176	1	11.5857	5296.13	4821.57	6798.03	7920.06	10051.1	8806.94	6807.83	7763.74	6726.38	6538.68	5008.56	20868.3	4209.61	4406.67	4955.82	5752.72	1.40524e+06	1.98712e+06	0	0	0	0	0	0	0	0	0	0	0	0	0	0	0	0
Methionine 176	176	2	11.5857	1184.98	943.802	1306.13	1420.14	1766.41	1963.82	1620.89	1831.9	1631.82	1798.37	978.113	486.386	987.237	1960.02	1454.41	1635.75	394990	558077	0	0	0	0	0	0	0	0	0	0	0	0	0	0	0	0
Methionine 176	176	3	11.5857	4070.41	2327.64	4570.42	4748.48	8106.85	8034.07	6512.67	6252.44	6400.15	9282.85	3098.79	940.655	2329.78	7018.23	9533.79	6080.18	1.00889e-13	1.29081e-13	0	0	0	0	0	0	0	0	0	0	0	0	0	0	0	0
Methionine 176	176	4	11.5857	621.771	553.483	856.016	928.11	1078.57	1118.56	1040.11	1037.49	861.976	1127.46	487.984	153.308	502.327	1021.36	1343	978.359	0	0	0	0	0	0	0	0	0	0	0	0	0	0	0	0	0	0
5-oxoproline	156	0	11.6133	6.64181e+06	1.14401e+07	6.71839e+06	9.67993e+06	6.2489e+06	4.70892e+06	3.47527e+06	2.79421e+06	1.19723e+07	8.10733e+06	2.3088e+07	4.86409e+07	2.28119e+07	4.31238e+06	3.47137e+06	9.39069e+06	5.7336e+07	6.49427e+07	0	0	0	0	0	0	0	0	0	0	0	0	0	0	0	0
5-oxoproline	156	1	11.6133	13743.4	24865.6	15361.2	21089.3	12135.1	10480.2	9850.97	8664.43	35678.2	16835.1	47267.8	629304	43294.2	13186.2	16528.2	16951	3.33296e+06	4.59124e+06	0	0	0	0	0	0	0	0	0	0	0	0	0	0	0	0
5-oxoproline	156	2	11.6133	6288.04	9127.13	6052.56	7001.44	5110.08	4254.32	4195.77	3983.51	11784.6	7289.95	14064	75329.2	10667	4589.38	5206.22	5932.14	324414	431311	0	0	0	0	0	0	0	0	0	0	0	0	0	0	0	0
5-oxoproline	156	3	11.6133	152.137	158.943	137.195	134.127	138.284	115.325	145.073	128.325	162.377	126.501	144.482	2.85695e-14	148.21	79.0758	142.716	94.8286	0	1.70316e-13	0	0	0	0	0	0	0	0	0	0	0	0	0	0	0	0
5-oxoproline	156	4	11.6133	2703.26	3763.69	5582.5	4550.83	7640.64	10127	10924.8	11098.4	2272.35	1551.47	889.187	989.513	740.598	998.762	1216.23	678.853	85285.3	85185	0	0	0	0	0	0	0	0	0	0	0	0	0	0	0	0
Cysteine 218	218	0	11.9295	12591.9	31729.3	9872.82	10298.9	48657	33855.3	8858.07	8560.68	16430.7	12123.8	21813.5	2.06014e+06	23514.8	5924.37	24843.1	10501.9	1.48909e+07	1.70995e+07	0	0	0	0	0	0	0	0	0	0	0	0	0	0	0	0
Cysteine 218	218	1	11.9295	853.232	192.581	2561.77	1028.56	5.54965e-13	3.7007e-13	1211.45	2364.72	81.9346	1739.93	177.292	0	2908.28	5473.96	2.69488e-13	1194.58	0	0	0	0	0	0	0	0	0	0	0	0	0	0	0	0	0	0
Cysteine 218	218	2	11.9295	757151	2.18894e+06	523089	523141	3.92093e+06	2.58792e+06	467004	440495	982290	697389	650709	3.15323e+06	803397	224130	1.83557e+06	520155	1.94014e+07	2.22515e+07	0	0	0	0	0	0	0	0	0	0	0	0	0	0	0	0
Cysteine	220	0	11.9295	736598	2.25569e+06	497935	488955	4.07472e+06	2.66762e+06	432682	412367	969783	691398	652127	5.98834e+06	825251	203881	1.8632e+06	484626	3.83963e+07	4.40177e+07	0	0	0	0	0	0	0	0	0	0	0	0	0	0	0	0
Cysteine	220	1	11.9295	60275.6	89486.1	53872.6	54439.2	126427	97190.5	56799.1	56386.5	66188.5	52980.9	50333.6	19149.4	56769.2	52821.6	84441.9	54851.1	133855	161247	0	0	0	0	0	0	0	0	0	0	0	0	0	0	0	0
Cysteine	220	2	11.9295	847.538	4.01841e-14	2119.21	2934	9.67754e-14	5.62251e-14	941.798	1506.02	0	0	3489.57	2.56822e-13	2947.65	1726.38	3.10867e-14	3063.64	5.9248e-13	1.87192e-12	0	0	0	0	0	0	0	0	0	0	0	0	0	0	0	0
aKG	304	0	12.0995	3261.76	2766.73	4162.71	4477	4226.29	3632.03	3540.86	3966.08	2389.58	2386.35	15921.8	26009.8	4439.6	2185.42	1768.71	4805.73	8.77464e+06	1.15977e+07	0	0	0	0	0	0	0	0	0	0	0	0	0	0	0	0
aKG	304	1	12.0995	407.266	538.965	399.712	683.617	675.75	533.252	879.694	203.656	229.365	338.749	358.24	415.188	159.195	264.791	846.216	498.616	3.31015e-13	2.1139e-13	0	0	0	0	0	0	0	0	0	0	0	0	0	0	0	0
aKG	304	2	12.0995	157.737	402.022	209.228	47.7414	844.264	321.886	0	213.451	404.384	97.0488	158.088	80.4548	194.58	168.118	69.1891	116.514	1.06998e-13	3.39636e-14	0	0	0	0	0	0	0	0	0	0	0	0	0	0	0	0
aKG	304	3	12.0995	6246.64	11819.9	3482.8	3546.24	1530.55	2939.84	1307.78	1851.38	6294.45	14617.8	1669.5	21484.2	8829.13	7294.92	4755.82	3287.53	2.30834e+06	2.13395e+06	0	0	0	0	0	0	0	0	0	0	0	0	0	0	0	0
aKG	304	4	12.0995	59.0266	354.193	47.0231	8.12335e-17	175.715	148.826	141.359	82.1132	254.126	151.285	39.1139	357.51	210.778	290.041	145.558	6.87503	11838.8	8822.29	0	0	0	0	0	0	0	0	0	0	0	0	0	0	0	0
aKG	304	5	12.0995	325.494	138.794	228.98	128.486	268.86	104.782	119.198	337.973	197.232	289.13	283.525	347.329	319.587	68.3332	262.045	310.063	4.36739e-14	1.19599e-13	0	0	0	0	0	0	0	0	0	0	0	0	0	0	0	0
PEP	369	0	12.3271	448423	302826	420283	513825	397304	686998	400600	244806	530604	202730	371187	424264	489115	147610	160542	285605	4.95053e+07	5.34098e+07	0	0	0	0	0	0	0	0	0	0	0	0	0	0	0	0
PEP	369	1	12.3271	274.94	1223.97	574.66	722.013	195.751	0	1509.4	554.718	537.687	809.322	1122.25	402.162	898.784	0	682.445	1104.33	363722	554602	0	0	0	0	0	0	0	0	0	0	0	0	0	0	0	0
PEP	369	2	12.3271	242.399	885.129	495.444	795.759	1236.8	918.896	1263.61	960.86	697.795	369.212	745.841	783.952	206.107	752.904	557.811	1015.68	55949.4	74169.9	0	0	0	0	0	0	0	0	0	0	0	0	0	0	0	0
PEP	369	3	12.3271	3808.78	2021.71	3082.58	4788.08	2710.68	3355.59	3308.68	1313.57	7617.97	2460.29	2552.47	5016.59	2393.63	591.095	1068.31	1285.35	0	1.13217e-13	0	0	0	0	0	0	0	0	0	0	0	0	0	0	0	0
Glutamate	348	0	12.5433	3701.1	19813.6	2775.33	7336.58	2586.59	2917.12	2239.48	2193.09	15822.6	8070.17	224152	1.68366e+06	144037	2176.93	1618.86	6660.02	2.61628e+06	2.32608e+06	0	0	0	0	0	0	0	0	0	0	0	0	0	0	0	0
Glutamate	348	1	12.5433	260.194	233.153	241.226	57.581	263.675	4.89848e-16	3.94592e-18	92.8412	60.0857	118.856	1733.44	5175.42	205.014	158.285	2.87211	1.05031e-16	1007.27	1644.65	0	0	0	0	0	0	0	0	0	0	0	0	0	0	0	0
Glutamate	348	2	12.5433	2.94325e-17	483.238	1.08853e-17	41.0874	798.765	19.7606	4.47026	1.42584e-18	96.5245	0	0	2710.24	236.275	0	7.03144e-17	35.4138	1.43544e-14	7.90559e-15	0	0	0	0	0	0	0	0	0	0	0	0	0	0	0	0
Glutamate	348	3	12.5433	0	86.9723	6.93332	0	171.835	0	1.96898	24.953	42.7099	0	42.4989	157.775	28.9749	0	0	58.4641	66.7641	143.715	0	0	0	0	0	0	0	0	0	0	0	0	0	0	0	0
Glutamate	348	4	12.5433	72.5764	5.31149	192.497	2.54278	25.5575	221.699	99.9202	14.1925	31.8447	55.632	21.1298	13.921	14.3146	12.3261	0.343514	19.8885	201.314	226.641	0	0	0	0	0	0	0	0	0	0	0	0	0	0	0	0
Glutamate	348	5	12.5433	49.1341	354.271	7.67206	185.629	11.1414	8.85715	36.0278	89.1364	370.562	42.3016	134.76	158.662	105.343	85.6594	537.564	205.618	17.4065	37.5798	0	0	0	0	0	0	0	0	0	0	0	0	0	0	0	0
Glutamate 246	246	0	12.5433	34011.6	279045	39167.3	84225.2	43874.2	25072	16983	12357.5	225121	95625.4	2.86061e+06	2.02229e+07	1.85327e+06	25423.4	18922	84004.9	1.86924e+07	2.06658e+07	0	0	0	0	0	0	0	0	0	0	0	0	0	0	0	0
Glutamate 246	246	1	12.5433	1784.73	2436.34	1884.92	2122.99	2232.72	2156.4	1187.92	1785.86	2420.97	778.815	10173.8	73422.1	4155.43	1040.93	1732.19	1486.22	29557.3	27691.4	0	0	0	0	0	0	0	0	0	0	0	0	0	0	0	0
Glutamate 246	246	2	12.5433	3072.23	2221.26	1658.26	2489.83	875.183	995.323	2148.56	4584.55	2720.73	2467.55	4815.41	19348.4	7078.11	2696.34	1551.13	4090.28	13307.7	19663.4	0	0	0	0	0	0	0	0	0	0	0	0	0	0	0	0
Glutamate 246	246	3	12.5433	3075.56	1004.13	2958.08	1574.77	2762.1	3551.69	3657.88	3635.82	1173.37	1547.46	319.443	264.793	378.1	2937.67	3504.19	2387.29	765.835	771.536	0	0	0	0	0	0	0	0	0	0	0	0	0	0	0	0
Glutamate 246	246	4	12.5433	238.995	101.131	228.719	154.089	319.434	247.952	273.97	342.895	111.422	153.082	14.7612	35.7125	32.9439	195.539	165.068	183.861	26.5868	31.1521	0	0	0	0	0	0	0	0	0	0	0	0	0	0	0	0
Phenylalanine	192	0	12.6433	10215.1	20746.3	10178.4	11002.9	11537	8614.58	6632.05	7753.73	11227.9	7311.9	26315	2.33018e+06	30965.3	6888.57	5759.03	12427.3	5.97357e+07	5.89387e+07	0	0	0	0	0	0	0	0	0	0	0	0	0	0	0	0
Phenylalanine	192	1	12.6433	41588.1	36374.7	41918.7	42375.4	49058.8	44246.4	39183.5	42955.1	45097.1	47072.4	42293.4	23722.5	38434.2	44104.9	47928.2	49353.2	1.62323e+06	2.45265e+06	0	0	0	0	0	0	0	0	0	0	0	0	0	0	0	0
Phenylalanine	192	2	12.6433	641.186	479.768	685.547	741.405	681.086	835.675	680.6	529.097	887.099	851.988	748.591	551.868	658.3	756.188	513.519	860.165	47086.2	67798.6	0	0	0	0	0	0	0	0	0	0	0	0	0	0	0	0
Phenylalanine	192	3	12.6433	2196.82	2167.14	2276.4	2399.15	2839.28	2358.69	2204.19	2363.87	2262.32	2391.35	2105.52	515.677	1768.68	2328.45	2160.18	2268.53	0	0	0	0	0	0	0	0	0	0	0	0	0	0	0	0	0	0
Phenylalanine	192	4	12.6433	157.836	141.258	222.296	240.568	279.563	224.831	157.309	193.139	159.803	264.312	166.998	40.8056	141.578	146.284	183.493	251.676	27.4683	2.262	0	0	0	0	0	0	0	0	0	0	0	0	0	0	0	0
Phenylalanine	192	5	12.6433	1752.7	1798.94	1456.28	1547.08	2022.92	1947.02	934.59	1124.69	1429.55	1107.76	1677.97	639.077	1244.18	768.261	1128.39	993.195	39.9675	70.6794	0	0	0	0	0	0	0	0	0	0	0	0	0	0	0	0
Phenylalanine	192	6	12.6433	279.562	292.06	328.873	243.388	344.75	311.923	391.125	338.526	444.812	257.925	340.956	82.7743	331.777	285.931	318.168	381.771	17.5827	23.8244	0	0	0	0	0	0	0	0	0	0	0	0	0	0	0	0
Phenylalanine	192	7	12.6433	459.086	476.29	267.558	415.656	357.829	314.422	280.918	303.944	303.245	342.799	558.356	123.775	465.329	338.194	314.271	401.705	98.2986	106.207	0	0	0	0	0	0	0	0	0	0	0	0	0	0	0	0
Phenylalanine	192	8	12.6433	915.898	2208.92	1340.92	1316.86	1527.05	1001.9	872.9	1171.61	1788.84	899.914	1889.51	1023.49	1293.41	858.554	688.686	1443.46	246.204	244.21	0	0	0	0	0	0	0	0	0	0	0	0	0	0	0	0
Phenylalanine 218	218	0	12.6433	24290.9	55684.4	27667.1	39175.5	25531.3	13694.1	15847.7	17801.6	30674.3	17363.5	90726.4	3.9961e+06	94726.8	15963.8	13296.7	40712.3	4.81002e+07	4.47671e+07	0	0	0	0	0	0	0	0	0	0	0	0	0	0	0	0
Phenylalanine 218	218	1	12.6433	10868.2	13755.7	9236.81	9584.3	13415.5	14281	9406.85	9642.71	13227.8	9738.69	9056.15	5822.12	7507.48	7143.52	8126.46	9971.26	1.96423e+07	2.67932e+07	0	0	0	0	0	0	0	0	0	0	0	0	0	0	0	0
Phenylalanine 218	218	2	12.6433	8345.06	6145.06	7613.88	5523.43	9174.6	8772.09	8503.51	8077.12	8898.43	11321.1	5754.92	405.989	5826.65	12806.3	13523.6	7473.3	607705	797798	0	0	0	0	0	0	0	0	0	0	0	0	0	0	0	0
Asparagine	231	0	12.9971	6009.54	5485.32	5614.38	4387.89	2372.85	2407.93	2227.44	2549.7	3721.86	2391.74	4826.21	399150	5018.23	4832.26	3354.55	5373.71	5.28294e+07	5.52542e+07	0	0	0	0	0	0	0	0	0	0	0	0	0	0	0	0
Asparagine	231	1	12.9971	1467.26	1730.41	2671.3	4857.88	10502.6	7553.49	6506.61	6575.92	5995.22	5468.59	4247.56	5684.29	3715.57	2721.89	2215.35	1829.71	485030	547096	0	0	0	0	0	0	0	0	0	0	0	0	0	0	0	0
Asparagine	231	2	12.9971	4231.03	8634.76	4953.47	4176.8	3111.23	2635.04	2504.72	2369.48	3304.41	3137.49	4825.3	3493.44	3697.58	2056.7	2016	4014.12	20269.5	1.85511e-11	0	0	0	0	0	0	0	0	0	0	0	0	0	0	0	0
Asparagine	231	3	12.9971	2217.4	3823.7	3089.55	5429.89	31941.5	13221.2	12216.4	9699.96	9516.97	8893.23	5907.24	1882.44	4383.51	2533.13	2775.94	2569.55	145058	1.05202e+06	0	0	0	0	0	0	0	0	0	0	0	0	0	0	0	0
Ribose	307	0	13.14	1520.42	1498.62	1296.4	2696.6	5170.6	3223.04	896.899	1038.64	1058.38	765.053	1079.02	3865.4	1721.37	756.42	859.265	1268.22	18742.2	26325.8	0	0	0	0	0	0	0	0	0	0	0	0	0	0	0	0
Ribose	307	1	13.14	475.078	1210.56	203.539	0	102.264	16.0888	199.923	196.711	1215.17	469.403	2269.39	3668.56	1307.74	344.293	684.993	792.634	11809.8	7768	0	0	0	0	0	0	0	0	0	0	0	0	0	0	0	0
Ribose	307	2	13.14	163.415	471.028	1032.01	379.463	1104.59	549.029	204.323	622.109	685.325	380.602	467.627	474.507	39.8364	863.656	171.218	783.107	761.238	833.928	0	0	0	0	0	0	0	0	0	0	0	0	0	0	0	0
Ribose	307	3	13.14	2689.14	1074.26	1095.72	1821.91	849.148	1436.86	1964.69	1014.83	1104.19	1900.61	913.038	1155.8	1777.2	1348.11	615.361	356.204	3415.65	1242.58	0	0	0	0	0	0	0	0	0	0	0	0	0	0	0	0
Glutamine	347	0	13.931	4935.56	3000.43	3544.89	4201.91	4131.82	3883.18	3571.19	3459.48	3563.58	2272.65	2344.11	1752.99	2711.71	2460.53	2535.4	2675.53	998237	448823	0	0	0	0	0	0	0	0	0	0	0	0	0	0	0	0
Glutamine	347	1	13.931	740.121	1205.44	656.002	1022.11	48.5834	0	308.984	432.668	139.813	1297.9	2417.38	3904.54	675.013	477.49	91.3253	1583.94	651819	759560	0	0	0	0	0	0	0	0	0	0	0	0	0	0	0	0
Glutamine	347	2	13.931	4.73018e-17	101.417	93.9151	0	692.463	8.93221e-18	11.74	13.8448	271.57	0	53.3212	62.6821	2.51926e-17	11.039	0	0	44539.1	64367.8	0	0	0	0	0	0	0	0	0	0	0	0	0	0	0	0
Glutamine	347	3	13.931	43.5039	0	0	0	29.5284	0	0	5.6748	0	0	1.63386e-16	384.78	3.0376e-16	2.73743e-17	0	0	1191.08	1557.62	0	0	0	0	0	0	0	0	0	0	0	0	0	0	0	0
Glutamine	347	4	13.931	9.70021	3.70312e-16	1.01812e-16	1.80063e-15	13.6542	0	7.93751e-17	1.35879e-17	0	3.78159	71.8252	1783.41	188.613	97.6882	3.65342e-16	50.3145	269.518	347.325	0	0	0	0	0	0	0	0	0	0	0	0	0	0	0	0
Glutamine	347	5	13.931	2178.7	5253.86	2828.08	2075.8	1275.04	1500.03	1876.98	2096.46	5432.51	2683.01	7010.35	5861.67	7738.39	3369.04	3805.38	5112.89	9.02971	38.0635	0	0	0	0	0	0	0	0	0	0	0	0	0	0	0	0
Glutamine 156	156	0	13.931	37003.4	35348.8	34798.8	37803.8	34223.9	37746	39407.5	37585.2	30201.4	36540.1	33327.2	36563.9	31519.7	32805	37695.3	30035.9	1.52975e+07	9.47043e+06	0	0	0	0	0	0	0	0	0	0	0	0	0	0	0	0
Glutamine 156	156	1	13.931	4907.05	4991.69	5906.03	6036.3	7670.36	6002.4	6459.57	6143.96	4696.79	3379.5	4213.42	8969.64	4026.24	3169.72	2972.68	3230.19	87856.9	70610.6	0	0	0	0	0	0	0	0	0	0	0	0	0	0	0	0
Glutamine 156	156	2	13.931	1460.66	1721.14	1804.34	1319.35	2271.48	1634.23	1551.59	1280.5	1536.29	1417.83	1893.9	3828.58	1570.47	1176.93	1009.17	1237.32	13355.3	14794.4	0	0	0	0	0	0	0	0	0	0	0	0	0	0	0	0
Glutamine 156	156	3	13.931	1868.72	1747.38	1286.28	1522.3	1889.08	1641.35	1030.11	1358.59	1324.64	1187.07	1336.88	1985.86	1338.98	1645.15	1638.39	3988.07	7854.26	13158	0	0	0	0	0	0	0	0	0	0	0	0	0	0	0	0
Glutamine 156	156	4	13.931	7285.65	15673.1	9701.64	11055.3	9191.24	8286.04	8213.89	8134.37	16046.5	9842.02	22026.9	22354.3	19153.5	10416.9	9817.29	14054.7	8233.88	7383.77	0	0	0	0	0	0	0	0	0	0	0	0	0	0	0	0
Citrate	375	0	14.3071	1.57118e+06	2.77554e+06	1.66321e+06	1.76272e+06	1.6327e+06	1.22169e+06	1.11092e+06	1.2913e+06	2.12642e+06	1.87229e+06	3.07171e+06	6.21837e+06	2.66348e+06	1.42898e+06	1.33288e+06	1.77928e+06	2.489e+07	3.01863e+07	0	0	0	0	0	0	0	0	0	0	0	0	0	0	0	0
Citrate	375	1	14.3071	3002.07	4371.7	866.569	1869.08	348.14	0	0	2620.27	5811.31	1736.54	0	9420.35	209.015	0	4416.42	0	0	0	0	0	0	0	0	0	0	0	0	0	0	0	0	0	0	0
Citrate	375	2	14.3071	3831.26	7581.66	5593.3	5333.83	3754.45	2376.8	3823.06	3589.52	9433.2	4860.55	8736.44	22826.5	7823.86	4425.61	5142.56	3764.54	40385	38903.3	0	0	0	0	0	0	0	0	0	0	0	0	0	0	0	0
Citrate	375	3	14.3071	166.878	267.477	3.42741	9.6327e-15	4.74393e-15	178.47	36.0341	211.714	188.759	31.6565	238.439	264.971	279.48	0	253.43	158.447	201.814	93.692	0	0	0	0	0	0	0	0	0	0	0	0	0	0	0	0
Citrate	375	4	14.3071	81.4711	105.665	45.7657	67.179	50.2069	50.6821	16.7374	48.4219	83.3378	60.5249	85.0624	216.589	91.6573	66.7869	41.3389	48.1838	443.156	588.535	0	0	0	0	0	0	0	0	0	0	0	0	0	0	0	0
Citrate	375	5	14.3071	2.11351	5.92544	6.08759	6.70911	2.20433	0.143215	4.74418	0.802648	8.3272	7.10076	6.68812	13.1316	2.65008	1.14584	0	0.314337	12.9337	9.92348	0	0	0	0	0	0	0	0	0	0	0	0	0	0	0	0
Citrate	375	6	14.3071	1.93576	2.66374	0.10468	0.212335	0.949796	0.055941	4.13891e-16	0.644491	1.05693	0.827128	1.09344	3.31057	1.53421	1.00032e-15	0.503419	7.74934e-16	1.22605e-14	8.86845e-15	0	0	0	0	0	0	0	0	0	0	0	0	0	0	0	0
Ornithine	174	0	14.3071	44212.2	169872	95743.2	115522	176383	158328	103959	127615	173936	108196	188071	733172	104125	38848.9	33637.4	62106.5	4.26513e+07	5.1927e+07	0	0	0	0	0	0	0	0	0	0	0	0	0	0	0	0
Ornithine	174	1	14.3071	15641.8	11557.1	11204.7	9997.81	6057.24	4285.39	5881	6040.81	7476.39	11207.8	13573.8	14882.9	16513.3	12883.7	13133.2	13950.1	1.88521e-09	2.32274e-09	0	0	0	0	0	0	0	0	0	0	0	0	0	0	0	0
Methyl-citrate	389	0	14.61	4851.86	4930.54	4124.63	3412.58	4232.75	4593.65	1769.1	5506.93	4279.98	4190.97	5211.53	5593.85	5094.7	4161.69	3243.63	3179.8	26777.1	18088.6	0	0	0	0	0	0	0	0	0	0	0	0	0	0	0	0
Methyl-citrate	389	1	14.61	0	0	0	107.05	0	4.88434e-16	5.3749e-16	0	0	9.05602e-18	85.4606	627.853	82.886	0	0	0	80962.9	75049.8	0	0	0	0	0	0	0	0	0	0	0	0	0	0	0	0
Methyl-citrate	389	2	14.61	0	0	3.45415e-18	0	0	2.42914e-17	0	0	3.13647e-18	0	0	447.326	0	5.14702e-17	0	18.7238	4331.33	3003.68	0	0	0	0	0	0	0	0	0	0	0	0	0	0	0	0
Methyl-citrate	389	3	14.61	0	105.178	169.066	2.17946	73.3817	0	0	0	26.6736	2.62578	408.53	2295.57	7.53538	0	0	105.408	44571.3	41337.4	0	0	0	0	0	0	0	0	0	0	0	0	0	0	0	0
Methyl-citrate	389	4	14.61	53.1991	18.8013	19.9154	20.9831	27.3132	6.14044	0	7.2685e-16	90.2549	0.851461	201.237	505.538	133.322	23.6859	3.55868e-15	171.312	0	7.52257e-15	0	0	0	0	0	0	0	0	0	0	0	0	0	0	0	0
Methyl-citrate	389	5	14.61	7.96343	205.171	1.3674e-17	6.61996	0	0	0	0	0	22.7288	88.6855	380.199	10.5372	0	0	0	296990	536095	0	0	0	0	0	0	0	0	0	0	0	0	0	0	0	0
Methyl-citrate	389	6	14.61	0	66.7066	1.95758	0	0	0	0	0	137.454	0	0	30.2844	0	0	0	0	1122.99	2619.66	0	0	0	0	0	0	0	0	0	0	0	0	0	0	0	0
Methyl-citrate	389	7	14.61	0	0	25.6272	0	16.2945	1.14738	237.847	0	0	0	0	0	0	0	0	0	0	7.1008e-16	0	0	0	0	0	0	0	0	0	0	0	0	0	0	0	0
Lysine (1)	174	0	14.6471	90801.1	1.41113e+06	236683	338228	439879	182089	70469.1	108976	435657	303959	1.83655e+06	2.22979e+07	818655	46497.8	41631.2	237615	7.01377e+07	6.79838e+07	0	0	0	0	0	0	0	0	0	0	0	0	0	0	0	0
Lysine (1)	174	1	14.6471	4243.72	13842.1	5914.64	6122.13	6669.7	3947.85	3134.9	3496.1	7845.46	4528.2	15619.9	156120	9588.06	3359.18	2924.63	5029.04	4.5809e+06	6.16632e+06	0	0	0	0	0	0	0	0	0	0	0	0	0	0	0	0
Lysine (1)	174	2	14.6471	712.14	4577.84	1416.31	1492.74	1426.27	1067.14	672.551	614.309	1583.74	1235.93	5503.05	63384.6	2771.74	665.702	772.372	1176.62	897830	1.15446e+06	0	0	0	0	0	0	0	0	0	0	0	0	0	0	0	0
Lysine (1)	174	3	14.6471	9605.96	1994.23	6092.5	5422.35	5801.63	7149.46	8854.73	8768.51	4269.94	4808.86	1858.66	929.343	2566.7	8246.72	7447.16	5543.64	1.37478e-13	1.46556e-13	0	0	0	0	0	0	0	0	0	0	0	0	0	0	0	0
Lysine (1)	174	4	14.6471	416.94	103.032	272.095	239.035	269.583	434.888	350.689	460.207	183.659	202.444	92.9017	12.9011	103.792	565.229	677.497	294.493	3.61685e-15	0	0	0	0	0	0	0	0	0	0	0	0	0	0	0	0	0
Lysine (1)	174	5	14.6471	1971.55	375.218	1289.05	1042.33	1188.64	1698.6	2477.22	2076.73	995.491	1195.79	286.651	42.2685	485.168	2695.21	2691.47	1405.63	367.383	281.035	0	0	0	0	0	0	0	0	0	0	0	0	0	0	0	0
Fructose	307	0	14.7557	8.81337e+06	7.01201e+06	9.55486e+06	1.43086e+07	2.10997e+07	1.10201e+07	7.99257e+06	1.07093e+07	1.7991e+06	2.9977e+06	1.42859e+06	1.02638e+06	1.6068e+06	1.07129e+06	890761	1.64571e+06	2.28879e+07	2.49097e+07	0	0	0	0	0	0	0	0	0	0	0	0	0	0	0	0
Fructose	307	1	14.7557	7314.67	1.91922e-10	2.14295e-11	0	1.79917e-10	0	0	0	0	0	506.865	18.3049	5.2546e-12	0	0	0	17107.9	9242.79	0	0	0	0	0	0	0	0	0	0	0	0	0	0	0	0
Fructose	307	2	14.7557	0	0	0	0	0	0	0	0	0	0	0	991.504	0	0	0	0	0	0	0	0	0	0	0	0	0	0	0	0	0	0	0	0	0	0
Fructose	307	3	14.7557	0	0	0	0	0	0	0	0	0	0	62.974	188.372	0	0	4.22406e-13	0	0	0	0	0	0	0	0	0	0	0	0	0	0	0	0	0	0	0
Glucose	319	0	14.9571	5.801e+06	3.77061e+06	4.83706e+06	7.04341e+06	1.12332e+07	5.58074e+06	3.00397e+06	4.4637e+06	2.03883e+06	1.89768e+06	1.72608e+06	1.64742e+06	2.22416e+06	886466	789290	1.79065e+06	7.60595e+07	8.41254e+07	0	0	0	0	0	0	0	0	0	0	0	0	0	0	0	0
Glucose	319	1	14.9571	19885.1	11727	14416.9	18148.7	29423	22799.3	10735.1	8859.18	9456.11	5730.38	4875.61	10123.6	8274.89	3781.25	1702.89	8984.71	320667	333506	0	0	0	0	0	0	0	0	0	0	0	0	0	0	0	0
Glucose	319	2	14.9571	0	807.669	0	0	0	71.0441	0	0	0	0	0	466.568	22.9792	366.395	0	0	35966.7	27502.2	0	0	0	0	0	0	0	0	0	0	0	0	0	0	0	0
Glucose	319	3	14.9571	949.676	569.611	288.085	519.829	953.801	502.866	420.942	283.938	0	0	11.7424	712.488	144.657	120.419	50.6641	252.031	0	0	0	0	0	0	0	0	0	0	0	0	0	0	0	0	0	0
Glucose	319	4	14.9571	55477	24199.6	25168.7	30752.7	18805.6	17427.5	8710.37	3858.22	74711.6	29154.8	47319.4	48649.8	31291.5	7552.76	5646.85	17129.3	535.413	730.804	0	0	0	0	0	0	0	0	0	0	0	0	0	0	0	0
Erythrose4P	357	0	15.27	5676.38	6216.49	6203.92	12907.3	13387.3	11251	10030.3	17910.8	10667.4	11753.2	13191.4	18837	9179.64	8873.17	7795.9	10573.7	586092	674425	0	0	0	0	0	0	0	0	0	0	0	0	0	0	0	0
Erythrose4P	357	1	15.27	333.314	687.779	313.735	949.7	462.44	657.864	1130.56	630.5	126.081	99.2646	131.854	322.509	0	5.79934e-16	5.00635e-16	0	29435.7	37085	0	0	0	0	0	0	0	0	0	0	0	0	0	0	0	0
Erythrose4P	357	2	15.27	14127.4	13511.1	13813.4	11449.5	10595.8	11688	11420.6	7649.86	10634.1	9788.11	11380.9	15708.1	12419.1	9607.41	10205.5	10798.4	39866.8	19096.8	0	0	0	0	0	0	0	0	0	0	0	0	0	0	0	0
Histidine	254	0	15.27	57.2025	117.513	46.1627	85.6916	0.74105	165.006	117.671	108.859	260.9	140.984	497.047	1586.13	195.493	146.998	269.331	344.532	45858.8	41317.8	0	0	0	0	0	0	0	0	0	0	0	0	0	0	0	0
Histidine	254	1	15.27	14988.5	12513.9	15286	23744.9	51406.8	14636.2	7631.14	13244.6	4291.32	8036.71	3994.54	3554.59	4488.45	3239.46	2603.59	5185.92	511210	553917	0	0	0	0	0	0	0	0	0	0	0	0	0	0	0	0
Histidine	254	2	15.27	1245.61	1355.56	1603.54	1465.93	769.326	2149.16	2841.72	1818.3	712.113	446.727	839.238	1433.49	742.046	321.393	349.356	320.012	9963.75	10794.7	0	0	0	0	0	0	0	0	0	0	0	0	0	0	0	0
Histidine	254	3	15.27	1652.38	2245.84	1850.78	2066.45	3159.1	2152.79	1621.5	2105.31	1188.65	1101.69	1478.2	4308.57	1163.04	697.851	600.764	974.589	21791.4	24678.4	0	0	0	0	0	0	0	0	0	0	0	0	0	0	0	0
Histidine	254	4	15.27	633.127	646.157	579.623	476.428	0	626.088	1478.7	713.813	487.478	354.084	612.706	861.954	583.248	567.82	484.355	542.332	13877.9	18936.9	0	0	0	0	0	0	0	0	0	0	0	0	0	0	0	0
Histidine	254	5	15.27	14366.9	11325.2	14931.1	20460	24331.5	18117	18405.6	16695	2957.17	5279.47	2821.97	2425.08	3173.91	2017.97	2456.57	3740.78	153111	175225	0	0	0	0	0	0	0	0	0	0	0	0	0	0	0	0
Lysine (2)	174	0	15.27	0	0	0	0	0	0	0	0	0	0	0	0	0	0	0	0	0	0	0	0	0	0	0	0	0	0	0	0	0	0	0	0	0	0
Lysine (2)	174	1	15.27	0	0	0	0	0	0	0	0	0	0	0	0	0	0	0	0	0	0	0	0	0	0	0	0	0	0	0	0	0	0	0	0	0	0
Lysine (2)	174	2	15.27	0	0	0	0	0	0	0	0	0	0	0	0	0	0	0	0	0	0	0	0	0	0	0	0	0	0	0	0	0	0	0	0	0	0
Lysine (2)	174	3	15.27	0	0	0	0	0	0	0	0	0	0	0	0	0	0	0	0	0	0	0	0	0	0	0	0	0	0	0	0	0	0	0	0	0	0
Lysine (2)	174	4	15.27	0	0	0	0	0	0	0	0	0	0	0	0	0	0	0	0	0	0	0	0	0	0	0	0	0	0	0	0	0	0	0	0	0	0
Lysine (2)	174	5	15.27	0	0	0	0	0	0	0	0	0	0	0	0	0	0	0	0	0	0	0	0	0	0	0	0	0	0	0	0	0	0	0	0	0	0
Sorbitol	319	0	15.39	0	0	0	0	0	0	0	0	0	0	0	0	0	0	0	0	0	0	0	0	0	0	0	0	0	0	0	0	0	0	0	0	0	0
Sorbitol	319	1	15.39	0	0	0	0	0	0	0	0	0	0	0	0	0	0	0	0	0	0	0	0	0	0	0	0	0	0	0	0	0	0	0	0	0	0
Sorbitol	319	2	15.39	0	0	0	0	0	0	0	0	0	0	0	0	0	0	0	0	0	0	0	0	0	0	0	0	0	0	0	0	0	0	0	0	0	0
Sorbitol	319	3	15.39	0	0	0	0	0	0	0	0	0	0	0	0	0	0	0	0	0	0	0	0	0	0	0	0	0	0	0	0	0	0	0	0	0	0
Sorbitol	319	4	15.39	0	0	0	0	0	0	0	0	0	0	0	0	0	0	0	0	0	0	0	0	0	0	0	0	0	0	0	0	0	0	0	0	0	0
Glucosamine	159	0	15.41	0	0	0	0	0	0	0	0	0	0	0	0	0	0	0	0	0	0	0	0	0	0	0	0	0	0	0	0	0	0	0	0	0	0
Glucosamine	159	1	15.41	0	0	0	0	0	0	0	0	0	0	0	0	0	0	0	0	0	0	0	0	0	0	0	0	0	0	0	0	0	0	0	0	0	0
Glucosamine	159	2	15.41	0	0	0	0	0	0	0	0	0	0	0	0	0	0	0	0	0	0	0	0	0	0	0	0	0	0	0	0	0	0	0	0	0	0
Glucosamine	159	3	15.41	0	0	0	0	0	0	0	0	0	0	0	0	0	0	0	0	0	0	0	0	0	0	0	0	0	0	0	0	0	0	0	0	0	0
Tyrosine	280	0	15.42	0	0	0	0	0	0	0	0	0	0	0	0	0	0	0	0	0	0	0	0	0	0	0	0	0	0	0	0	0	0	0	0	0	0
Tyrosine	280	1	15.42	0	0	0	0	0	0	0	0	0	0	0	0	0	0	0	0	0	0	0	0	0	0	0	0	0	0	0	0	0	0	0	0	0	0
Tyrosine	280	2	15.42	0	0	0	0	0	0	0	0	0	0	0	0	0	0	0	0	0	0	0	0	0	0	0	0	0	0	0	0	0	0	0	0	0	0
Tyrosine	280	3	15.42	0	0	0	0	0	0	0	0	0	0	0	0	0	0	0	0	0	0	0	0	0	0	0	0	0	0	0	0	0	0	0	0	0	0
Tyrosine	280	4	15.42	0	0	0	0	0	0	0	0	0	0	0	0	0	0	0	0	0	0	0	0	0	0	0	0	0	0	0	0	0	0	0	0	0	0
Tyrosine	280	5	15.42	0	0	0	0	0	0	0	0	0	0	0	0	0	0	0	0	0	0	0	0	0	0	0	0	0	0	0	0	0	0	0	0	0	0
Tyrosine	280	6	15.42	0	0	0	0	0	0	0	0	0	0	0	0	0	0	0	0	0	0	0	0	0	0	0	0	0	0	0	0	0	0	0	0	0	0
Tyrosine	280	7	15.42	0	0	0	0	0	0	0	0	0	0	0	0	0	0	0	0	0	0	0	0	0	0	0	0	0	0	0	0	0	0	0	0	0	0
Tyrosine	280	8	15.42	0	0	0	0	0	0	0	0	0	0	0	0	0	0	0	0	0	0	0	0	0	0	0	0	0	0	0	0	0	0	0	0	0	0
Tyrosine 218	218	0	15.42	0	0	0	0	0	0	0	0	0	0	0	0	0	0	0	0	0	0	0	0	0	0	0	0	0	0	0	0	0	0	0	0	0	0
Tyrosine 218	218	1	15.42	0	0	0	0	0	0	0	0	0	0	0	0	0	0	0	0	0	0	0	0	0	0	0	0	0	0	0	0	0	0	0	0	0	0
Tyrosine 218	218	2	15.42	0	0	0	0	0	0	0	0	0	0	0	0	0	0	0	0	0	0	0	0	0	0	0	0	0	0	0	0	0	0	0	0	0	0
Pantothenate	247	0	15.83	0	0	0	0	0	0	0	0	0	0	0	0	0	0	0	0	0	0	0	0	0	0	0	0	0	0	0	0	0	0	0	0	0	0
Pantothenate	247	1	15.83	0	0	0	0	0	0	0	0	0	0	0	0	0	0	0	0	0	0	0	0	0	0	0	0	0	0	0	0	0	0	0	0	0	0
Pantothenate	247	2	15.83	0	0	0	0	0	0	0	0	0	0	0	0	0	0	0	0	0	0	0	0	0	0	0	0	0	0	0	0	0	0	0	0	0	0
Pantothenate	247	3	15.83	0	0	0	0	0	0	0	0	0	0	0	0	0	0	0	0	0	0	0	0	0	0	0	0	0	0	0	0	0	0	0	0	0	0
Pantothenate	247	4	15.83	0	0	0	0	0	0	0	0	0	0	0	0	0	0	0	0	0	0	0	0	0	0	0	0	0	0	0	0	0	0	0	0	0	0
Pantothenate	247	5	15.83	0	0	0	0	0	0	0	0	0	0	0	0	0	0	0	0	0	0	0	0	0	0	0	0	0	0	0	0	0	0	0	0	0	0
Deoxyribose5P	357	0	16.07	0	0	0	0	0	0	0	0	0	0	0	0	0	0	0	0	0	0	0	0	0	0	0	0	0	0	0	0	0	0	0	0	0	0
Deoxyribose5P	357	1	16.07	0	0	0	0	0	0	0	0	0	0	0	0	0	0	0	0	0	0	0	0	0	0	0	0	0	0	0	0	0	0	0	0	0	0
Deoxyribose5P	357	2	16.07	0	0	0	0	0	0	0	0	0	0	0	0	0	0	0	0	0	0	0	0	0	0	0	0	0	0	0	0	0	0	0	0	0	0
scyllo-Ins	318	0	16.1	0	0	0	0	0	0	0	0	0	0	0	0	0	0	0	0	0	0	0	0	0	0	0	0	0	0	0	0	0	0	0	0	0	0
scyllo-Ins	318	1	16.1	0	0	0	0	0	0	0	0	0	0	0	0	0	0	0	0	0	0	0	0	0	0	0	0	0	0	0	0	0	0	0	0	0	0
scyllo-Ins	318	2	16.1	0	0	0	0	0	0	0	0	0	0	0	0	0	0	0	0	0	0	0	0	0	0	0	0	0	0	0	0	0	0	0	0	0	0
scyllo-Ins	318	3	16.1	0	0	0	0	0	0	0	0	0	0	0	0	0	0	0	0	0	0	0	0	0	0	0	0	0	0	0	0	0	0	0	0	0	0
scyllo-Ins	318	4	16.1	0	0	0	0	0	0	0	0	0	0	0	0	0	0	0	0	0	0	0	0	0	0	0	0	0	0	0	0	0	0	0	0	0	0
mIns	318	0	16.6	0	0	0	0	0	0	0	0	0	0	0	0	0	0	0	0	0	0	0	0	0	0	0	0	0	0	0	0	0	0	0	0	0	0
mIns	318	1	16.6	0	0	0	0	0	0	0	0	0	0	0	0	0	0	0	0	0	0	0	0	0	0	0	0	0	0	0	0	0	0	0	0	0	0
mIns	318	2	16.6	0	0	0	0	0	0	0	0	0	0	0	0	0	0	0	0	0	0	0	0	0	0	0	0	0	0	0	0	0	0	0	0	0	0
mIns	318	3	16.6	0	0	0	0	0	0	0	0	0	0	0	0	0	0	0	0	0	0	0	0	0	0	0	0	0	0	0	0	0	0	0	0	0	0
mIns	318	4	16.6	0	0	0	0	0	0	0	0	0	0	0	0	0	0	0	0	0	0	0	0	0	0	0	0	0	0	0	0	0	0	0	0	0	0
Ru5P	357	0	16.65	0	0	0	0	0	0	0	0	0	0	0	0	0	0	0	0	0	0	0	0	0	0	0	0	0	0	0	0	0	0	0	0	0	0
Ru5P	357	1	16.65	0	0	0	0	0	0	0	0	0	0	0	0	0	0	0	0	0	0	0	0	0	0	0	0	0	0	0	0	0	0	0	0	0	0
Ru5P	357	2	16.65	0	0	0	0	0	0	0	0	0	0	0	0	0	0	0	0	0	0	0	0	0	0	0	0	0	0	0	0	0	0	0	0	0	0
R5P	459	0	16.68	0	0	0	0	0	0	0	0	0	0	0	0	0	0	0	0	0	0	0	0	0	0	0	0	0	0	0	0	0	0	0	0	0	0
R5P	459	1	16.68	0	0	0	0	0	0	0	0	0	0	0	0	0	0	0	0	0	0	0	0	0	0	0	0	0	0	0	0	0	0	0	0	0	0
R5P	459	2	16.68	0	0	0	0	0	0	0	0	0	0	0	0	0	0	0	0	0	0	0	0	0	0	0	0	0	0	0	0	0	0	0	0	0	0
R5P	459	3	16.68	0	0	0	0	0	0	0	0	0	0	0	0	0	0	0	0	0	0	0	0	0	0	0	0	0	0	0	0	0	0	0	0	0	0
Ru5P b	357	0	16.77	0	0	0	0	0	0	0	0	0	0	0	0	0	0	0	0	0	0	0	0	0	0	0	0	0	0	0	0	0	0	0	0	0	0
Ru5P b	357	1	16.77	0	0	0	0	0	0	0	0	0	0	0	0	0	0	0	0	0	0	0	0	0	0	0	0	0	0	0	0	0	0	0	0	0	0
Ru5P b	357	2	16.77	0	0	0	0	0	0	0	0	0	0	0	0	0	0	0	0	0	0	0	0	0	0	0	0	0	0	0	0	0	0	0	0	0	0
Tryptophan	202	0	17.48	0	0	0	0	0	0	0	0	0	0	0	0	0	0	0	0	0	0	0	0	0	0	0	0	0	0	0	0	0	0	0	0	0	0
Tryptophan	202	1	17.48	0	0	0	0	0	0	0	0	0	0	0	0	0	0	0	0	0	0	0	0	0	0	0	0	0	0	0	0	0	0	0	0	0	0
Tryptophan	202	2	17.48	0	0	0	0	0	0	0	0	0	0	0	0	0	0	0	0	0	0	0	0	0	0	0	0	0	0	0	0	0	0	0	0	0	0
Tryptophan	202	3	17.48	0	0	0	0	0	0	0	0	0	0	0	0	0	0	0	0	0	0	0	0	0	0	0	0	0	0	0	0	0	0	0	0	0	0
Tryptophan	202	4	17.48	0	0	0	0	0	0	0	0	0	0	0	0	0	0	0	0	0	0	0	0	0	0	0	0	0	0	0	0	0	0	0	0	0	0
Tryptophan	202	5	17.48	0	0	0	0	0	0	0	0	0	0	0	0	0	0	0	0	0	0	0	0	0	0	0	0	0	0	0	0	0	0	0	0	0	0
Tryptophan	202	6	17.48	0	0	0	0	0	0	0	0	0	0	0	0	0	0	0	0	0	0	0	0	0	0	0	0	0	0	0	0	0	0	0	0	0	0
Tryptophan	202	7	17.48	0	0	0	0	0	0	0	0	0	0	0	0	0	0	0	0	0	0	0	0	0	0	0	0	0	0	0	0	0	0	0	0	0	0
Tryptophan	202	8	17.48	0	0	0	0	0	0	0	0	0	0	0	0	0	0	0	0	0	0	0	0	0	0	0	0	0	0	0	0	0	0	0	0	0	0
Tryptophan	202	9	17.48	0	0	0	0	0	0	0	0	0	0	0	0	0	0	0	0	0	0	0	0	0	0	0	0	0	0	0	0	0	0	0	0	0	0
Tryptamine	174	0	17.61	0	0	0	0	0	0	0	0	0	0	0	0	0	0	0	0	0	0	0	0	0	0	0	0	0	0	0	0	0	0	0	0	0	0
Tryptamine	174	1	17.61	0	0	0	0	0	0	0	0	0	0	0	0	0	0	0	0	0	0	0	0	0	0	0	0	0	0	0	0	0	0	0	0	0	0
Abscissate	183	0	17.68	0	0	0	0	0	0	0	0	0	0	0	0	0	0	0	0	0	0	0	0	0	0	0	0	0	0	0	0	0	0	0	0	0	0
Abscissate	183	1	17.68	0	0	0	0	0	0	0	0	0	0	0	0	0	0	0	0	0	0	0	0	0	0	0	0	0	0	0	0	0	0	0	0	0	0
Abscissate	183	2	17.68	0	0	0	0	0	0	0	0	0	0	0	0	0	0	0	0	0	0	0	0	0	0	0	0	0	0	0	0	0	0	0	0	0	0
Abscissate	183	3	17.68	0	0	0	0	0	0	0	0	0	0	0	0	0	0	0	0	0	0	0	0	0	0	0	0	0	0	0	0	0	0	0	0	0	0
Abscissate	183	4	17.68	0	0	0	0	0	0	0	0	0	0	0	0	0	0	0	0	0	0	0	0	0	0	0	0	0	0	0	0	0	0	0	0	0	0
Abscissate	183	5	17.68	0	0	0	0	0	0	0	0	0	0	0	0	0	0	0	0	0	0	0	0	0	0	0	0	0	0	0	0	0	0	0	0	0	0
Abscissate	183	6	17.68	0	0	0	0	0	0	0	0	0	0	0	0	0	0	0	0	0	0	0	0	0	0	0	0	0	0	0	0	0	0	0	0	0	0
F6P	357	0	18.12
F6P	357	1	18.12
F6P	357	2	18.12
G6P	357	0	18.1357	18367.2	30288.2	26802.7	32406.4	37506.3	30126.9	17864	18903.3	30427.1	18460.5	32181.1	84252.8	24562.3	11355.2	10807.6	22848.2	2.61487e+07	3.06724e+07	0	0	0	0	0	0	0	0	0	0	0	0	0	0	0	0
G6P	357	1	18.1357	5.48914e-15	1.7182	27.9789	0	321.778	99.0882	0	0	2.1392	1.28344e-15	403.532	0	20.5795	0	37.8541	1.62442e-15	178902	190657	0	0	0	0	0	0	0	0	0	0	0	0	0	0	0	0
G6P	357	2	18.1357	17995.5	23153.8	23483.2	20736.5	21920.7	15537.4	12682.6	13914	13258.3	13512.9	14459.2	15126.7	15112.1	12196.4	10367.1	11780.8	15821.1	9.1864e-13	0	0	0	0	0	0	0	0	0	0	0	0	0	0	0	0
mIns3P	318	0	18.88
mIns3P	318	1	18.88
mIns3P	318	2	18.88
mIns3P	318	3	18.88
mIns3P	318	4	18.88
6PGA	357	0	18.93	10877.1	11494.5	13254.1	16523.5	19806.2	15563.4	12136.7	13790.3	8450.85	7809.18	8496.44	12269.4	5386.18	4447.31	4586.23	5365.49	1.22495e+06	1.04124e+06	0	0	0	0	0	0	0	0	0	0	0	0	0	0	0	0
6PGA	357	1	18.93	0	460.787	0	1052.04	1539.35	584.782	0	410.048	112.032	25.7782	0	33.3108	0	0	0	0	15271.8	20147.8	0	0	0	0	0	0	0	0	0	0	0	0	0	0	0	0
6PGA	357	2	18.93	66184.5	61985.9	73475.5	79884.4	93761.7	70008.4	63286.6	66084.7	41411.7	41620	40731.3	38563.8	40741.9	35994.3	33045.3	38950.3	125063	86910.6	0	0	0	0	0	0	0	0	0	0	0	0	0	0	0	0
Melatonin	232	0	19.13	0	0	0	0	0	0	0	0	0	0	0	0	0	0	0	0	0	0	0	0	0	0	0	0	0	0	0	0	0	0	0	0	0	0
Melatonin	232	1	19.13	0	0	0	0	0	0	0	0	0	0	0	0	0	0	0	0	0	0	0	0	0	0	0	0	0	0	0	0	0	0	0	0	0	0
Melatonin	232	2	19.13	0	0	0	0	0	0	0	0	0	0	0	0	0	0	0	0	0	0	0	0	0	0	0	0	0	0	0	0	0	0	0	0	0	0
Melatonin	232	3	19.13	0	0	0	0	0	0	0	0	0	0	0	0	0	0	0	0	0	0	0	0	0	0	0	0	0	0	0	0	0	0	0	0	0	0
Melatonin	232	4	19.13	0	0	0	0	0	0	0	0	0	0	0	0	0	0	0	0	0	0	0	0	0	0	0	0	0	0	0	0	0	0	0	0	0	0
Melatonin	232	5	19.13	0	0	0	0	0	0	0	0	0	0	0	0	0	0	0	0	0	0	0	0	0	0	0	0	0	0	0	0	0	0	0	0	0	0
Melatonin	232	6	19.13	0	0	0	0	0	0	0	0	0	0	0	0	0	0	0	0	0	0	0	0	0	0	0	0	0	0	0	0	0	0	0	0	0	0
Melatonin	232	7	19.13	0	0	0	0	0	0	0	0	0	0	0	0	0	0	0	0	0	0	0	0	0	0	0	0	0	0	0	0	0	0	0	0	0	0
Melatonin	232	8	19.13	0	0	0	0	0	0	0	0	0	0	0	0	0	0	0	0	0	0	0	0	0	0	0	0	0	0	0	0	0	0	0	0	0	0
Melatonin	232	9	19.13	0	0	0	0	0	0	0	0	0	0	0	0	0	0	0	0	0	0	0	0	0	0	0	0	0	0	0	0	0	0	0	0	0	0
Melatonin	232	10	19.13	0	0	0	0	0	0	0	0	0	0	0	0	0	0	0	0	0	0	0	0	0	0	0	0	0	0	0	0	0	0	0	0	0	0
Serotonin	174	0	19.19	19860.8	25858.9	33427.3	47918.8	65815.1	43813.2	34203	39143.8	15404.9	12597	12873.3	21022.5	9341.88	4578.73	4353.25	8417.18	2.39841e+06	1.73209e+06	0	0	0	0	0	0	0	0	0	0	0	0	0	0	0	0
Serotonin	174	1	19.19	4458.15	5003.24	4882.69	4308.97	4449.45	4069.02	3513.4	4583.92	3970.09	3738.43	4238.3	5844.69	4623.3	4517.89	4254.03	4538.87	2315.4	12972.8	0	0	0	0	0	0	0	0	0	0	0	0	0	0	0	0
sHeptulose7P	357	0	19.76	0	0	0	0	0	0	0	0	0	0	0	0	0	0	0	0	0	0	0	0	0	0	0	0	0	0	0	0	0	0	0	0	0	0
sHeptulose7P	357	1	19.76	0	0	0	0	0	0	0	0	0	0	0	0	0	0	0	0	0	0	0	0	0	0	0	0	0	0	0	0	0	0	0	0	0	0
sHeptulose7P	357	2	19.76	0	0	0	0	0	0	0	0	0	0	0	0	0	0	0	0	0	0	0	0	0	0	0	0	0	0	0	0	0	0	0	0	0	0
Sialic acid	246	0	20.19	0	0	0	0	0	0	0	0	0	0	0	0	0	0	0	0	0	0	0	0	0	0	0	0	0	0	0	0	0	0	0	0	0	0
Sialic acid	246	1	20.19	0	0	0	0	0	0	0	0	0	0	0	0	0	0	0	0	0	0	0	0	0	0	0	0	0	0	0	0	0	0	0	0	0	0
Sialic acid	246	2	20.19	0	0	0	0	0	0	0	0	0	0	0	0	0	0	0	0	0	0	0	0	0	0	0	0	0	0	0	0	0	0	0	0	0	0
Sialic acid	246	3	20.19	0	0	0	0	0	0	0	0	0	0	0	0	0	0	0	0	0	0	0	0	0	0	0	0	0	0	0	0	0	0	0	0	0	0
Sialic acid	246	4	20.19	0	0	0	0	0	0	0	0	0	0	0	0	0	0	0	0	0	0	0	0	0	0	0	0	0	0	0	0	0	0	0	0	0	0
Sucrose	361	0	20.26	0	0	0	0	0	0	0	0	0	0	0	0	0	0	0	0	0	0	0	0	0	0	0	0	0	0	0	0	0	0	0	0	0	0
Sucrose	361	1	20.26	0	0	0	0	0	0	0	0	0	0	0	0	0	0	0	0	0	0	0	0	0	0	0	0	0	0	0	0	0	0	0	0	0	0
Sucrose	361	2	20.26	0	0	0	0	0	0	0	0	0	0	0	0	0	0	0	0	0	0	0	0	0	0	0	0	0	0	0	0	0	0	0	0	0	0
Sucrose	361	3	20.26	0	0	0	0	0	0	0	0	0	0	0	0	0	0	0	0	0	0	0	0	0	0	0	0	0	0	0	0	0	0	0	0	0	0
Sucrose	361	4	20.26	0	0	0	0	0	0	0	0	0	0	0	0	0	0	0	0	0	0	0	0	0	0	0	0	0	0	0	0	0	0	0	0	0	0
Sucrose	361	5	20.26	0	0	0	0	0	0	0	0	0	0	0	0	0	0	0	0	0	0	0	0	0	0	0	0	0	0	0	0	0	0	0	0	0	0
Sucrose	361	6	20.26	0	0	0	0	0	0	0	0	0	0	0	0	0	0	0	0	0	0	0	0	0	0	0	0	0	0	0	0	0	0	0	0	0	0
Lactose	361	0	20.58	0	0	0	0	0	0	0	0	0	0	0	0	0	0	0	0	0	0	0	0	0	0	0	0	0	0	0	0	0	0	0	0	0	0
Lactose	361	1	20.58	0	0	0	0	0	0	0	0	0	0	0	0	0	0	0	0	0	0	0	0	0	0	0	0	0	0	0	0	0	0	0	0	0	0
Lactose	361	2	20.58	0	0	0	0	0	0	0	0	0	0	0	0	0	0	0	0	0	0	0	0	0	0	0	0	0	0	0	0	0	0	0	0	0	0
Lactose	361	3	20.58	0	0	0	0	0	0	0	0	0	0	0	0	0	0	0	0	0	0	0	0	0	0	0	0	0	0	0	0	0	0	0	0	0	0
Lactose	361	4	20.58	0	0	0	0	0	0	0	0	0	0	0	0	0	0	0	0	0	0	0	0	0	0	0	0	0	0	0	0	0	0	0	0	0	0
Lactose	361	5	20.58	0	0	0	0	0	0	0	0	0	0	0	0	0	0	0	0	0	0	0	0	0	0	0	0	0	0	0	0	0	0	0	0	0	0
Lactose	361	6	20.58	0	0	0	0	0	0	0	0	0	0	0	0	0	0	0	0	0	0	0	0	0	0	0	0	0	0	0	0	0	0	0	0	0	0
Cellobiose	361	0	20.68	0	0	0	0	0	0	0	0	0	0	0	0	0	0	0	0	0	0	0	0	0	0	0	0	0	0	0	0	0	0	0	0	0	0
Cellobiose	361	1	20.68	0	0	0	0	0	0	0	0	0	0	0	0	0	0	0	0	0	0	0	0	0	0	0	0	0	0	0	0	0	0	0	0	0	0
Cellobiose	361	2	20.68	0	0	0	0	0	0	0	0	0	0	0	0	0	0	0	0	0	0	0	0	0	0	0	0	0	0	0	0	0	0	0	0	0	0
Cellobiose	361	3	20.68	0	0	0	0	0	0	0	0	0	0	0	0	0	0	0	0	0	0	0	0	0	0	0	0	0	0	0	0	0	0	0	0	0	0
Cellobiose	361	4	20.68	0	0	0	0	0	0	0	0	0	0	0	0	0	0	0	0	0	0	0	0	0	0	0	0	0	0	0	0	0	0	0	0	0	0
Cellobiose	361	5	20.68	0	0	0	0	0	0	0	0	0	0	0	0	0	0	0	0	0	0	0	0	0	0	0	0	0	0	0	0	0	0	0	0	0	0
Cellobiose	361	6	20.68	0	0	0	0	0	0	0	0	0	0	0	0	0	0	0	0	0	0	0	0	0	0	0	0	0	0	0	0	0	0	0	0	0	0
Trehalose	361	0	20.89	0	0	0	0	0	0	0	0	0	0	0	0	0	0	0	0	0	0	0	0	0	0	0	0	0	0	0	0	0	0	0	0	0	0
Trehalose	361	1	20.89	0	0	0	0	0	0	0	0	0	0	0	0	0	0	0	0	0	0	0	0	0	0	0	0	0	0	0	0	0	0	0	0	0	0
Trehalose	361	2	20.89	0	0	0	0	0	0	0	0	0	0	0	0	0	0	0	0	0	0	0	0	0	0	0	0	0	0	0	0	0	0	0	0	0	0
Trehalose	361	3	20.89	0	0	0	0	0	0	0	0	0	0	0	0	0	0	0	0	0	0	0	0	0	0	0	0	0	0	0	0	0	0	0	0	0	0
Trehalose	361	4	20.89	0	0	0	0	0	0	0	0	0	0	0	0	0	0	0	0	0	0	0	0	0	0	0	0	0	0	0	0	0	0	0	0	0	0
Trehalose	361	5	20.89	0	0	0	0	0	0	0	0	0	0	0	0	0	0	0	0	0	0	0	0	0	0	0	0	0	0	0	0	0	0	0	0	0	0
Trehalose	361	6	20.89	0	0	0	0	0	0	0	0	0	0	0	0	0	0	0	0	0	0	0	0	0	0	0	0	0	0	0	0	0	0	0	0	0	0
Palatinose	361	0	21.4	24706.7	26567.1	24160.1	23654.2	26763	22763.2	21644.1	21466.1	18208.9	18332.4	24559.9	25971.8	19708.7	16817.6	20057	18730.5	695505	754715	0	0	0	0	0	0	0	0	0	0	0	0	0	0	0	0
Palatinose	361	1	21.4	0	0	0	0	0	0	0	0	0	0	0	75.0449	0	5.6317e-16	0	0	4856.91	4097.21	0	0	0	0	0	0	0	0	0	0	0	0	0	0	0	0
Palatinose	361	2	21.4	1273.58	1422.13	1514.28	781.136	1117.46	970.646	996.327	841.684	818.541	1002.57	828.629	1180.43	866.118	881.599	766.775	729.765	1471.29	3120.29	0	0	0	0	0	0	0	0	0	0	0	0	0	0	0	0
Palatinose	361	3	21.4	179.028	141.349	4.8422	58.5665	227.684	168.528	74.4052	4.25695	32.4241	1.25429e-16	1.78319e-16	55.263	1.50503e-16	20.8743	1.44814e-16	0	2636.85	3566.45	0	0	0	0	0	0	0	0	0	0	0	0	0	0	0	0
Palatinose	361	4	21.4	7063.93	7708.2	8118.99	5406.06	6551.37	5565.68	6039.6	4443.72	6096.56	4060.75	5716.62	6950.16	5427.45	4326.25	5887.22	5118.43	943.283	1266.1	0	0	0	0	0	0	0	0	0	0	0	0	0	0	0	0
Palatinose	361	5	21.4	659.099	682.233	582.904	660.112	831.357	699.784	851.191	365.787	453.097	243.827	606.638	1018.33	331.016	464.726	200.699	351.009	711.952	998.331	0	0	0	0	0	0	0	0	0	0	0	0	0	0	0	0
Palatinose	361	6	21.4	1965.05	3069.63	2143.76	1814.41	2177.14	2007.2	1639.07	2040.87	1580.83	1496.79	1962.75	3167.43	2232.61	1438.37	1783.68	1721.38	2015.66	3026.57	0	0	0	0	0	0	0	0	0	0	0	0	0	0	0	0

## Sheet: Raw Values
compound Name		Pyruvate	Pyruvate	Pyruvate	Pyruvate	Lactate	Lactate	Lactate	Alanine	Alanine	Alanine	Oxalate	Oxalate	Valine	Valine	Valine	Valine	Valine	Valine 218	Valine 218	Valine 218	Urea	Urea	Leucine	Leucine	Leucine	Leucine	Leucine	Leucine	Leucine 218	Leucine 218	Leucine 218	Glycerol	Glycerol	Glycerol	Isoleucine	Isoleucine	Isoleucine	Isoleucine	Isoleucine	Isoleucine	Isoleucine 218	Isoleucine 218	Isoleucine 218	Proline	Proline	Proline	Proline	Proline
Mass0		174	174	174	174	117	117	117	116	116	116	190	190	144	144	144	144	144	218	218	218	189	189	158	158	158	158	158	158	218	218	218	205	205	205	158	158	158	158	158	158	218	218	218	142	142	142	142	142
Isotope		0	1	2	3	0	1	2	0	1	2	0	1	0	1	2	3	4	0	1	2	0	1	0	1	2	3	4	5	0	1	2	0	1	2	0	1	2	3	4	5	0	1	2	0	1	2	3	4
RT		6.56667	6.56667	6.56667	6.56667	6.63462	6.63462	6.63462	7.24138	7.24138	7.24138	7.61571	7.61571	8.3519	8.3519	8.3519	8.3519	8.3519	8.3519	8.3519	8.3519	8.74143	8.74143	9.1181	9.1181	9.1181	9.1181	9.1181	9.1181	9.128	9.128	9.128	9.07	9.07	9.07	9.39524	9.39524	9.39524	9.39524	9.39524	9.39524	9.29	9.29	9.29	9.28571	9.28571	9.28571	9.28571	9.28571
10ul Metabolite Mix	10ul Metabolite Mix_1.CDF	21724617	3130200	1309233	202194	95747464	1.60157e+07	6690412	5.92866e+07	7939175	2958188	26453	67219	75871956	28902120	1.05565e+07	24151844	4015252	43967640	1.12411e+07	4.63866e+06	77183561	16867971	67046384	3.28522e+07	1.04452e+07	1181762	132692	622922	44372326	10524000	4.61072e+06				54017954	22337488	7391138	825533	257673	872069				70050080	32381632	1.05898e+07	894524	247292
10ul Metabolite Mix	10ul Metabolite Mix_2.CDF	2.37694e+07	3425972	1.44897e+06	204244	90661004	1.65071e+07	6951565	6.30559e+07	8447290	3.13205e+06	31436	120996	69774444	31306137	11329616	26299164	4367664	45137644	1.213e+07	4980303	78818057	18440069	66429456	3.72868e+07	1.18765e+07	1329369	142894	702228	47290310	11909278	5.22822e+06				53942328	26287827	8684296	931346	204971	750385				72598912	36831548	1.19402e+07	999718	83576
Hexane	Hexane_1.CDF	0	0	152	1334	6850.5	2564	11818	0	0	0	0	0	0	0	0	0	0	0	0	0	0	0	0	0	0	0	0	0	0	0	0				0	0	0	0	0	0				0	0	0	0	0
Hexane	Hexane_10.CDF	90	748	1061	8808	20213.5	7587	11767	0	0	0	0	0	0	0	0	0	0	0	0	0	0	0	0	0	0	0	0	0	0	0	0				0	0	0	0	0	0				0	0	0	0	0
Hexane	Hexane_11.CDF	345	1326	2241.5	10457	19258	9077	13527.5	0	0	0	0	0	0	0	0	0	0	0	0	0	0	0	0	0	0	0	0	0	0	0	0				0	0	0	0	0	0				0	0	0	0	0
Hexane	Hexane_12.CDF	0	0	1032	8920	16387	7245	11085	0	0	0	0	0	0	0	0	0	0	0	0	0	0	0	0	0	0	0	0	0	0	0	0				0	0	0	0	0	0				0	0	0	0	0
Hexane	Hexane_13.CDF	7258	7670	5069.5	13302.5	40603	13496.5	23609.5	0	0	0	0	0	0	0	0	0	0	0	0	0	0	0	0	0	0	0	0	0	0	0	0				0	0	0	0	0	0				0	0	0	0	0
Hexane	Hexane_14.CDF	178	498	827	8275	14396	6016	10930.5	0	0	0	0	0	0	0	0	0	0	0	0	0	0	0	0	0	0	0	0	0	0	0	0				0	0	0	0	0	0				0	0	0	0	0
Hexane	Hexane_15.CDF	0	0	322.5	7371.5	9533.5	2619	8168.5	0	0	0	0	0	0	0	0	0	0	0	0	0	0	0	0	0	0	0	0	0	0	0	0				0	0	0	0	0	0				0	0	0	0	0
Hexane	Hexane_16.CDF	0	338	697	8352.5	10668	2686.5	7719	0	0	0	0	0	0	0	0	0	0	0	0	0	0	0	0	0	0	0	0	0	0	0	0				0	0	0	0	0	0				0	0	0	0	0
Hexane	Hexane_2.CDF	0	158	0	6644	6926	1620.5	7757.5	0	0	0	0	0	0	0	0	0	0	0	0	0	0	0	0	0	0	0	0	0	0	0	0				0	0	0	0	0	0				0	0	0	0	0
Hexane	Hexane_3.CDF	0	0	388	7897.5	4078	1931	6472	0	0	0	0	0	0	0	0	0	0	0	0	0	0	0	0	0	0	0	0	0	0	0	0				0	0	0	0	0	0				0	0	0	0	0
Hexane	Hexane_4.CDF	6746.5	6340	4753.5	12575.5	32768	11458	19953	0	0	0	0	0	0	0	0	0	0	0	0	0	0	0	0	0	0	0	0	0	0	0	0				0	0	0	0	0	0				0	0	0	0	0
Hexane	Hexane_5.CDF	862	2957.5	2932	10376	20181	8958	15604.5	0	0	0	0	0	0	0	0	0	0	0	0	0	0	0	0	0	0	0	0	0	0	0	0				0	0	0	0	0	0				0	0	0	0	0
Hexane	Hexane_6.CDF	685	2171	1328	11581.5	19540.5	9030.5	15812.5	0	0	0	0	0	0	0	0	0	0	0	0	0	0	0	0	0	0	0	0	0	0	0	0				0	0	0	0	0	0				0	0	0	0	0
Hexane	Hexane_7.CDF	716	4055.5	4095.5	12078.5	25451.5	9585	17070	0	0	0	0	0	0	0	0	0	0	0	0	0	0	0	0	0	0	0	0	0	0	0	0				0	0	0	0	0	0				0	0	0	0	0
Hexane	Hexane_8.CDF	168	701	1196	9314	21869	9130.5	13566.5	0	0	0	0	0	0	0	0	0	0	0	0	0	0	0	0	0	0	0	0	0	0	0	0				0	0	0	0	0	0				0	0	0	0	0
Hexane	Hexane_9.CDF	0	1053	1257.5	9273.5	24724.5	8744.5	13526.5	0	0	0	0	0	0	0	0	0	0	0	0	0	0	0	0	0	0	0	0	0	0	0	0				0	0	0	0	0	0				0	0	0	0	0
PG1	PG1.CDF	560493	155502	389642	183204	20955226	2372372	1172280	6.88397e+07	8373592	3351843	16313.5	89726	3.29447e+06	457792	175648	726388	172494	635438	155638	64422	189258	120169	1.17865e+06	183771	89105	23223.5	14657.5	54376	215250	666681	183640				34411.5	24654.5	20822	15179.5	10131.5	31215				1918499	307822	109254	34228.5	66282
PG10	PG10.CDF	444598	134450	381540	193156	1.09108e+07	1.26455e+06	784112	72640076	9000070	3.57435e+06	16719	120460	2411900	328582	131652	594536	105886	469618	112774	45891	195464	120592	849446	137753	64111.5	23826.5	14094.5	61328	156755	715340	192936				38553.5	27609	22730	17836	10388.5	39388.5				1667422	274035	102632	42381.5	195843
PG11	PG11.CDF	576130	147097	424819	191131	1.04357e+07	1.17981e+06	687545	69845257	8.65094e+06	3447998	25289	191944	4.44621e+06	611125	231758	877120	196728	854870	205742	89217	239718	137224	1776519	274628	115682	30563	15608.5	54265.5	320672	1003528	271431				39560.5	28943.5	21811	20225.5	10628.5	35296.5				3515006	541625	195041	60079.5	49605
PG12	PG12.CDF	832492	182660	411098	191136	11499695	1311780	769104	63858442	7852980	3124740	27211	263215	1.25226e+07	1692179	615542	1801724	336125	2.41171e+06	573994	236381	295456	170396	6148554	910404	304578	50005	18936	66347	1164607	1562722	440325				41777.5	28063.5	26867	19335	11437.5	33487				1.09313e+07	1595092	552342	97061	120661
PG13	PG13.CDF	621902	154114	425682	188470	10384280	1179502	667379	6.59724e+07	8128097	3.23331e+06	19267.5	181676	4001601	546176	213160	780936	182110	779896	190243	78077.5	210614	135138	1561289	242604	94936.5	25549	16956.5	52214	284849	974614	260408				40440	28251	22466	20231	11182.5	35588				3.06805e+06	473680	167760	52123	47364
PG14	PG14.CDF	488540	133396	429475	193006	9.23454e+06	1.05035e+06	601182	63115033	7790159	3.08625e+06	20433.5	149162	2297538	322120	130458	592056	154055	444070	110632	48518	199720	127479	678297	112489	55340.5	20723.5	13313.5	50861.5	121568	595844	162116				35885.5	24683.5	19672.5	16365.5	10014	36670				1363644	230173	86462	44169	22978
PG15	PG15.CDF	476128	130551	445132	186111	8800911	998242	584638	6.62384e+07	8.18348e+06	3282189	17070	164292	2.24616e+06	311808	123385	596864	156928	436666	108196	47211.5	203052	121340	590518	99921	51344	21344.5	13063	49485.5	114198	530844	144632				34599	25035.5	19814	15788.5	10357.5	33968				1.26769e+06	227800	84894	47171	12269
PG16	PG16.CDF	594250	158942	483740	209390	11544404	1304096	723572	7.43609e+07	9203797	3.65931e+06	22552.5	158040	3762456	512172	202431	781676	174318	728456	174782	71457	230503	140382	1.18142e+06	191402	83998	27371	16205.5	59158	214272	897826	240624				38741	27530.5	21579	19817	10438.5	37412.5				1777384	288972	106282	50165.5	101531
PG2	PG2.CDF	461754	140550	395934	181242	19209328	2.17167e+06	1.09064e+06	68589318	8372013	3.35157e+06	19351	107312	5.39274e+06	737442	280455	974416	209738	1034733	249980	103556	215093	133594	2.10035e+06	318972	134280	28604.5	16727	55677	388970	1027578	277138				35950.5	24892.5	21090	16455	11316.5	32318				4122780	615428	214080	47638	53496
PG3	PG3.CDF	511941	151809	379058	190880	1.89336e+07	2.12768e+06	1056364	67670894	8.34817e+06	3320216	18872	135774	3657342	506476	197320	812632	198104	714341	174142	75728.5	206412	126576	1.30847e+06	203576	97237.5	25796.5	16917	55639	241656	752900	203256				34189.5	24440.5	23056	16141.5	10083	35090.5				2151712	345854	123540	41480	44925
PG4	PG4.CDF	583892	172640	361602	193861	22028118	2.50786e+06	1.23533e+06	65886641	8.1277e+06	3.21883e+06	18488.5	143232	3.44308e+06	477844	187214	744952	146644	670385	164702	67670	191454	118262	1304232	199545	94845	27610	17405	60265	239678	677836	189066				36923.5	24169.5	22537	17041.5	11390.5	35828.5				2.11931e+06	334687	120884	42693	105589
PG5	PG5.CDF	455297	162750	342550	192145	32535197	3.81683e+06	1.85957e+06	70294209	8777258	3480749	16402	113910	4124086	571026	224709	886208	148155	782968	188626	78807.5	219380	151798	1.5845e+06	252484	106648	29098.5	19481.5	67351.5	305844	584760	171954				46565	28539.5	25382.5	18045.5	11802	42648.5				2337869	373562	132898	47804	242797
PG6	PG6.CDF	2.01756e+06	375726	409616	191569	2.06118e+07	2311068	1.13631e+06	59641667	7462724	2936465	22398	174198	2.50177e+06	353459	145924	716324	199606	484122	122650	51808.5	212230	127540	748856	124230	58823.5	23739	16682.5	56743.5	142058	499038	138802				38917	26858.5	26611	16890	11470.5	37327.5				1351915	231226	81966	43863	32307
PG7	PG7.CDF	544395	159056	348398	191954	1.83124e+07	2070640	1019196	5.83735e+07	7.22591e+06	2.83694e+06	21108.5	148624	2.36738e+06	339006	135558	623336	180813	459175	111468	49523.5	183894	114522	647570	109742	63830.5	21931.5	14690	51838	126104	437530	126762				36746	25946.5	21676.5	16102	10240.5	33350				1121879	210178	72524.5	37246	16228
PG8	PG8.CDF	873628	214204	368846	201438	2.024e+07	2.282e+06	1.09857e+06	61822043	7.67871e+06	3.03127e+06	23255	149752	2377077	333132	135646	667708	186498	461815	114496	50167	194262	117328	689750	116684	55241.5	22170	16618.5	52848	135479	436929	122173				35845	26892	22191.5	17304	10487.5	33875.5				1.08014e+06	197974	72674	39228	21357.5
PG9	PG9.CDF	522577	145865	381146	195542	1.08351e+07	1.24335e+06	737732	6.76875e+07	8.39666e+06	3333614	20301.5	154794	2.89579e+06	397743	160422	697520	149894	552384	136747	56233.5	215114	128797	1.01108e+06	161528	85915	27504	16810	62271	180937	768397	214925				38443.5	28229.5	23306	18547.5	11091.5	37456				2.28815e+06	370502	141932	47598	112472
[truncated: 403 more columns]
